# Supplementary material
Source: PubMed Central journal article supplement (PMC3780897)

# Supporting Appendix: Calculation and analysis of Relative Exon Usage Coefficients (REUCs)

Alejandro Reyes, Simon Anders, Robert J. Weatheritt,  
Toby Gibson, Lars M. Steinmetz, Wolfgang Huber

## Contents

|           |                                                           |           |
|-----------|-----------------------------------------------------------|-----------|
| <b>1</b>  | <b>Downloading path and setting environment variables</b> | <b>2</b>  |
| <b>2</b>  | <b>Loading of the data</b>                                | <b>2</b>  |
| <b>3</b>  | <b>Model matrix</b>                                       | <b>3</b>  |
| <b>4</b>  | <b>Preparations for shrinkage fitting</b>                 | <b>9</b>  |
| <b>5</b>  | <b>Fit coefficients with minimal shrinkage</b>            | <b>11</b> |
| <b>6</b>  | <b>Fit the dispersions</b>                                | <b>12</b> |
| <b>7</b>  | <b>Fit coefficients with proper shrinkage</b>             | <b>14</b> |
| <b>8</b>  | <b>Standard errors from likelihood</b>                    | <b>16</b> |
| <b>9</b>  | <b>Rearrange and summerize REUCs</b>                      | <b>20</b> |
| <b>10</b> | <b>Tissue dependence score</b>                            | <b>21</b> |
| <b>11</b> | <b>Test for conservation</b>                              | <b>22</b> |
| <b>12</b> | <b>Explained variance</b>                                 | <b>24</b> |
| <b>13</b> | <b>Load all libraries for plots</b>                       | <b>29</b> |
| <b>14</b> | <b>Backgrounds for enrichments</b>                        | <b>30</b> |

|                                                                                                                   |           |
|-------------------------------------------------------------------------------------------------------------------|-----------|
| <b>15 Figures</b>                                                                                                 | <b>31</b> |
| 15.1 Figure 1B: visualization of REUCs in a CTDU case . . . . .                                                   | 31        |
| 15.2 Figure 2A: PCA analysis . . . . .                                                                            | 35        |
| 15.3 Figure 2B: variance analysis . . . . .                                                                       | 39        |
| 15.4 Figure 2C: conserved tissue-specific vs mya . . . . .                                                        | 42        |
| 15.5 Figure 2D: Tissue strength vs conservation . . . . .                                                         | 44        |
| 15.6 Figure 3D: heatmap of tissue dependence . . . . .                                                            | 46        |
| 15.7 Figure 3A: disordered regions . . . . .                                                                      | 48        |
| 15.8 Figure 3B: venn diagram . . . . .                                                                            | 49        |
| 15.9 Figure 3C: CTDU barchart in different cathegories and com-<br>parison with background set of exons . . . . . | 51        |
| 15.10 Figure 3E: splicing factor motif enrichments . . . . .                                                      | 53        |
| <b>16 Session Info</b>                                                                                            | <b>57</b> |
| <b>17 All genes with strictly CTDU exons.</b>                                                                     | <b>58</b> |

## 1 Downloading path and setting environment variables

Download the following directory:

```
http://www-huber.embl.de/pub/DEUprimates_supplement/SupplementaryFile3
```

Then, you should make the variable PRIMATES reflect the path to this directory:

```
cd ~/
wget -r -nH --cut-dirs=2 \
  --reject="index.html*" \
  http://www-huber.embl.de/pub/DEUprimates_supplement/SupplementaryFile3
export PRIMATES=~ /SupplementaryFile3
```

Then you are ready to reproduce the results from the paper:

## 2 Loading of the data

We use these packages for the analysis of REUCs

```
library( DEXSeq )
library( statmod )
library( multicore )
```

```
library( abind )
library( genefilter )
cores=15
```

The following loads an ExonCountSet with only the count values and the design but no intermediate or final results

```
setwd(Sys.getenv("PRIMATES"))
load( "inputs/ecsTRT.RData" )
```

Normalize factor levels

```
geneIDs(ecs) <- factor( geneIDs(ecs) )
```

### 3 Model matrix

We construct the model frame by taking the design frame (i.e., sample meta data) from the ecs argument and concatenate it to itself. This is because each sample appears with two rows in the model matrix, once with the counts for the exon described by the row and once with the sum of all other exons.

```
modelFrame <- cbind(
  sample = sampleNames(ecs),
  design(ecs),
  sizeFactor = sizeFactors(ecs) )
modelFrame <- rbind(
  cbind( modelFrame, exon="this" ),
  cbind( modelFrame, exon="others" ) )
rownames(modelFrame) <- paste( modelFrame$sample,
  modelFrame$exon, sep="-" )
```

The model frame now:

```
modelFrame
```

|                     | sample         | species | tissue | sex | sizeFactor | exon |
|---------------------|----------------|---------|--------|-----|------------|------|
| ggo-br-F-1-ggo-this | ggo-br-F-1-ggo | ggo     | br     | F   | 2.0067414  | this |
| ggo-br-M-1-ggo-this | ggo-br-M-1-ggo | ggo     | br     | M   | 1.0526627  | this |
| ggo-cb-F-1-ggo-this | ggo-cb-F-1-ggo | ggo     | cb     | F   | 1.6221341  | this |
| ggo-cb-M-1-ggo-this | ggo-cb-M-1-ggo | ggo     | cb     | M   | 0.8665522  | this |
| ggo-ht-F-1-ggo-this | ggo-ht-F-1-ggo | ggo     | ht     | F   | 0.5751154  | this |

|                     |                |     |    |   |           |      |
|---------------------|----------------|-----|----|---|-----------|------|
| ggo-ht-M-1-ggo-this | ggo-ht-M-1-ggo | ggo | ht | M | 0.3945627 | this |
| ggo-kd-F-1-ggo-this | ggo-kd-F-1-ggo | ggo | kd | F | 1.2493353 | this |
| ggo-kd-M-1-ggo-this | ggo-kd-M-1-ggo | ggo | kd | M | 1.3566434 | this |
| ggo-lv-F-1-ggo-this | ggo-lv-F-1-ggo | ggo | lv | F | 1.0174225 | this |
| ggo-lv-M-1-ggo-this | ggo-lv-M-1-ggo | ggo | lv | M | 1.1105119 | this |
| hsa-br-F-1-hsa-this | hsa-br-F-1-hsa | hsa | br | F | 1.6377571 | this |
| hsa-br-M-1-hsa-this | hsa-br-M-1-hsa | hsa | br | M | 1.1801184 | this |
| hsa-br-M-2-hsa-this | hsa-br-M-2-hsa | hsa | br | M | 1.2849264 | this |
| hsa-br-M-3-hsa-this | hsa-br-M-3-hsa | hsa | br | M | 0.9329287 | this |
| hsa-br-M-4-hsa-this | hsa-br-M-4-hsa | hsa | br | M | 0.8513831 | this |
| hsa-br-M-5-hsa-this | hsa-br-M-5-hsa | hsa | br | M | 0.2589920 | this |
| hsa-cb-F-1-hsa-this | hsa-cb-F-1-hsa | hsa | cb | F | 1.6327022 | this |
| hsa-cb-M-1-hsa-this | hsa-cb-M-1-hsa | hsa | cb | M | 2.6374909 | this |
| hsa-ht-F-1-hsa-this | hsa-ht-F-1-hsa | hsa | ht | F | 0.8321838 | this |
| hsa-ht-M-1-hsa-this | hsa-ht-M-1-hsa | hsa | ht | M | 1.1546257 | this |
| hsa-ht-M-2-hsa-this | hsa-ht-M-2-hsa | hsa | ht | M | 1.1002540 | this |
| hsa-kd-F-1-hsa-this | hsa-kd-F-1-hsa | hsa | kd | F | 1.4297802 | this |
| hsa-kd-M-1-hsa-this | hsa-kd-M-1-hsa | hsa | kd | M | 0.9659092 | this |
| hsa-kd-M-2-hsa-this | hsa-kd-M-2-hsa | hsa | kd | M | 1.2008835 | this |
| hsa-lv-M-1-hsa-this | hsa-lv-M-1-hsa | hsa | lv | M | 0.7943727 | this |
| hsa-lv-M-2-hsa-this | hsa-lv-M-2-hsa | hsa | lv | M | 0.8464109 | this |
| mml-br-F-1-mml-this | mml-br-F-1-mml | mml | br | F | 1.0363749 | this |
| mml-br-M-1-mml-this | mml-br-M-1-mml | mml | br | M | 1.0454692 | this |
| mml-br-M-2-mml-this | mml-br-M-2-mml | mml | br | M | 1.3040308 | this |
| mml-cb-F-1-mml-this | mml-cb-F-1-mml | mml | cb | F | 1.2432106 | this |
| mml-cb-M-1-mml-this | mml-cb-M-1-mml | mml | cb | M | 1.1965691 | this |
| mml-ht-F-1-mml-this | mml-ht-F-1-mml | mml | ht | F | 0.6214446 | this |
| mml-ht-M-1-mml-this | mml-ht-M-1-mml | mml | ht | M | 0.7366023 | this |
| mml-kd-F-1-mml-this | mml-kd-F-1-mml | mml | kd | F | 0.7966258 | this |
| mml-kd-M-1-mml-this | mml-kd-M-1-mml | mml | kd | M | 0.6366425 | this |
| mml-lv-F-1-mml-this | mml-lv-F-1-mml | mml | lv | F | 0.6254235 | this |
| mml-lv-M-1-mml-this | mml-lv-M-1-mml | mml | lv | M | 0.8636917 | this |
| ppa-br-F-1-ptr-this | ppa-br-F-1-ptr | ppa | br | F | 1.0709630 | this |
| ppa-br-F-2-ptr-this | ppa-br-F-2-ptr | ppa | br | F | 1.0990228 | this |
| ppa-br-M-1-ptr-this | ppa-br-M-1-ptr | ppa | br | M | 2.0790194 | this |
| ppa-cb-F-1-ptr-this | ppa-cb-F-1-ptr | ppa | cb | F | 1.4753921 | this |
| ppa-cb-M-1-ptr-this | ppa-cb-M-1-ptr | ppa | cb | M | 2.0698628 | this |
| ppa-ht-F-1-ptr-this | ppa-ht-F-1-ptr | ppa | ht | F | 1.1533740 | this |
| ppa-ht-M-1-ptr-this | ppa-ht-M-1-ptr | ppa | ht | M | 0.6629949 | this |
| ppa-kd-F-1-ptr-this | ppa-kd-F-1-ptr | ppa | kd | F | 1.3788909 | this |

|                       |                |     |    |   |           |        |
|-----------------------|----------------|-----|----|---|-----------|--------|
| ppa-kd-M-1-ptr-this   | ppa-kd-M-1-ptr | ppa | kd | M | 1.1443873 | this   |
| ppa-lv-F-1-ptr-this   | ppa-lv-F-1-ptr | ppa | lv | F | 0.6962407 | this   |
| ppa-lv-M-1-ptr-this   | ppa-lv-M-1-ptr | ppa | lv | M | 0.4914894 | this   |
| ppy-br-F-1-ppy-this   | ppy-br-F-1-ppy | ppy | br | F | 1.7079544 | this   |
| ppy-br-M-1-ppy-this   | ppy-br-M-1-ppy | ppy | br | M | 0.7396834 | this   |
| ppy-cb-F-1-ppy-this   | ppy-cb-F-1-ppy | ppy | cb | F | 1.0849149 | this   |
| ppy-ht-F-1-ppy-this   | ppy-ht-F-1-ppy | ppy | ht | F | 0.8499079 | this   |
| ppy-ht-M-1-ppy-this   | ppy-ht-M-1-ppy | ppy | ht | M | 0.4420630 | this   |
| ppy-kd-F-1-ppy-this   | ppy-kd-F-1-ppy | ppy | kd | F | 1.0844965 | this   |
| ppy-kd-M-1-ppy-this   | ppy-kd-M-1-ppy | ppy | kd | M | 1.2865658 | this   |
| ppy-lv-F-1-ppy-this   | ppy-lv-F-1-ppy | ppy | lv | F | 0.5737885 | this   |
| ppy-lv-M-1-ppy-this   | ppy-lv-M-1-ppy | ppy | lv | M | 1.0396424 | this   |
| ptr-br-F-1-ptr-this   | ptr-br-F-1-ptr | ptr | br | F | 1.0693073 | this   |
| ptr-br-M-1-ptr-this   | ptr-br-M-1-ptr | ptr | br | M | 0.7861358 | this   |
| ptr-br-M-2-ptr-this   | ptr-br-M-2-ptr | ptr | br | M | 0.6777453 | this   |
| ptr-br-M-3-ptr-this   | ptr-br-M-3-ptr | ptr | br | M | 0.6998900 | this   |
| ptr-br-M-4-ptr-this   | ptr-br-M-4-ptr | ptr | br | M | 1.1018289 | this   |
| ptr-br-M-5-ptr-this   | ptr-br-M-5-ptr | ptr | br | M | 1.0169716 | this   |
| ptr-cb-F-1-ptr-this   | ptr-cb-F-1-ptr | ptr | cb | F | 2.1463258 | this   |
| ptr-cb-M-1-ptr-this   | ptr-cb-M-1-ptr | ptr | cb | M | 1.2443930 | this   |
| ptr-ht-F-1-ptr-this   | ptr-ht-F-1-ptr | ptr | ht | F | 1.0107497 | this   |
| ptr-ht-M-1-ptr-this   | ptr-ht-M-1-ptr | ptr | ht | M | 1.0698054 | this   |
| ptr-kd-F-1-ptr-this   | ptr-kd-F-1-ptr | ptr | kd | F | 1.6584041 | this   |
| ptr-kd-M-1-ptr-this   | ptr-kd-M-1-ptr | ptr | kd | M | 2.1690272 | this   |
| ptr-lv-F-1-ptr-this   | ptr-lv-F-1-ptr | ptr | lv | F | 1.2792646 | this   |
| ptr-lv-M-1-ptr-this   | ptr-lv-M-1-ptr | ptr | lv | M | 0.5350664 | this   |
| ggo-br-F-1-ggo-others | ggo-br-F-1-ggo | ggo | br | F | 2.0067414 | others |
| ggo-br-M-1-ggo-others | ggo-br-M-1-ggo | ggo | br | M | 1.0526627 | others |
| ggo-cb-F-1-ggo-others | ggo-cb-F-1-ggo | ggo | cb | F | 1.6221341 | others |
| ggo-cb-M-1-ggo-others | ggo-cb-M-1-ggo | ggo | cb | M | 0.8665522 | others |
| ggo-ht-F-1-ggo-others | ggo-ht-F-1-ggo | ggo | ht | F | 0.5751154 | others |
| ggo-ht-M-1-ggo-others | ggo-ht-M-1-ggo | ggo | ht | M | 0.3945627 | others |
| ggo-kd-F-1-ggo-others | ggo-kd-F-1-ggo | ggo | kd | F | 1.2493353 | others |
| ggo-kd-M-1-ggo-others | ggo-kd-M-1-ggo | ggo | kd | M | 1.3566434 | others |
| ggo-lv-F-1-ggo-others | ggo-lv-F-1-ggo | ggo | lv | F | 1.0174225 | others |
| ggo-lv-M-1-ggo-others | ggo-lv-M-1-ggo | ggo | lv | M | 1.1105119 | others |
| hsa-br-F-1-hsa-others | hsa-br-F-1-hsa | hsa | br | F | 1.6377571 | others |
| hsa-br-M-1-hsa-others | hsa-br-M-1-hsa | hsa | br | M | 1.1801184 | others |
| hsa-br-M-2-hsa-others | hsa-br-M-2-hsa | hsa | br | M | 1.2849264 | others |
| hsa-br-M-3-hsa-others | hsa-br-M-3-hsa | hsa | br | M | 0.9329287 | others |

|                       |                |     |    |   |           |        |
|-----------------------|----------------|-----|----|---|-----------|--------|
| hsa-br-M-4-hsa-others | hsa-br-M-4-hsa | hsa | br | M | 0.8513831 | others |
| hsa-br-M-5-hsa-others | hsa-br-M-5-hsa | hsa | br | M | 0.2589920 | others |
| hsa-cb-F-1-hsa-others | hsa-cb-F-1-hsa | hsa | cb | F | 1.6327022 | others |
| hsa-cb-M-1-hsa-others | hsa-cb-M-1-hsa | hsa | cb | M | 2.6374909 | others |
| hsa-ht-F-1-hsa-others | hsa-ht-F-1-hsa | hsa | ht | F | 0.8321838 | others |
| hsa-ht-M-1-hsa-others | hsa-ht-M-1-hsa | hsa | ht | M | 1.1546257 | others |
| hsa-ht-M-2-hsa-others | hsa-ht-M-2-hsa | hsa | ht | M | 1.1002540 | others |
| hsa-kd-F-1-hsa-others | hsa-kd-F-1-hsa | hsa | kd | F | 1.4297802 | others |
| hsa-kd-M-1-hsa-others | hsa-kd-M-1-hsa | hsa | kd | M | 0.9659092 | others |
| hsa-kd-M-2-hsa-others | hsa-kd-M-2-hsa | hsa | kd | M | 1.2008835 | others |
| hsa-lv-M-1-hsa-others | hsa-lv-M-1-hsa | hsa | lv | M | 0.7943727 | others |
| hsa-lv-M-2-hsa-others | hsa-lv-M-2-hsa | hsa | lv | M | 0.8464109 | others |
| mml-br-F-1-mml-others | mml-br-F-1-mml | mml | br | F | 1.0363749 | others |
| mml-br-M-1-mml-others | mml-br-M-1-mml | mml | br | M | 1.0454692 | others |
| mml-br-M-2-mml-others | mml-br-M-2-mml | mml | br | M | 1.3040308 | others |
| mml-cb-F-1-mml-others | mml-cb-F-1-mml | mml | cb | F | 1.2432106 | others |
| mml-cb-M-1-mml-others | mml-cb-M-1-mml | mml | cb | M | 1.1965691 | others |
| mml-ht-F-1-mml-others | mml-ht-F-1-mml | mml | ht | F | 0.6214446 | others |
| mml-ht-M-1-mml-others | mml-ht-M-1-mml | mml | ht | M | 0.7366023 | others |
| mml-kd-F-1-mml-others | mml-kd-F-1-mml | mml | kd | F | 0.7966258 | others |
| mml-kd-M-1-mml-others | mml-kd-M-1-mml | mml | kd | M | 0.6366425 | others |
| mml-lv-F-1-mml-others | mml-lv-F-1-mml | mml | lv | F | 0.6254235 | others |
| mml-lv-M-1-mml-others | mml-lv-M-1-mml | mml | lv | M | 0.8636917 | others |
| ppa-br-F-1-ptr-others | ppa-br-F-1-ptr | ppa | br | F | 1.0709630 | others |
| ppa-br-F-2-ptr-others | ppa-br-F-2-ptr | ppa | br | F | 1.0990228 | others |
| ppa-br-M-1-ptr-others | ppa-br-M-1-ptr | ppa | br | M | 2.0790194 | others |
| ppa-cb-F-1-ptr-others | ppa-cb-F-1-ptr | ppa | cb | F | 1.4753921 | others |
| ppa-cb-M-1-ptr-others | ppa-cb-M-1-ptr | ppa | cb | M | 2.0698628 | others |
| ppa-ht-F-1-ptr-others | ppa-ht-F-1-ptr | ppa | ht | F | 1.1533740 | others |
| ppa-ht-M-1-ptr-others | ppa-ht-M-1-ptr | ppa | ht | M | 0.6629949 | others |
| ppa-kd-F-1-ptr-others | ppa-kd-F-1-ptr | ppa | kd | F | 1.3788909 | others |
| ppa-kd-M-1-ptr-others | ppa-kd-M-1-ptr | ppa | kd | M | 1.1443873 | others |
| ppa-lv-F-1-ptr-others | ppa-lv-F-1-ptr | ppa | lv | F | 0.6962407 | others |
| ppa-lv-M-1-ptr-others | ppa-lv-M-1-ptr | ppa | lv | M | 0.4914894 | others |
| ppy-br-F-1-ppy-others | ppy-br-F-1-ppy | ppy | br | F | 1.7079544 | others |
| ppy-br-M-1-ppy-others | ppy-br-M-1-ppy | ppy | br | M | 0.7396834 | others |
| ppy-cb-F-1-ppy-others | ppy-cb-F-1-ppy | ppy | cb | F | 1.0849149 | others |
| ppy-ht-F-1-ppy-others | ppy-ht-F-1-ppy | ppy | ht | F | 0.8499079 | others |
| ppy-ht-M-1-ppy-others | ppy-ht-M-1-ppy | ppy | ht | M | 0.4420630 | others |
| ppy-kd-F-1-ppy-others | ppy-kd-F-1-ppy | ppy | kd | F | 1.0844965 | others |

|                       |                |     |    |   |           |        |
|-----------------------|----------------|-----|----|---|-----------|--------|
| ppy-kd-M-1-ppy-others | ppy-kd-M-1-ppy | ppy | kd | M | 1.2865658 | others |
| ppy-lv-F-1-ppy-others | ppy-lv-F-1-ppy | ppy | lv | F | 0.5737885 | others |
| ppy-lv-M-1-ppy-others | ppy-lv-M-1-ppy | ppy | lv | M | 1.0396424 | others |
| ptr-br-F-1-ptr-others | ptr-br-F-1-ptr | ptr | br | F | 1.0693073 | others |
| ptr-br-M-1-ptr-others | ptr-br-M-1-ptr | ptr | br | M | 0.7861358 | others |
| ptr-br-M-2-ptr-others | ptr-br-M-2-ptr | ptr | br | M | 0.6777453 | others |
| ptr-br-M-3-ptr-others | ptr-br-M-3-ptr | ptr | br | M | 0.6998900 | others |
| ptr-br-M-4-ptr-others | ptr-br-M-4-ptr | ptr | br | M | 1.1018289 | others |
| ptr-br-M-5-ptr-others | ptr-br-M-5-ptr | ptr | br | M | 1.0169716 | others |
| ptr-cb-F-1-ptr-others | ptr-cb-F-1-ptr | ptr | cb | F | 2.1463258 | others |
| ptr-cb-M-1-ptr-others | ptr-cb-M-1-ptr | ptr | cb | M | 1.2443930 | others |
| ptr-ht-F-1-ptr-others | ptr-ht-F-1-ptr | ptr | ht | F | 1.0107497 | others |
| ptr-ht-M-1-ptr-others | ptr-ht-M-1-ptr | ptr | ht | M | 1.0698054 | others |
| ptr-kd-F-1-ptr-others | ptr-kd-F-1-ptr | ptr | kd | F | 1.6584041 | others |
| ptr-kd-M-1-ptr-others | ptr-kd-M-1-ptr | ptr | kd | M | 2.1690272 | others |
| ptr-lv-F-1-ptr-others | ptr-lv-F-1-ptr | ptr | lv | F | 1.2792646 | others |
| ptr-lv-M-1-ptr-others | ptr-lv-M-1-ptr | ptr | lv | M | 0.5350664 | others |

To construct the model matrix, we first set "index variable", which indicate which columns of the model matrix refer to which factors.

```
sampleIdx <- data.frame( sample = levels(modelFrame$sample),
  col = seq_along( levels(modelFrame$sample) ) )
exonAvgIdx <- max(sampleIdx$col) + 1
sexIdx <- exonAvgIdx + 1
crossIdx <- expand.grid( tissue=levels(modelFrame$tissue),
  species=levels(modelFrame$species) )
crossIdx$col = sexIdx + 1:nrow(crossIdx)
```

```
head(sampleIdx)
```

|   | sample         | col |
|---|----------------|-----|
| 1 | ggo-br-F-1-ggo | 1   |
| 2 | ggo-br-M-1-ggo | 2   |
| 3 | ggo-cb-F-1-ggo | 3   |
| 4 | ggo-cb-M-1-ggo | 4   |
| 5 | ggo-ht-F-1-ggo | 5   |
| 6 | ggo-ht-M-1-ggo | 6   |

```
exonAvgIdx
```

```
[1] 72
```

```
sexIdx
```

```
[1] 73
```

```
head(crossIdx)
```

```
  tissue species col
1     br      ggo  74
2     cb      ggo  75
3     ht      ggo  76
4     kd      ggo  77
5     lv      ggo  78
6     br      hsa  79
```

Next, fill the matrix according to the indexes

```
mm <- matrix( 0, nrow = nrow(modelFrame), ncol = max(crossIdx$col) )
colnames(mm) <- rep( NA, ncol(mm) )
colnames(mm)[sampleIdx$col] <- paste( "sample", sampleIdx$sample, sep="_" )
colnames(mm)[exonAvgIdx] <- "exonAvg"
colnames(mm)[sexIdx] <- "sex"
colnames(mm)[crossIdx$col] <- sprintf( "tissue_%s:species_%s",
  crossIdx$tissue, crossIdx$species )

for( i in 1:nrow(modelFrame) ) {
  mm[ i, sampleIdx$col[ sampleIdx$sample == modelFrame$sample[i] ] ] <- 1
  mm[ i, exonAvgIdx ] <- { if( modelFrame$exon[i] == "this" ) 1 else 0 }
  mm[ i, sexIdx ] <- {
    if( modelFrame$sex[i] == "M" && modelFrame$exon[i] == "this" ) .5 else -.5 }
  mm[ i, crossIdx$col[ crossIdx$tissue == modelFrame$tissue[i]
    & crossIdx$species == modelFrame$species[i] ] ] <-
    { if( modelFrame$exon[i] == "this" ) .5 else -.5 }
}
```

Make the table of "other" counts (i.e., of counts for all exons in the gene but the exon under consideration)

```
a <- do.call( rbind,
  tapply( 1:nrow(ecs), geneIDs(ecs), function(i) {
```



```

      sct <- counts(ecs)[i,,drop=FALSE]
      t( sapply( 1:nrow(sct), function(r)
        colSums( sct[-r,,drop=FALSE] ) ) )
    } ) )
assayData(ecs)[["otherCounts"]] <- a

```

An accessor for this count, and a look into it.

```

otherCounts <- function( ecs ) assayData(ecs)[["otherCounts"]]

str( otherCounts(ecs) )

num [1:119344, 1:71] 206 213 235 225 188 153 146 156 150 143 ...
- attr(*, "dimnames")=List of 2
..$ : NULL
..$ : chr [1:71] "ggo-br-F-1-ggo" "ggo-br-M-1-ggo" "ggo-cb-F-1-ggo" "ggo-cb-M-1-ggo"

```

## 4 Preparations for shrinkage fitting

The likelihood of the negative binomial (without terms that do not depend on muhat) and its gradient w.r.t. muhat

```

ll <- function( muhat, y, disp )
  sum( y * log( muhat ) - ( y + 1/disp ) * log( muhat + 1/disp ) )

dll <- function( muhat, y, disp )
  y / muhat - ( y + 1/disp ) / ( muhat + 1/disp )

```

The function to perform the shrinkage fit.

This function takes a model matrix (mm), a model frame (mf), initial values (beta0), a boolean vector indicating which coefficients to shrink (beta0) and a prior standard deviation as shrinkage goal (priorsd) and performs a GLM fit

```

shrinkageFit <- function( mm, counts,
  dispersions, sizeFactors,
  beta0, shrink, priorsd ) {
  ofit <- optim(
    beta0,
    function(beta) {

```

```

muhat <- exp( mm %% beta ) * sizeFactors
-ll( muhat, counts, dispersions ) + sum( beta[shrink]^2 ) / priorsd^2 / 2 } ,
  function(beta) {
muhat <- exp( mm %% beta ) * sizeFactors
-t( dll( muhat, counts, dispersions ) * muhat ) %% mm
  + beta*shrink / priorsd^2 },
  method="L-BFGS-B",
  control = list( trace=0, maxit=400, factr=1e2 ) )

if( ofit$convergence != 0 )
  warning( "L-BFGS optimization did not converge." )

ofit$par
}

```

This function does the work, with mclapply

```

fitAllExons <- function( ecs, mm, shrink, priorsd ) {
  sf <- rep( sizeFactors(ecs), 2 )
  rows <- 1:nrow(ecs)
  allCoefs <- mclapply( rows,
    function(i) {
if( i %% 1000 == 0 )
  print( i )
if( fData(ecs)$testable[i] ) {
  cnts <- c( counts(ecs)[i,], otherCounts(ecs)[i,] )
  disps <- pmax( 3e-3,
    ifelse( modelFrame$exon=="this",
      fData(ecs)$dispThis[i],
      fData(ecs)$dispOthers ) )
  beta0 <- rep( 2, ncol(mm) )
  ans <- try(
    shrinkageFit( mm, cnts,
      disps, sf, beta0, shrink, priorsd ) )
  if( !inherits( ans, "try-error" ) )
    ans
  else
    rep( NA, ncol(mm) ) }
else
  rep( NA, ncol(mm) ) },

```

```

    mc.cores = cores )
  allCoefs <- do.call( rbind, allCoefs )
  rownames(allCoefs) <- featureNames(ecs)[rows]
  colnames(allCoefs) <- colnames(mm)
  allCoefs
}

```

These coefficients should be subject to shrinkage

```
shrink <- 1:ncol(mm) %in% c( sexIdx, crossIdx$col )
```

## 5 Fit coefficients with minimal shrinkage

For the initial fit, we set all dispersions to a plausible initial value. We have two dispersion values for each exon, one for the response variable with `exon=="this"` in the model frame and one for those with `exon=="others"`.

```
fData(ecs)$dispThis <- .1
fData(ecs)$dispOthers <- .1
```

Now, run the fit.

```
allCoefsWeakShrinkage <- fitAllExons( ecs, mm, shrink, priorsd=1000 )
```

Plot the SD of the cross coefficients against the means of the sample coefficients.

```
plot(
  log2( rowMeans( counts( ecs, normalized=TRUE ) ) ),
  rowSds( allCoefsWeakShrinkage[,crossIdx$col] ) / log(2),
  xlim=c(0,12), ylim=c(0,4), pch=20, cex=.3, col="#00000010",
  xlab="log2 average normalized count for exon",
  ylab="SD of REUCs (log2 scale)" )

```

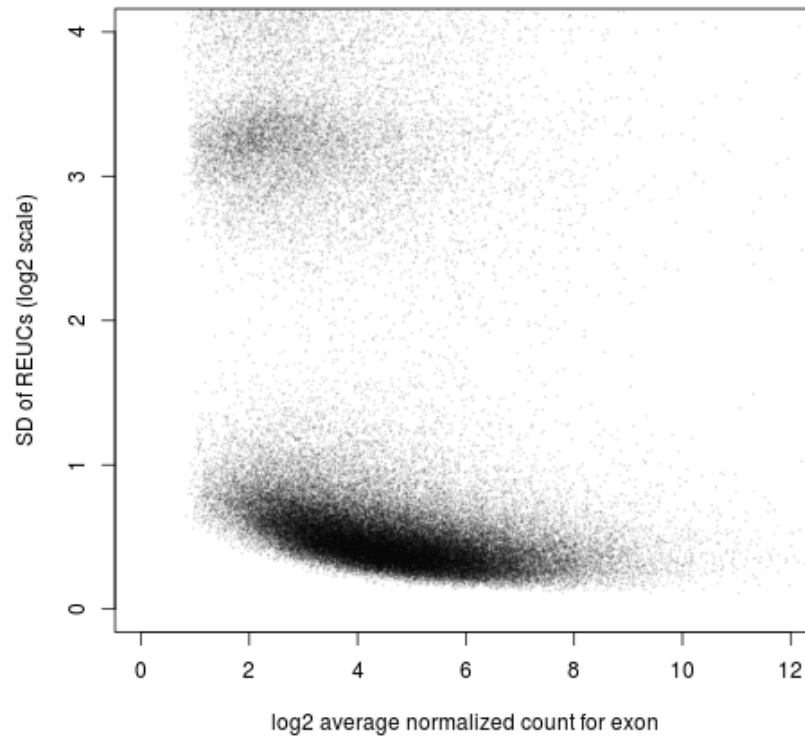

It seems that for sample effects above 8 on a log2 scale, there is only little heteroscedasticity left. Therefore, we take the square root of the mean of these variances as shrinkage prior:

```
priorsd <- sqrt( mean( rowVars( allCoefsWeakShrinkage[
  rowMeans( log2( counts( ecs, normalized=TRUE ) ) ) > 8,
  crossIdx$col ] ), na.rm=TRUE ) )
priorsd
[1] 0.3240358
```

## 6 Fit the dispersions

The Cox-Reid adjusted log likelihood

```
llCR <- function( muhat, y, disp, mm ) {
```

```

ll <- sum( sapply( seq(along=y), function(i)
  dnbinom( y[i], mu=muhat[i], size=1/disp[i], log=TRUE ) ) )
z <- log(muhat) + ( y - muhat ) / muhat
v0 <- muhat + disp * muhat^2
w <- 1 / ( ( 1 / muhat )^2 * v0 )
qrres <- qr( mm*sqrt(w) )
cr <- sum( log( abs( diag( qrres$qr ) [ seq_len(qrres$rank) ] ) ) )
ll - cr
}

```

This function maximizes the adjusted likelihood

```

estimateDispForExon <- function( muhat, y, mm, isThis,
  startDispThis=.1, startDispOthers=.1 ) {
  a <- optim(
    log( c( startDispThis, startDispOthers ) ),
    function( x ) {
  disps <- ifelse( isThis, exp(x[1]), exp(x[2]) )
-llCR( muhat, y, disps, mm ) } )
  names(a$par) <- c( "dispThis", "dispOthers" )
  exp(a$par)
}

```

Calculate the dispersions.

```

rawDisps <- do.call( rbind, mclapply( 1:nrow(ecs), function(i) {
  disps <- try(
    estimateDispForExon(
  as.vector( exp( mm %*% allCoefsWeakShrinkage[i,] ) *
    rep( sizeFactors(ecs), 2 ) ),
  c( counts(ecs)[i,], otherCounts(ecs)[i,] ),
  mm,
  modelFrame$exon == "this" ), silent=TRUE )
  if( !inherits( disps, "try-error" ) )
    disps
  else
    c( NA, NA ) },
  mc.cores=cores ) )

```

Plot the "others" dispersions against the "this" dispersions, highlighting stronger exons in red.

```

plot(
  pmax( 1e-4, rawDisps[,1] ),
  pmax( 1e-4, rawDisps[,2] ), log="xy", pch=".", asp=1,
  col=1+( rowMeans(log10(counts(ecs,normalized=TRUE))) > 2 ) )

```

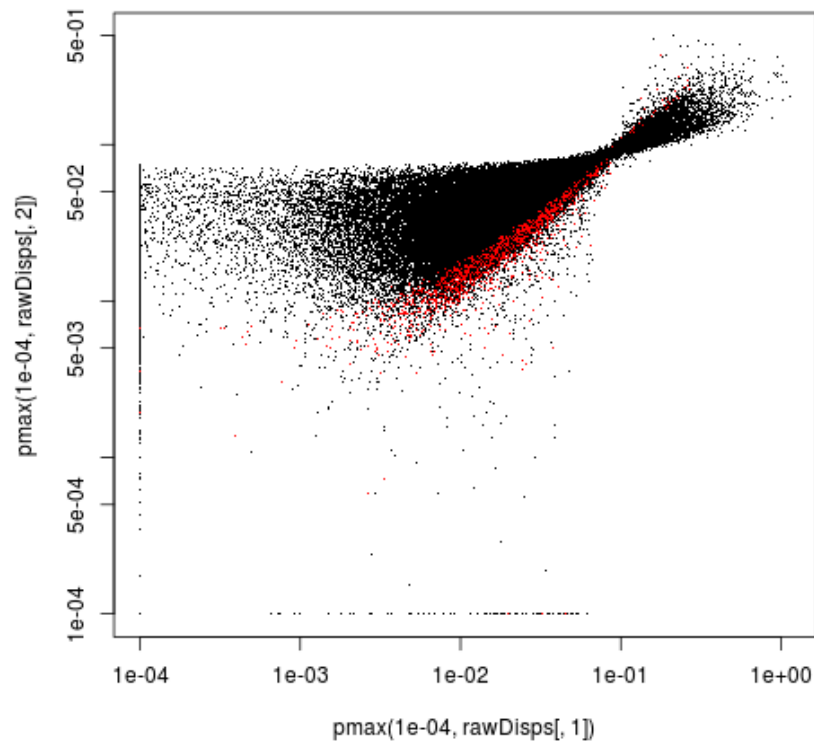

Write the results into the ecs object.

```

fData(ecs)$dispThis <- ifelse( !is.na(rawDisps[,"dispThis"]),
  rawDisps[,"dispThis"], mean( rawDisps[,"dispThis"], na.rm=TRUE ) )
fData(ecs)$dispOthers <- ifelse( !is.na(rawDisps[,"dispOthers"]),
  rawDisps[,"dispOthers"], mean( rawDisps[,"dispOthers"], na.rm=TRUE ) )

```

## 7 Fit coefficients with proper shrinkage

Do the fitting again, now using the priorsd and dispersion values found in the initial fit.

```
allCoefs <- fitAllExons( ecs, mm, shrink, priorsd )
```

Do the plot again.

Plot the SD of the cross coefficients against the means of the sample coefficients.

```
plot(  
  rowMeans( log2( counts( ecs, normalized=TRUE ) ) ),  
  rowSds( allCoefs[,crossIdx$col] ) / log(2),  
  xlim=c(0,12), ylim=c(0,4), pch=20, cex=.3, col="#00000010",  
  xlab="average log2 normalized count for exon",  
  ylab="SD of REUCs (log2 scale)" )
```

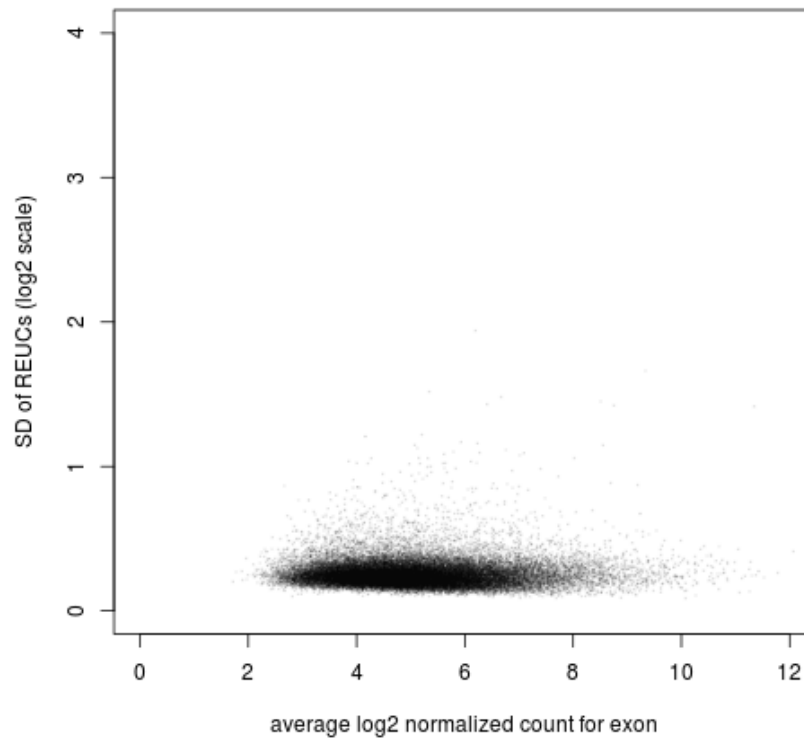

## 8 Standard errors from likelihood

Determine standard errors for the coefficients by calculating the second derivative of the likelihood wrt the coefficients.

```
hStep <- .1
sf <- rep( sizeFactors(ecs), 2 )
allSE <- sqrt( do.call( rbind,
  mclapply( 1:nrow(allCoefs), function(i) {
    if( i %% 1000 == 0 )
    print(i)
    if( any( is.na(allCoefs[i,]) ) )
    rep( NA, ncol(allCoefs) )
    else {
    y <- c( counts(ecs)[i,], otherCounts(ecs)[i,] )
    disps <-
      rep( c( fData(ecs)$dispThis[i], fData(ecs)$dispOthers[i] ),
        each = ncol(ecs) )
    sapply( 1:ncol(allCoefs), function(j) {
      beta <- allCoefs[i,]
      lln <- sapply( c( -hStep, 0, hStep ), function(dbeta) {
        beta[j] <- allCoefs[i,j] + dbeta
        muhat <- exp( mm %*% beta ) * sf
        -ll( muhat, y, disps ) } )
      hStep^2 / ( lln[1] - 2*lln[2] + lln[3] ) } ) } },
      mc.cores=cores ) ) )
dimnames(allSE) <- dimnames(allCoefs)
```

```
[1] 1000
[1] 2000
[1] 3000
[1] 4000
[1] 5000
[1] 6000
[1] 7000
[1] 8000
[1] 9000
[1] 10000
[1] 11000
[1] 12000
```



[1] 13000  
[1] 14000  
[1] 15000  
[1] 16000  
[1] 17000  
[1] 18000  
[1] 19000  
[1] 20000  
[1] 21000  
[1] 22000  
[1] 23000  
[1] 24000  
[1] 25000  
[1] 26000  
[1] 27000  
[1] 28000  
[1] 29000  
[1] 30000  
[1] 31000  
[1] 32000  
[1] 33000  
[1] 34000  
[1] 35000  
[1] 36000  
[1] 37000  
[1] 38000  
[1] 39000  
[1] 40000  
[1] 41000  
[1] 42000  
[1] 43000  
[1] 44000  
[1] 45000  
[1] 46000  
[1] 47000  
[1] 48000  
[1] 49000  
[1] 50000  
[1] 51000  
[1] 52000

[1] 53000  
[1] 54000  
[1] 55000  
[1] 56000  
[1] 57000  
[1] 58000  
[1] 59000  
[1] 60000  
[1] 61000  
[1] 62000  
[1] 63000  
[1] 64000  
[1] 65000  
[1] 66000  
[1] 67000  
[1] 68000  
[1] 69000  
[1] 70000  
[1] 71000  
[1] 72000  
[1] 73000  
[1] 74000  
[1] 75000  
[1] 76000  
[1] 77000  
[1] 78000  
[1] 79000  
[1] 80000  
[1] 81000  
[1] 82000  
[1] 83000  
[1] 84000  
[1] 85000  
[1] 86000  
[1] 87000  
[1] 88000  
[1] 89000  
[1] 90000  
[1] 91000  
[1] 92000

```
[1] 93000
[1] 94000
[1] 95000
[1] 96000
[1] 97000
[1] 98000
[1] 99000
[1] 100000
[1] 101000
[1] 102000
[1] 103000
[1] 104000
[1] 105000
[1] 106000
[1] 107000
[1] 108000
[1] 109000
[1] 110000
[1] 111000
[1] 112000
[1] 113000
[1] 114000
[1] 115000
[1] 116000
[1] 117000
[1] 118000
[1] 119000
```

Warning message:

```
In sqrt(do.call(rbind, mclapply(1:nrow(allCoefs), function(i) { :
  NaNs produced
```

```
str(allSE)
```

```
num [1:119344, 1:103] 0.178 0.16 0.162 0.147 0.129 ...
```

```
- attr(*, "dimnames")=List of 2
```

```
..$ : chr [1:119344] "ENSG00000000419:E005" "ENSG00000000419:E010" "ENSG00000000419:E
```

```
..$ : chr [1:103] "sample_ggo-br-F-1-ggo" "sample_ggo-br-M-1-ggo" "sample_ggo-cb-F-1-g
```

## 9 Rearrange and summerize REUCs

Rearrange cross coefficients (REUCs) into a 3D array.

```
crossCoefs <- do.call( abind, c( along=3,
  tapply( 1:nrow(crossIdx), crossIdx$tissue, function(i) {
    x <- allCoefs[,crossIdx$col[i]];
    colnames(x) <- crossIdx$species[i];
    x} ) ) )
```

```
str(crossCoefs)
```

```
num [1:119344, 1:6, 1:5] -0.368 -0.191 -0.277 -0.171 0.122 ...
```

```
- attr(*, "dimnames")=List of 3
```

```
..$ : chr [1:119344] "ENSG00000000419:E005" "ENSG00000000419:E010" "ENSG00000000419:E
```

```
..$ : chr [1:6] "ggo" "hsa" "mml" "ppa" ...
```

```
..$ : chr [1:5] "br" "cb" "ht" "kd" ...
```

Do the same for their standard errors.

```
crossCoefSEs <- do.call( abind, c( along=3,
  tapply( 1:nrow(crossIdx), crossIdx$tissue, function(i) {
    x <- allSE[,crossIdx$col[i]];
    colnames(x) <- crossIdx$species[i];
    x} ) ) )
```

```
str(crossCoefSEs)
```

```
num [1:119344, 1:6, 1:5] 0.274 0.25 0.255 0.237 0.208 ...
```

```
- attr(*, "dimnames")=List of 3
```

```
..$ : chr [1:119344] "ENSG00000000419:E005" "ENSG00000000419:E010" "ENSG00000000419:E
```

```
..$ : chr [1:6] "ggo" "hsa" "mml" "ppa" ...
```

```
..$ : chr [1:5] "br" "cb" "ht" "kd" ...
```

Calculate standard deviations across tissues:

```
spSDs <- apply( crossCoefs, 1:2, sd )
str( spSDs )
```

```
num [1:119344, 1:6] 0.144 0.172 0.273 0.218 0.135 ...
```

```
- attr(*, "dimnames")=List of 2
```

```
..$ : chr [1:119344] "ENSG00000000419:E005" "ENSG00000000419:E010" "ENSG00000000419:E
```

```
..$ : chr [1:6] "ggo" "hsa" "mml" "ppa" ...
```

Species pairs:

```
spPairs <- t( combn( levels(modelFrame$species), 2 ) )
rownames(spPairs) <- paste( spPairs[,1], spPairs[,2], sep=":" )
head( spPairs )
```

```
      [,1] [,2]
ggo:hsa "ggo" "hsa"
ggo:mml "ggo" "mml"
ggo:ppa "ggo" "ppa"
ggo:ppy "ggo" "ppy"
ggo:ptr "ggo" "ptr"
hsa:mml "hsa" "mml"
```

Calculate covariances

```
sppCovs <- apply( spPairs, 1, function(spp)
  apply( crossCoefs, 1, function(a)
    cov( a[ spp[1], ], a[ spp[2], ] ) ) )
str( sppCovs )
```

```
num [1:119344, 1:15] 0.00724 -0.00471 0.03738 0.01067 0.00687 ...
- attr(*, "dimnames")=List of 2
..$ : chr [1:119344] "ENSG00000000419:E005" "ENSG00000000419:E010" "ENSG00000000419:E011" ...
..$ : chr [1:15] "ggo:hsa" "ggo:mml" "ggo:ppa" "ggo:ppy" ...
```

and correlations

```
sppCors <- apply( spPairs, 1, function(spp)
  apply( crossCoefs, 1, function(a)
    cor( a[ spp[1], ], a[ spp[2], ] ) ) )
str( sppCors )
```

```
num [1:119344, 1:15] 0.473 -0.26 0.716 0.563 0.605 ...
- attr(*, "dimnames")=List of 2
..$ : chr [1:119344] "ENSG00000000419:E005" "ENSG00000000419:E010" "ENSG00000000419:E011" ...
..$ : chr [1:15] "ggo:hsa" "ggo:mml" "ggo:ppa" "ggo:ppy" ...
```

## 10 Tissue dependence score

Get maximum deviation from the average across tissues, within a species

```

maxDevSp <- apply( crossCoefs, 1:2, function(x) {
  xm <- x - mean(x)
  wm <- which.max(abs(xm))
  if( length(wm)!=0 ) xm[wm] else NA } )
str( maxDevSp )

num [1:119344, 1:6] 0.188 -0.225 -0.289 -0.279 0.146 ...
- attr(*, "dimnames")=List of 2
..$ : chr [1:119344] "ENSG00000000419:E005" "ENSG00000000419:E010" "ENSG00000000419:E015" ...
..$ : chr [1:6] "ggo" "hsa" "mml" "ppa" ...

```

Maximize over species

```

maxDev <- apply( maxDevSp, 1, function(x) {
  wm <- which.max(abs(x))
  if( length(wm)!=0 ) x[wm] else NA } )
str( maxDev )

Named num [1:119344] -0.426 -0.247 0.416 -0.279 -0.229 ...
- attr(*, "names")= chr [1:119344] "ENSG00000000419:E005" "ENSG00000000419:E010" "ENSG00000000419:E015" ...

```

Table

```

addmargins( table( cut( abs(maxDev), c( -Inf, 1/2, 1, Inf ) * log(2) ) ) ) )

```

| (-Inf,0.347] | (0.347,0.693] | (0.693, Inf] | Sum   |
|--------------|---------------|--------------|-------|
| 58033        | 30985         | 2578         | 91596 |

```

addmargins( table( cut( abs(maxDevSp[,"hsa"]), c( -Inf, 1/2, 1, Inf ) * log(2) ) ) ) )

```

| (-Inf,0.347] | (0.347,0.693] | (0.693, Inf] | Sum   |
|--------------|---------------|--------------|-------|
| 80032        | 10185         | 1379         | 91596 |

## 11 Test for conservation

```

pAdjCov <- apply( sppCovs, 2, function(a)
  ecdf( a )( -a ) / ( 1 - ecdf( a )( a ) ) )
rownames( pAdjCov ) <- rownames( sppCovs )
str( pAdjCov )

```

```

      ggo:hsa ggo:mml ggo:ppa ggo:ppy ggo:ptr hsa:mml hsa:ppa hsa:ppy hsa:ptr
FALSE  76677  86776  77631  86342  86679  87680  69590  84346  82793
TRUE   14918   4819  13964   5253   4916   3915  22005   7249   8802
      mml:ppa mml:ppy mml:ptr ppa:ppy ppa:ptr ppy:ptr
FALSE  88038  86802  86955  82543  76051  86710
TRUE   3557   4793   4640   9052  15544  4885

```

What are the thresholds?

```

covThrSp <- sapply( rownames(spPairs),
                   function(spp)
                     min( sppCovs[ which( padjCov[,spp] < .1), spp ] ) )
covThrSp
max(covThrSp)

```

```

      ggo:hsa  ggo:mml  ggo:ppa  ggo:ppy  ggo:ptr  hsa:mml  hsa:ppa
0.01920610 0.03548043 0.01938005 0.03092064 0.03507048 0.04659819 0.01623985
      hsa:ppy  hsa:ptr  mml:ppa  mml:ppy  mml:ptr  ppa:ppy  ppa:ptr
0.02848151 0.02774398 0.04708521 0.03461425 0.03949056 0.02379542 0.01991629
      ppy:ptr
0.03606846
[1] 0.04708521

```

The same on log2 scale

```

covThrSp / log(2)^2
max(covThrSp) / log(2)^2

      ggo:hsa  ggo:mml  ggo:ppa  ggo:ppy  ggo:ptr  hsa:mml  hsa:ppa
0.03997497 0.07384787 0.04033703 0.06435726 0.07299461 0.09698803 0.03380112
      hsa:ppy  hsa:ptr  mml:ppa  mml:ppy  mml:ptr  ppa:ppy  ppa:ptr
0.05928054 0.05774547 0.09800170 0.07204503 0.08219443 0.04952705 0.04145316
      ppy:ptr
0.07507177
[1] 0.0980017

```

Let's round this to 0.1

```

covThr <- 0.1 * log(2)^2

```

How many surpass this maximum threshold?

```
apply( sppCovs, 2, function(x) table( x > covThr ) )
```

```

      ggo:hsa ggo:mml ggo:ppa ggo:ppy ggo:ptr hsa:mml hsa:ppa hsa:ppy hsa:ptr
FALSE  87097  88378  87372  88572  88168  87796  86152  87820  86836
TRUE   4499   3218   4224   3024   3428   3800   5444   3776   4760
      mml:ppa mml:ppy mml:ptr ppa:ppy ppa:ptr ppy:ptr
FALSE  88131  88379  87980  88068  86799  88112
TRUE   3465   3217   3616   3528   4797   3484

```

And how many genes?

```

apply( sppCovs, 2, function(x)
  length( unique( substr(
    rownames(sppCovs)[ which( x > covThr ) ],
    1, 15 )
  ) ) )

```

```

ggo:hsa ggo:mml ggo:ppa ggo:ppy ggo:ptr hsa:mml hsa:ppa hsa:ppy hsa:ptr mml:ppa
2044    1487    1924    1380    1568    1643    2310    1653    2023    1584
mml:ppy mml:ptr ppa:ppy ppa:ptr ppy:ptr
1462    1617    1615    2148    1564

```

Compare conservation between human and macaque with tissue dependence score for human:

```

addmargins( table(
  TDS = cut( abs(maxDevSp[,"hsa"]),
    c( -Inf, 1/2, 1, Inf ) * log(2) ),
  cons = sppCovs[,"hsa:mml"] > covThr ) )

```

|               | cons  |      |       |
|---------------|-------|------|-------|
| TDS           | FALSE | TRUE | Sum   |
| (-Inf,0.347]  | 79607 | 425  | 80032 |
| (0.347,0.693] | 7917  | 2268 | 10185 |
| (0.693, Inf]  | 272   | 1107 | 1379  |
| Sum           | 87796 | 3800 | 91596 |

## 12 Explained variance

```

msq <- do.call( rbind, mclapply(
  1:nrow(allCoefs),

```



```

function(i) {
  reucs <- allCoefs[i,crossIdx$col]
  if( any(is.na( reucs )) )
rep( NA, 3 )
  else
anova( lm( REUC ~ species + tissue,
          data.frame( crossIdx,
                     REUC = allCoefs[i,crossIdx$col] ) ) )$'Mean Sq' },
      mc.cores=cores ) )
rownames(msq) <- rownames(allCoefs)
colnames(msq) <- c( "species", "tissue", "residual" )
save(msq, file="objects/explainedVariance.RData")
save.image("objects/REUC_analysis.rda")

gamma <- .3
plot( asinh( msq[,"tissue"] / log(2)^2 / gamma ),
      asinh( msq[,"species"] / log(2)^2 / gamma ),
      pch=20, cex=.2, xaxt="n", yaxt="n", asp=1,
      xlab="variance explained by tissue",
      ylab="variance explained by species",
      col=ifelse( rowSums(sppCovs>covThr) == 15, "#FF000060",
                 ifelse( sppCovs[,"hsa:mml"] > covThr, "#FF00FF60", "#00000060" ) ) ) )
ticks <- c( 0, .1*(1:9), 1:10, 20 )
longTicks <- c( 0, .1, 1, 10 )
for( ax in 1:2 ) {
  labeledTicks <- c( 0, 0.1, 0.2, 0.5, 1, 2, 5, 10, 20 )
  axis( ax, asinh( labeledTicks / gamma ), labeledTicks,
        tcl=0, las=1 )
  axis( ax, asinh( c( 0, .1, 1, 10 ) / gamma ),
        FALSE, tcl=-.8 )
  axis( ax, asinh( c( .1*(2:9), 2:9, 20 ) / gamma ),
        FALSE, tcl=-.4 ) }
abline( h = asinh(0.75/gamma), v = asinh(0.75/gamma),
        col="#00000060", lty="dashed" )

```

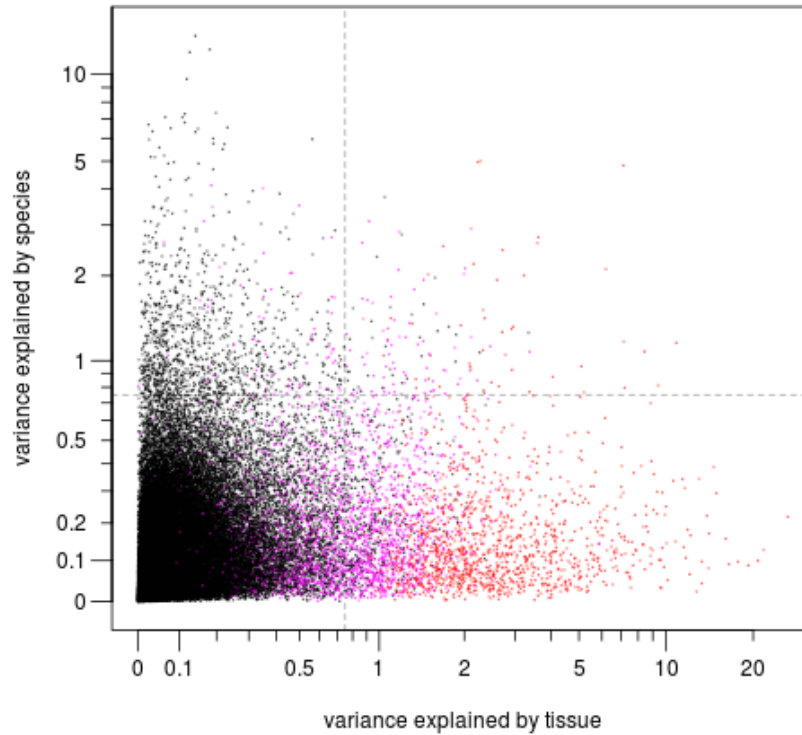

Table:

```
table( 'tissue > 0.75' = msq[,"tissue"] / log(2)^2 > .75,
      'species > 0.75' = msq[,"species"] / log(2)^2 > .75 )
```

|               | species > 0.75 |      |
|---------------|----------------|------|
| tissue > 0.75 | FALSE          | TRUE |
| FALSE         | 87591          | 1189 |
| TRUE          | 2668           | 148  |

Showing tissue versus all variation

```
gamma <- .3
plot( asinh( rowSums(msq) / log(2)^2 / gamma ),
      asinh( msq[,"tissue"] / log(2)^2 / gamma ),
      pch=20, cex=.2, xaxt="n", yaxt="n", asp=1,
      xlab="total variance of REUCs",
```

```

ylab="variance explained by tissue",
col=ifelse( rowSums(sppCovs>covThr) == 15, "#FF000060",
           ifelse( sppCovs[,"hsa:mml"] > covThr, "#FF00FF60", "#00000060" ) ) )
ticks <- c( 0, .1*(1:9), 1:10, 20 )
longTicks <- c( 0, .1, 1, 10 )
for( ax in 1:2 ) {
  labeledTicks <- c( 0, 0.1, 0.2, 0.5, 1, 2, 5, 10, 20 )
  axis( ax, asinh( labeledTicks / gamma ),
        labeledTicks, tcl=0, las=1 )
  axis( ax, asinh( c( 0, .1, 1, 10 ) / gamma ),
        FALSE, tcl=-.8 )
  axis( ax, asinh( c( .1*(2:9), 2:9, 20 ) / gamma ),
        FALSE, tcl=-.4 ) }

```

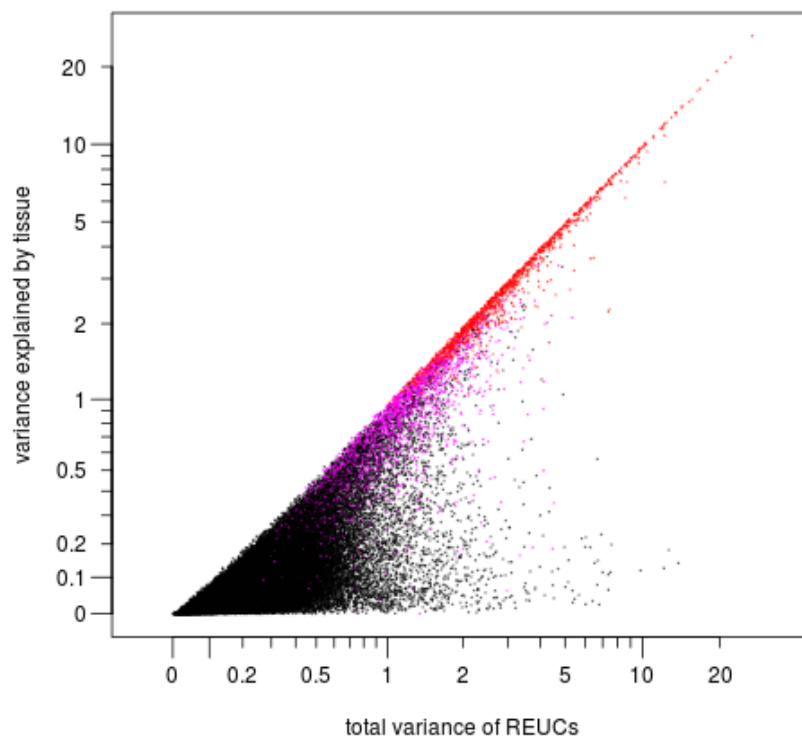

Variation explained by tissue and species plotted in an MA plot  
library(LSD)

```

heatscatter(
  log10( ( msq[,"tissue"] + msq[,"species"] ) / log(2) / gamma ),
  log10( msq[,"tissue"] / msq[,"species"] ),
  xaxt="n", yaxt="n", main="", cor=FALSE, xlim=c(-1.7, 1.9 ), xaxs="i",
  xlab = "Var(tissue)+Var(species)",
  ylab = "Var(tissue) / Var(species)" )
axis( 1, log10( c( .03, .1, .3, 1, 3, 10, 30 ) ),
  c( "0.03", "0.1", "0.3", "1", "3", "10", "30" ) )
axis( 2, (-3:3),
  c( "1/1000", "1/100", "1/10", "1", "10", "100", "1000" ) )
abline( h = -3:3, col="#00000080", lty="dotted" )
abline( h = 0, lty="dotted" )

```

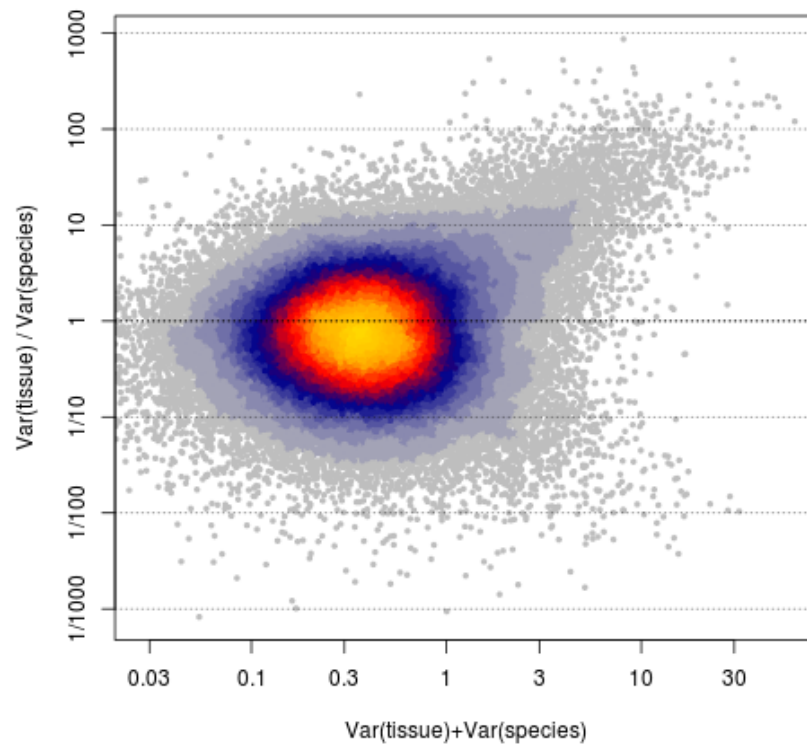

### 13 Load all libraries for plots

```
library(lattice)
library(latticeExtra)
library(DEXSeq)
library(DESeq)
library(parallel)
library(RColorBrewer)
library(MatchIt)
library(geneplotter)
library( plotrix )
library(gplots)
library(Vennerable)
library(ggplot2)
library(GenomicRanges)
library(GenomicFeatures)
## PRIMATES should reflect the path to supplementaryFile3
setwd(Sys.getenv("PRIMATES"))
colSpecies <- brewer.pal(7, "Set1")[-6]
load("objects/REUC_analysis.rda")
load("inputs/ecsTRT.RData")
```

Change the object types for easier acces in further plots

```
species <- dimnames( crossCoefs[ 1, , ] )[[1]]
tissues <- dimnames( crossCoefs[ 1, , ] )[[2]]
allEffects <- lapply( species, function(y){
  vect <- lapply( tissues, function(x){ crossCoefs[ , y , x] } )
  vect <- do.call( cbind, vect )
  colnames( vect ) <- paste(y, tissues, sep="_" )
  vect
} )
names( allEffects ) <- species
allEffects <- do.call( cbind, allEffects )
save(allEffects, file="objects/allEffects.RData")
ctsr <- names( which( rowSums( sppCovs > max( covThr ) )
  == ncol( sppCovs ) ) )
save(ctsr, file="objects/ctsr.RData")
```

## 14 Backgrounds for enrichments

Exon backgrounds

```
load("inputs/ecsTRT.RData")
load("objects/ctsr.RData")

df <- data.frame(
  significant=as.numeric(featureNames(ecs) %in% ctsr),
  mean=rowMeans(counts(ecs)),
  length=fData(ecs)$end-fData(ecs)$start,
  dispersion=fData(ecs)$dispersion
)

df <- df[!is.na( df$significant ),]
back <- c()
for( i in 1:4 ){
  mmcts <- matchit(
    significant ~ mean + length + dispersion,
    df, distance="mahalanobis")
  back <- c(back, mmcts$match.matrix[,1])
  df <- df[-which( rownames(df) %in% back ),]
}

save(back, file="objects/back-exon.RData")

df <- data.frame(
  significant=as.numeric(featureNames(ecs) %in% ctsr),
  mean=rowMeans(counts(ecs)),
  length=fData(ecs)$end-fData(ecs)$start,
  dispersion=fData(ecs)$dispersion
)

df <- df[!is.na( df$significant ),]
domains <- read.delim("inputs/mappedExons_proteinscores.txt",
  header=TRUE, comment.char="#")
domains$exonID <- sub(":", "E", domains$exonID)
df <- df[which( rownames( df ) %in% domains$exonID ),]
```

```

back <- c()
for( i in 1:4 ){
  mmcts <- matchit(
    significant ~ mean + length + dispersion,
    df, distance="mahalanobis")
  back <- c(back, mmcts$match.matrix[,1])
  df <- df[-which( rownames(df) %in% back ),]
}
save(back, file="objects/back-coding.RData")

```

## 15 Figures

### 15.1 Figure 1B: visualization of REUCs in a CTDU case

A shingle plot with an example of CTDU exons, and a representation of a species specific exon usage case. We first prepare the data:

```

geneIDs <- sapply(
  strsplit( dimnames(crossCoefs)[[1]], ":" ), "[(", 1)

getGeneExonLevelDF <- function( gn, zlim=2.5 ) {

  x <- crossCoefs[ which(geneIDs %in% gn), , ]
  zlim=2.5
  # Makes a shingles plot from the a cross-coefficients array

  dimCC <- dim(x)
  names( dimCC ) <- c("exon", "species", "tissue")
  names( dimnames(x) ) <- c("exon", "species", "tissue")
  dimnames(x)$exon <- sub("\\S+:", "", dimnames(x)$exon)

  crossCoefsDF <- data.frame(
exon = factor(
  rep( dimnames(x)$exon,
        each = dimCC["species"] * dimCC["tissue"] ) ),
  levels = c( dimnames(x)$exon ),
species = factor(
  rep( rep( dimnames(x)$species,
            each=dimCC["tissue"] ), dimCC["exon"] ),
  levels = dimnames(x)$species ),

```

```

tissue = factor(
  rep( dimnames(x)$tissue,
        dimCC["exon"]* dimCC["species"] ),
  levels = dimnames(x)$tissue ),
effect = NA_real_ )

for( ex in unique( crossCoefsDF$exon ) ){
  gex <- paste(gn, ex, sep=":")
  anyZero <- tapply( counts(ecs)[gex,],
    list(design(ecs)$specie, design(ecs)$tissue), sum ) == 0
  w <- which( anyZero, arr.ind=TRUE )
  if( length(w) > 0 ){
for( i in 1:nrow(w) ){
  x[ex,w[,"row"][i],w[,"col"][i]] <- -100
}
}
}

for( r in 1:nrow(crossCoefsDF) )
crossCoefsDF$effect[r] <- x[ as.character(crossCoefsDF$exon[r]),
  as.character(crossCoefsDF$species[r]),
  as.character(crossCoefsDF$tissue[r]) ]

crossCoefsDF$effect <- pmin( zlim,
  pmax( -zlim, crossCoefsDF$effect ) )
crossCoefsDF[which( is.na( crossCoefsDF$effect ) ),"effect"]
<- -zlim

cbind( crossCoefsDF, geneID=gn )
}

colors <- colorRampPalette(brewer.pal(3, name="YlGnBu"))(100)
colors <- c("#F8F8F8", colors)

forcts <- getGeneExonLevelDF( "ENSG00000171992" )
forcts <- forcts[forcts$exon %in% tail( levels( forcts$exon ), 5 ),]
forcts$exon <- factor( forcts$exon )
levels(forcts$geneID) <- "SYNPO"

```



```

forcts$species <- factor( forcts$species,
  levels=c("hsa", "ppa", "ptr", "ggo", "ppy", "mml"))

forss <- getGeneExonLevelDF( "ENSG00000136628" )
forss <- forss[forss$exon %in% levels( forss$exon )[2:6],]
forss$exon <- factor( forss$exon )
levels( forss$geneID ) <- "EPRS"
forss$species <- factor( forss$species,
  levels=c("hsa", "ppa", "ptr", "ggo", "ppy", "mml"))

lp <- levelplot(
  effect ~ tissue * species | exon + geneID,
  forcts,
  col.regions=colors,
  as.table=TRUE,
  strip=strip.custom(bg="#E8E8E8"),
  at=seq( -2.5, 2.5, length.out=100 ),
  scales=list(x=list(cex=1.3,
    alternating=c(2, 0, 2, 0, 2, 0, 2, 0)),
    y=list(cex=1.3, alternating=2 ) ),
  ylab=list(label=""),
  xlab=list(label=""),
  colorkey=NULL,
  par.strip.text=list(cex=1.3),
  between=list(x=0, y=1),
)
pr1 <- useOuterStrips( lp,
  strip=strip.custom(bg=c("#E8E8E8", "#E8E8E8") ),
  strip.left=strip.custom(bg=c("#E8E8E8", "#E8E8E8") )
)

lp <- levelplot(
  effect ~ tissue * species | exon + geneID,
  forss,
  col.regions=colors,
  as.table=TRUE,
  at=seq( -2.5, 2.5, length.out=100 ),
  strip=strip.custom(bg="#E8E8E8"),

```

```

scales=list(x=list(cex=1.3,
  alternating=c(0, 1, 0, 1,0, 1, 0, 1)),
  y=list(cex=1.3, alternating=2 ) ),
ylab=list(label=""),
xlab=list(label=""),
colorkey=NULL,
par.strip.text=list(cex=1.3),
between=list(x=0, y=1),
)
pr2 <- useOuterStrips( lp,
  strip=strip.custom(bg=c("#E8E8E8", "#E8E8E8") ),
  strip.left=strip.custom(bg=c("#E8E8E8", "#E8E8E8") ))

```

Warning message:

In max(i) : no non-missing arguments to max; returning -Inf

Now we plot it in a shingle matrix heatmap representation, to make figure 1B:

```

print( pr1, position=c(0, 0.45, 0.9, 1), more=TRUE )
print( pr2, position=c(0, 0, 0.9, 0.55), more=TRUE )
draw.colorkey(
  key=list(
    col=colors,
    at=seq( -4.5, 4.5, length.out=100), labels=list(cex=1.3)
  ),
  draw=TRUE,
  vp=grid::viewport(
    x=grid::unit(0.95, "npc"),
    y=grid::unit(0.5, "npc"),
    height=grid::unit(0.8, "npc")
  )
)

```

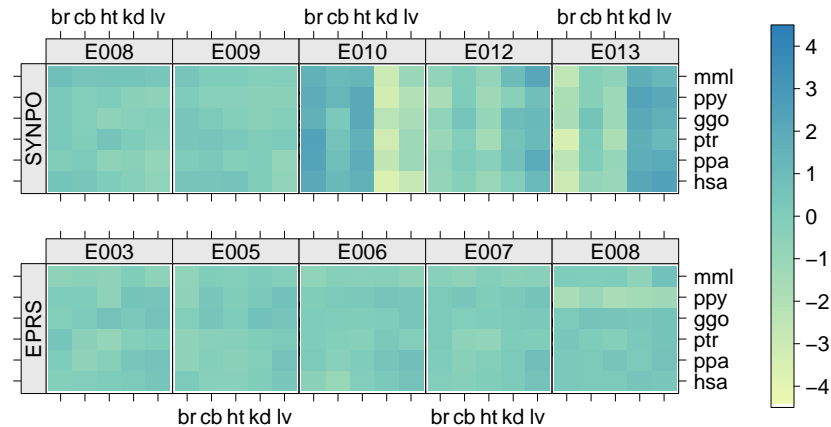

## 15.2 Figure 2A: PCA analysis

Principal component analysis of REUCs with the full data set and two subsets restricting to specific species or tissues. A comparison to gene expression levels was also done:

```
load("objects/allEffects.RData")
sds <- apply( allEffects, 1, sd, na.rm=TRUE)
threshold <- quantile(sds,
  probs=seq(0, 1, 0.1), na.rm=TRUE)["90%"]
newany <- names( which(sds > threshold) )
allEffects <- allEffects[rownames(allEffects) %in% newany,]

pca <- prcomp( t( allEffects ) )
cmp <- rownames(pca$x)
sp <- sapply( strsplit( cmp, "_" ), "[", 1)
ts <- sapply( strsplit( cmp, "_" ), "[", 2)
fullNames <-
  c("gorilla", "human", "rhesus monkey", "bonobo", "orangutan", "chimpanzee")
names(fullNames) <-
  c("ggo", "hsa", "mml", "ppa", "ppy", "ptr")
fullNamesTS <- c("brain", "cerebellum", "heart", "kidney", "liver")
names(fullNamesTS) <- c("br", "cb", "ht", "kd", "lv")
pcaData <- data.frame(
  PC1=pca$x[,"PC1"], PC2=pca$x[,"PC2"],
  which="Exon usage (all)",
```

```

species=fullNames[sp],
tissue=fullNamesTS[ts])

allEffects2 <- allEffects[,!grepl("br|cb|mml", colnames( allEffects ))]
pca <- prcomp( t( allEffects2 ) )
cmp <- rownames(pca$x)
sp <- sapply( strsplit( cmp, "_" ), "[", 1)
ts <- sapply( strsplit( cmp, "_" ), "[", 2)
pcaData <- rbind( pcaData,
  data.frame(
    PC1=pca$x[, "PC1"],
    PC2=pca$x[, "PC2"],
    which="Exon usage (subset 1)",
    species=fullNames[sp],
    tissue=fullNamesTS[ts]))

allEffects3 <- allEffects[,!grepl("mml|cb|br|ht|ppy", colnames( allEffects ))]
pca <- prcomp( t( allEffects3 ) )
cmp <- rownames(pca$x)
sp <- sapply( strsplit( cmp, "_" ), "[", 1)
ts <- sapply( strsplit( cmp, "_" ), "[", 2)
pcaData <- rbind( pcaData,
  data.frame(
    PC1=pca$x[, "PC1"],
    PC2=pca$x[, "PC2"],
    which="Exon usage (subset 2)",
    species=fullNames[sp],
    tissue=fullNamesTS[ts]))

load("inputs/ecsTRT.RData")
geneCounts <- geneCountTable( ecs )
cds <- newCountDataSet( as.matrix(geneCounts), conditions=design(ecs))
cds <- estimateSizeFactors( cds )
norCounts <- counts(cds, normalized=TRUE)

forPCA <- sapply( rownames( norCounts ), function(gn){
  singleGene <- tapply(norCounts[gn,],
    INDEX=list( pData(cds)$specie, pData(cds)$tissue ),
    mean)

```

```

singleGeneVec <- as.vector( singleGene )
names(singleGeneVec) <- as.vector(
  sapply(colnames(singleGene),
    function(x){
      paste(x, rownames(singleGene), sep="_")
    } ) )
singleGeneVec
})

forPCA <- t( forPCA )
forPCA <- log( forPCA )
forPCA[ which( is.infinite( forPCA ) ) ] <- NA
NAS <- apply( forPCA, 1, function(x){!any(is.na(x))})
forPCA <- forPCA[NAS,]

thesholdExp <- quantile(apply( forPCA, 1, sd ),
  seq(0, 1, 0.1))["90%"]
forPCA <-
  forPCA[which( apply( forPCA, 1, sd ) > thesholdExp ),]
pca <- prcomp( t( forPCA ) )
cmp <- rownames(pca$x)
sp <- sapply( strsplit( cmp, "_" ), "[", 2)
ts <- sapply( strsplit( cmp, "_" ), "[", 1)
pcaData <- rbind(data.frame(
  PC1=pca$x[, "PC1"],
  PC2=pca$x[, "PC2"],
  which="Gene expression",
  species=fullNames[sp],
  tissue=fullNamesTS[ts]), pcaData)
save(pcaData, file="objects/pcaData.RData")

pcaData$species <- factor(pcaData$species,
  levels=c("human", "bonobo",
    "chimpanzee", "gorilla", "orangutan", "rhesus monkey"))
signs <- c("B", "C", "H", "K", "L")
colSpecies <- brewer.pal(7, "Set1")[-6]

pcaData[pcaData[,3] == "Gene expression",c(1,2)] <-
  pcaData[pcaData[,3] == "Gene expression",c(1,2)] * 0.5

```

We plot the different PCA panels in the same panel

```
theme.novpadding <-
  list(layout.heights =
list(top.padding = 0,
      main.key.padding = 0,
      key.axis.padding = 0,
      axis.xlab.padding = 0,
      xlab.key.padding = 0,
      key.sub.padding = 0,
      bottom.padding = 0.1),
layout.widths =
list(left.padding = 0.2,
      key.ylab.padding = 0,
      ylab.axis.padding = 0,
      axis.key.padding = 0,
      right.padding = 0))

with( pcaData,
      xyplot( PC2 ~ PC1 | which, layout=c(3,2), cex=1,
              panel=function(x, y, ..., subscripts){
                pch<-signs[tissue[subscripts]];
                col=colSpecies[species[subscripts]];
                panel.xyplot(x, y, pch=pch, col=col, cex=2.3 )
              },
              xlim=c(-35, 35),
              ylim=c(-35, 35),
              index.cond=list(c(2, 3, 4, 1)),
              ylab=list(label="PC2", cex=1.3),
              xlab=list(label="PC1", cex=1.3),
              scales=list(x=list(cex=1.3), y=list(cex=1.3)),
              par.strip.text=list(cex=1.3),
              strip=strip.custom(bg="lightgray"),
              par.settings = theme.novpadding,
              panel.error=NULL,
              key=list(
                x=0.38, y=0.80, adj=1,
                text=list( levels(tissue), cex=1.3 ),
                points = list( pch=signs, cex=1.7 ),
                text = list( levels(species), cex=1.3),
```

```

    points = list( pch=20, col=colSpecies, cex=1.5),
    rep=FALSE)
  )
)

```

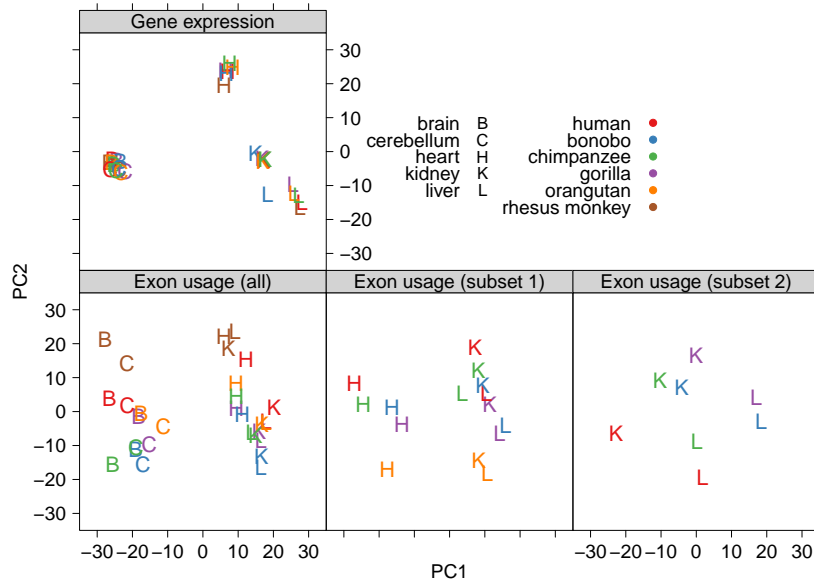

### 15.3 Figure 2B: variance analysis

We plotted the variance explained by tissues vs the variance explained by species, as in figure 2B:

```

gamma <- .3
par(mar=c(5, 5, 1, 1))
plot(
  asinh( msq["tissue"] / log(2)^2 / gamma ),
  asinh( msq["species"] / log(2)^2 / gamma ),
  pch=16, cex=1, xaxt="n", yaxt="n", asp=1,
  xlab="variance explained by tissue",
  ylab="variance explained by species",
  col=ifelse( rowSums(sppCovs>covThr) == 15, "#FF000030",
    ifelse( sppCovs["hsa:mml"] > covThr, "#FF00FF30", "#00000030" ) ), cex.lab=2)
ticks <- c( 0, .1*(1:9), 1:10, 20 )
longTicks <- c( 0, .1, 1, 10 )
for( ax in 1:2 ) {

```

```

labeledTicks <- c( 0, 0.1, 0.2, 0.5, 1, 2, 5, 10, 20 )
axis( ax,
      asinh( labeledTicks / gamma ),
      labeledTicks, tcl=0, las=1, cex.axis=1.6)
axis( ax,
      asinh( c( 0, .1, 1, 10 ) / gamma ),
      FALSE, tcl=-.8, cex.axis=1.6)
axis( ax, asinh( c( .1*(2:9), 2:9, 20 ) / gamma ),
      FALSE, tcl=-.4, cex.axis=1.6) }
abline( h = asinh(0.75/gamma),
        v = asinh(0.75/gamma),
        col="#ACCEE6", lty="dashed",
        lwd=7)
mat <- as.matrix (
  table(
    asinh( msq[,"species"] / log(2)^2 / gamma )
    > asinh(0.75/gamma),
    asinh( msq[,"tissue"] / log(2)^2 / gamma )
    > asinh(0.75/gamma)) ) [2:1,]
addtable2plot(x=asinh(13), y=asinh(18.5), table=mat,
  display.colnames=FALSE, cex=2, lwd=0,
  hlines=FALSE, vlines=FALSE, box.col="blue")
segments(asinh(35), asinh(20),
  asinh(35), asinh(40), lty="dashed", lwd=7, col="#ACCEE6" )
segments(asinh(13),
  asinh(28), asinh(85), asinh(28),
  lty="dashed", lwd=7, col="#ACCEE6" )

```



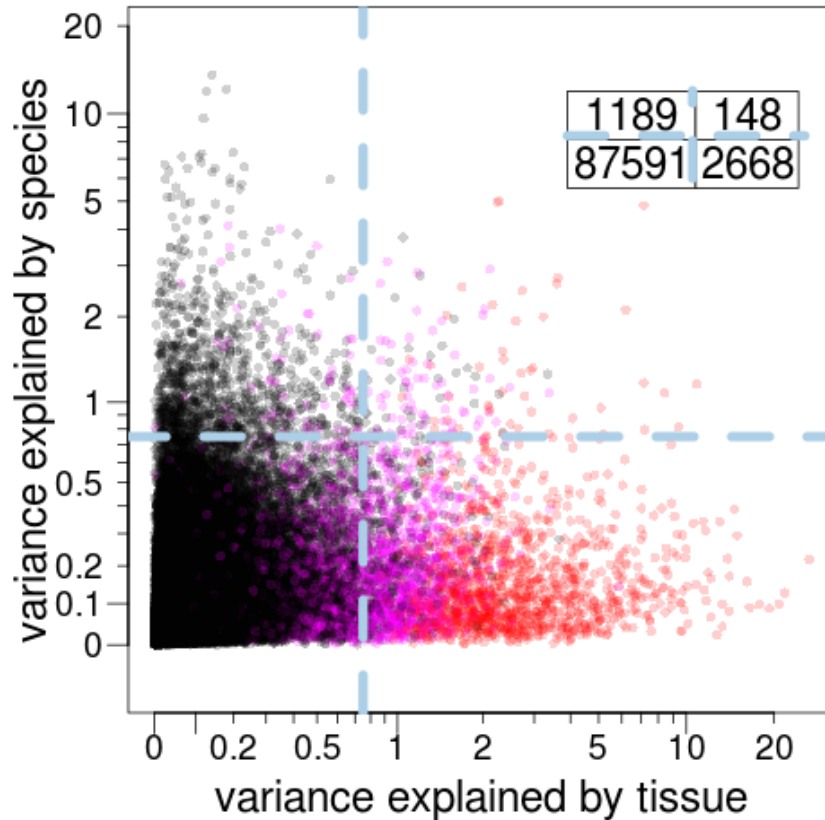

As in figure S3, we plot the histogram of the ratio between the variance explained by tissue and the variance explained by species:

```

par(mfrow=c(1, 3))
par(mar=c(6, 5, 1, 0.1))
hist(
  (msq["tissue"] / log(2)^2/0.3 ) -
  ( msq["species"] / log(2)^2 /0.3 ),
  breaks=450, xlim=c(-20, -3), cex.axis=2.2, main="",
  ylim=c(0, 500), xlab="", cex.lab=2.5, col="darkgray")
par(mar=c(6, 4, 1, 0.1))
hist(
  (msq["tissue"] / log(2)^2/0.3 ) -
  ( msq["species"] / log(2)^2 /0.3 ),
  breaks=900, xlim=c(-3, 3), cex.axis=2.2, main="", ylab="",
  xlab="", col="darkgray")

```

```

text(x=0, y=-5500,
     label="variance explained by
           tissue minus variance explained by species",
     xpd=NA, cex=2.5)
abline( v=0, col="red", lwd=2)
par(mar=c(6, 4, 1, 1))
hist( (msq[,"tissue"] / log(2)^2/0.3 ) -
      ( msq[,"species"] / log(2)^2 /0.3 ),
      breaks=450, xlim=c(3, 20), cex.axis=2.2,
      main="", ylim=c(0, 500),
      ylab="", xlab="", col="darkgray")

```

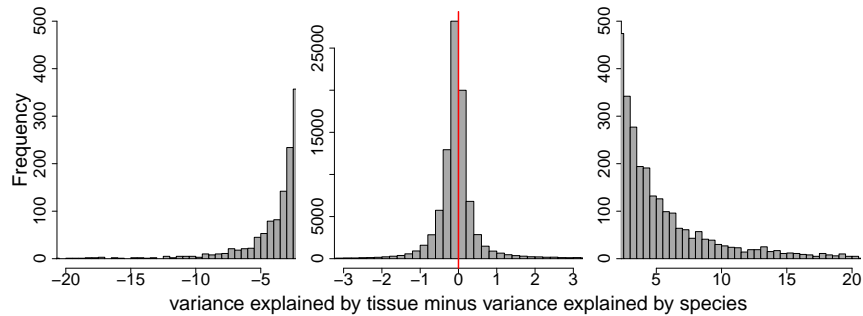

#### 15.4 Figure 2C: conserved tissue-specific vs mya

We plot the number of CTDU exons between human and the rest of the primates vs divergence time in million years (according to Israfil et al, 2011). We do some data preparation:

```

spPairsDist <- c( 8.6, 33.6, 8.6,
                 17.5, 8.6, 33.6, 6.1, 17.5, 6.1,
                 33.6, 33.6, 33.6, 17.5, 3.9, 17.5 )
names( spPairsDist ) <- colnames( sppCovs )
human <- sppCovs[,which( grepl("hsa", colnames( padjCov )) )]
numb <- colSums( human > covThr, na.rm=TRUE )
extra <- numb[c("hsa:ppa", "ggo:hsa")]
good <- numb[c("hsa:ptr", "ggo:hsa", "hsa:ppy", "hsa:mml")]

```

Now we can do the plot from figure 2B. In which we can see that the number of CTDU exons decreases with evolutionary time.

```

par(mar=c(5, 5, 1, 0.5))

```

```

plot( spPairsDist[names(good)],
      good, lwd=5, cex.lab=2, ylab="number of exons with CTDU",
      xlab="divergence from human (Mya)",
      cex.axis=1.8, xlim=c(0, 35),
      ylim=c(0, 7000), type="l", col="#C11B17")
lines( spPairsDist[names(extra)],
      extra, type="l", lwd=5, col="#C11B17")
points( spPairsDist[names(numb)], numb, cex=2, pch=16)
text(spPairsDist[names(extra)[1]],
     extra[1]+250, label="bonobo", adj=0.05,
     cex=1.8, srt=30, font=2 )
text(spPairsDist[names(good)[1]]-4.9,
     good[1]-680, label="chimp", adj=0.05,
     cex=1.8, srt=30, font=2 )
text(spPairsDist[names(good)[2]]+0.5,
     good[2]+150, label="gorilla",
     adj=0.05, cex=1.8, srt=30, font=2 )
text(spPairsDist[names(good)[3]]+0.5, good[3]+190,
     label="orangutan", adj=0.05, cex=1.8, srt=30, font=2 )
text(spPairsDist[names(good)[4]]-11,
     good[4]-1580, label="rhesus monkey",
     adj=0.05, cex=1.8, srt=30, font=2 )

```

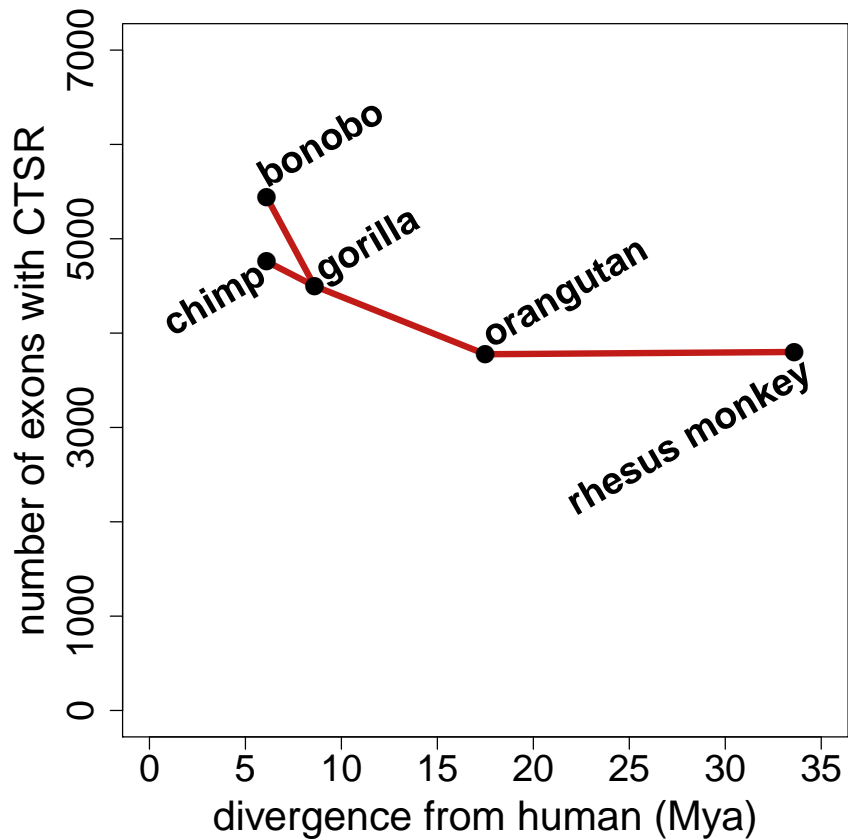

### 15.5 Figure 2D: Tissue strength vs conservation

In order to see the relation between conservation of the regulation and strength of tissue-dependent usage, we plot these two variables. This results in figure 2D.

```

layout(mat=as.matrix(c(1, 2), ncol=2),
       heights=c(1, 4), widths=c(1, 1))
par(mar=c(0, 8, 0.1, 0.3))
hist(abs(maxDevSp[,"hsa"])/log(2),
     100, xlim=c(0, 3.2), xaxt="n",
     main="", cex.axis=1.8, cex.lab=1.8,
     ylab="", yaxt="n", lwd=3)
par(mar=c(4.5, 8, 0.1, 0.3))
cols <- ifelse( sppCovs[,"hsa:mml"] < covThr,

```

```

"#00000015", "#C11B1770")
plot(
  abs(maxDevSp[,"hsa"])/log(2),
  sppCors[,"hsa:mml"], pch=16,
  cex=1, cex.lab=1.65, cex.axis=1.65,
  xlim=c(0, 3.2),
  ylab="correlation coefficient of REUCs
  \nbetween human and macaque",
  xlab="tissue dependence score in human",
  col=cols, lwd=3)
abline(v=1, col="darkgray", lty=2, lwd=7)

```

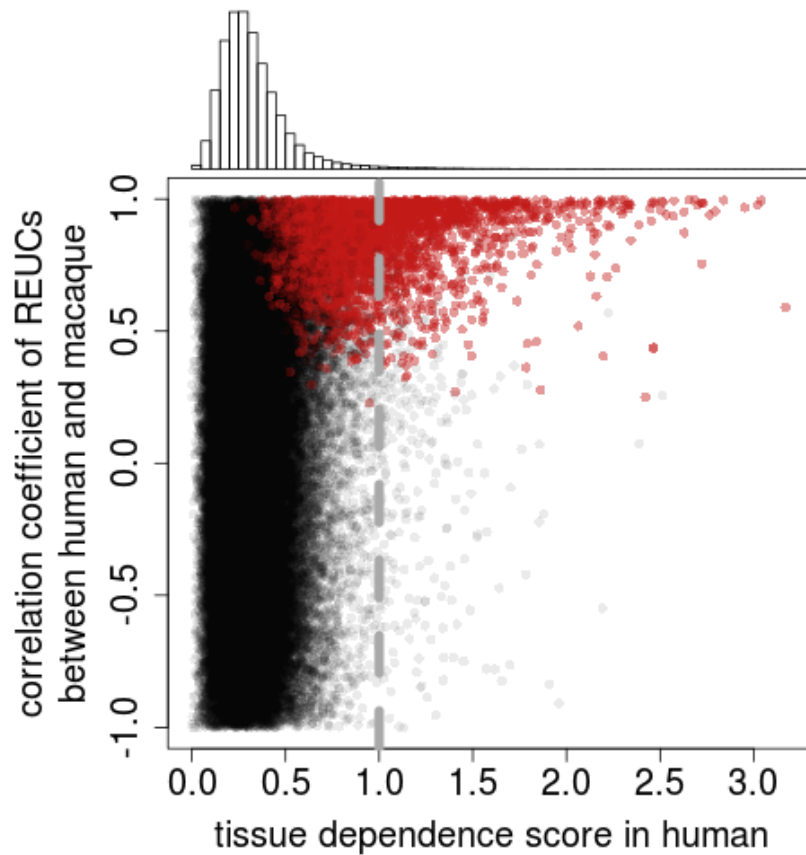

## 15.6 Figure 3D: heatmap of tissue dependence

We classify our set of strictly conserved exons according to their mean REUC across species. We represent this in a heatmap, which we present in figure 3.

```
load("objects/allEffects.RData")
load("objects/ctsr.RData")
meanTiCoefs <- apply( crossCoefs, c( 1, 3 ), mean )
forClust <- meanTiCoefs[ctsr,]
tiDirs <- do.call( expand.grid,
  sapply( colnames(meanTiCoefs),
    function(ti) c( -1, 1 ),
    simplify=FALSE ) )
save( tiDirs, file="objects/classesDefinition.RData")
tiDirClass <- apply(
  meanTiCoefs[ ctsr, ] %*% t( as.matrix(tiDirs) ),
  1, which.max )
save(tiDirClass, file="objects/CDUT-class.RData")
sortedClasses <- sort( tiDirClass )
forClust <- forClust[names( sort( tiDirClass ) ),]
colors <- colorRampPalette(
  brewer.pal(3, name="YlGnBu"))(100)
colors2 <- brewer.pal(n=5, "Set1")
colors2 <- colors2[-2]
cols <- rep("gray", nrow(forClust))
goodClasses <- names( head( sort(
  sapply( split( names( sortedClasses ), sortedClasses ),
    length ), decreasing=TRUE ), 4 ) )
goodClasses <- as.numeric( goodClasses )
for( i in 1:4 ) {
  cols[which( sortedClasses == goodClasses[i] )] <-
    colors2[i]
}
```

We make the heatmap

```
heatmap.2( forClust, col=colors,
  breaks=seq( -1, 1, length.out=101)^3,
  trace="none", dendrogram="none", Rowv=FALSE,
  keysize=1.3, labRow=rep("", nrow(forClust)),
```

```
labCol=c("brain", "cerebellum", "heart", "kidney", "liver"),
densadj=1, Colv=FALSE, margins=c(10, 1), RowSideColors=cols,
lhei=c(2, 10), cexCol=2.3, density.info="none")
```

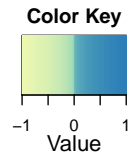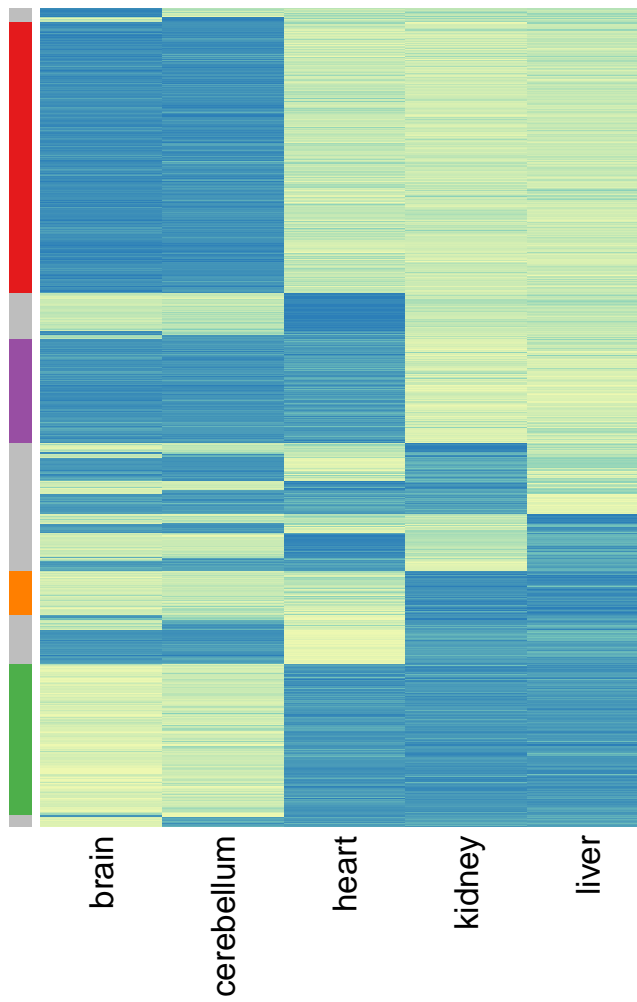

## 15.7 Figure 3A: disordered regions

TDU is known to be enriched in protein disordered regions that are often mediate protein-protein interactions. We verify this in our set of CTDU exons and strengthen this result.

We first load and prepare all the relevant data. Including the predictions from IUPRED.

```
protFeatures <- read.table(
  "inputs/mappedExons_proteinscores.txt",
  header=TRUE, stringsAsFactors=FALSE)
rownames( protFeatures ) <-
  gsub(":", ":E", as.character(protFeatures$exonID))
load("objects/ctsr.RData")
load("inputs/ecsTRT.RData")
load("objects/CDUT-class.RData")
load("objects/back-coding.RData")
goodmat <- rbind(
  ctsr=table(
    protFeatures
    [which(rownames(protFeatures) %in% ctsr),
    "IUPred_disorder.0.4"] ),
  back=table(
    protFeatures
    [which(rownames(protFeatures) %in% back),
    "IUPred_disorder.0.4"] ))[,2:1]
goodData <- t( goodmat / rowSums( goodmat ) )
```

We can then do a barchart to see how it compares to our set of CTDU exons.

```
par(mar=c(3, 5, 4, 0.5))
barplot(goodData,
  col=c("darkgreen", "lightgray"),
  names=c("CTSR", "background"),
  cex.axis=2, ylab="fraction of coding exons",
  cex.lab=2, xpd=FALSE, cex.names=2)
legend(x=0.6, y=1.16,
  legend="disordered regions",
  fill="darkgreen", xpd=TRUE,
  cex=2, box.lty=0)
```



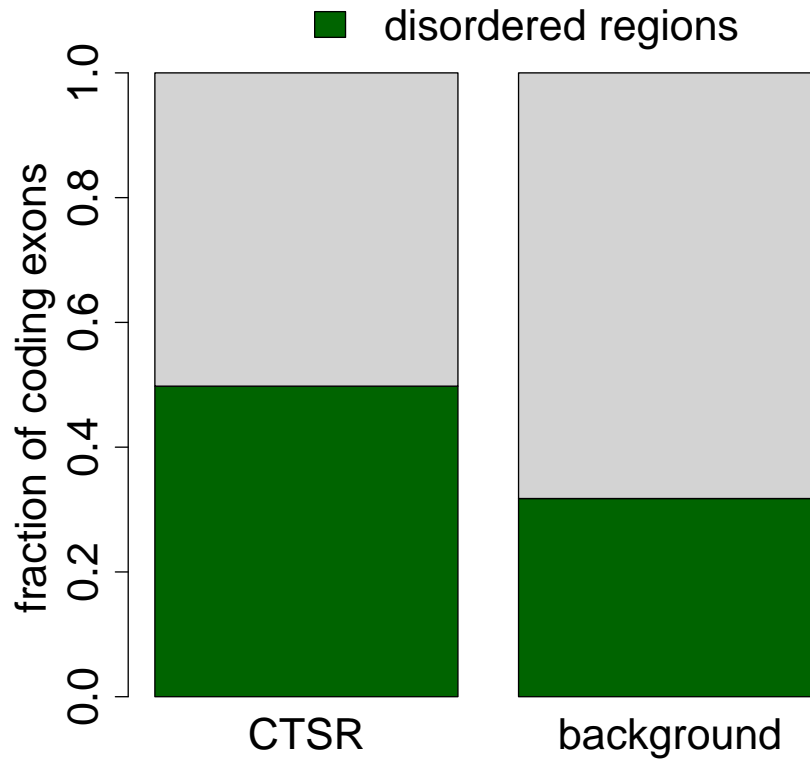

15.8 Figure 3B: venn diagram

```

load("inputs/ecstrt.RData")
load("inputs/utrRanges.RData")
codexons <- read.table("inputs/frames.txt", header=FALSE)
coding <- unique( sub(":", ":E", codexons$V1) )

exons <- GRanges(
  seqname=fData(ecs)$chr,
  ranges=IRanges(start=fData(ecs)$start,
    end=fData(ecs)$end, names=featureNames(ecs)),
  strand=fData(ecs)$strand)
fiveExons <- unique(
  names( exons[queryHits(
    findOverlaps( exons, fiveRanges ) ] ] ) )
threeExons <- unique(

```

```

names( exons[queryHits(
  findOverlaps( exons, threeRanges ) ] ) )
load("objects/ctsr.RData")

Vtypes <- Venn(
  list(
    'all'=ctsr, '5' UTR'=ctsr[ctsr %in% fiveExons],
    'coding exon'=ctsr[ctsr %in% coding],
    '3' UTR'=ctsr[ctsr %in% threeExons] ))
Vtypes <- Vtypes[,2:4]
colnames( Vtypes@IndicatorWeight )[1:3] <-
  c("5' untranslated", "translated", "3' untranslated")
plot( Vtypes, show=list(Faces=FALSE) )

```

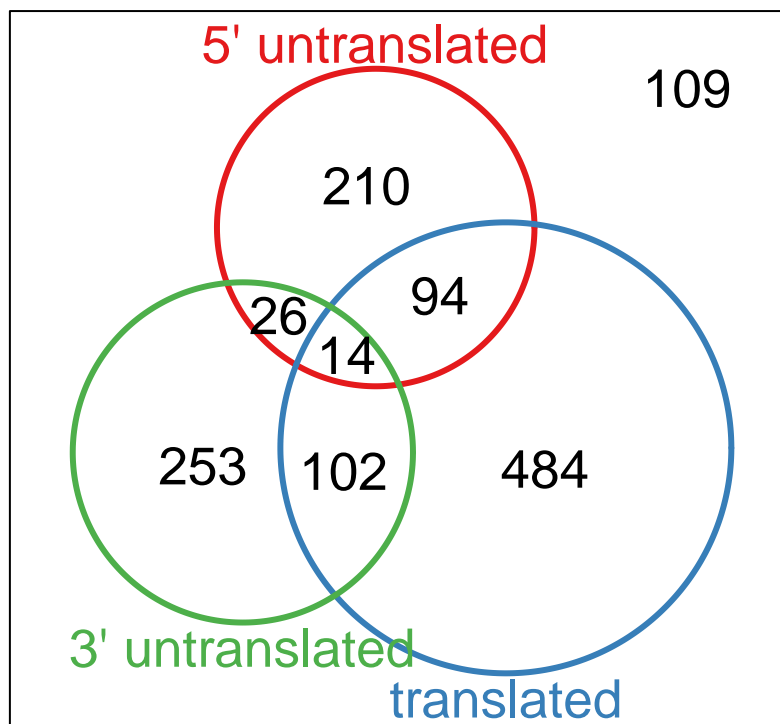

## 15.9 Figure 3C: CTDU barchart in different categories and comparison with background set of exons

```
load("inputs/ecsTRT.RData")
exons <- GRanges(
  seqnames=fData(ecs)$chr,
  ranges=IRanges(
    fData(ecs)$start,
    fData(ecs)$end,
    names=rownames(fData(ecs)) ),
  strand=fData(ecs)$strand )
load("objects/back-exon.RData")
load("objects/ctsr.RData")

makeContTable <- function(utrs, exons ){
  a <- length( intersect( exons, utrs ) )
  b <- length( intersect( back, utrs ) )
  mat <- rbind(
    fore=c( UTR=a, nonUTR=abs( a-length( ctrs ) ) ),
    back=c( UTR=b, nonUTR=abs(b - length( back ) ) )
  )
  return( mat )
}

load("inputs/codingornot.RData")
utr3 <- makeContTable( goodthreeExons, ctrs )
utr5 <- makeContTable( goodfiveExons, ctrs )
coding <- makeContTable( goodcoding, ctrs )

fisher.test( rbind( utr3[,1], utr5[,1], coding[,1]) )

nums <- c( (utr5[,1] / rowSums( utr5 )),
  c(coding[,1]/rowSums(coding)),
  (utr3[,1] / rowSums( utr3 ) ) )
df <- data.frame(
  fraction=nums, set=names(nums),
  region=
  c("5' UTR", "5' UTR",
    "translated", "translated",
    "3' UTR", "3' UTR" ) )
```

```
df$region <- factor(
  df$region,
  levels=levels(df$region)[c(2,3,1)] )
df$set <- factor(
  df$set,
  levels=c("fore", "back"))
```

#### Fisher's Exact Test for Count Data

```
data: rbind(utr3[, 1], utr5[, 1], coding[, 1])
p-value = 2.697e-14
alternative hypothesis: two.sided
```

We plot the result in a barplot

```
bp <- qplot(
  region, data=df, geom="bar",
  fill=set, weight=fraction,
  position="dodge" ) +
  scale_fill_manual(name="",
    values=c("#C11B17", "darkgray"),
    labels=c("CTDU ", "background")) +
  scale_x_discrete("") +
  theme(
    axis.title.y = element_text(size=27, vjust=.3),
    axis.text.x=element_text(size=25, colour="black"),
    axis.text.y=element_text(size=25, colour="black",
    angle=90, hjust=0.45),
    legend.text=element_text(size=20, colour="black"),
    legend.position="top", legend.direction="horizontal",
    panel.grid.minor=element_line(size=0.5, color="white"))
  + scale_y_continuous(limits=c(0, .45) )
bp$labels$y <- "fraction of exons"
bp
```

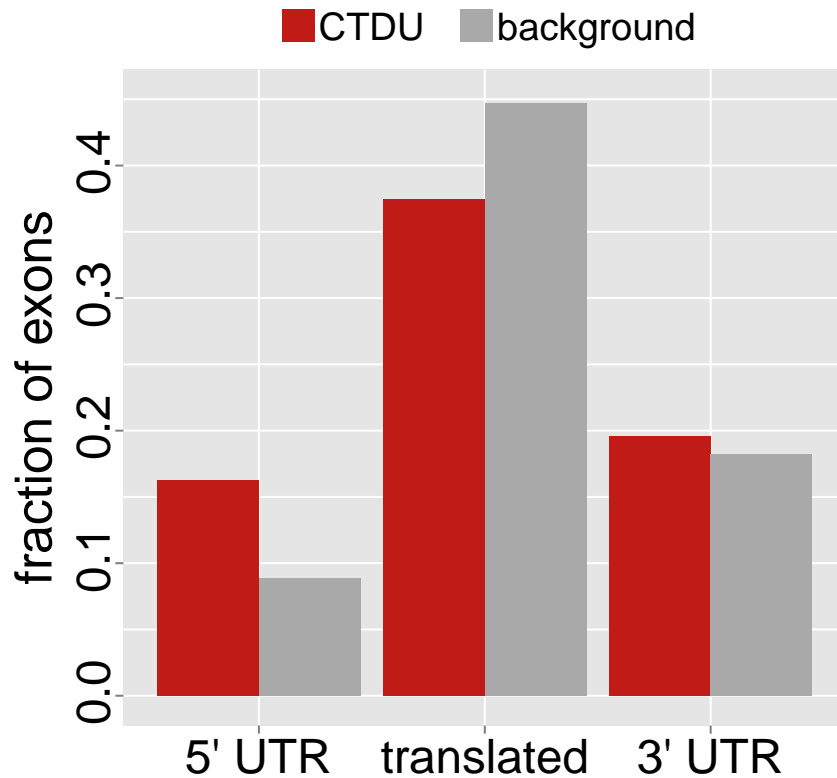

### 15.10 Figure 3E: splicing factor motif enrichments

For each of the groups we calculate the ratio of the number of predicted binding motifs for each of the splicing factors. We also calculate 95% confidence intervals.

```
load("inputs/ecstrt.RData")
load("objects/CDUT-class.RData")
load("objects/classesDefinition.RData")
goodCategories <- names(
  head( sort(table( tiDirClass ), decreasing=TRUE), 4) )
classes <- split( names( tiDirClass ), tiDirClass )

sf <- read.table(
  "inputs/sfmapTable.tab", header=TRUE, row.names=1)
```

```

sf <- split(sf,
  sapply( strsplit( rownames( sf ), "-" ), "[", 1))
rn <- sapply( strsplit( rownames(sf[[1]]), "-"), "[", 2 )
rn <- sapply( strsplit( rownames(sf[[1]]), "-"), "[", 2 )
rownames( sf[[1]] ) <- rn
rownames( sf[[2]] ) <- rn
sf <- sf[[1]] + sf[[2]]
load("objects/ctsr.RData")
load("objects/back-exon.RData")
goodCategories <- names(
  head( sort(table( tiDirClass ), decreasing=TRUE), 4) )

exons <- classes[[goodCategories[1]]]

confidences <- mclapply( goodCategories, function(x){
  exons <- classes[[x]]
  exonRows <- which( rownames(sf) %in% exons )
  backRows <- which( rownames(sf) %in% back )
  foreboot <- replicate(10000,
    colMeans( sf[sample( exonRows, replace=TRUE),] ) )
  backboot <- replicate(10000,
    colMeans( sf[sample( backRows, replace=TRUE),] ) )
  real <- log2(colMeans( sf[exonRows,] )
    / colMeans( sf[backRows,] ))
  conf <- t( sapply(
    rownames(foreboot), function(x){
      quantile( log2( foreboot[x,] / backboot[x,] ),
        c(0.05, 0.95) ) } ) )
  pval <- sapply(colnames(sf), function(x){
    wilcox.test( sf[backRows,x], sf[exonRows,x] )$p.value } )
  res <- cbind( real, conf, pval )
  return( res )
}, mc.cores=1 )

confidences <- lapply(confidences,
  function(x){
    x[-which(rownames(x) %in% c("SRp55","hnRNPAB")),] } )

df <- confidences[[1]]
num <- nrow( df )

```

```

colors2 <- brewer.pal(n=5, "Set1")
colors2 <- colors2[-2]
cols <- colors2
goodNames <- gsub("X9G8",
  "9G8",
  gsub("SF2ASF",
    "ASF/SF2",
    gsub("G\\.B", "G-B",
      gsub("H\\.F", "H/F",
        rownames(confidences[[1]]))))))
# goodorder <- 1:18
goodorder <- c(11, 16, 1, 3, 6, 10, 12, 13, 15, 2, 8, 4, 14, 7, 9, 5)

goodorder <- order( confidences[[1]][,"real"], decreasing=TRUE )
confidences2 <- lapply(confidences,
  function(x) x[goodorder,] )
confidences2 <- lapply(confidences2,
  as.data.frame )
confidences2 <- lapply( seq(along=confidences2),
  function(x) cbind(confidences2[[x]], class=x) )
confidences2 <- lapply( seq(along=confidences2),
  function(x) cbind(confidences2[[x]],
    splicingFactor=goodNames[goodorder] ))
confidences2 <- lapply( 1:length(confidences2),
  function(x) cbind(confidences2[[x]],
    color=as.character(cols[x])) )

confidences2 <- do.call(rbind, confidences2)
confidences2$splicingFactor <- factor(
  confidences2$splicingFactor, levels=goodNames[goodorder])

```

After calculating what is necessary and doing some data ordering and formating, we can finally make a plot with this results:

```

prepanel.ci <- function(x, y, ly, uy,
  subscripts, ...)
{
  y <- as.numeric(y)
  ly <- as.numeric(ly[subscripts])

```

```

    uy <- as.numeric(uy[subscripts])
    list(ylim = range(y, uy, ly, finite = TRUE))
}

panel.ci <- function(x, y, ly, uy, cols,
  subscripts, pch = 16, ...)
{
  x <- as.numeric(x)
  y <- as.numeric(y)
  ly <- as.numeric(ly[subscripts])
  uy <- as.numeric(uy[subscripts])
  colorsA <- cols[subscripts]
  panel.arrows(x, ly, x, uy, col = colorsA,
length = 0, unit = "native",
angle = 90, code = 3, lwd=3)
  panel.xyplot(x, y, pch = pch, ...)
}

trellis.par.set(superpose.symbol=
  list(col=as.character(unique(confidences2$color))))
with( confidences2,
  dotplot( real ~ splicingFactor|class,
  index.cond=list(c(2, 4, 3, 1)),
  uy='95%',
  ly='5%',
  cols=as.character(color),
  groups=class,
  prepanel=prepanel.ci,
  panel=function(x, y, ...){
    panel.abline(v = unique( as.numeric(x) ), col="#D8BFD870" )
    panel.abline( h=0, col="grey", lwd=2)
    panel.superpose(x, y, ... )
  },
  panel.groups=panel.ci,
  pch=16,
  strip=FALSE,
  layout=c(1, 4),
  between=list(y=0.5),
  scales=list(x=list(rot=90, cex=1.2), y=list(cex=1.2)),
  ylab=list(

```



```

label="ratio of number of motifs (log2)", cex=1.2)
))

```

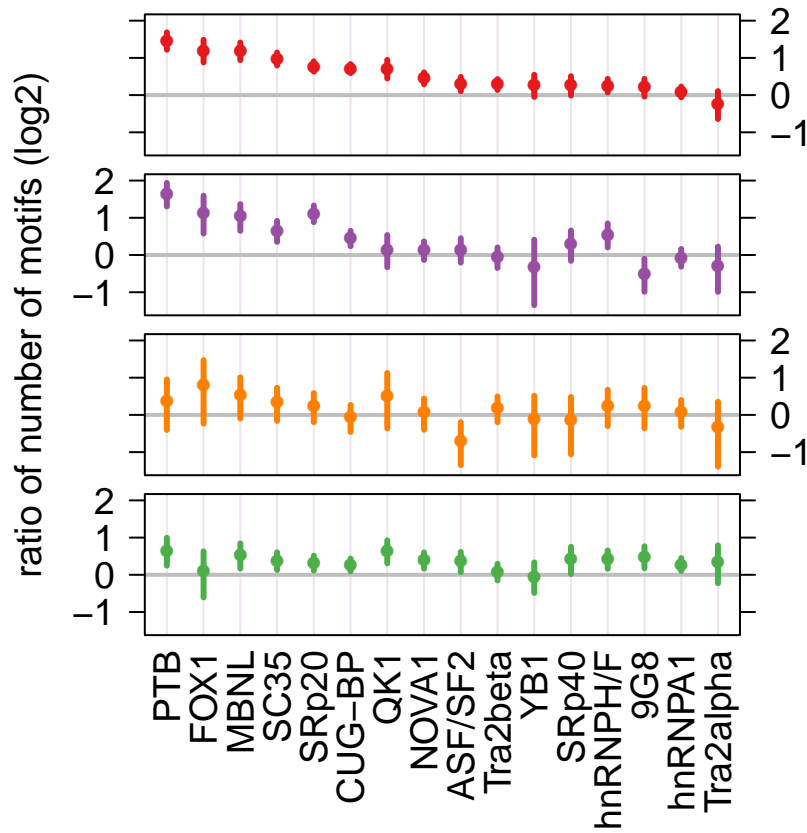

## 16 Session Info

```
sessionInfo()
```

```
R Under development (unstable) (2013-02-06 r61845)
Platform: x86_64-unknown-linux-gnu (64-bit)
```

```
locale:
```

```
[1] LC_CTYPE=en_US.UTF-8      LC_NUMERIC=C
```

```
[3] LC_TIME=en_US.UTF-8      LC_COLLATE=en_US.UTF-8
[5] LC_MONETARY=en_US.UTF-8  LC_MESSAGES=en_US.UTF-8
[7] LC_PAPER=C                LC_NAME=C
[9] LC_ADDRESS=C              LC_TELEPHONE=C
[11] LC_MEASUREMENT=en_US.UTF-8 LC_IDENTIFICATION=C
```

attached base packages:

```
[1] grid      parallel  stats      graphics  grDevices  utils      datasets
[8] methods  base
```

other attached packages:

```
[1] GenomicFeatures_1.12.2 GenomicRanges_1.12.4 IRanges_1.18.1
[4] ggplot2_0.9.3.1       Vennerable_2.2       xtable_1.7-1
[7] reshape_0.8.4         plyr_1.8              RBGL_1.36.2
[10] graph_1.38.2          gplots_2.11.3        KernSmooth_2.23-10
[13] caTools_1.14          gdata_2.13.2         plotrix_3.4-8
[16] geneplotter_1.38.0    annotate_1.38.0       AnnotationDbi_1.22.6
[19] MatchIt_2.4-21        DESeq_1.12.0         locfit_1.5-9.1
[22] latticeExtra_0.6-24   lattice_0.20-15      LSD_2.5
[25] ellipse_0.3-8         schoolmath_0.4       colorRamps_2.3
[28] RColorBrewer_1.0-5    gtools_3.0.0         MASS_7.3-27
[31] genefilter_1.42.0     abind_1.4-0          multicore_0.1-7
[34] statmod_1.4.17        DEXSeq_1.6.0         Biobase_2.20.1
[37] BiocGenerics_0.6.0    BiocInstaller_1.10.2
```

loaded via a namespace (and not attached):

```
[1] biomaRt_2.16.0        Biostrings_2.28.0    bitops_1.0-5         BSgenome_1.28.0
[5] colorspace_1.2-2     DBI_0.2-7            dichromat_2.0-0      digest_0.6.3
[9] gtable_0.1.2         hwriter_1.3          labeling_0.2         munsell_0.4
[13] proto_0.3-10         RCurl_1.95-4.1       reshape2_1.2.2      Rsamtools_1.12.3
[17] RSQLite_0.11.4       rtracklayer_1.20.2   scales_0.2.3         splines_3.0.0
[21] stats4_3.0.0         stringr_0.6.2        survival_2.37-4      tools_3.0.0
[25] XML_3.98-1.1         zlibbioc_1.6.0
```

## 17 All genes with strictly CTDU exons.

In the next pages, the heatmap plots (as in Figure 1) of each gene that contained strictly CTDU exons are presented. Check Figure 1 for legends.



ENSG0000003989

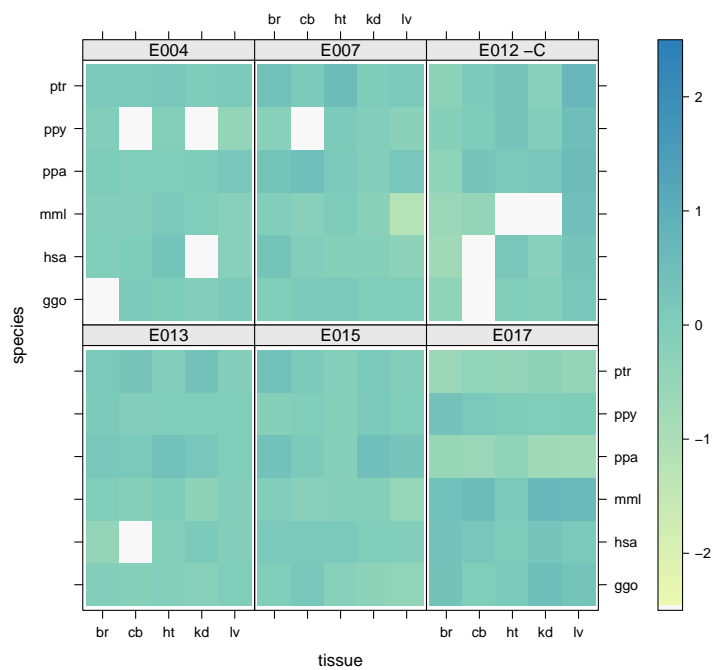



ENSG0000005379

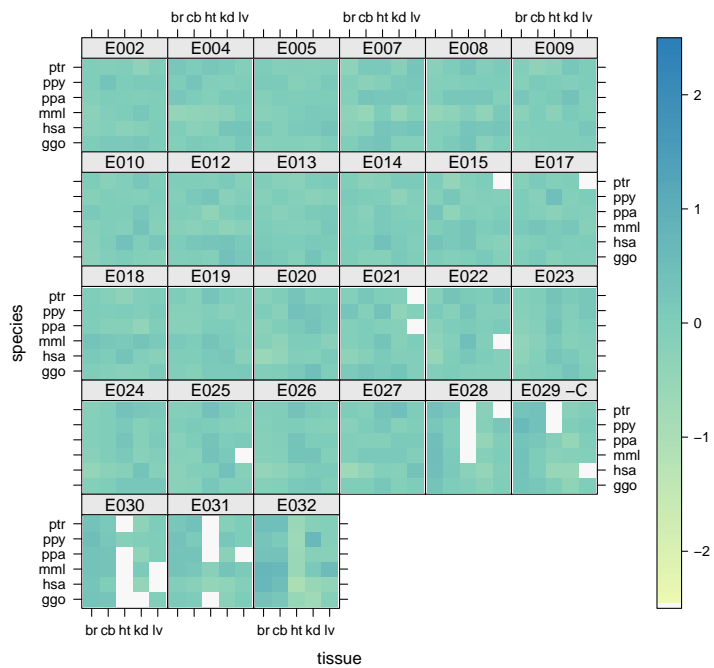

ENSG0000007237

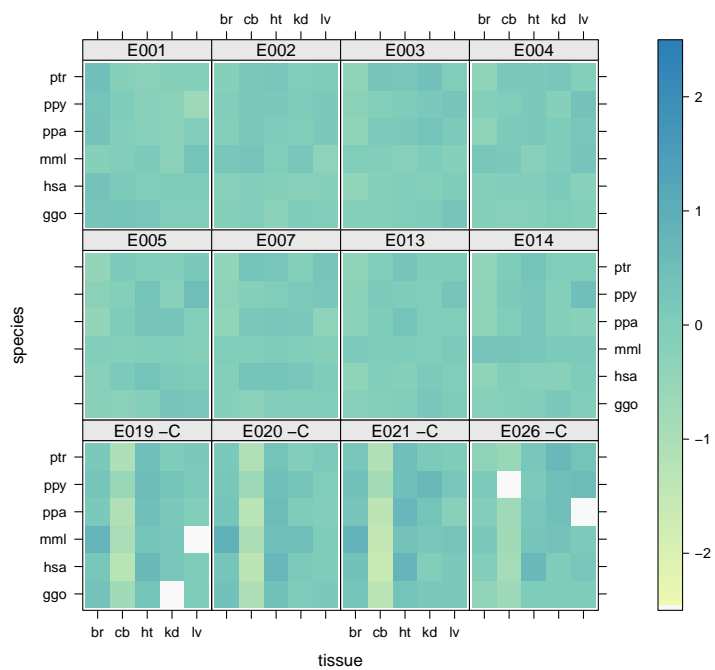





ENSG0000009307

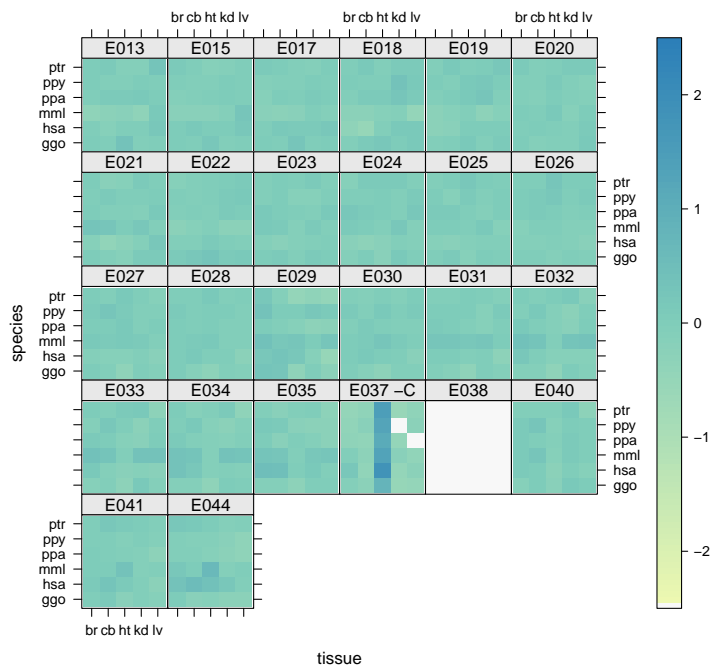

ENSG0000009724

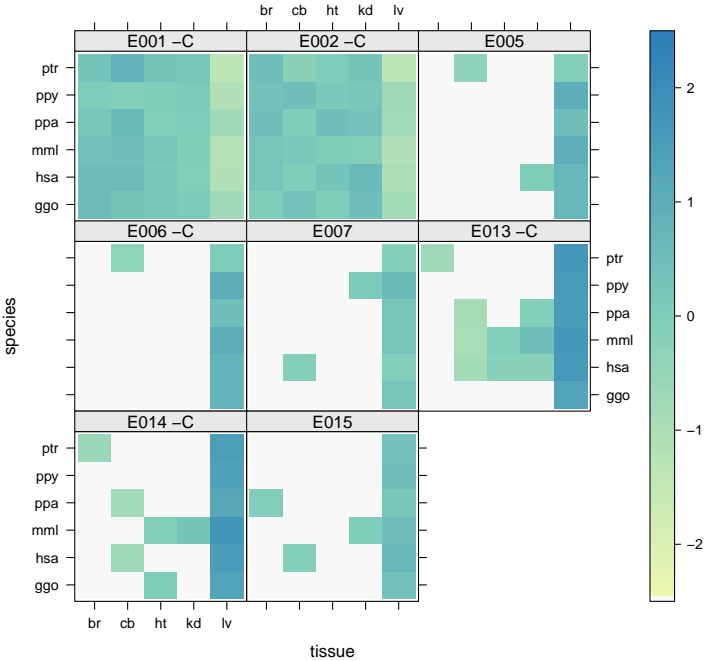



ENSG00000010295

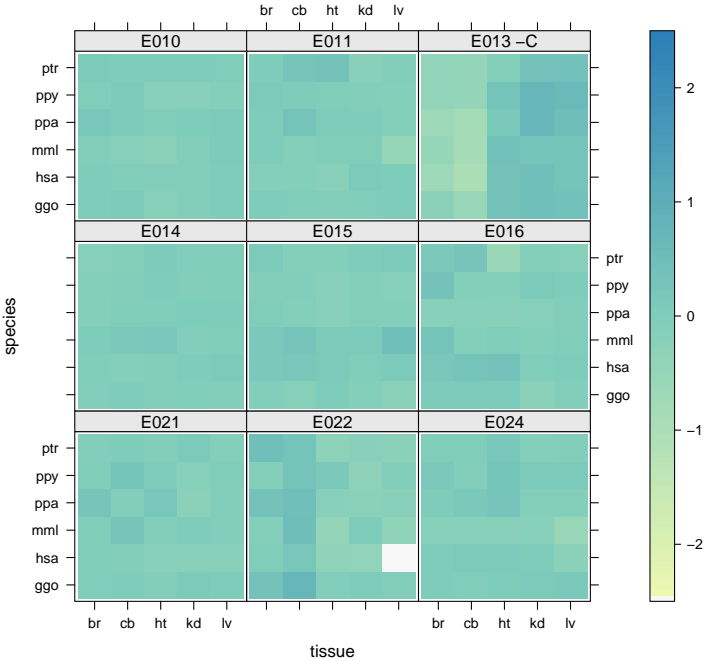





ENSG0000019144

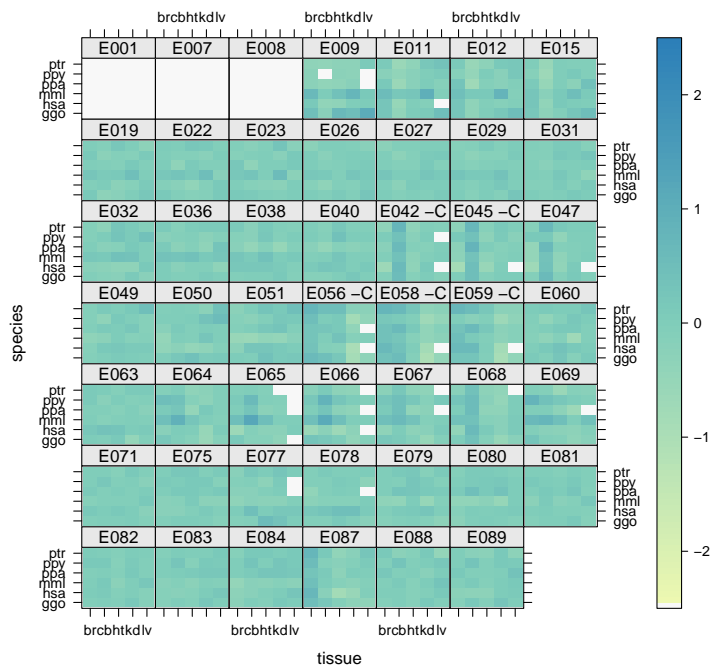

ENSG00000020129

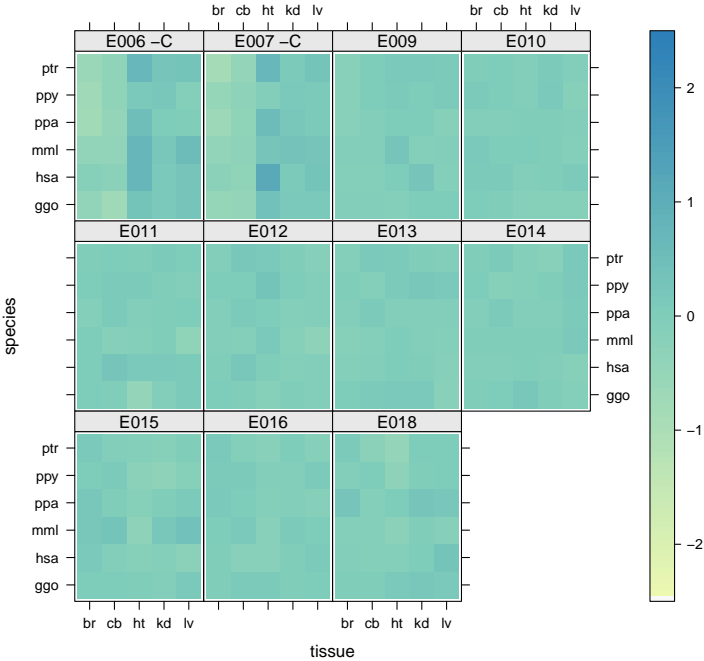





ENSG0000028203

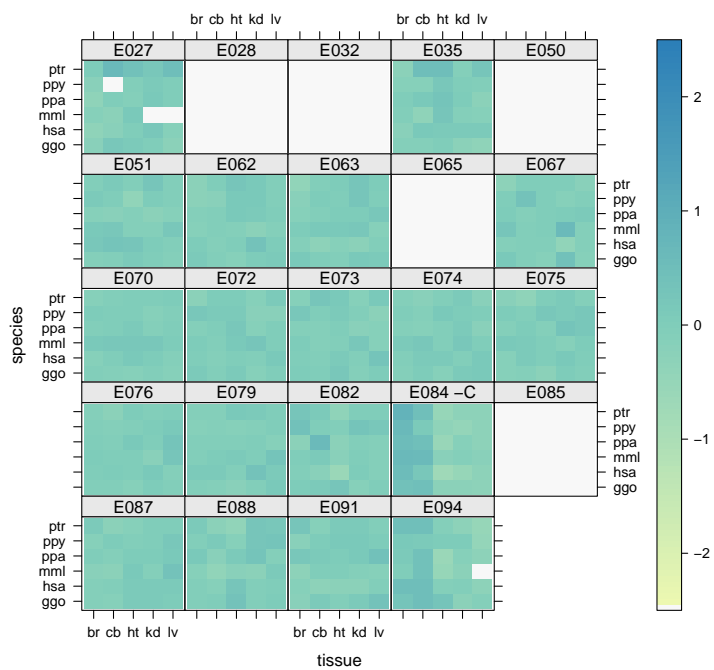

ENSG0000029534

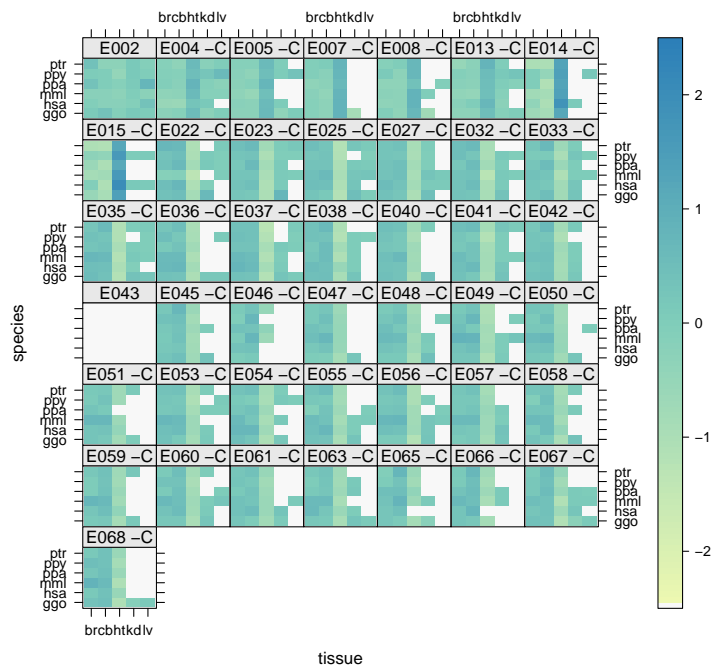

ENSG0000032219

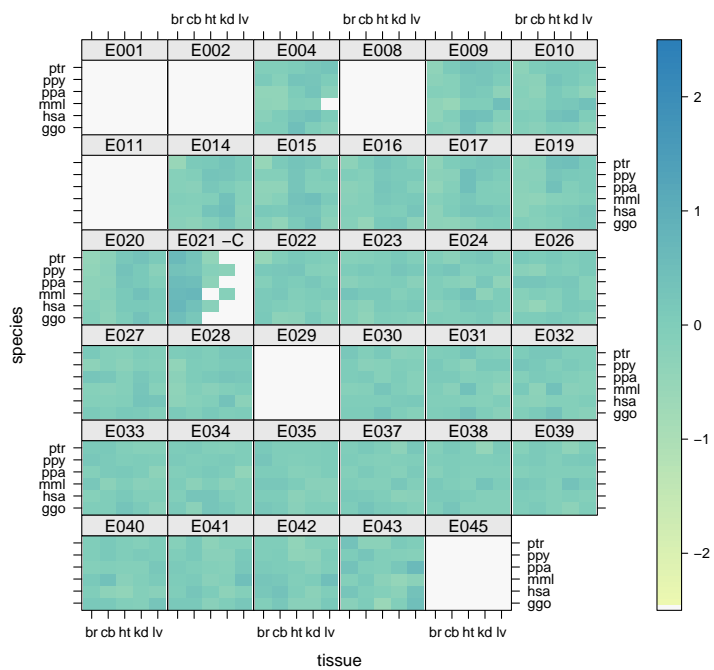











ENSG0000039123

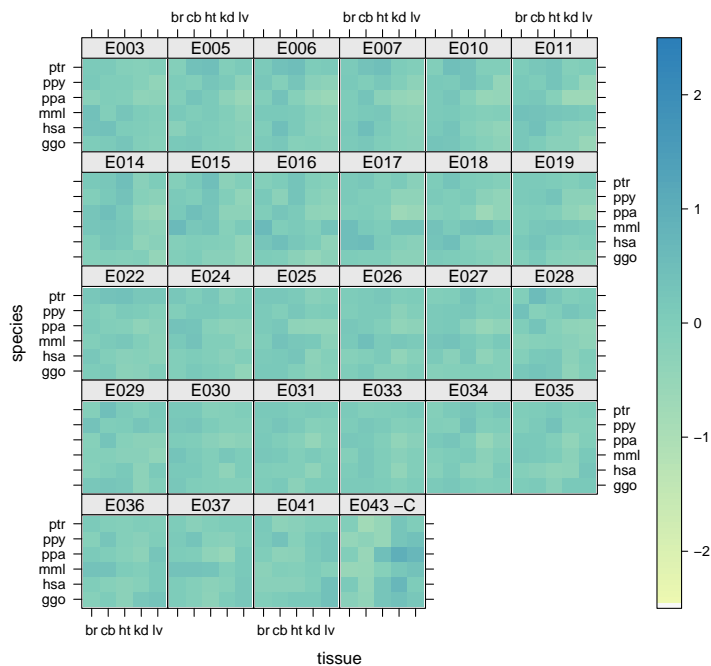

ENSG0000040199

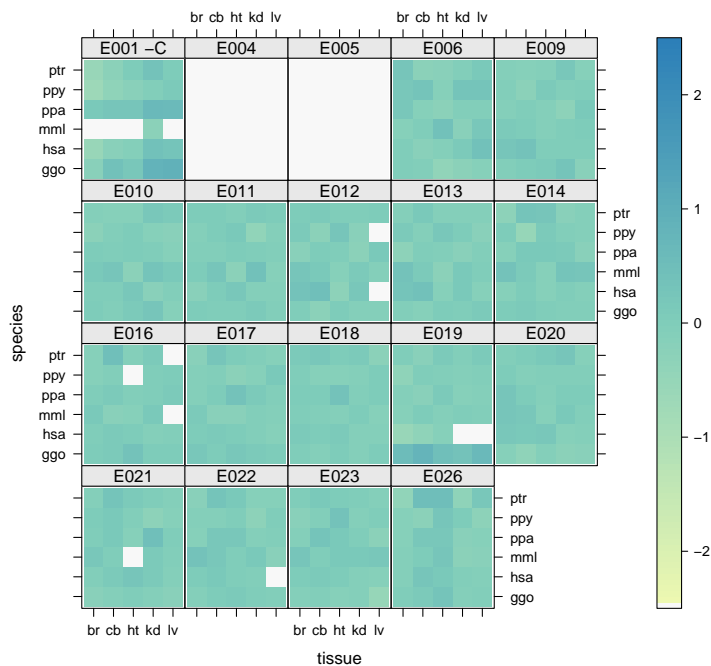

ENSG0000040933

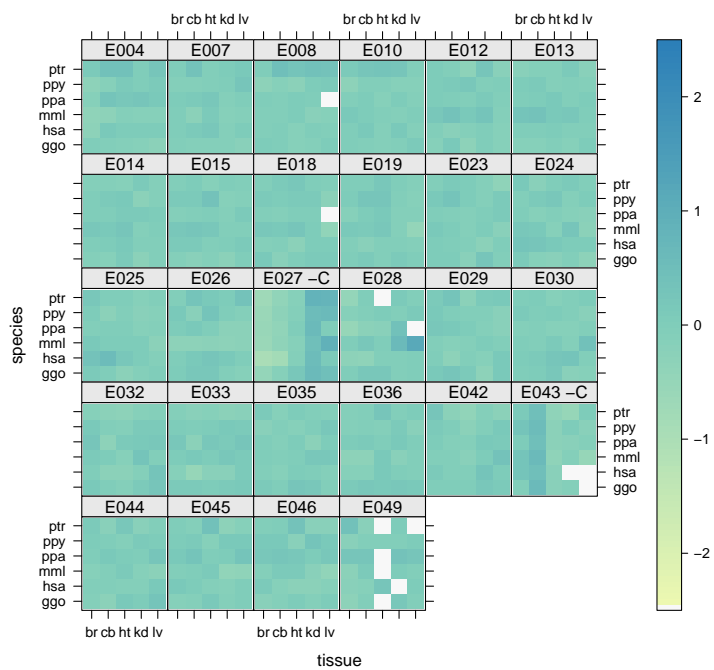







ENSG00000047457

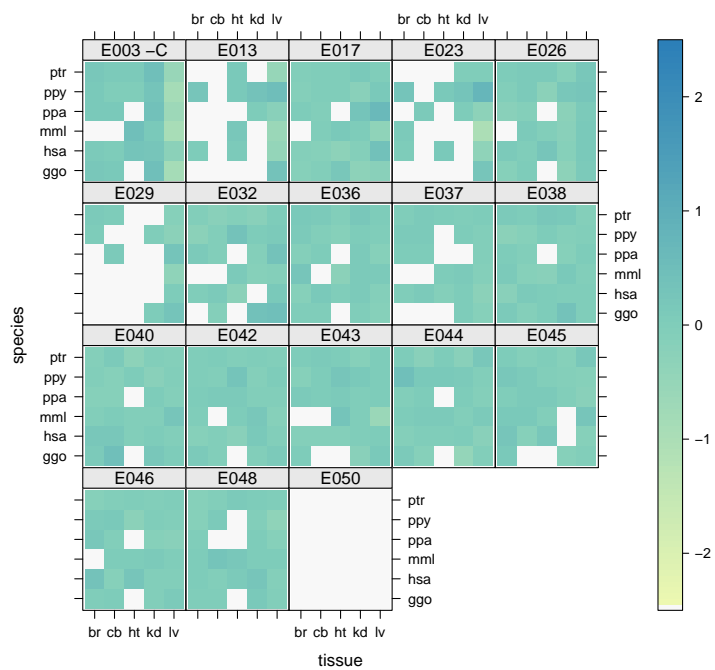







ENSG00000048740

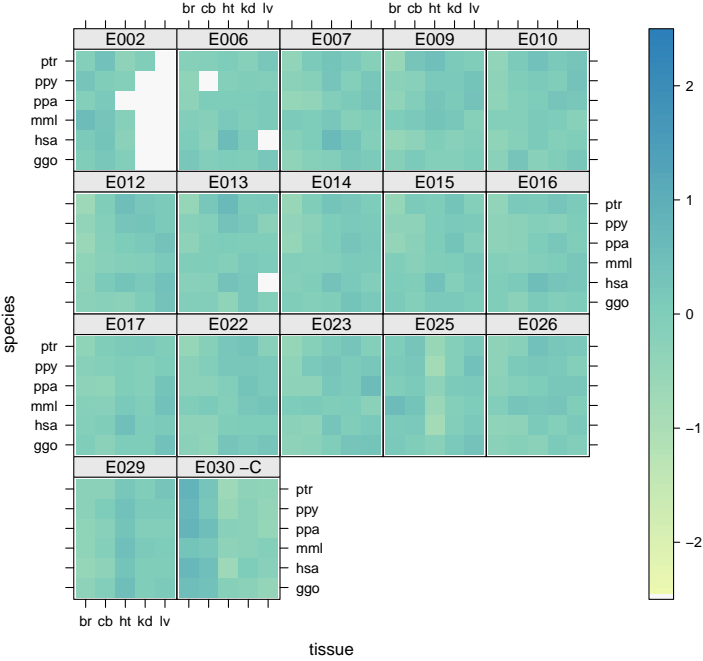

ENSG0000048991

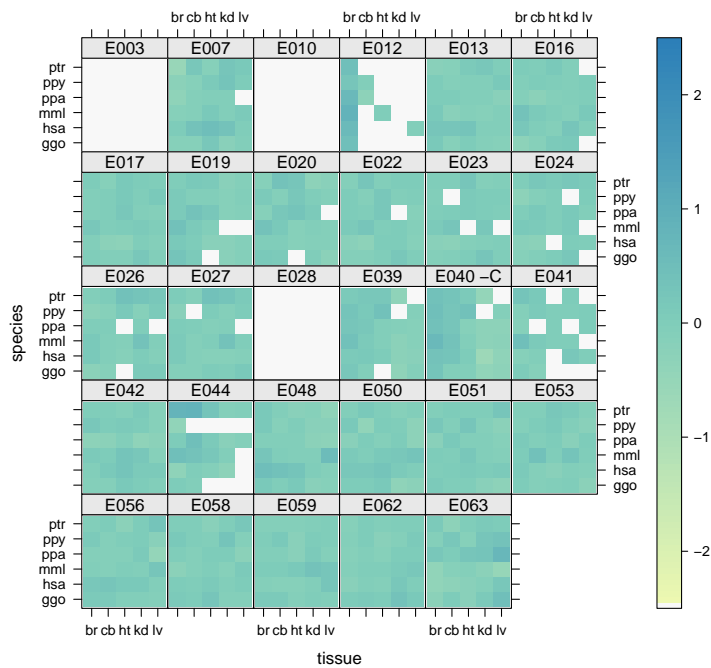





ENSG0000052126

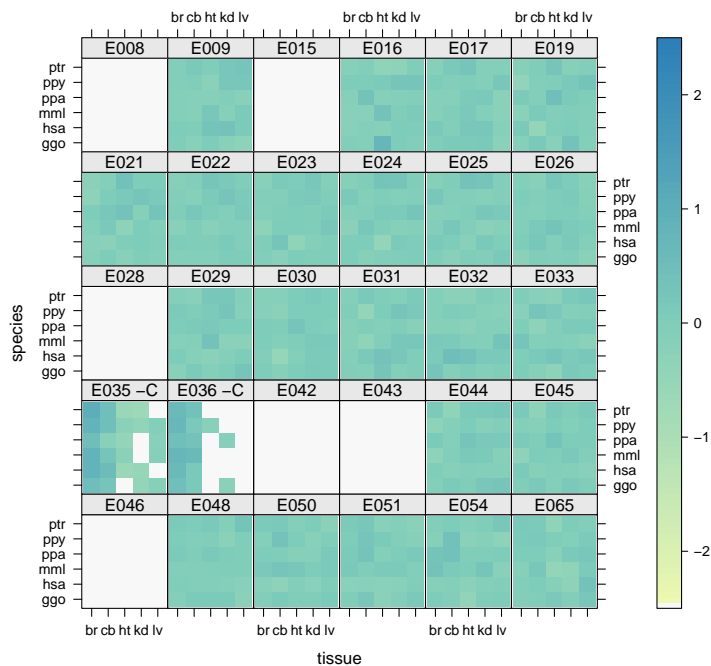

ENSG0000052841

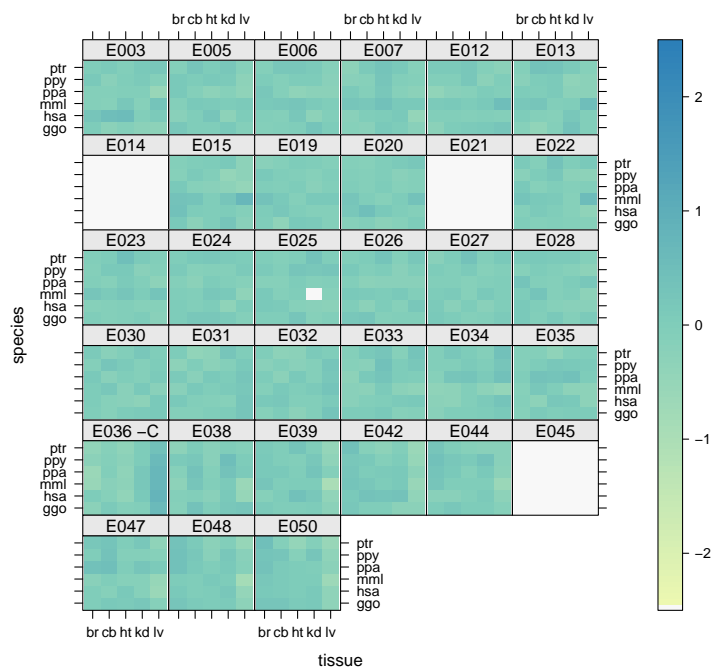

ENSG0000054282

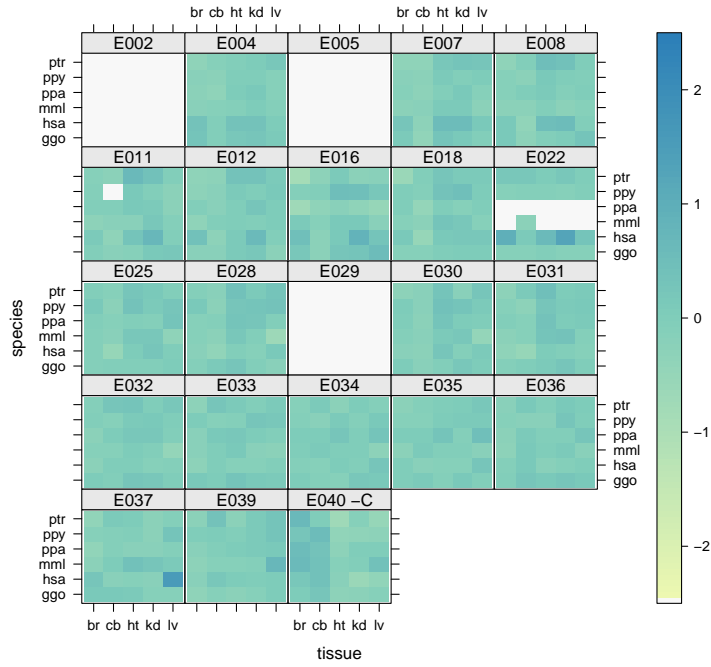





ENSG0000054938

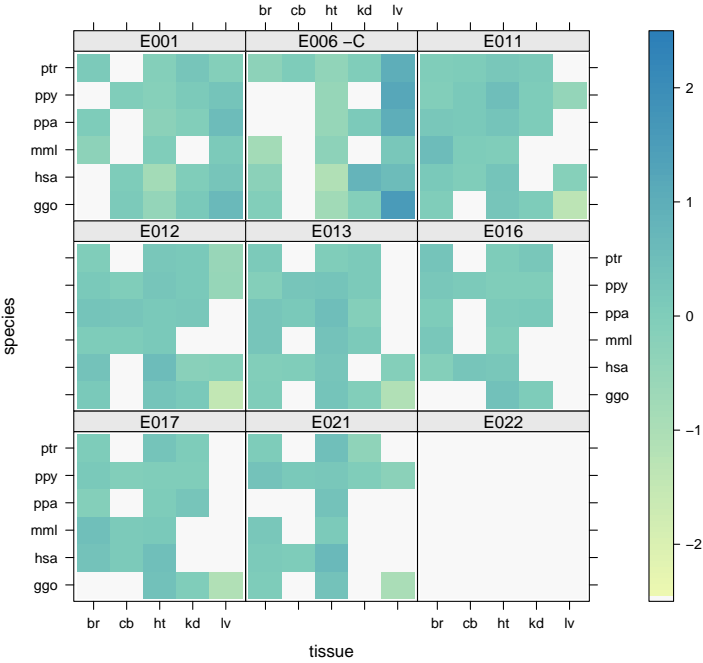

ENSG0000056972

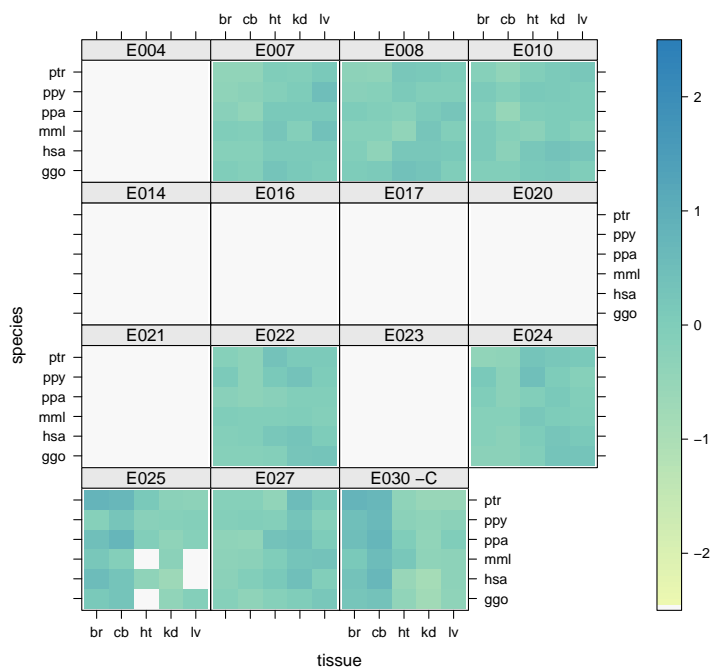



ENSG0000058668

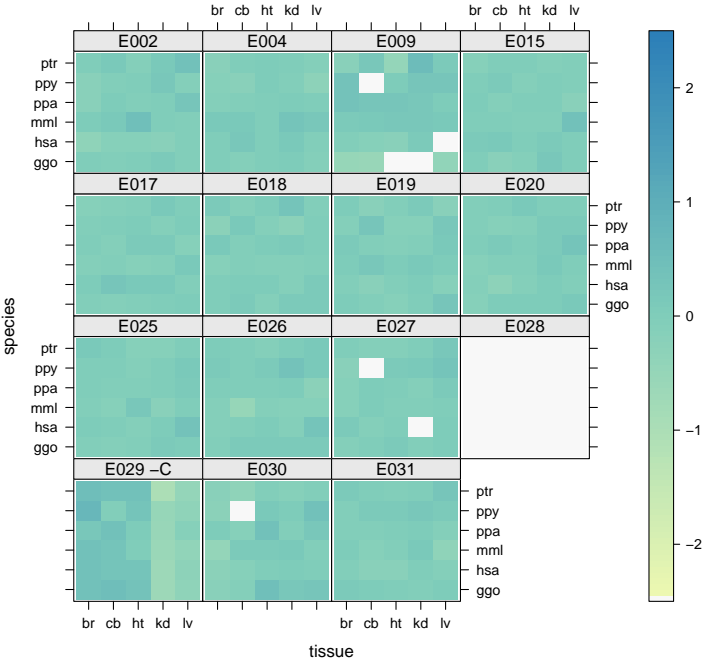



ENSG0000060237

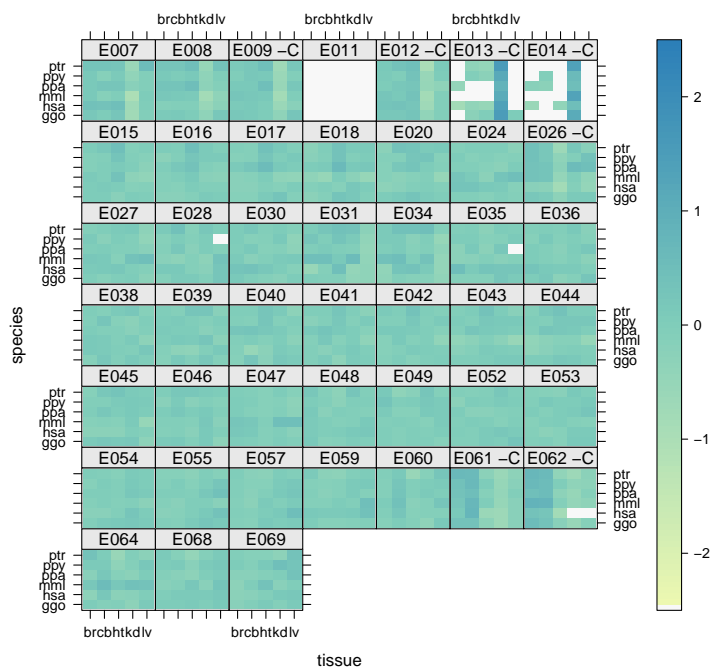





ENSG0000064042

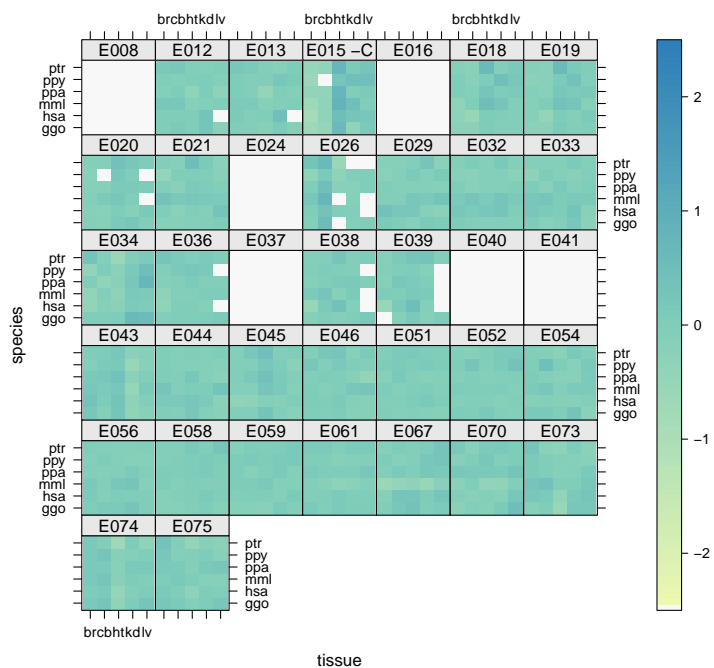

ENSG0000064393

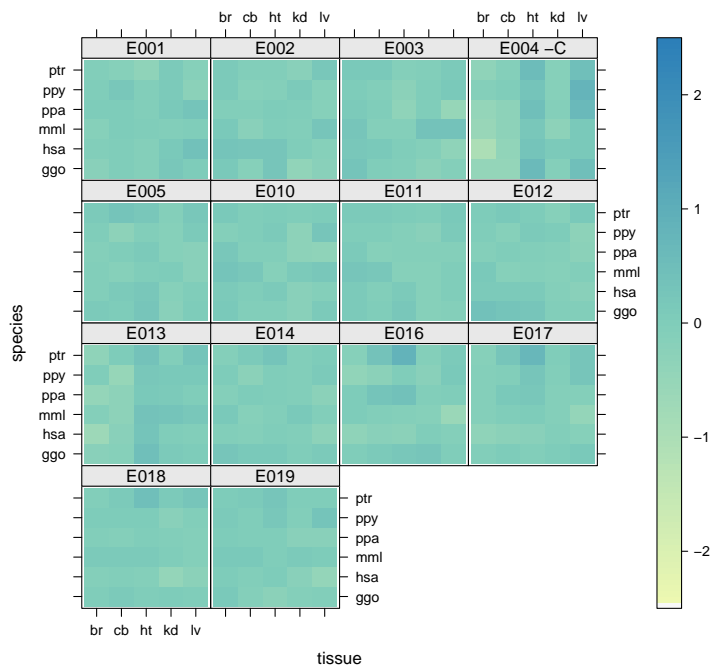









ENSG0000065882

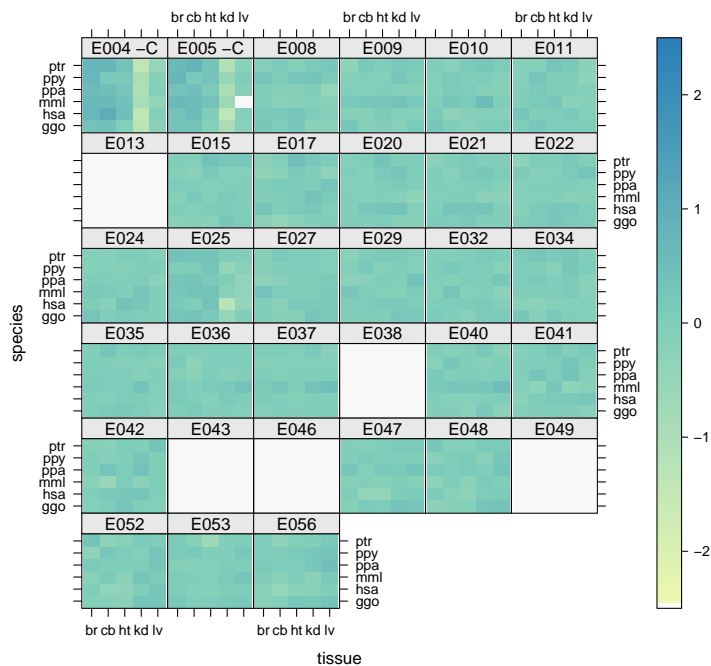





ENSG0000066248

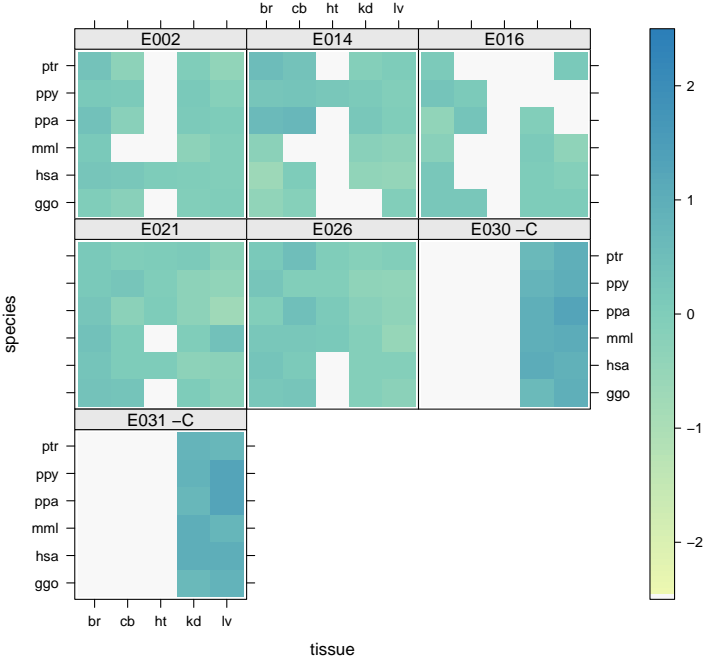

ENSG0000066422

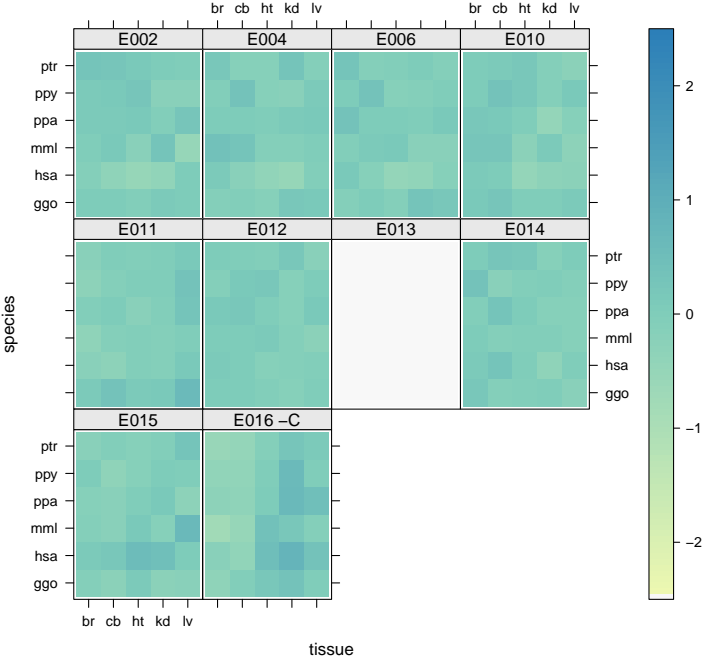

ENSG00000066468

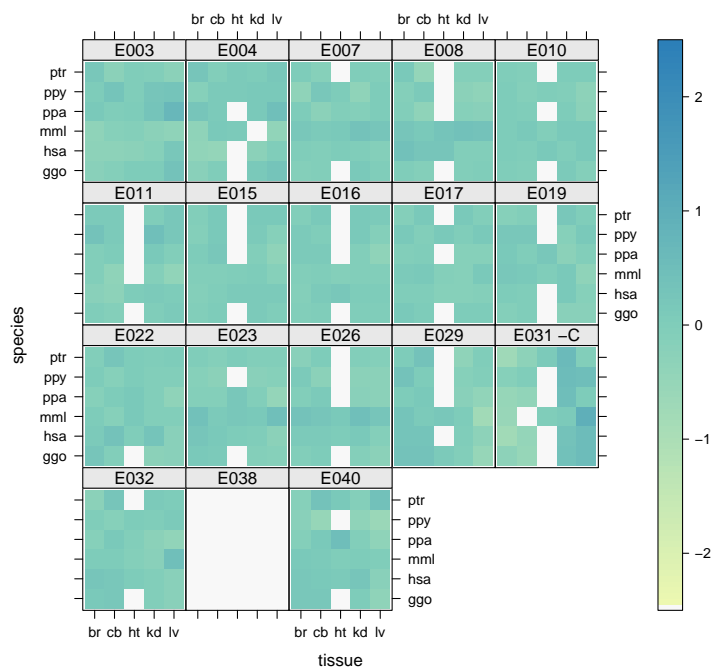



ENSG0000067606

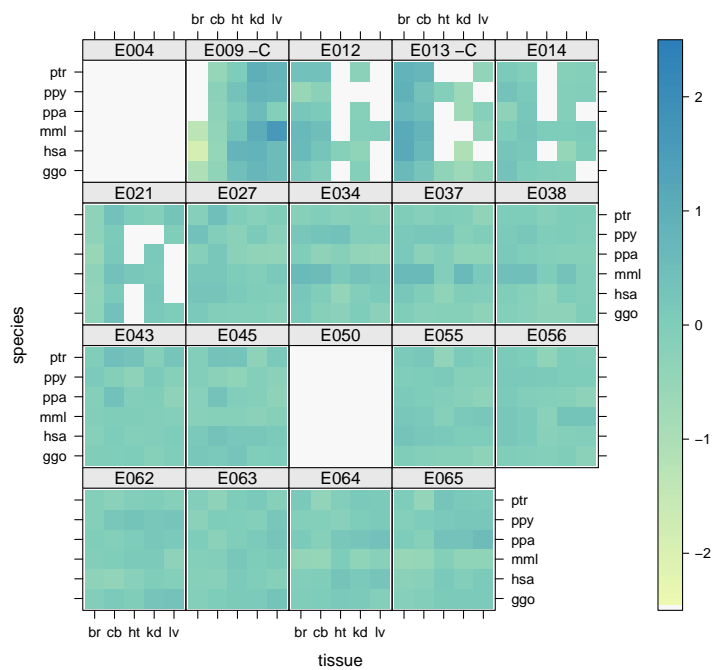



ENSG0000070081

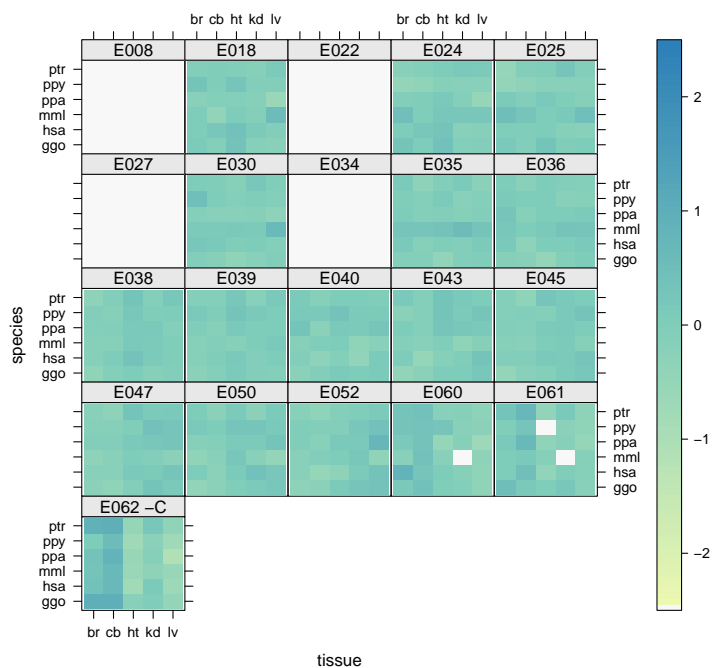

ENSG00000070495

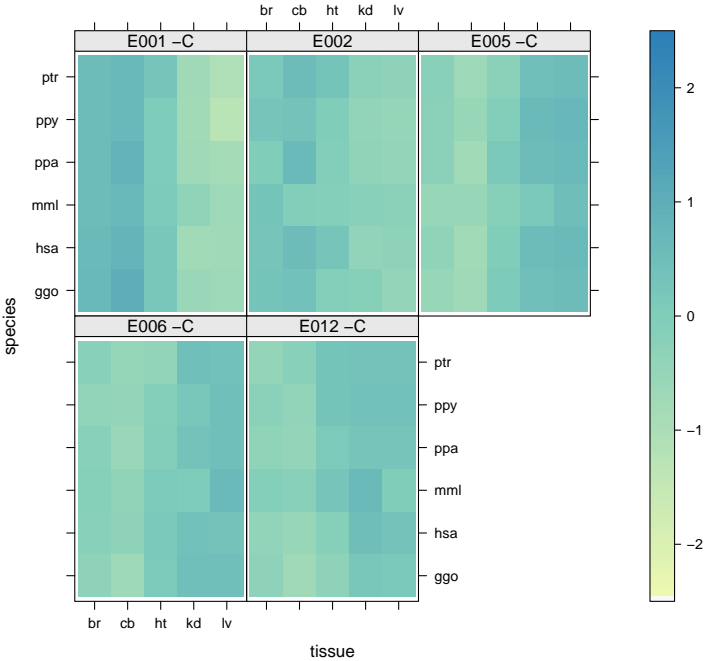



ENSG0000070808

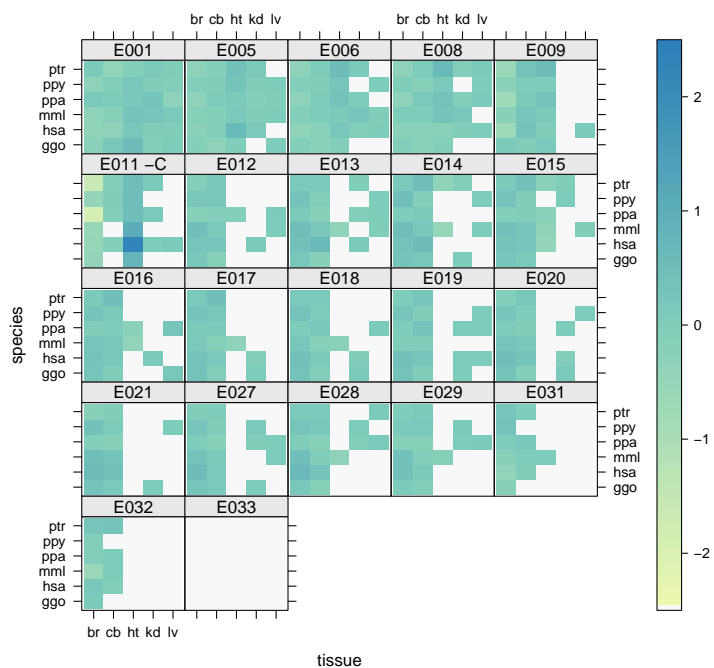

ENSG0000070961

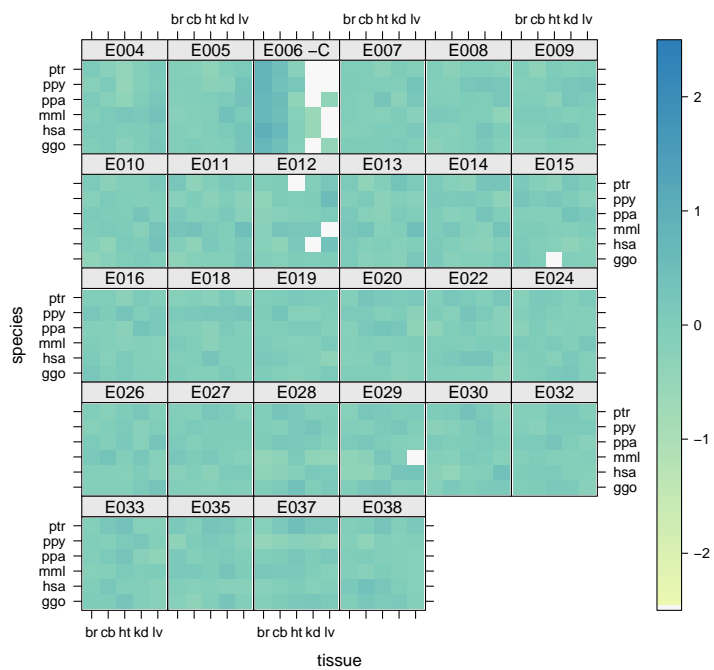



ENSG00000072201

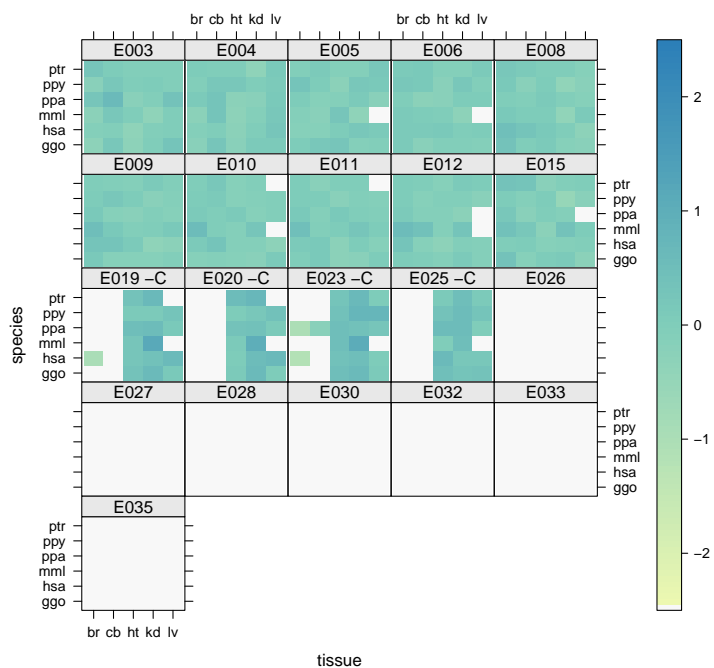



ENSG0000073060

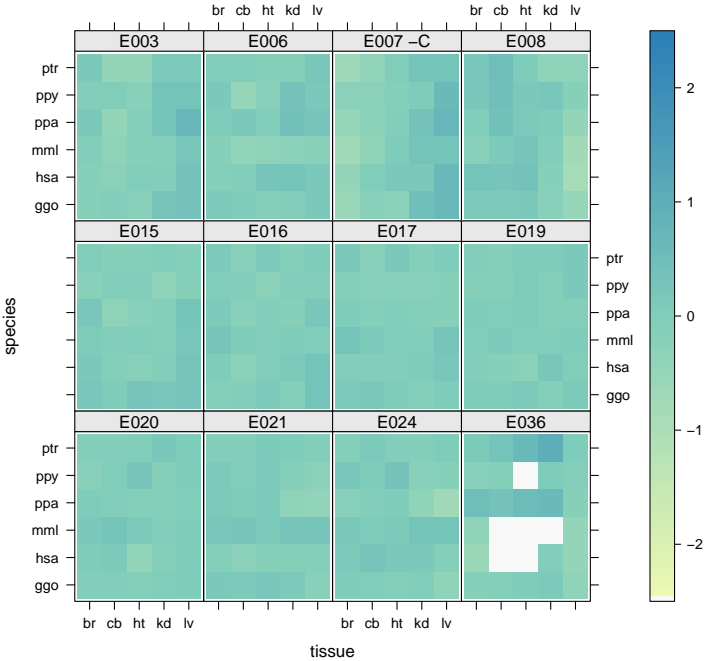

ENSG0000073711

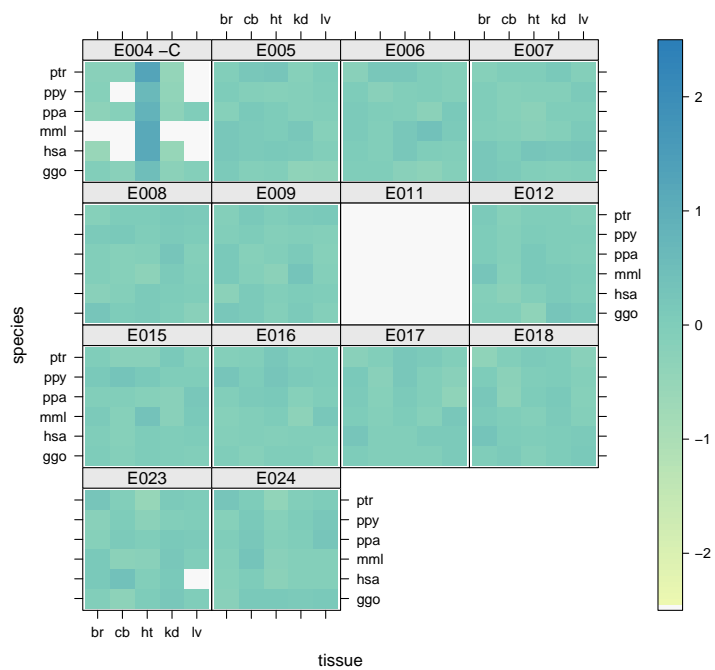

ENSG0000073849

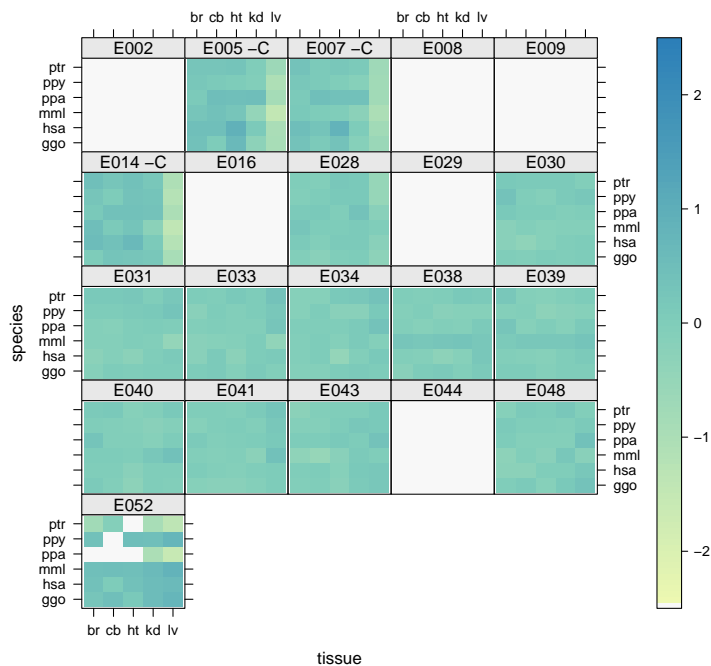





ENSG0000074054

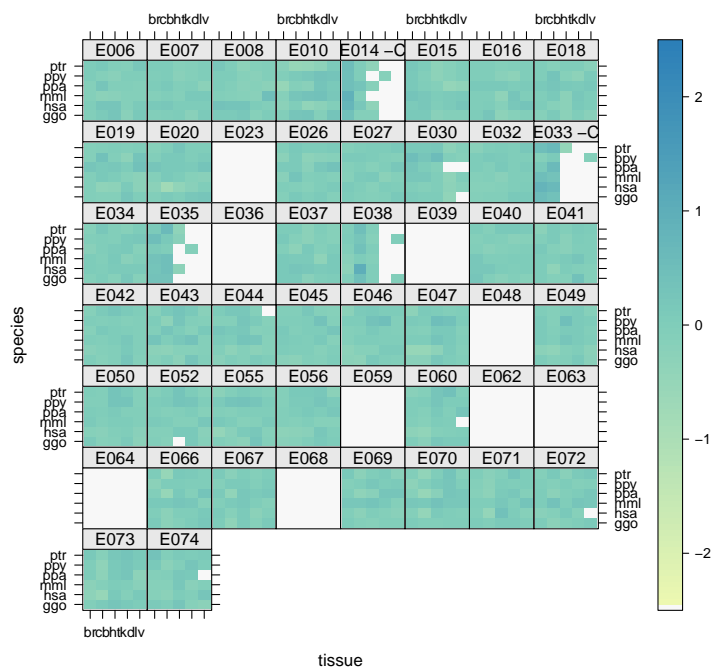









ENSG00000075891

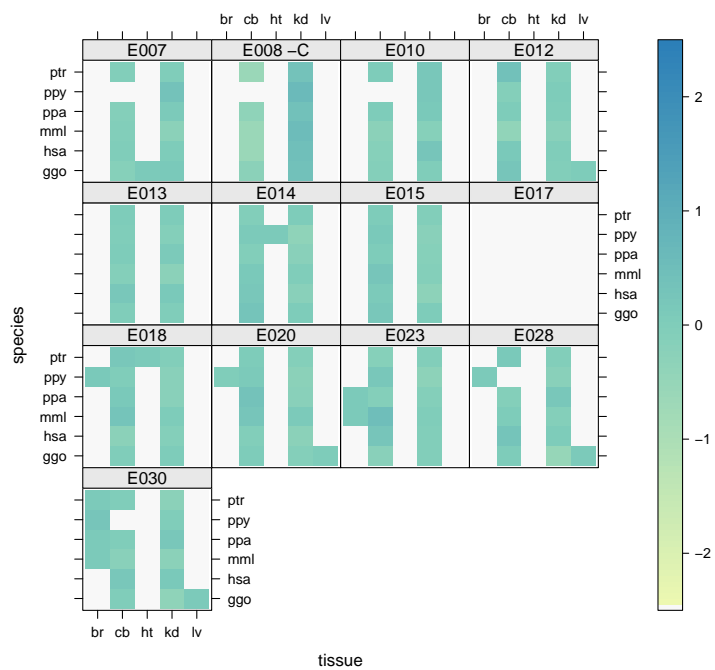

ENSG0000076356

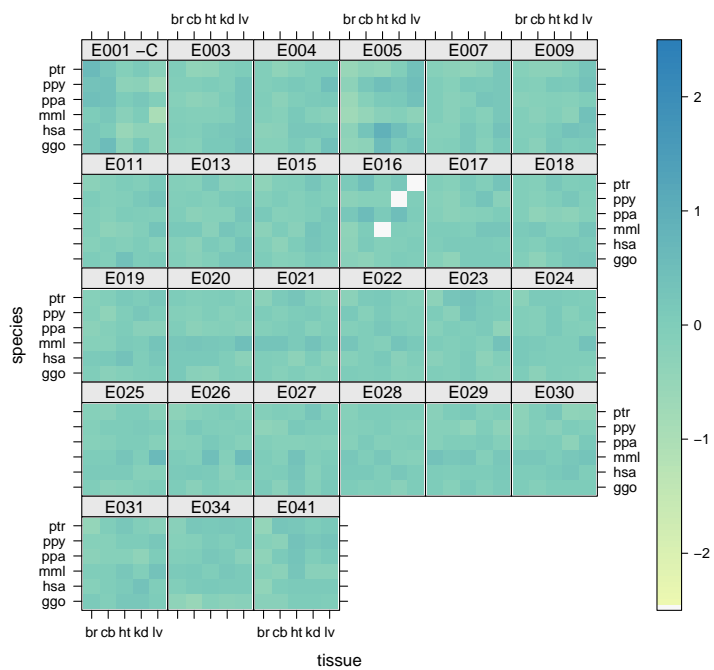



ENSG0000077380

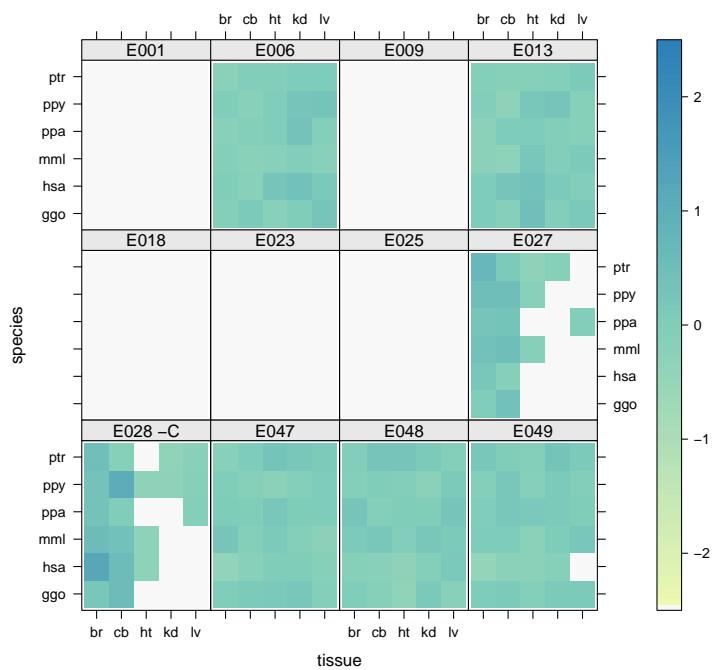

ENSG0000077522

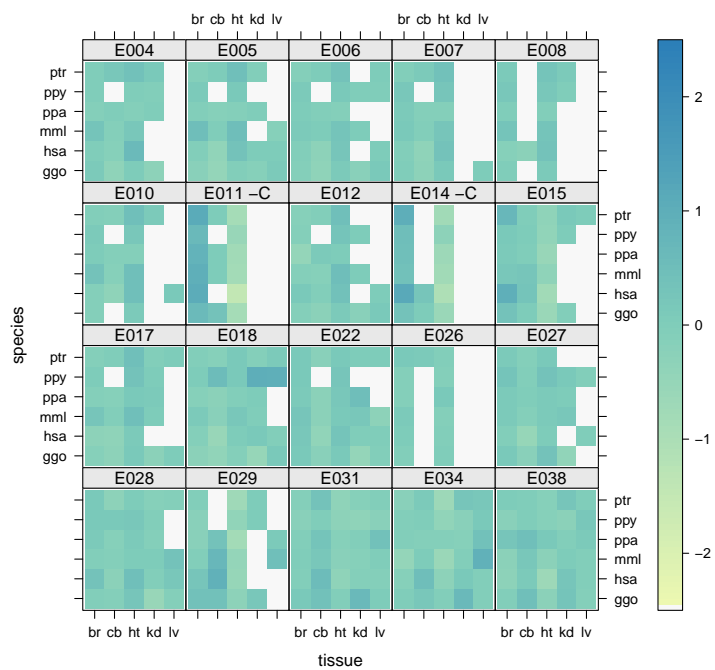











ENSG00000079805

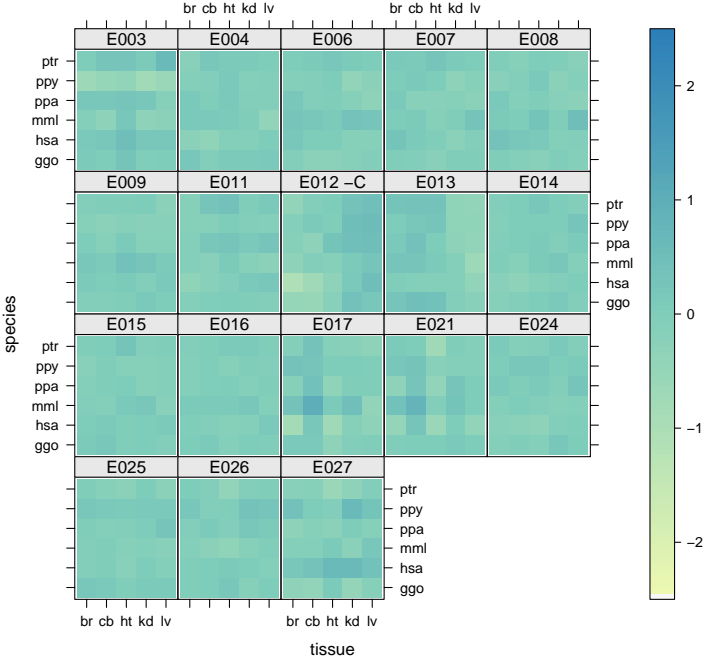



ENSG0000079819

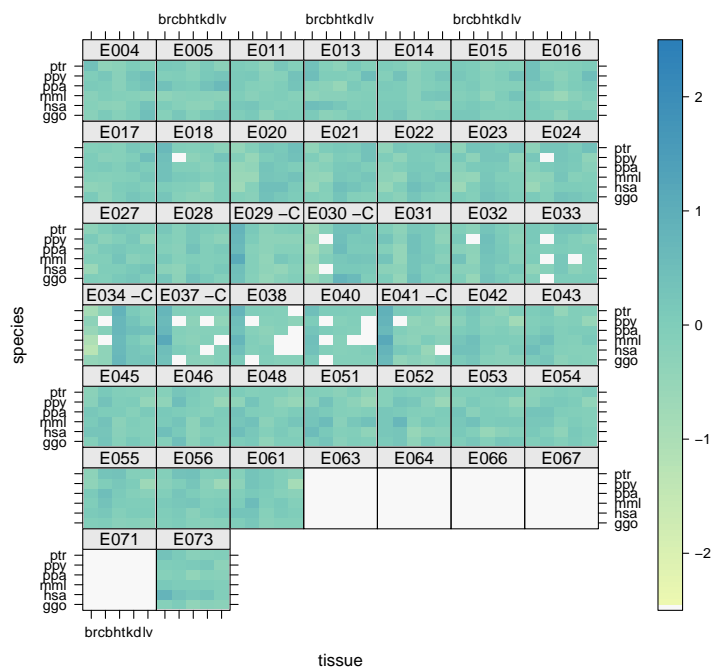

ENSG0000079841

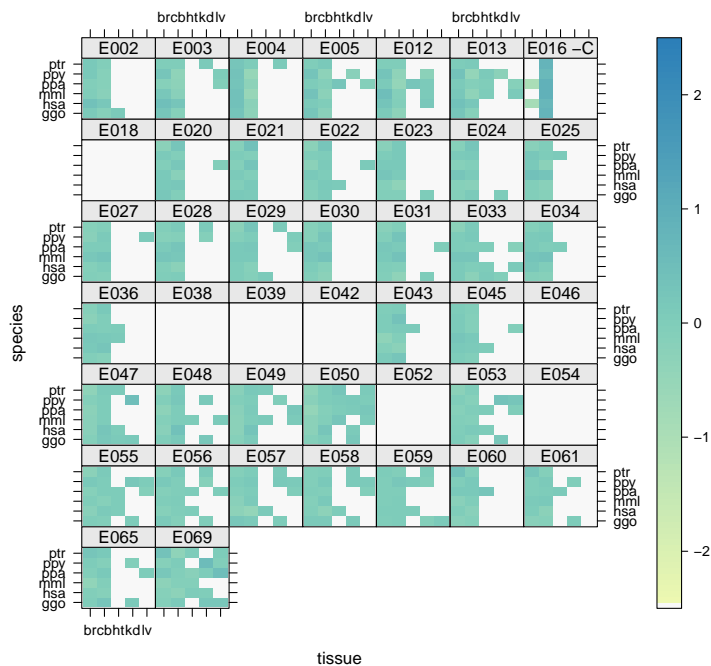

ENSG0000080493

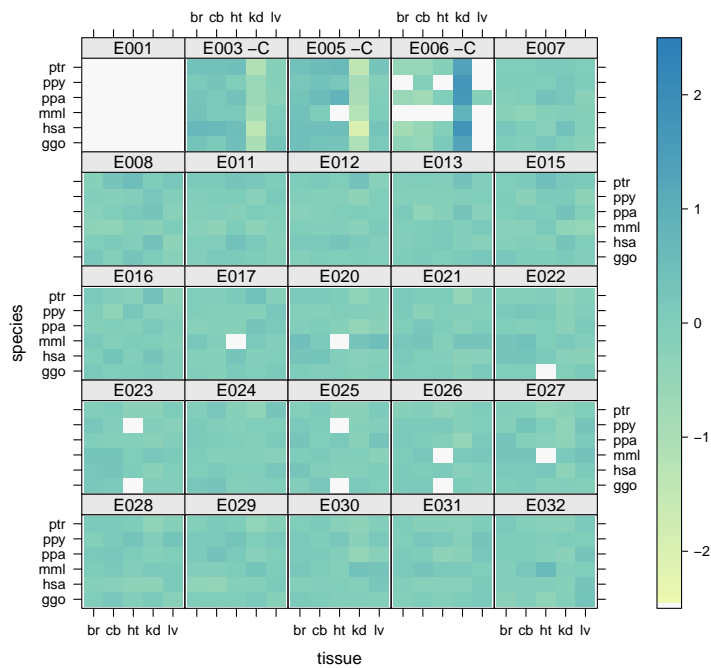



ENSG0000081059

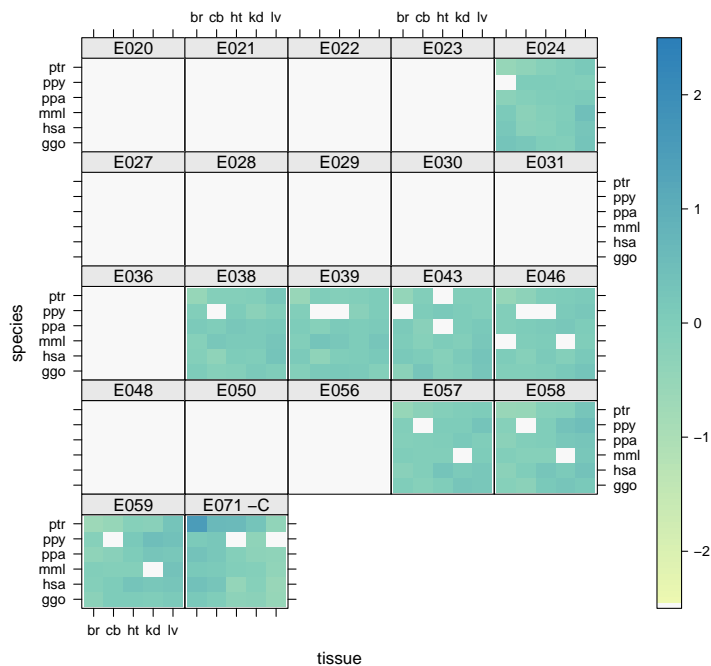

ENSG0000081181

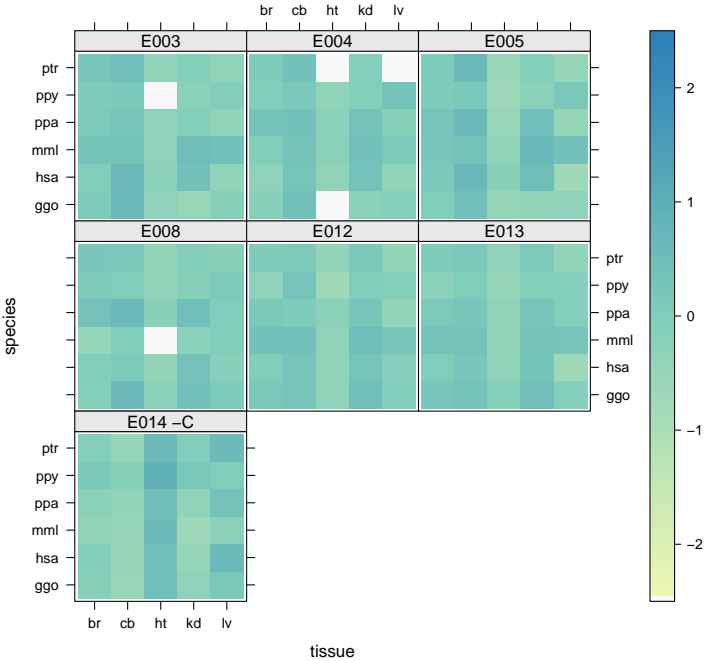













ENSG0000084234

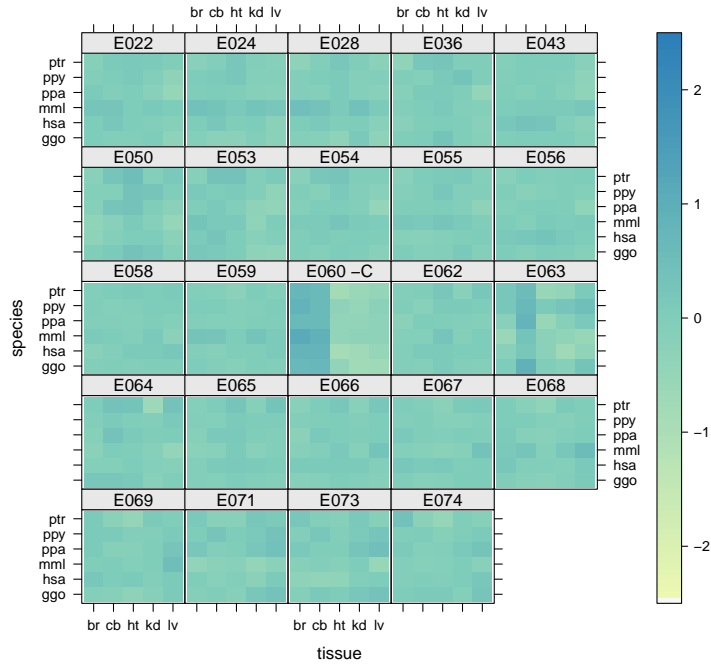

ENSG0000084693

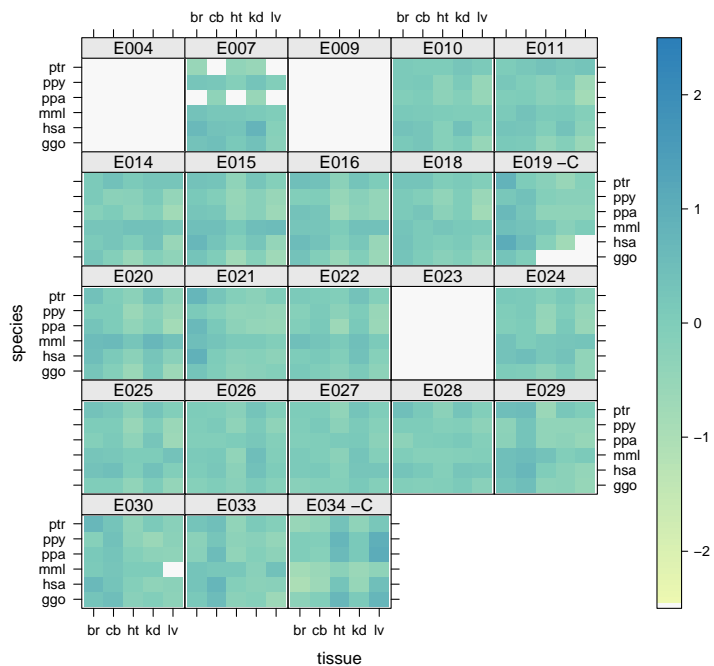

ENSG0000084764

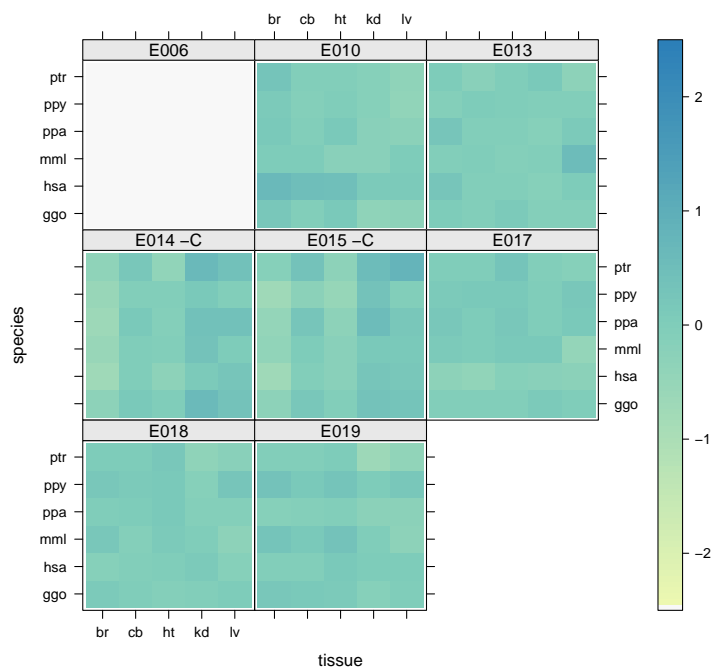

ENSG00000085832

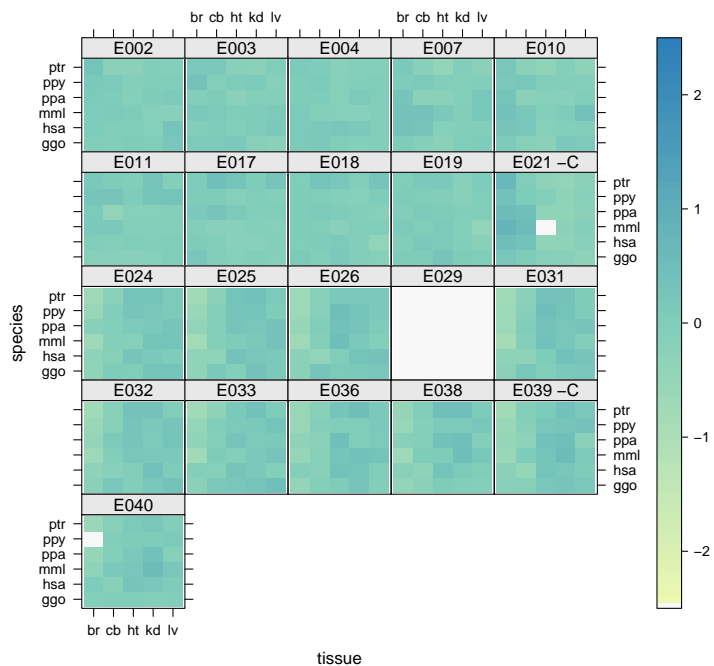

ENSG0000085871

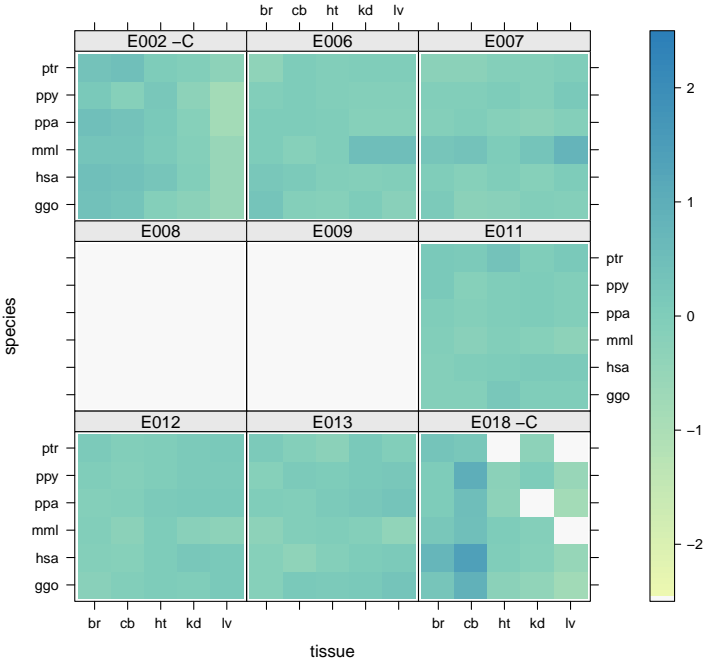



ENSG0000085978

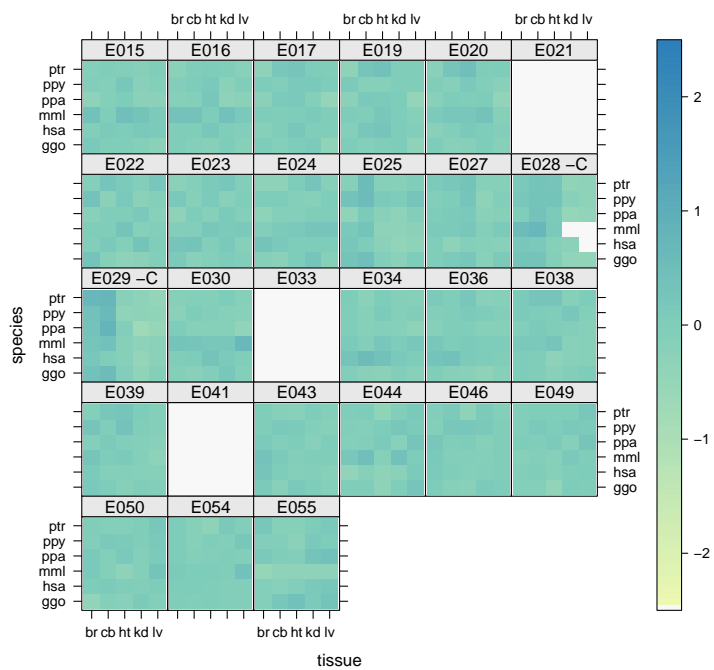

ENSG0000085998

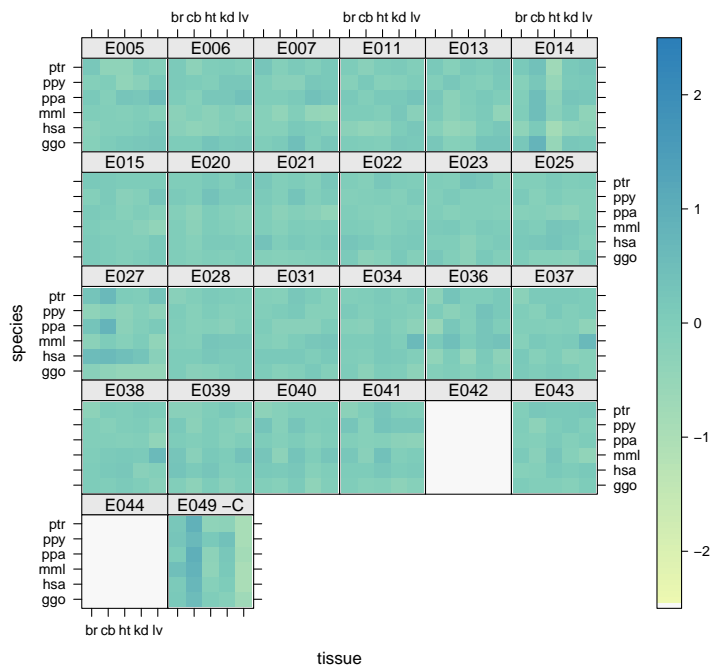



ENSG0000087274

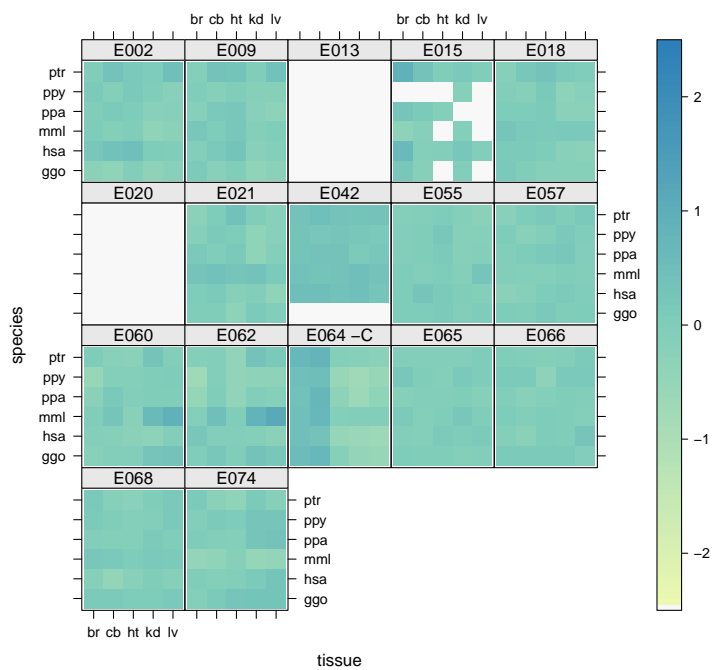



ENSG0000087495

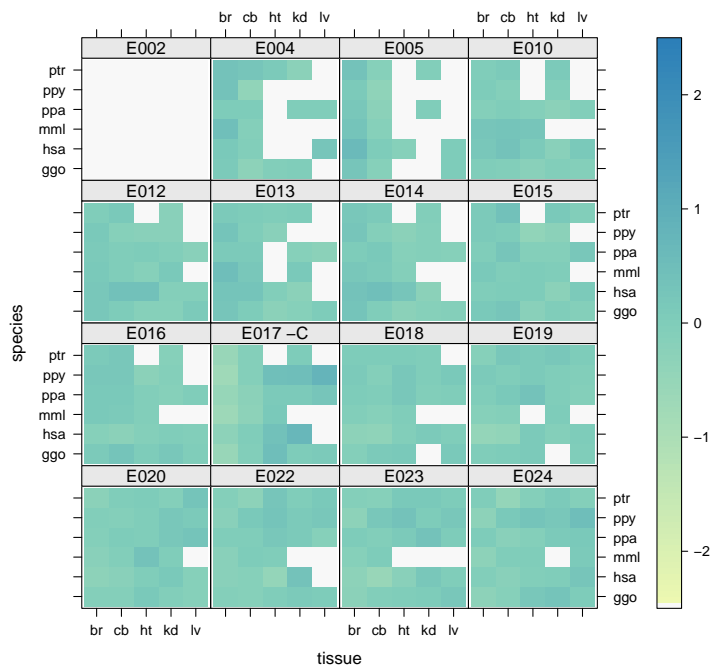

ENSG0000088387

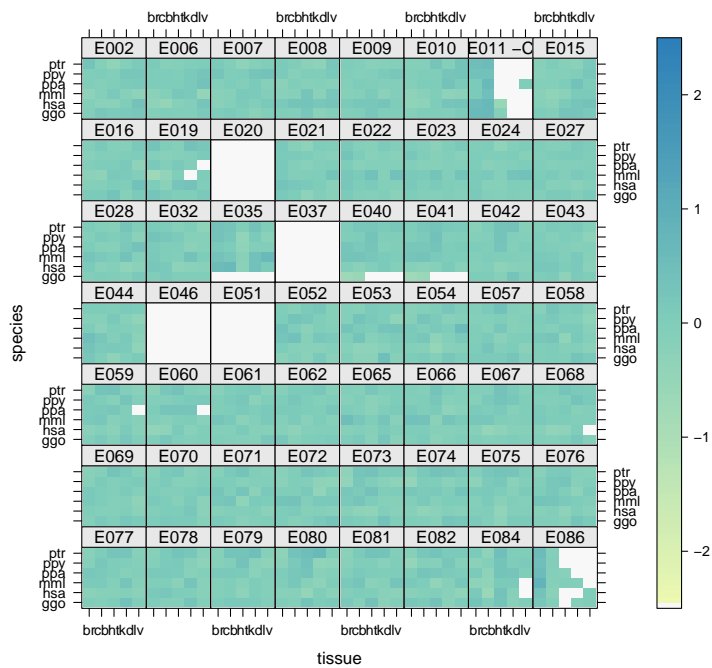

ENSG0000088766

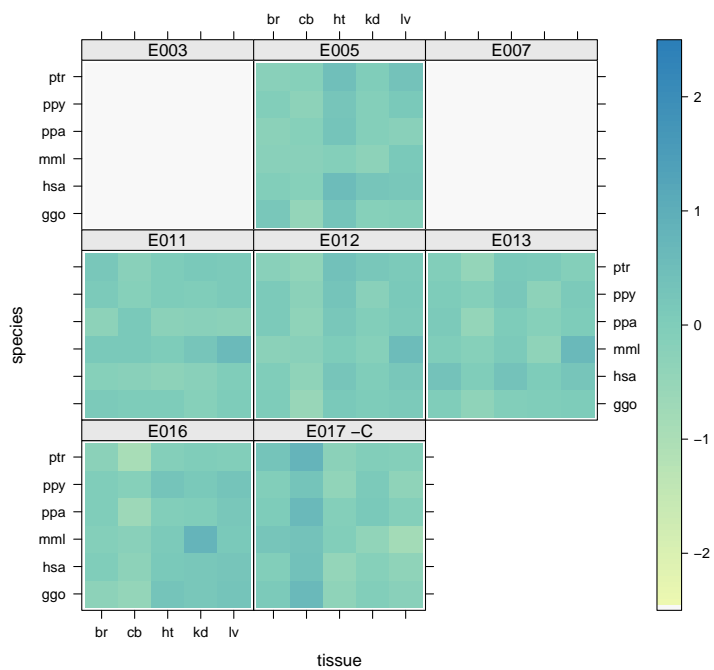





ENSG0000089159

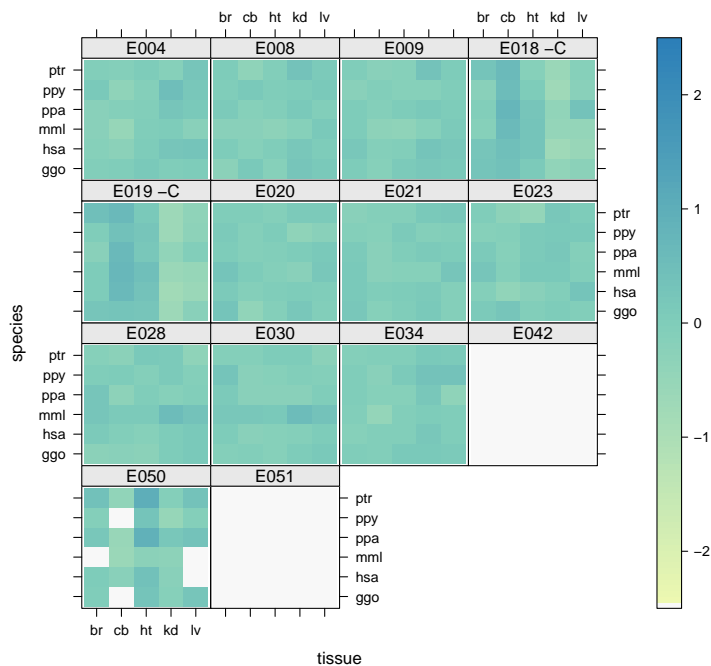

ENSG00000090565

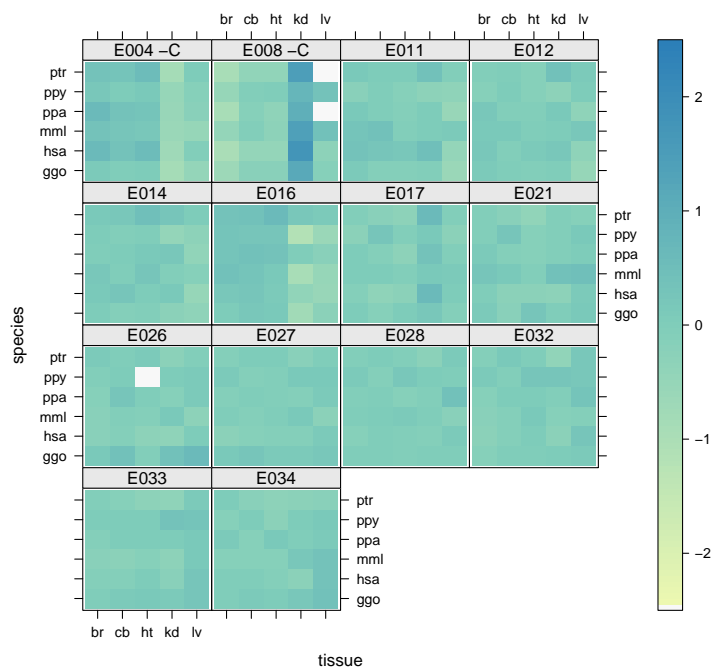



ENSG00000090975

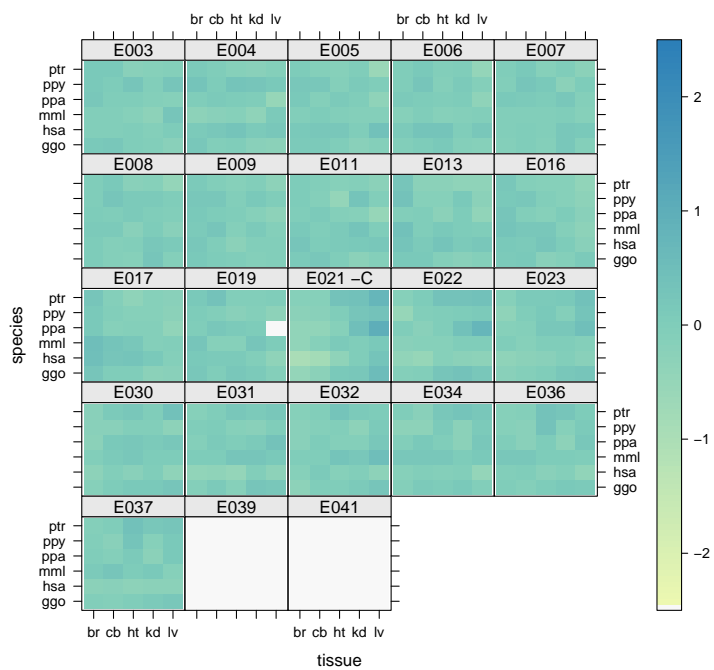

ENSG0000091136

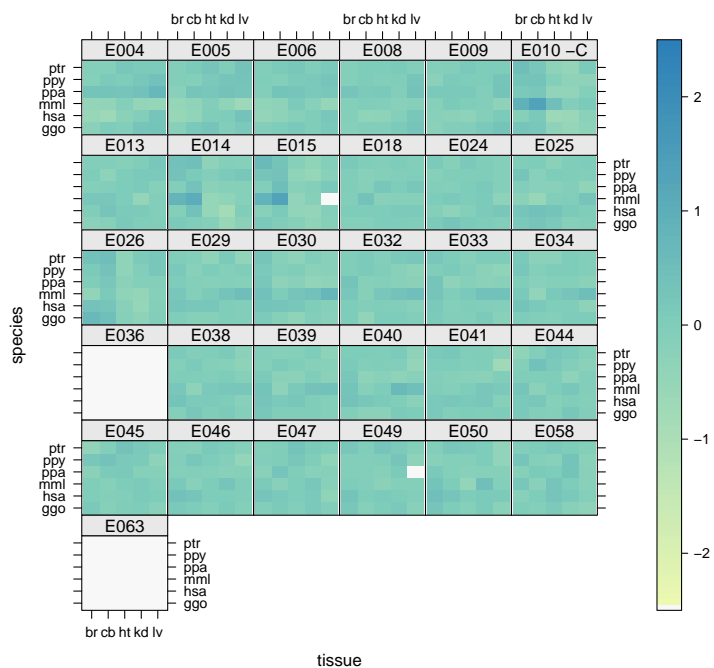

ENSG0000091157

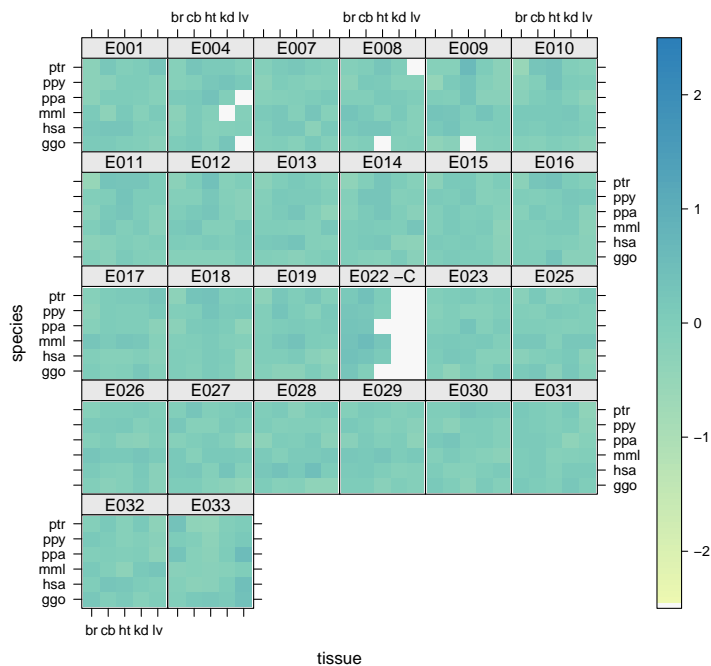

ENSG0000091428

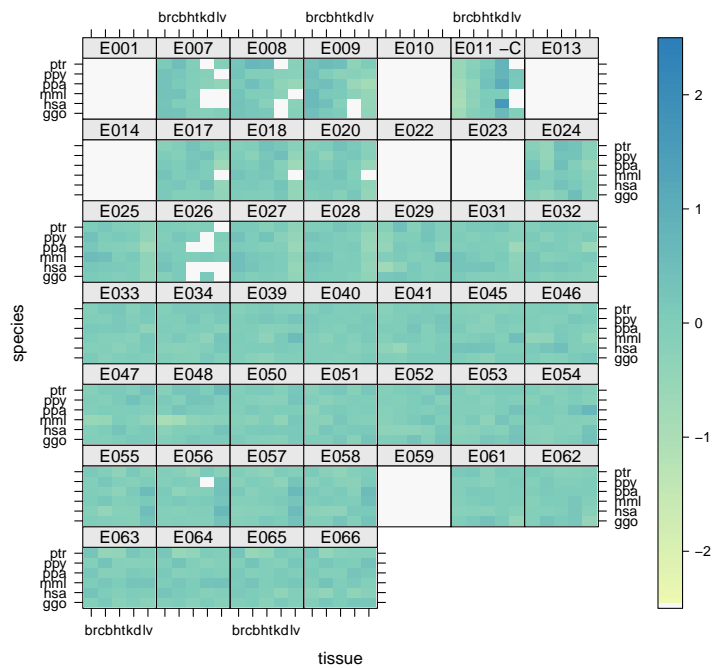











ENSG00000095585

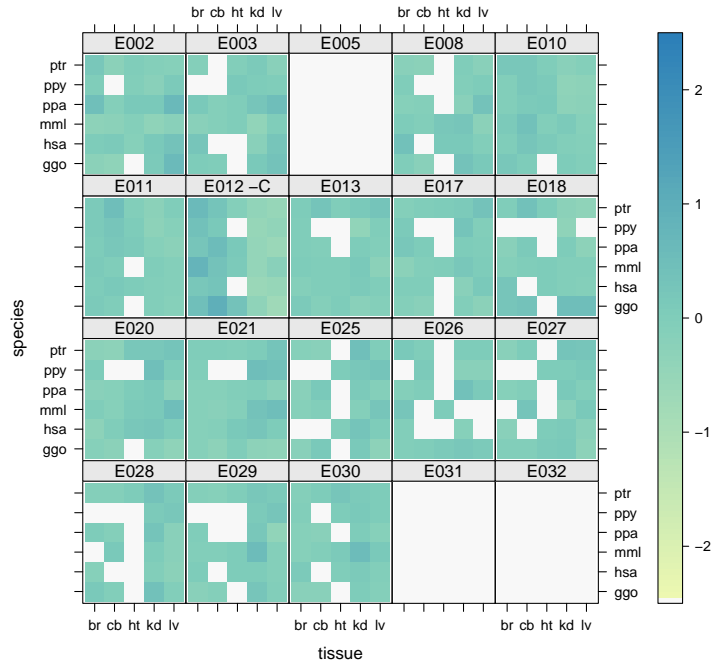

ENSG0000099139

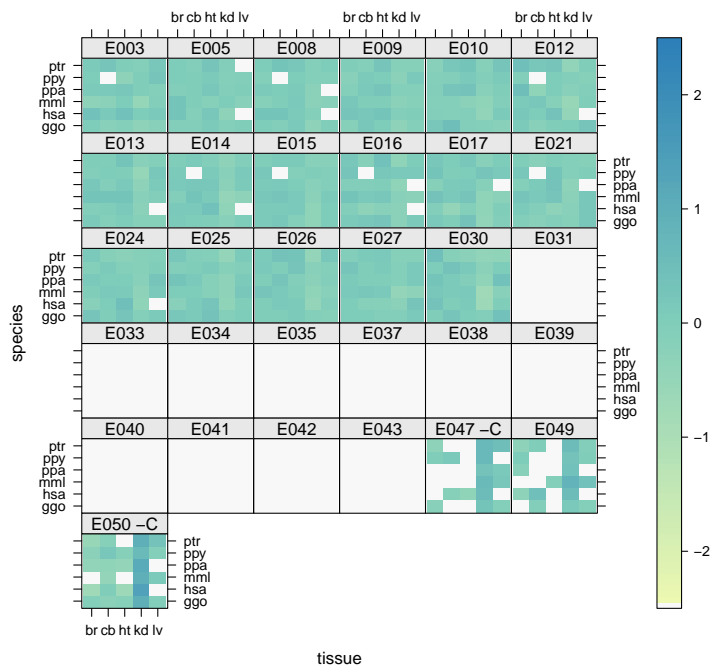

**ENSG0000099204**

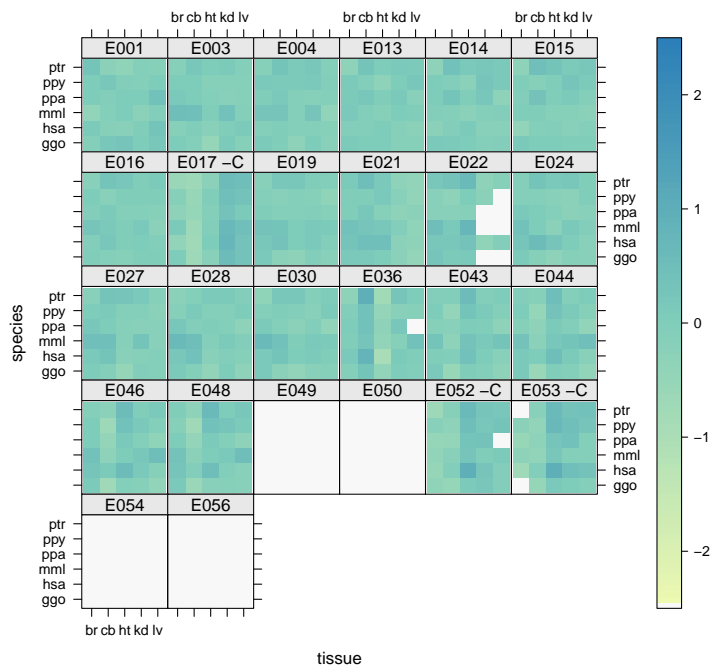





ENSG00000100105

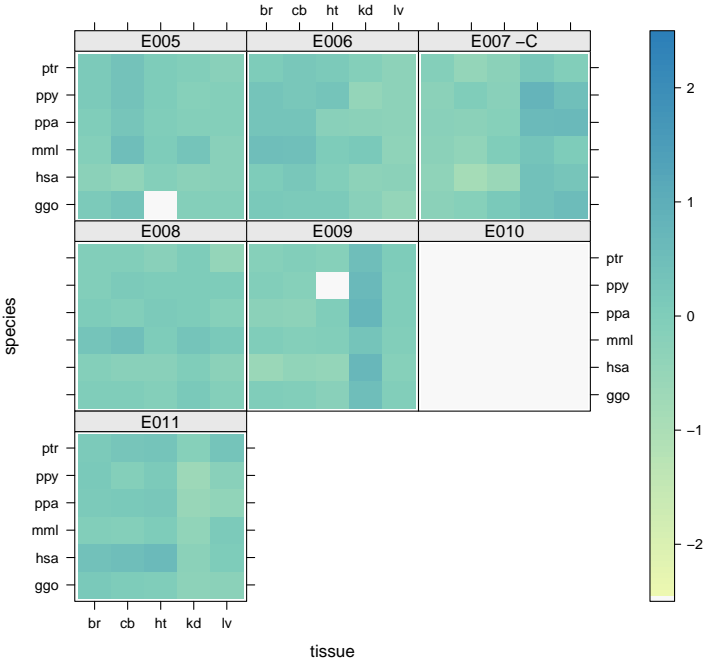

ENSG00000100142

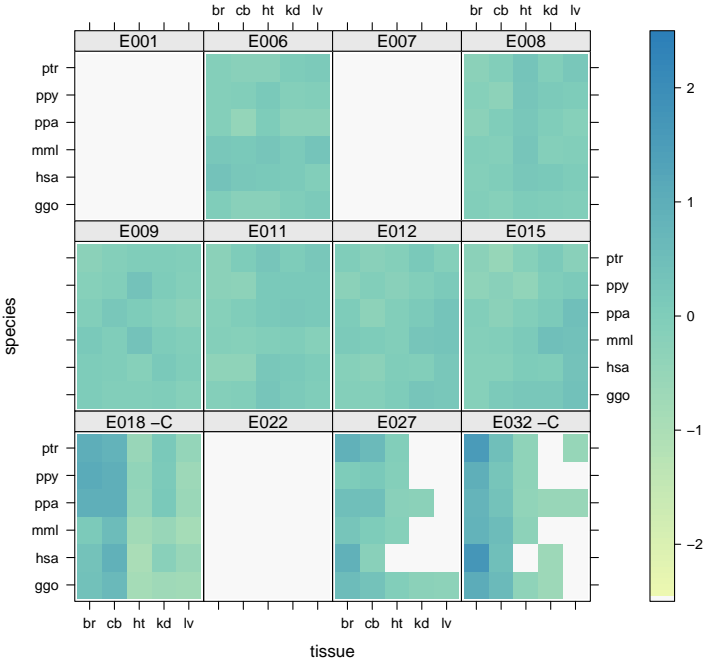

ENSG0000100241

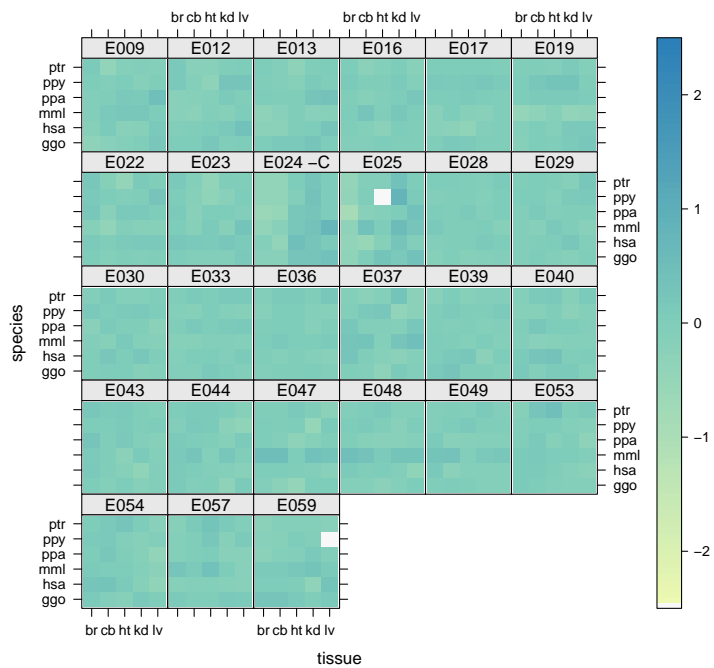

ENSG0000100364

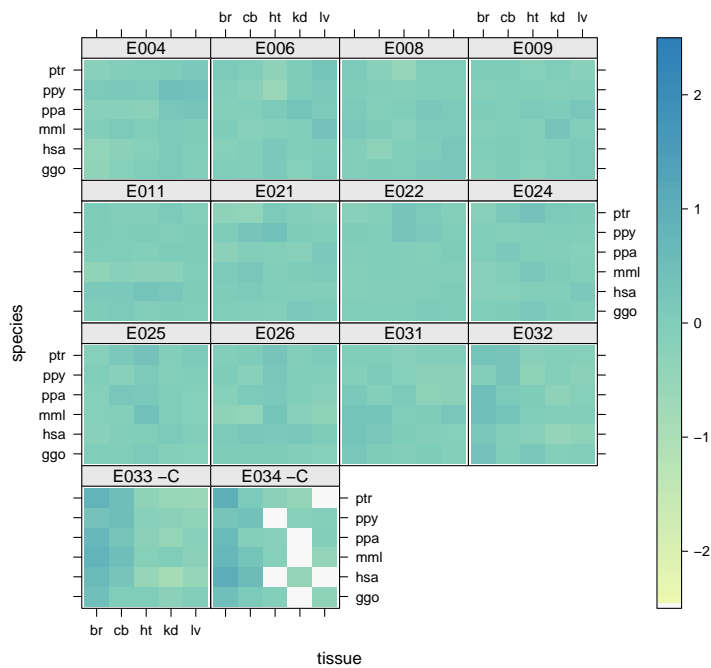



ENSG00000100652

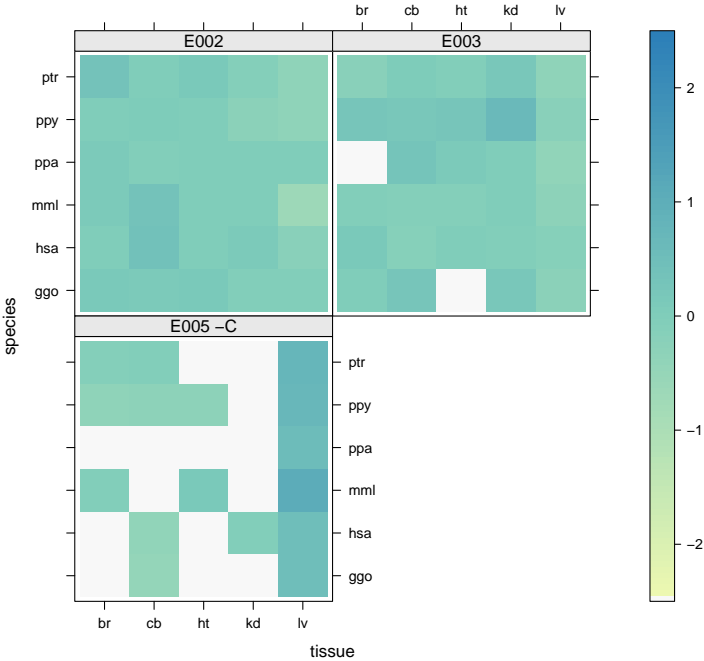













ENSG00000101443

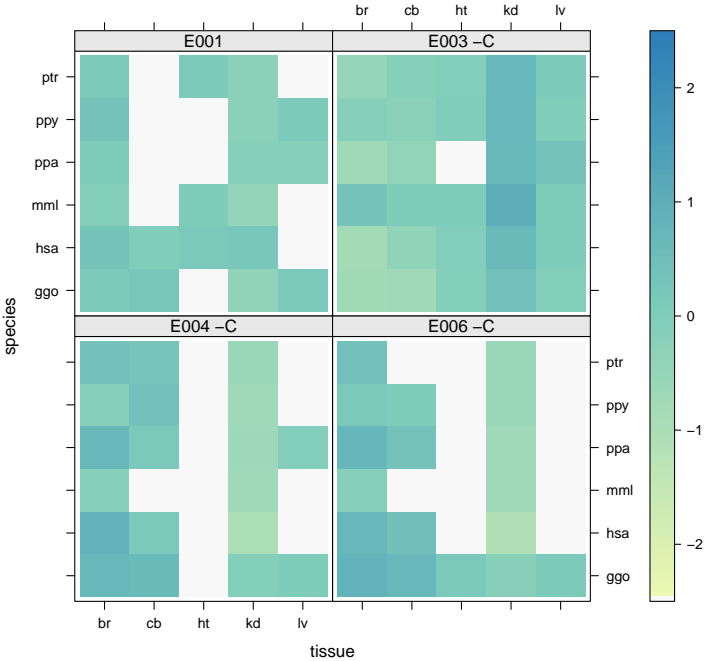

ENSG0000102606

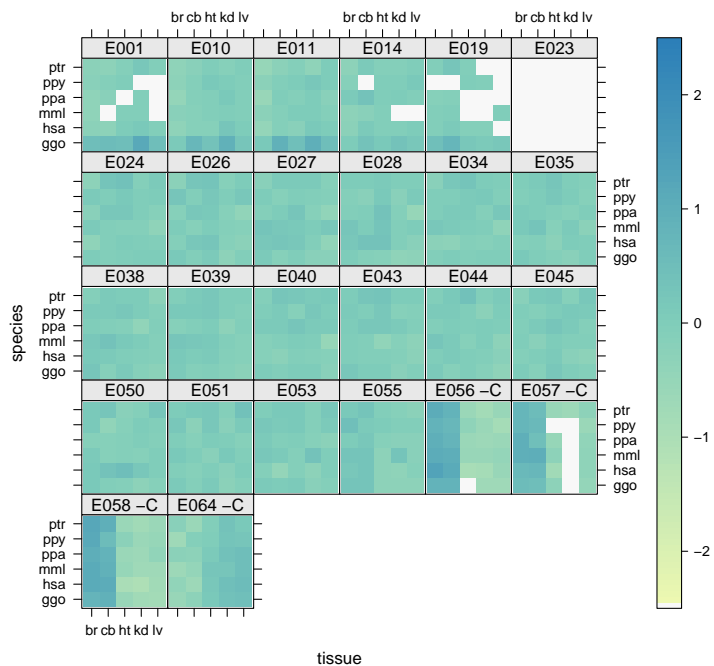

ENSG00000102804

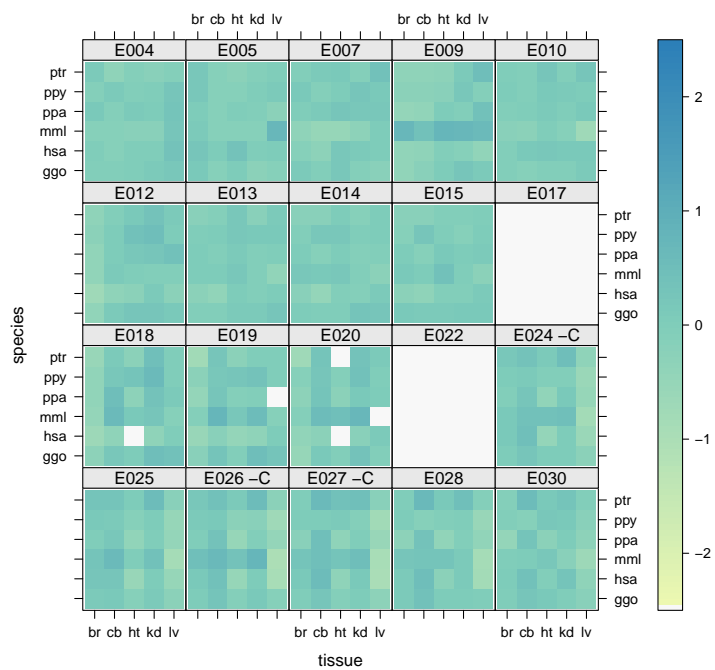

ENSG00000102967

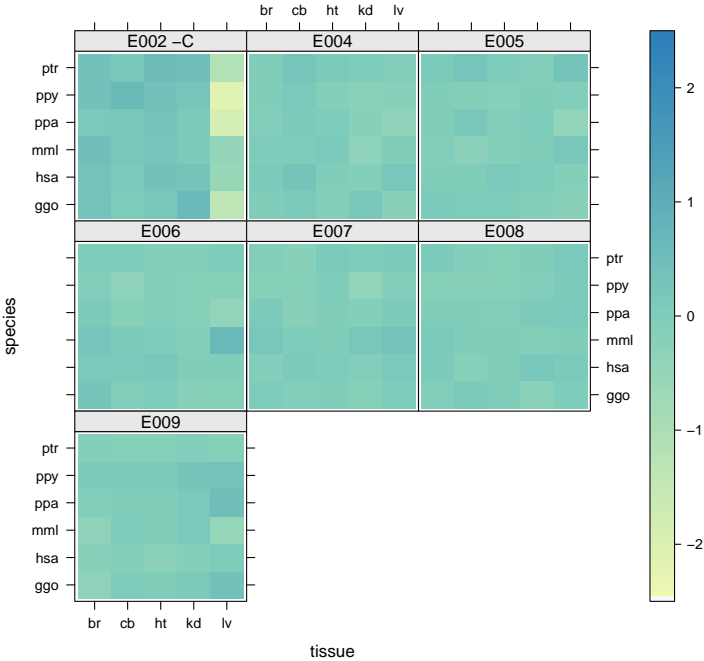





ENSG00000103034

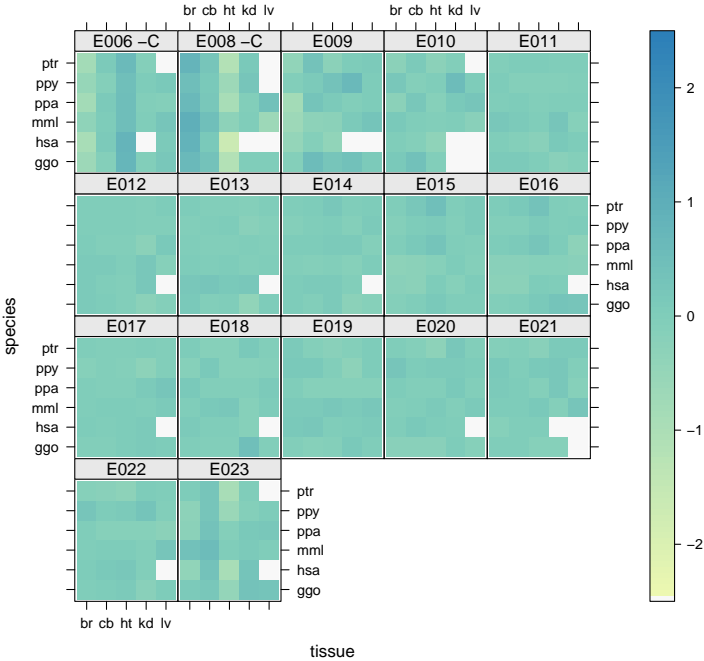

ENSG00000103168

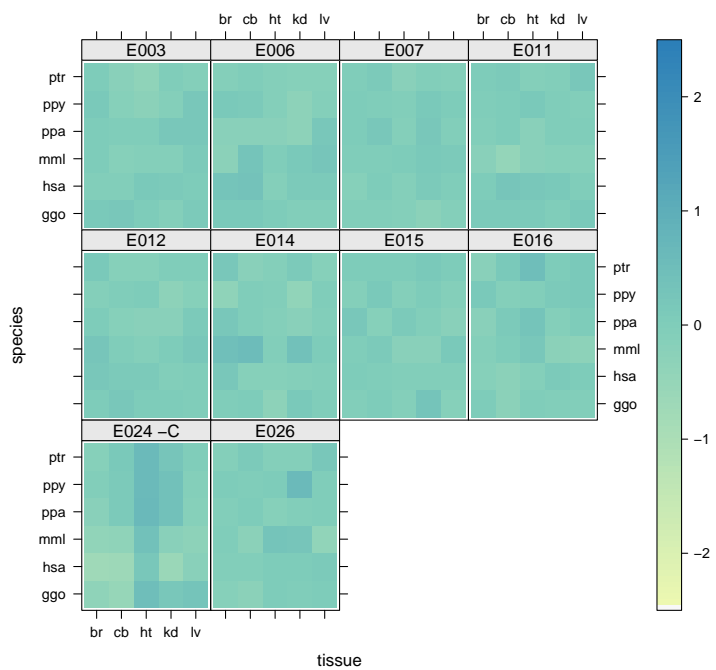

ENSG00000104067

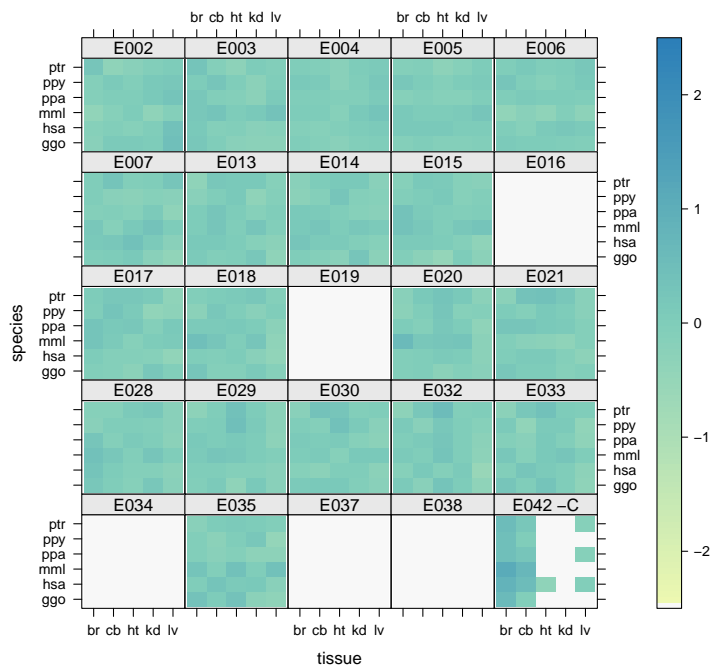



ENSG00000104635

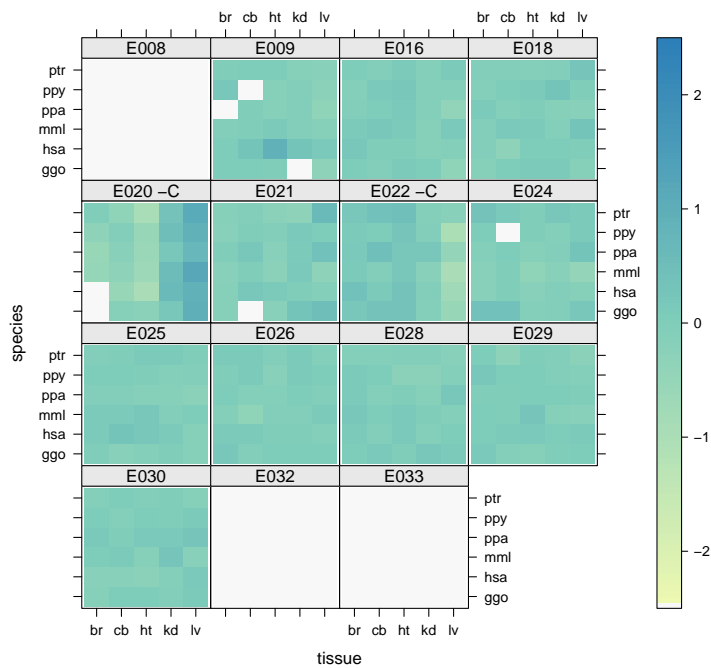





ENSG00000104936

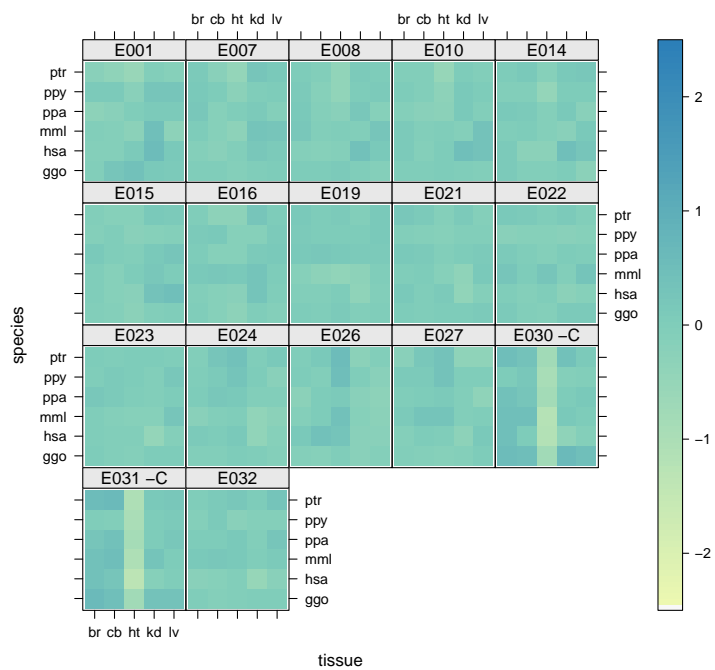







ENSG00000105472

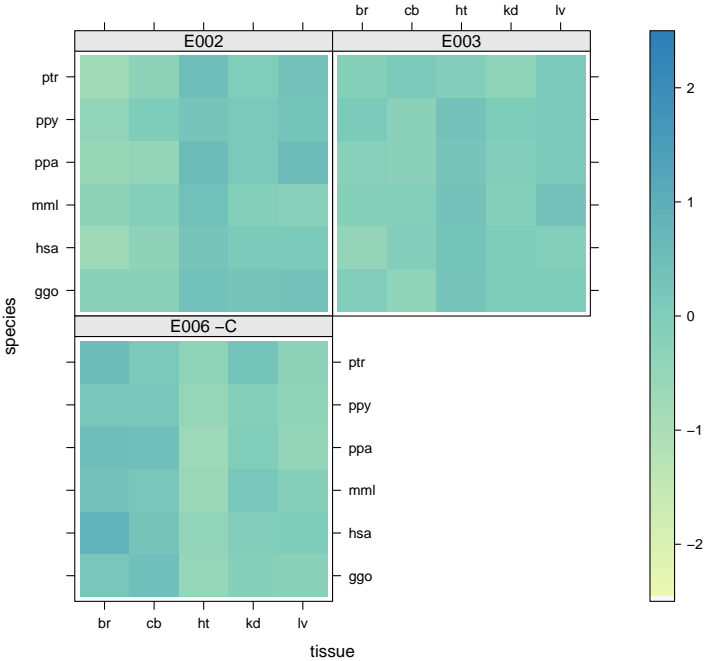

ENSG00000105552

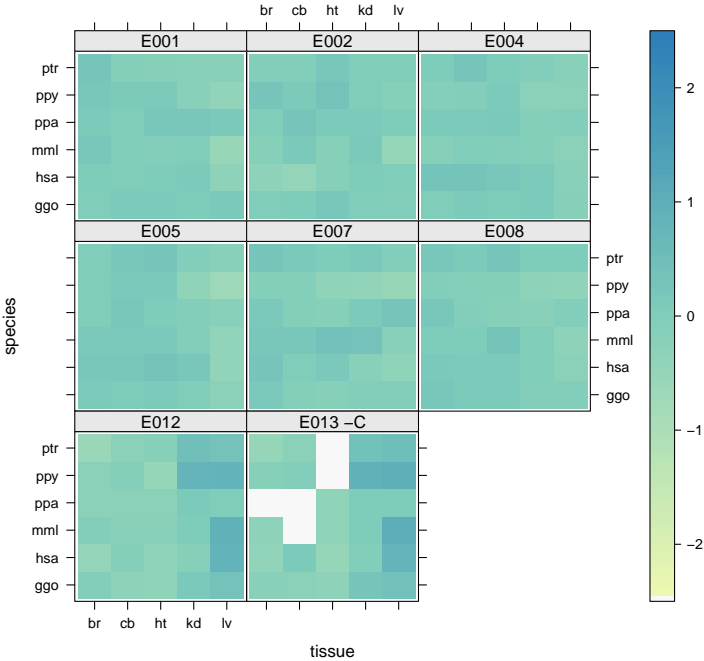

ENSG00000105929

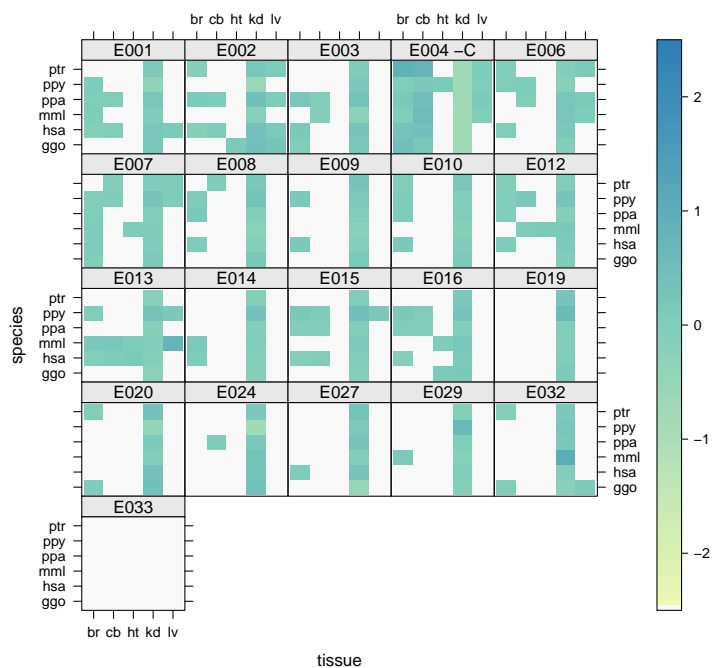





ENSG0000106066

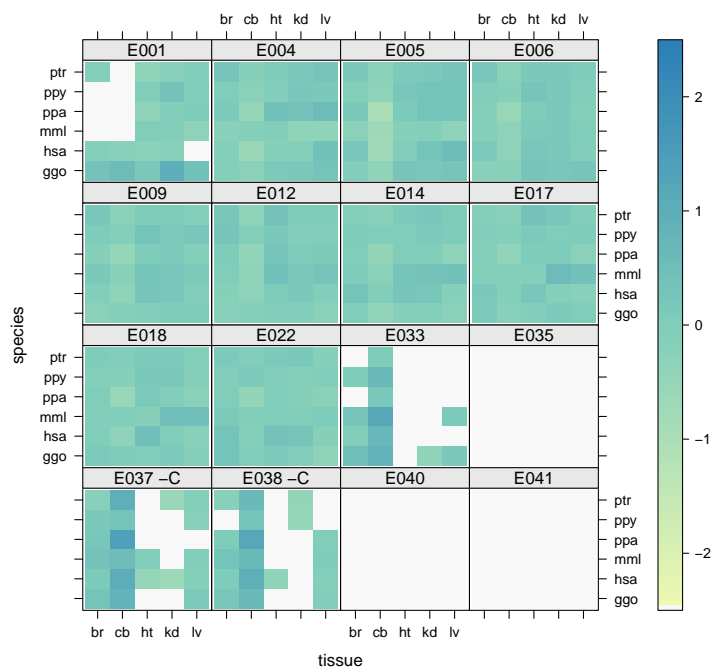







ENSG00000106327

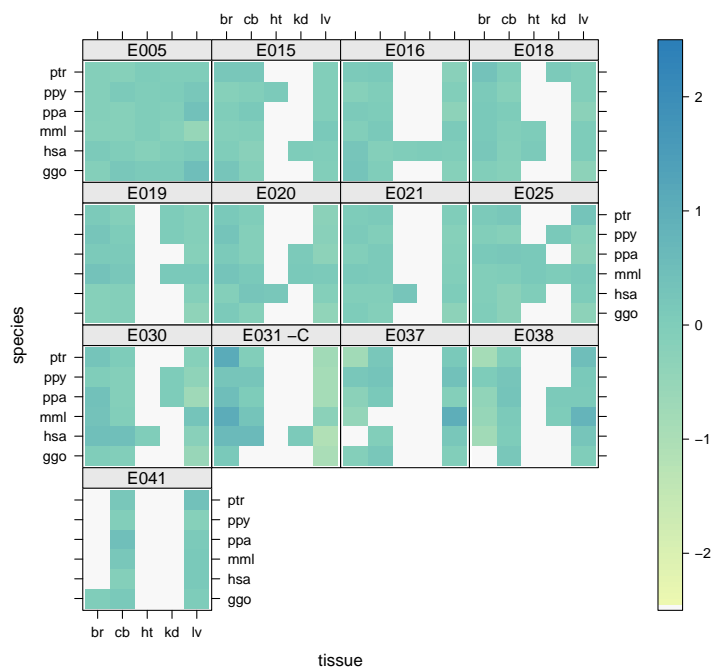





ENSG00000106772

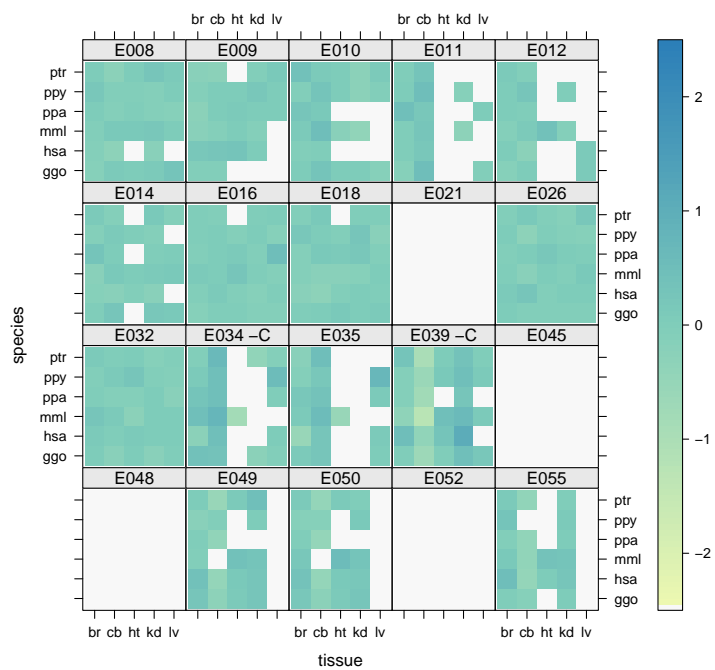

ENSG00000106927

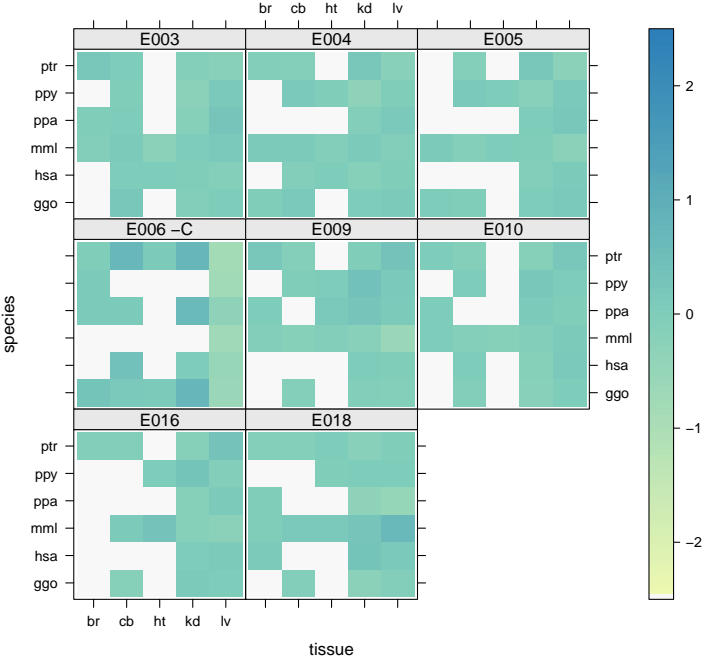





ENSG0000107186

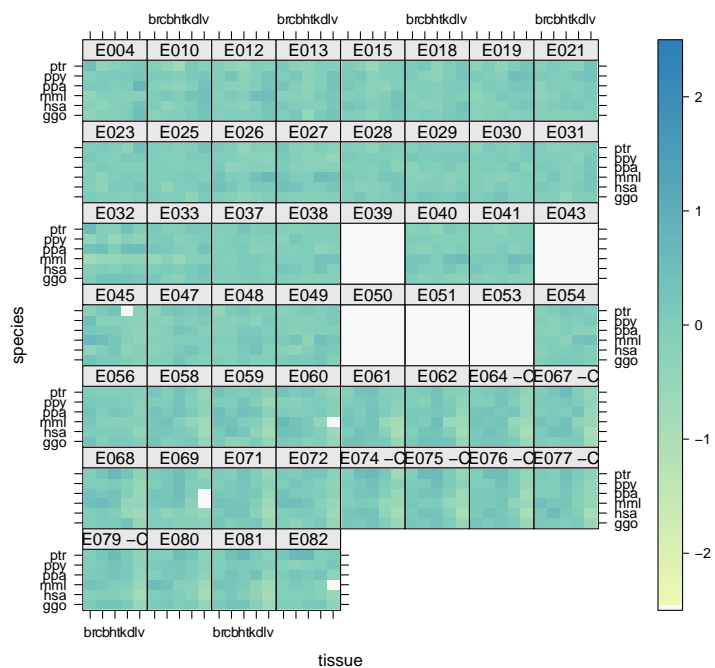

ENSG00000107263

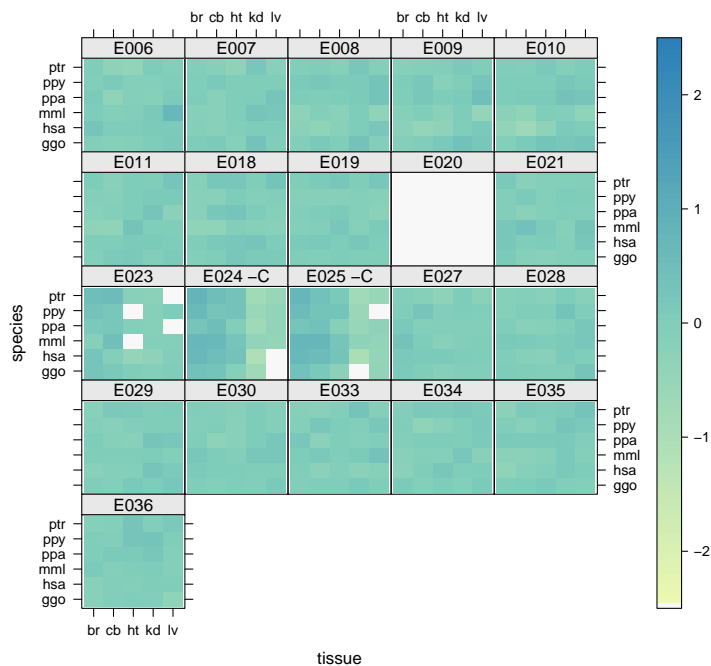



ENSG00000107562

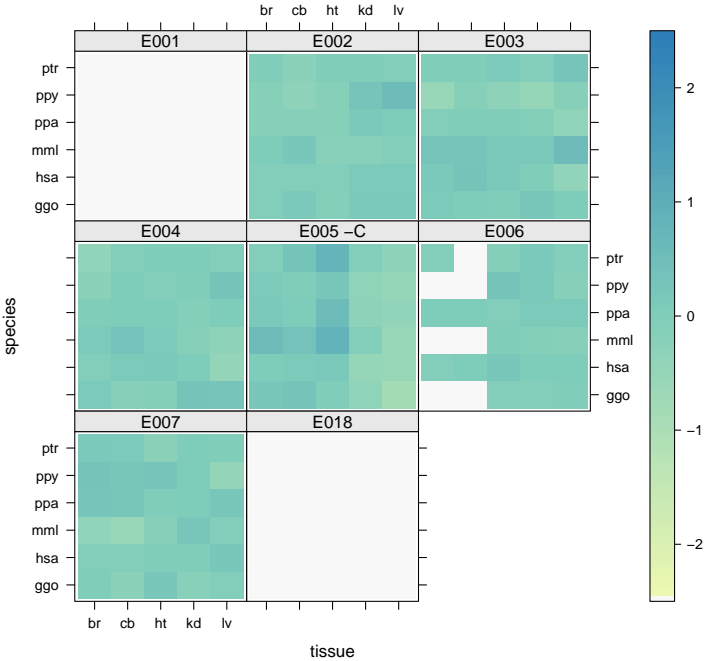

ENSG00000107643

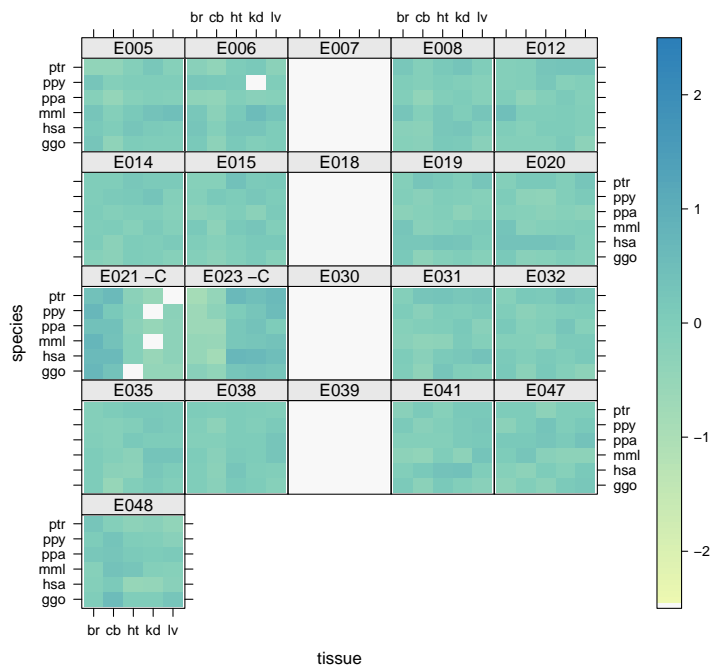

ENSG0000107736

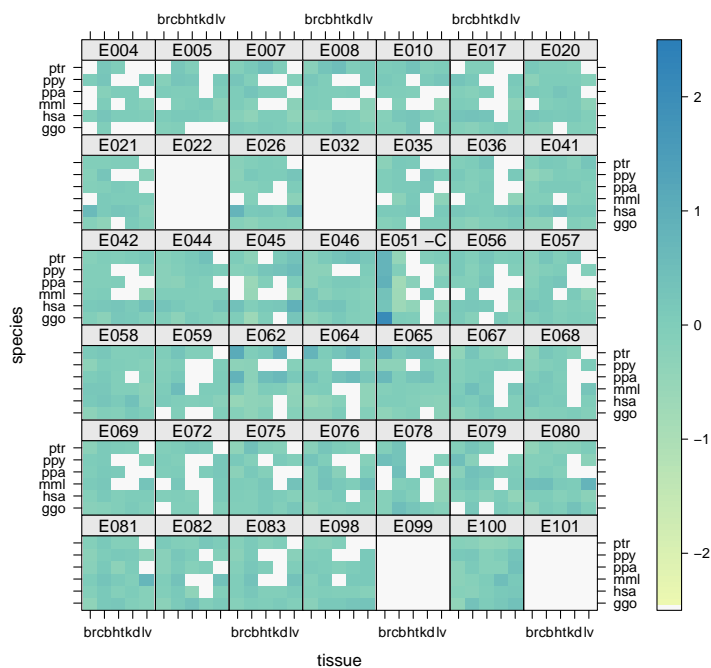



ENSG00000107771

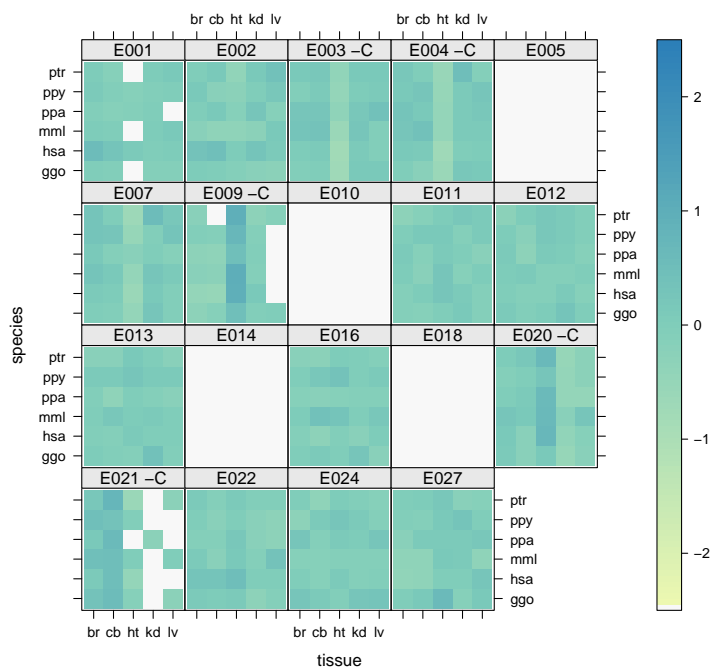



ENSG00000107872

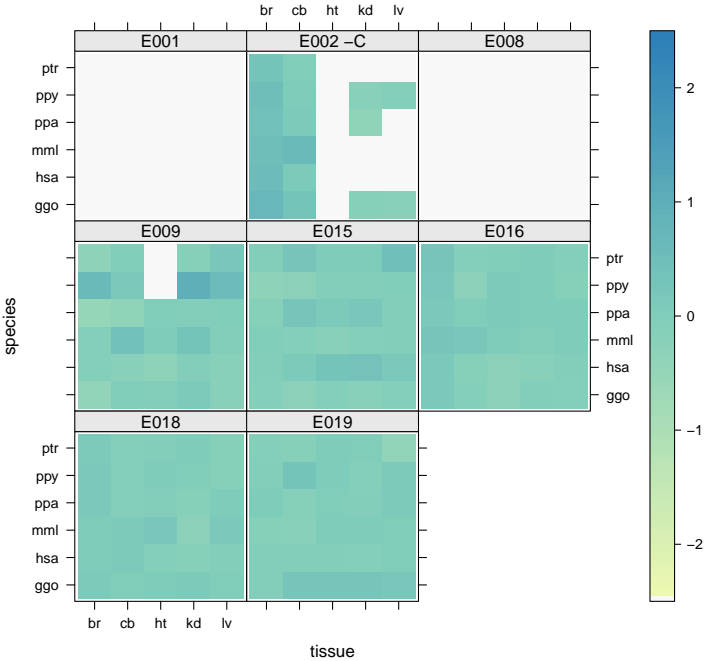

ENSG0000108175

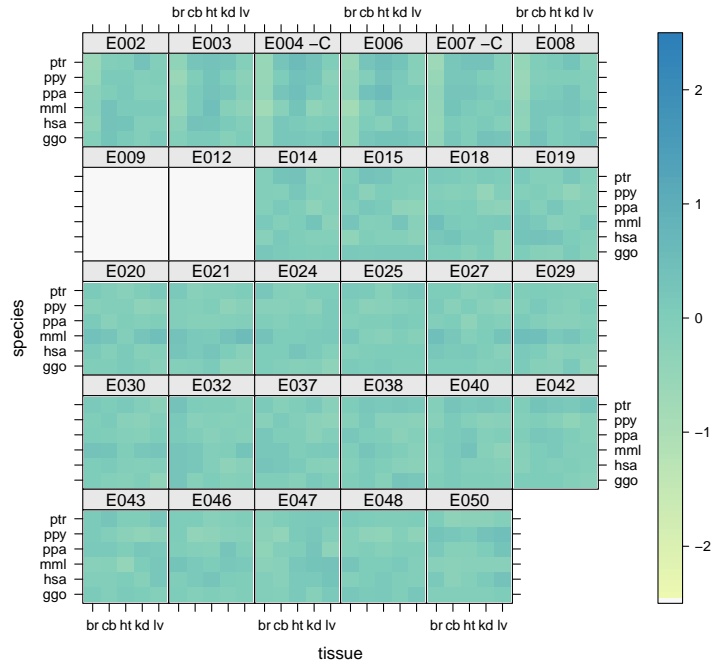



ENSG00000108262

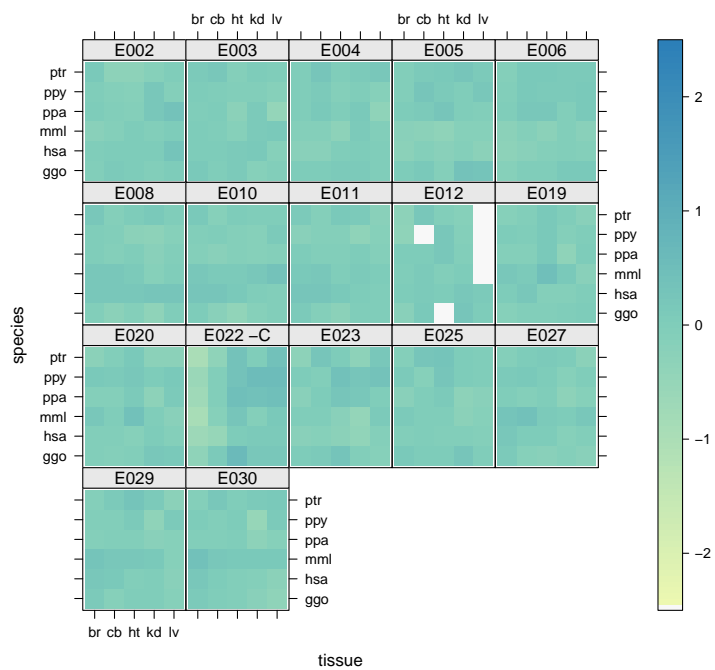

ENSG0000108387

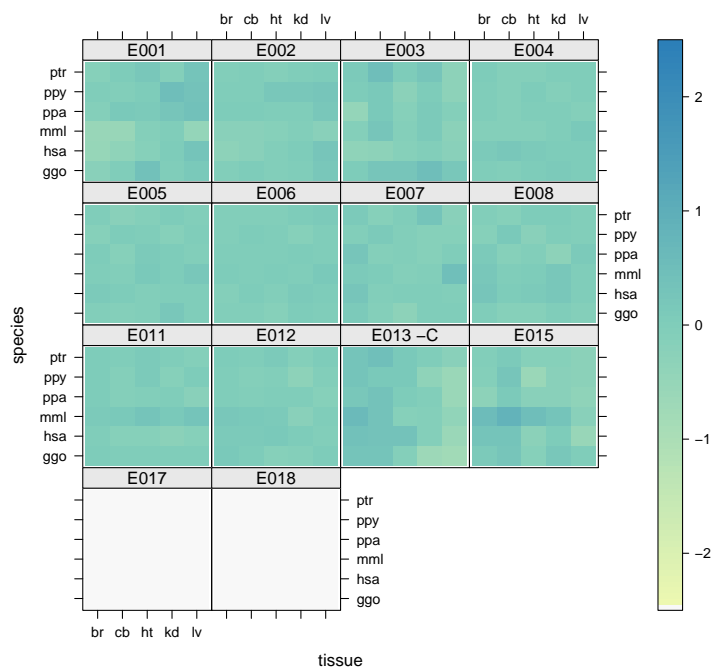

ENSG0000108515

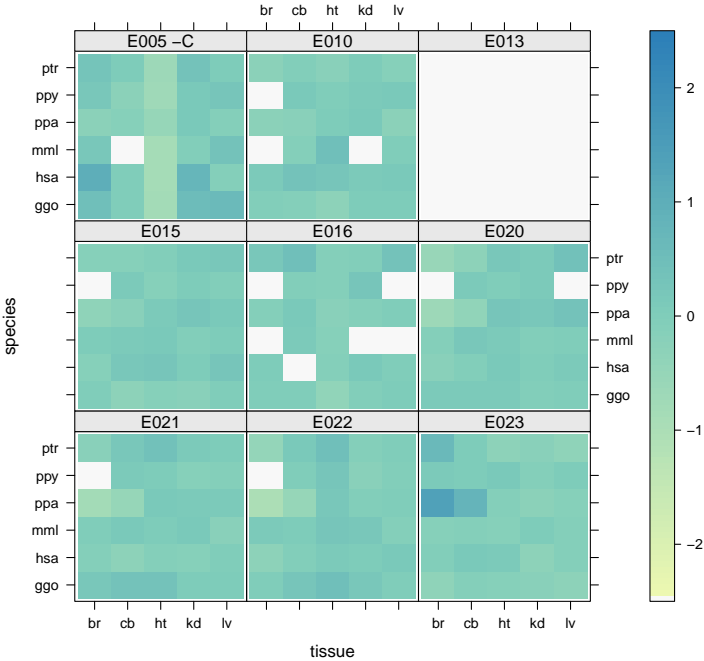

ENSG00000108840

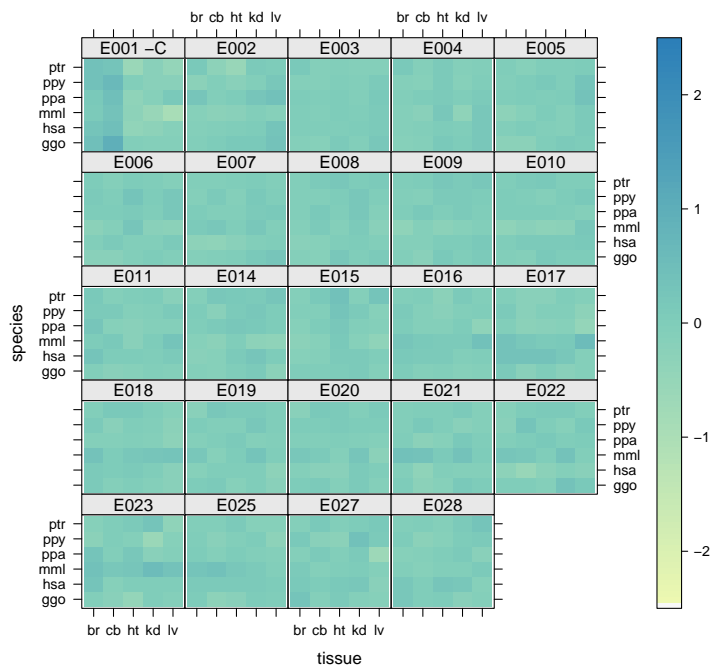

ENSG00000108953

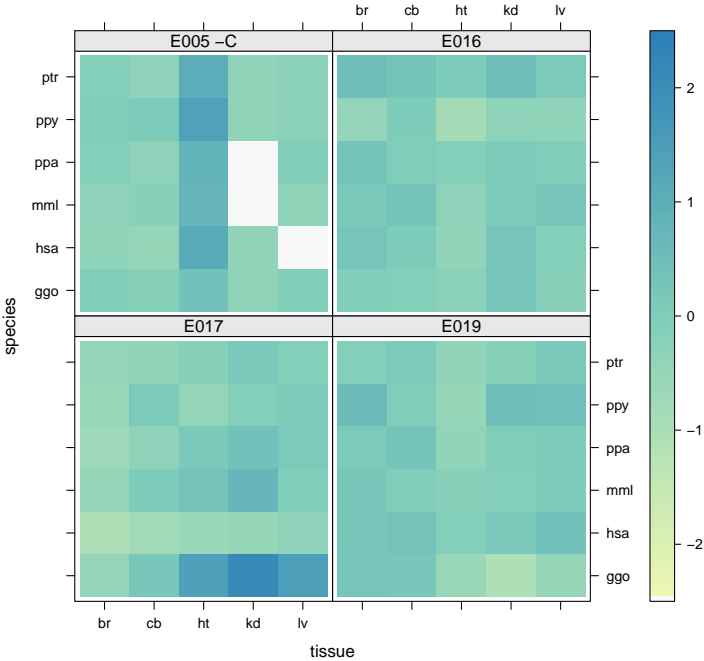



ENSG00000109180

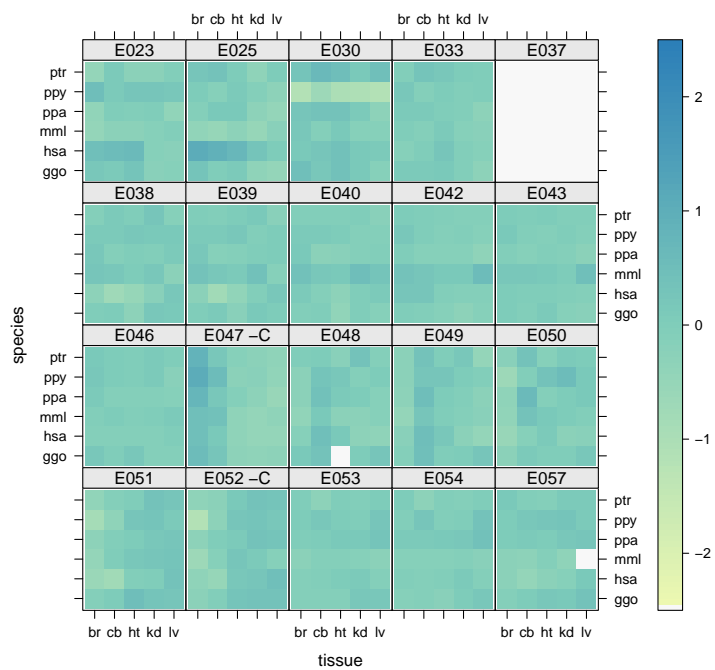









ENSG0000109819

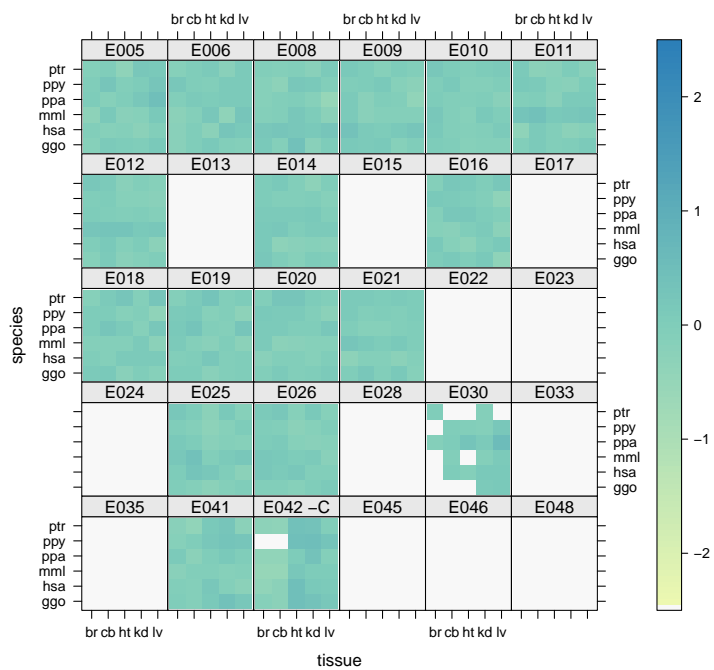







ENSG0000110075

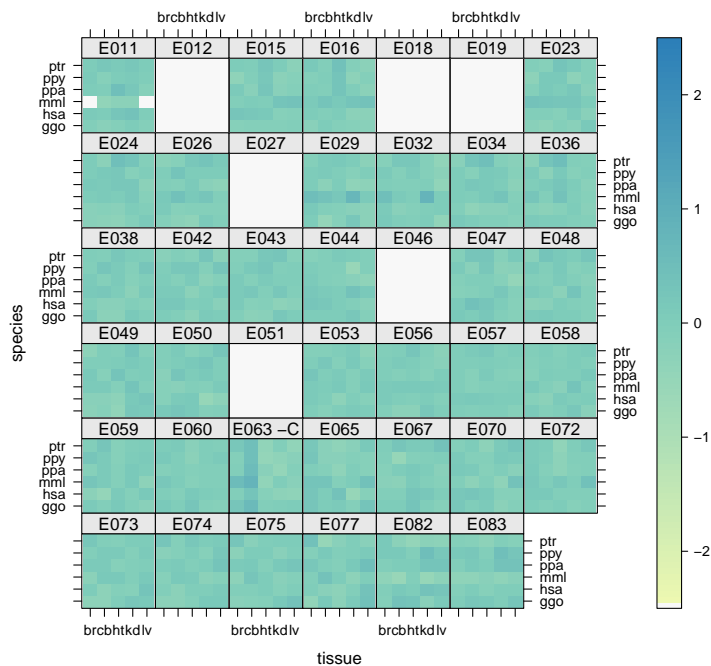



ENSG00000110169

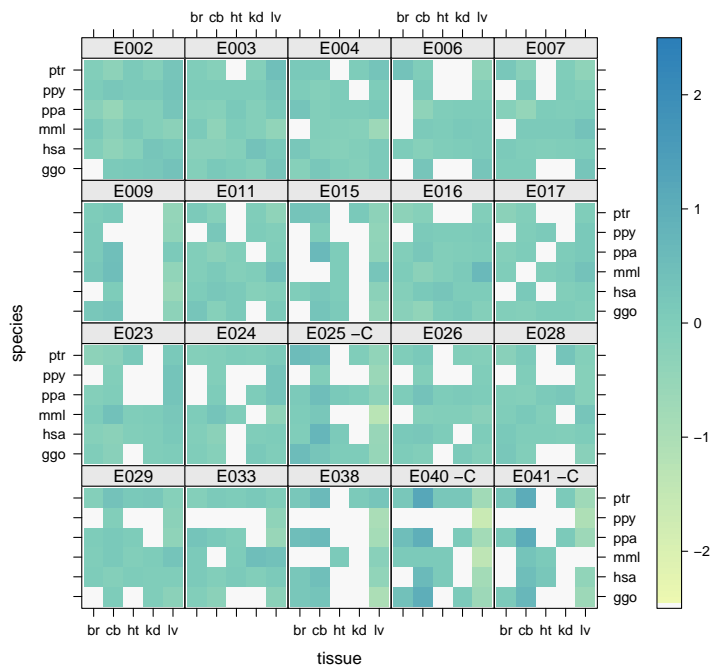



ENSG00000111412

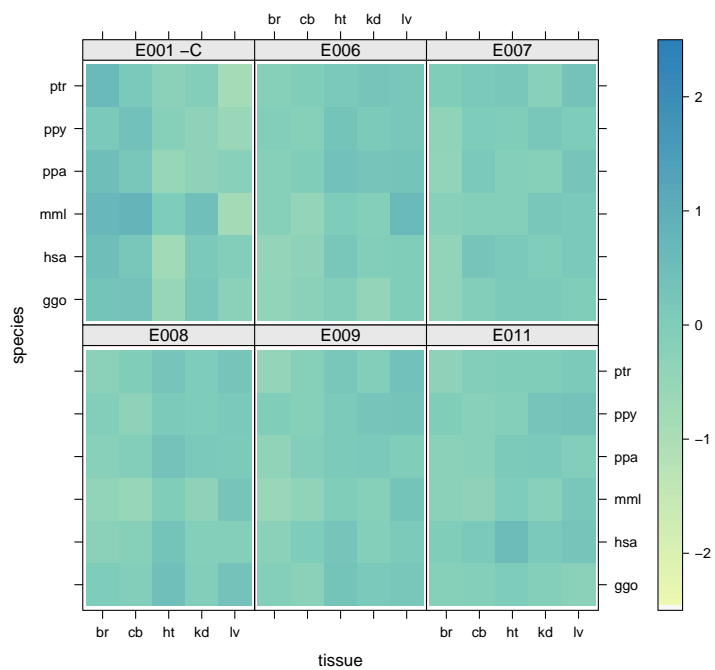



ENSG00000111684

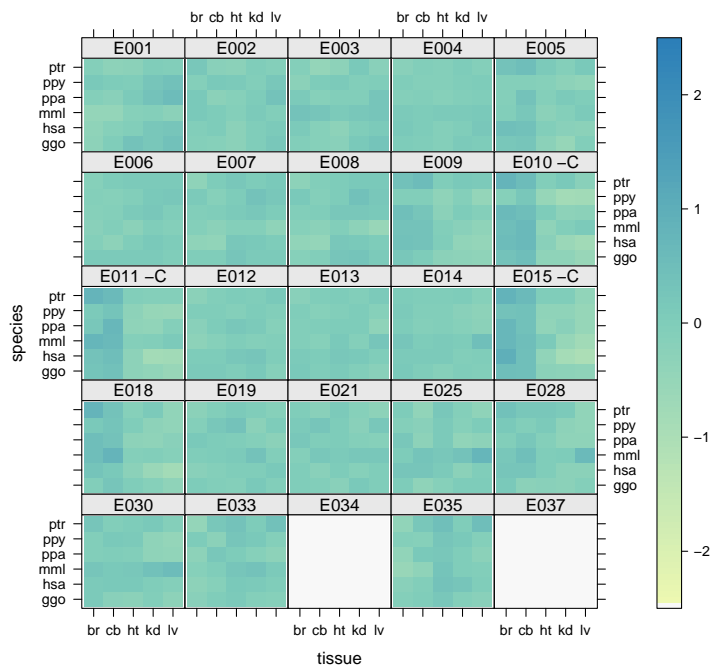

ENSG0000111731

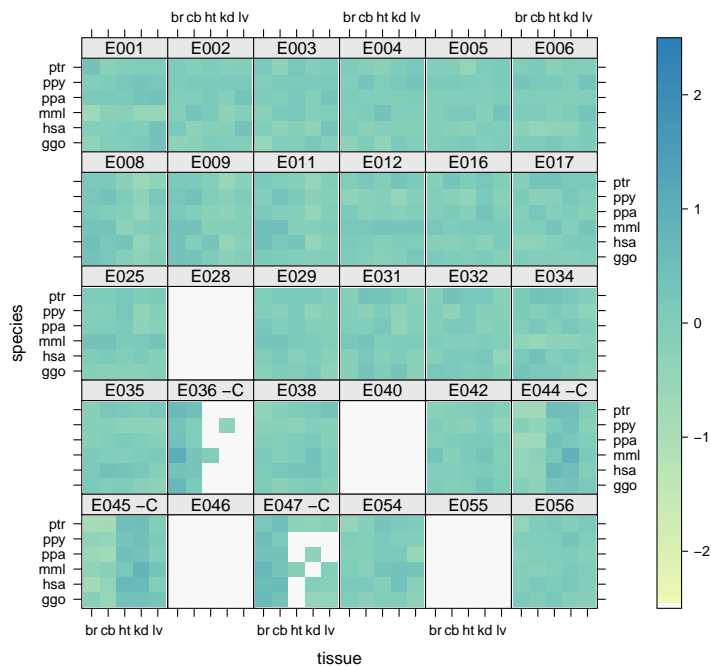



ENSG0000111785

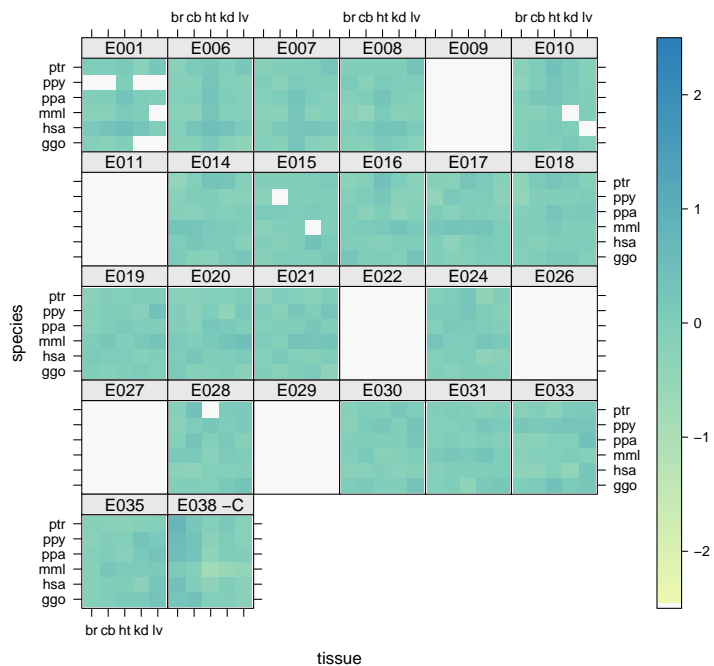

ENSG0000112137

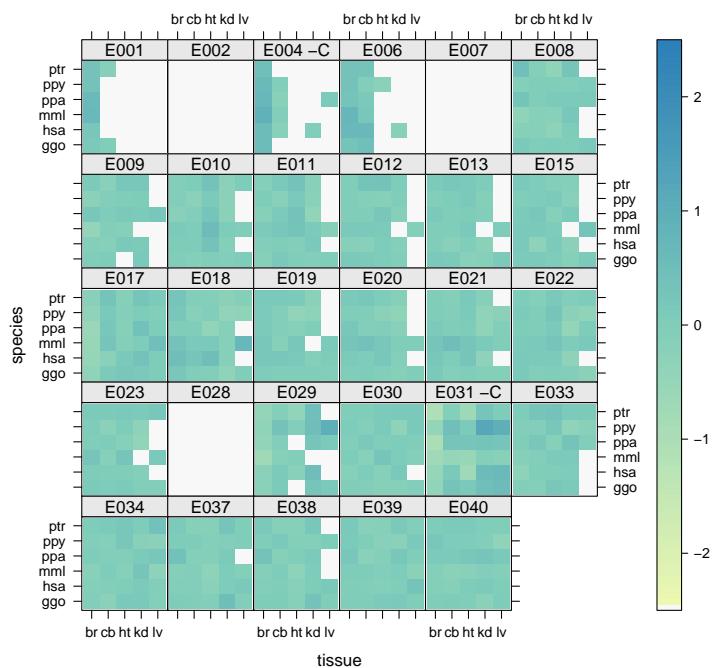



ENSG00000112293

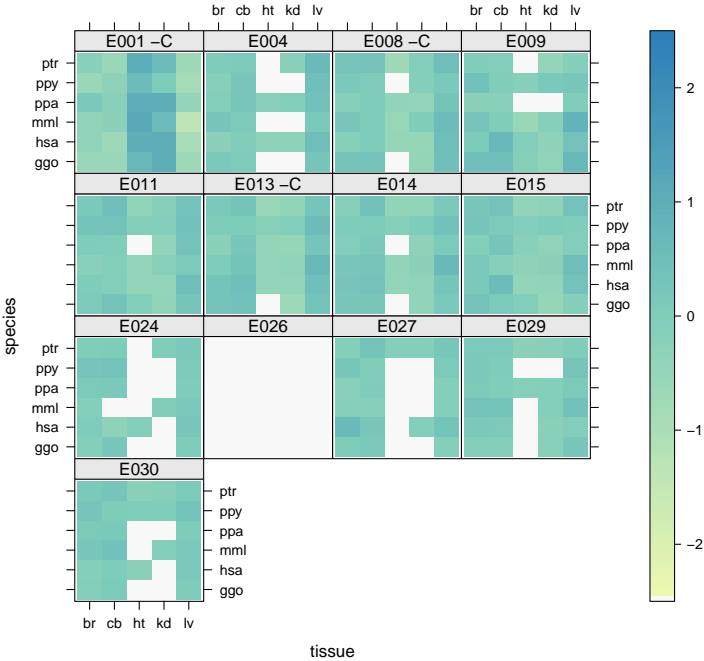

ENSG00000112530

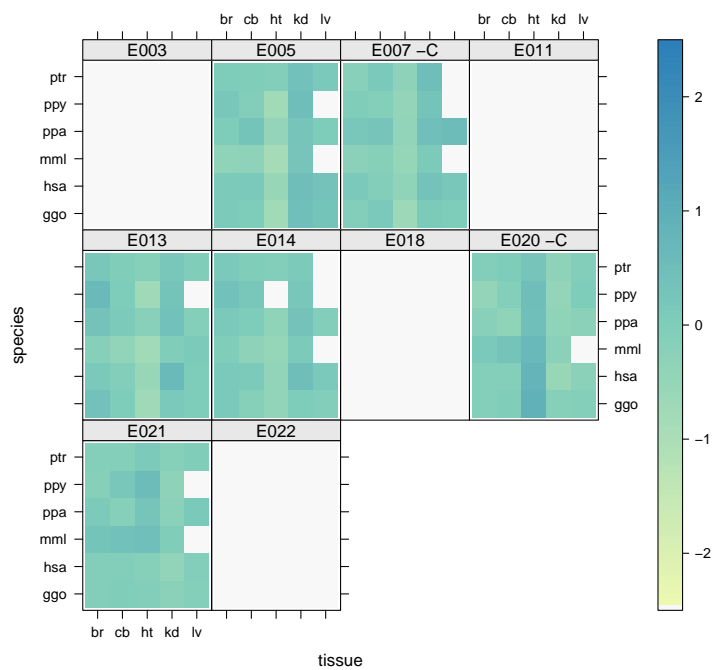





ENSG00000113141

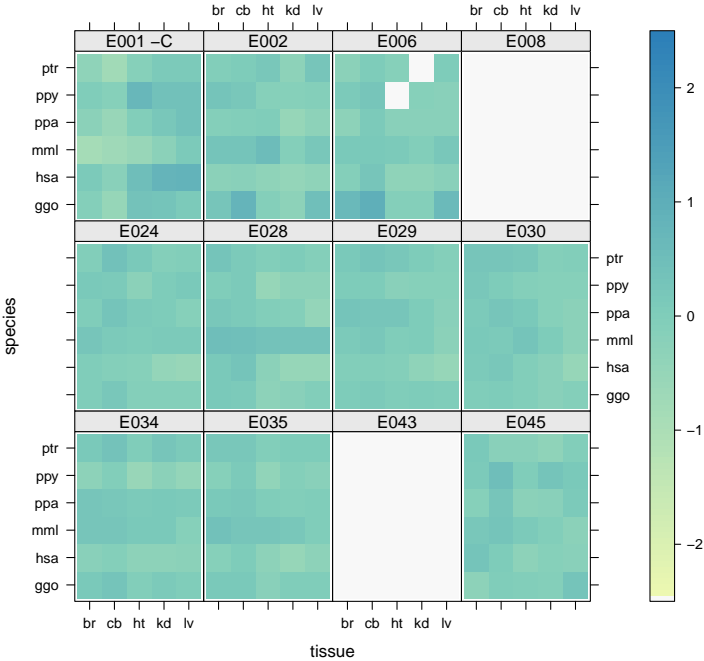



ENSG00000113163

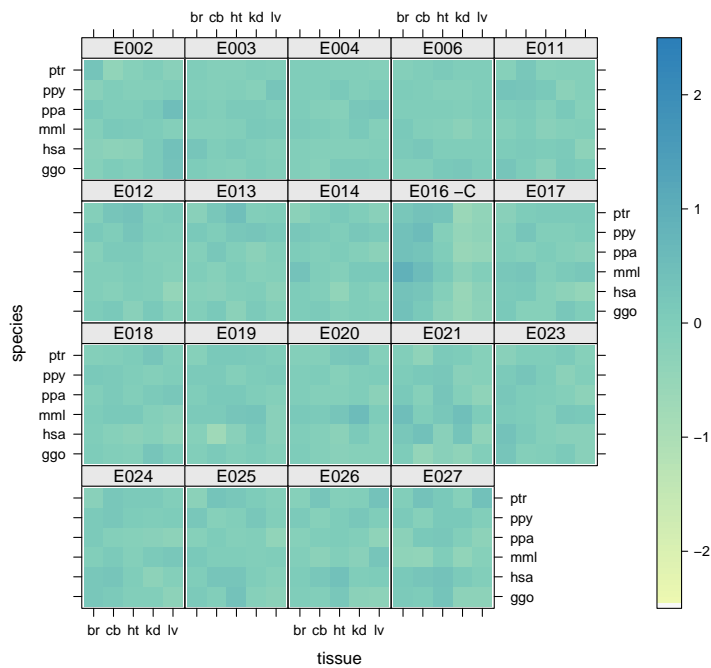



ENSG00000113648

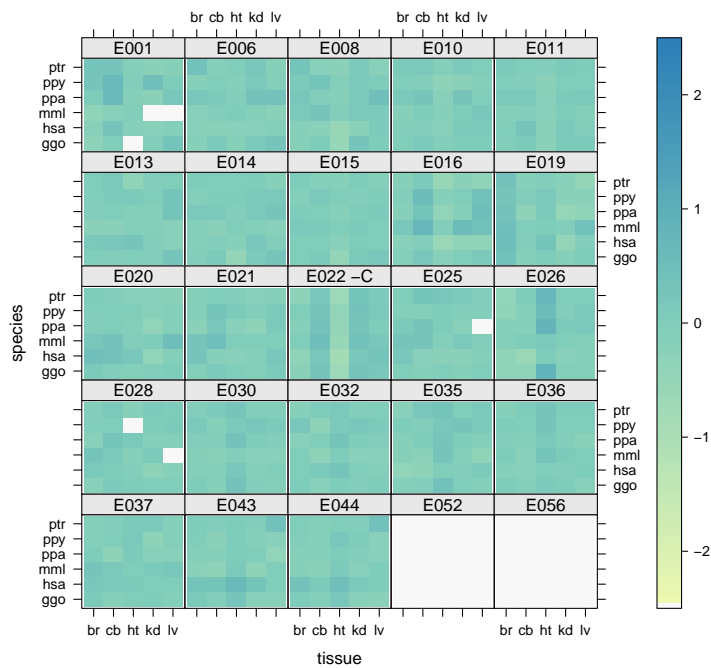

ENSG00000113742

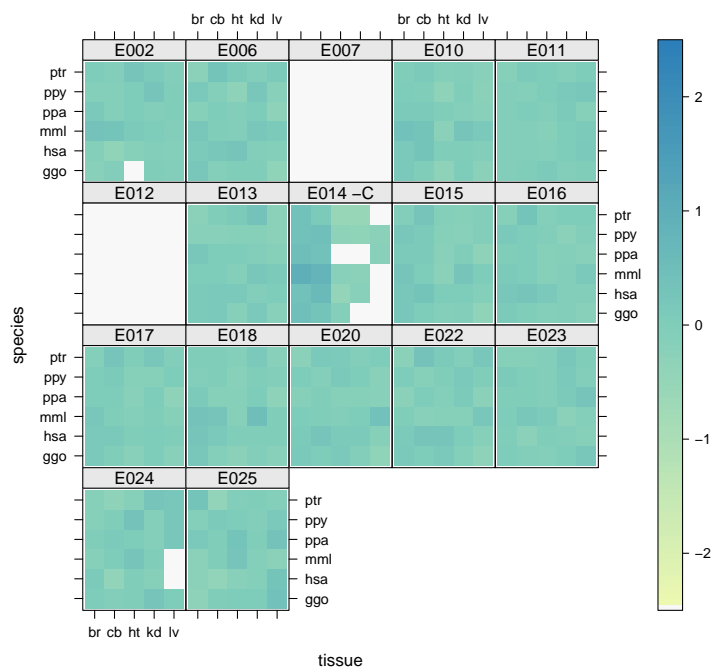

ENSG00000114279

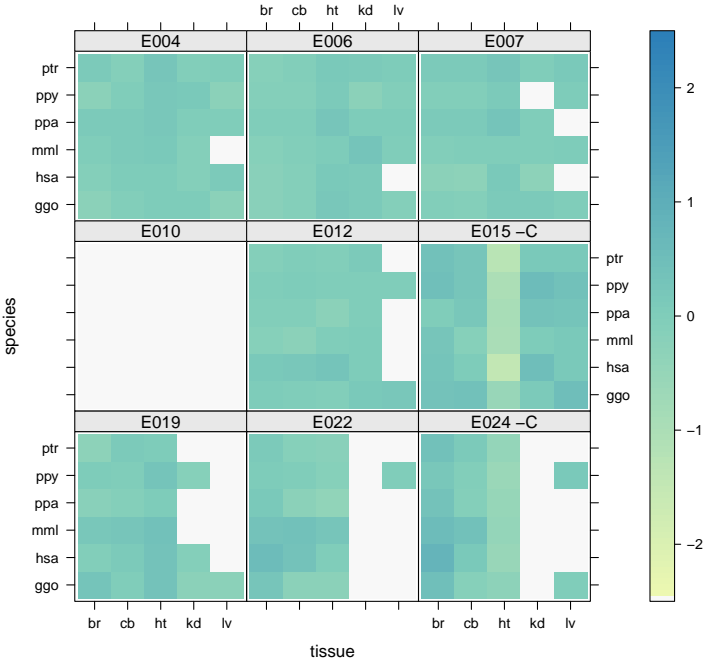

ENSG00000114416

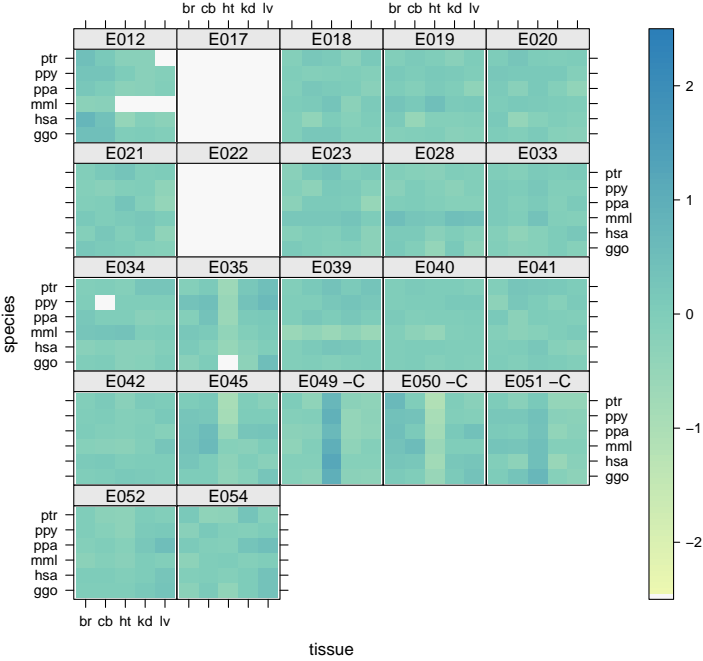



ENSG00000114854

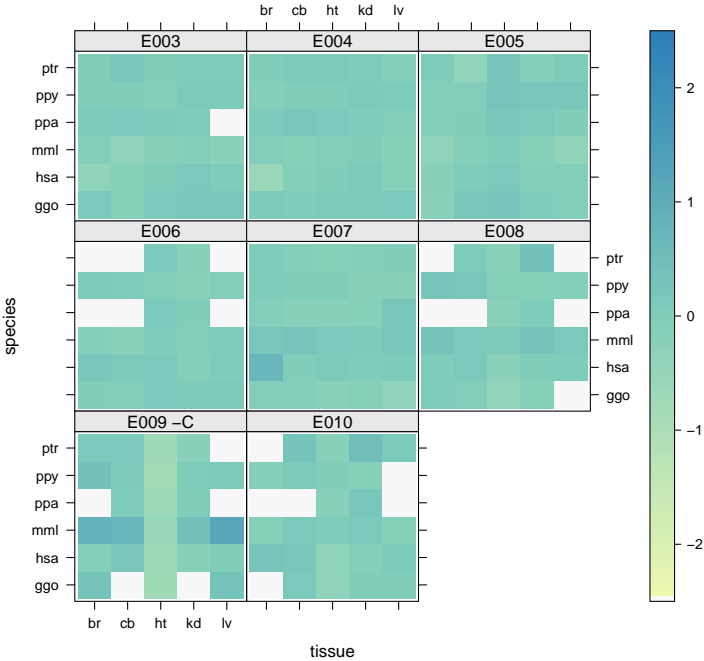





ENSG00000114993

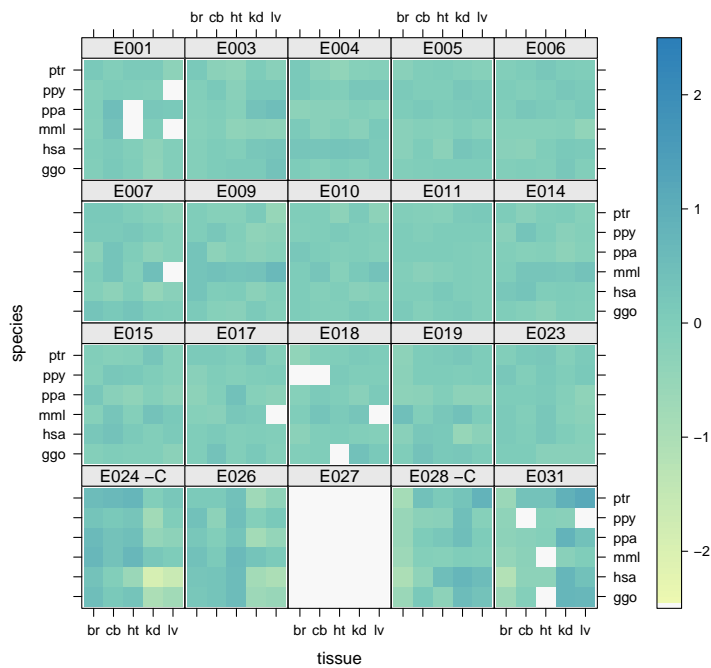

ENSG00000115109

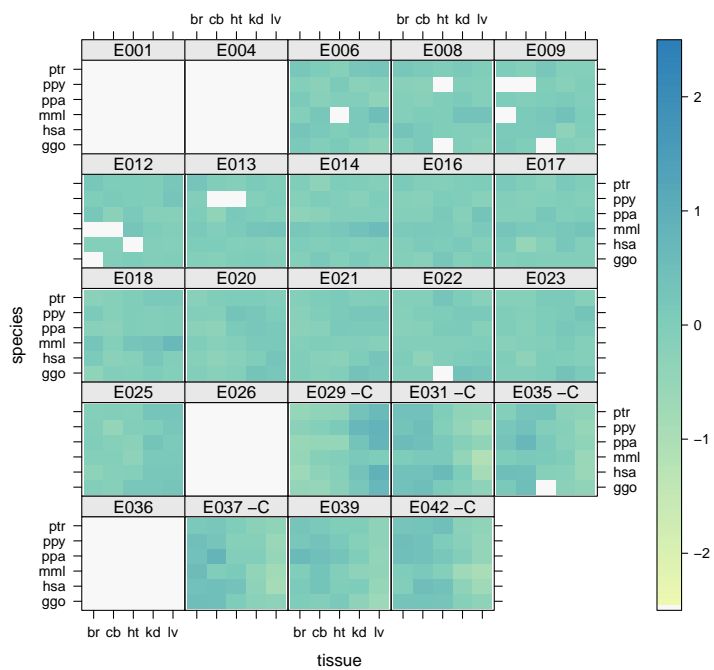

ENSG00000115226

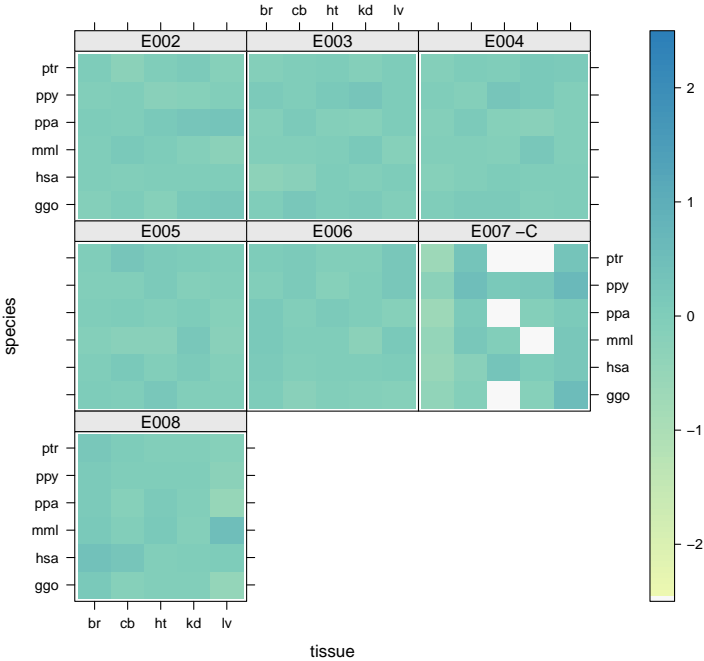

ENSG00000115252

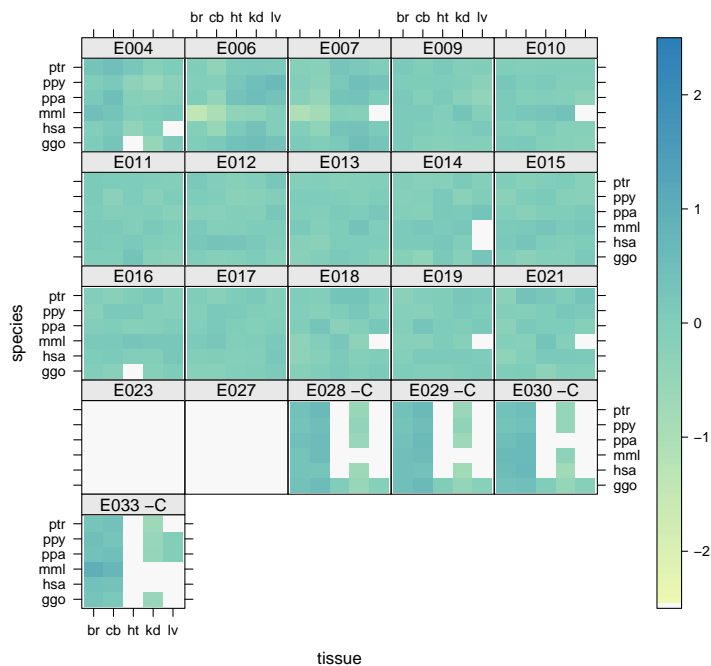

ENSG00000115266

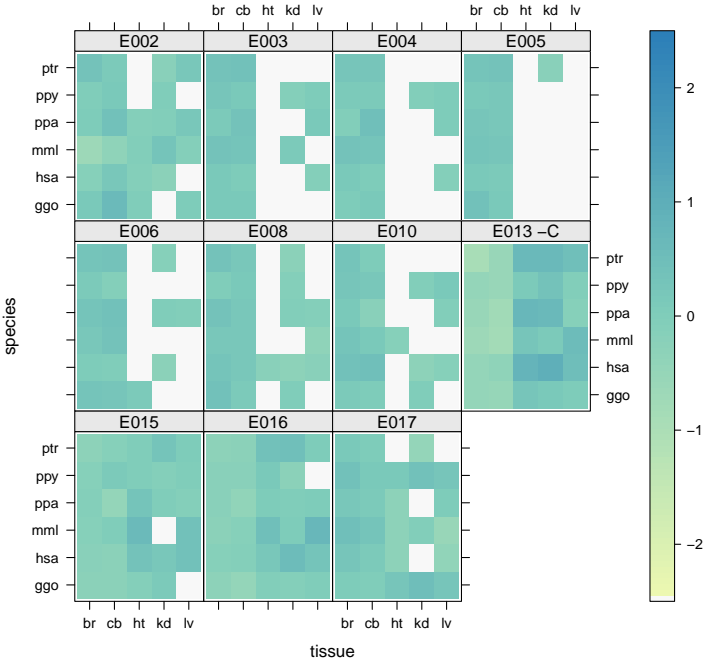

ENSG00000115282

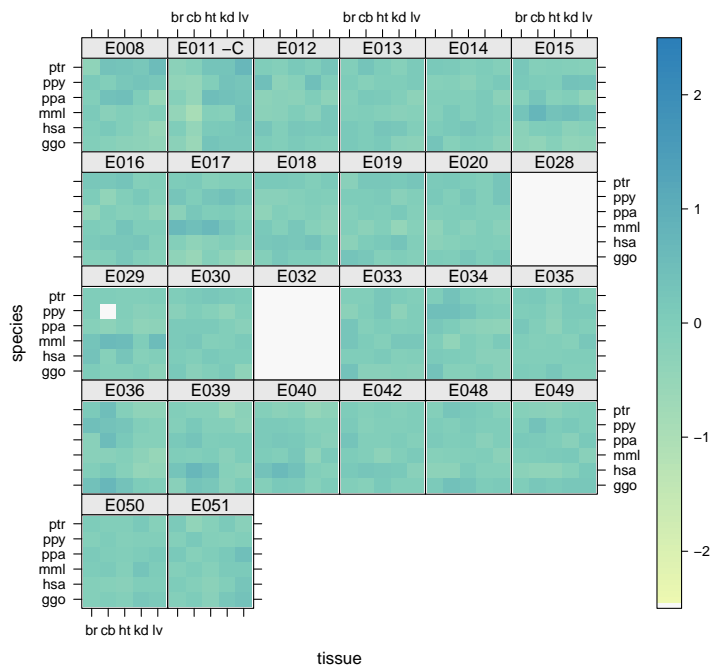

ENSG00000115306

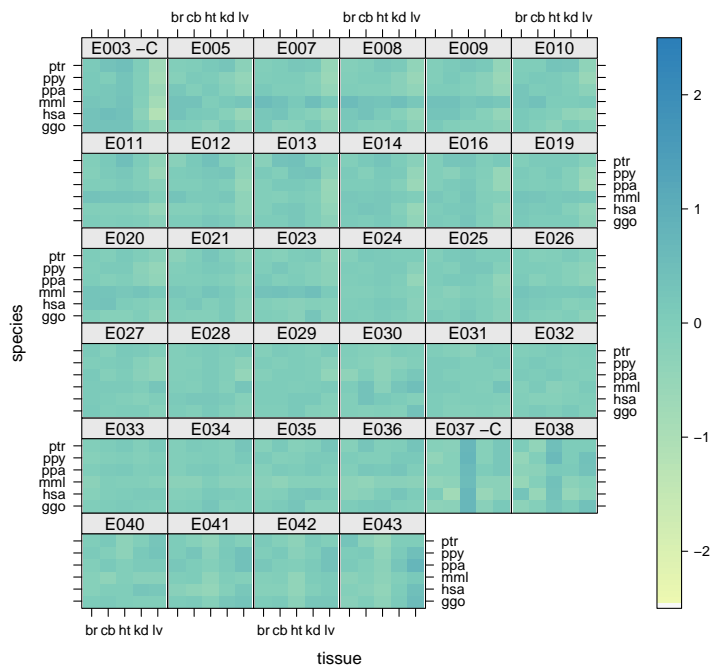





ENSG0000115414

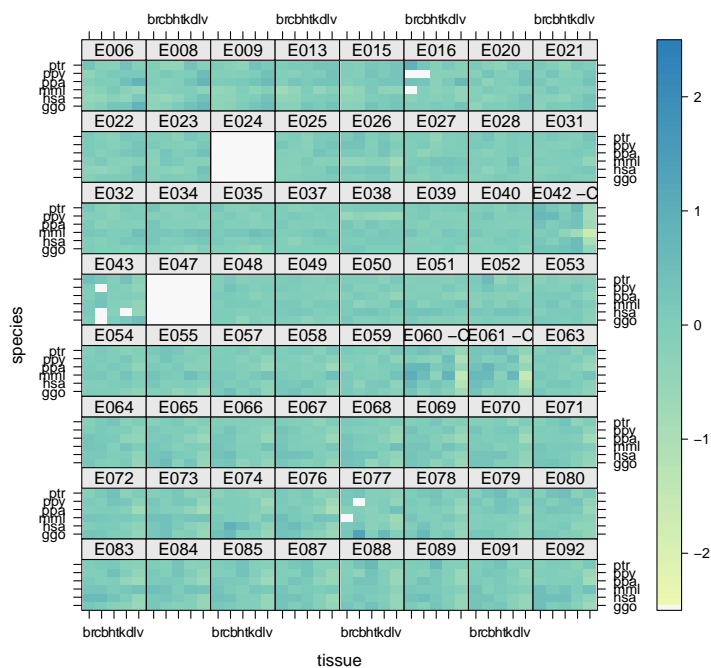

ENSG00000115825

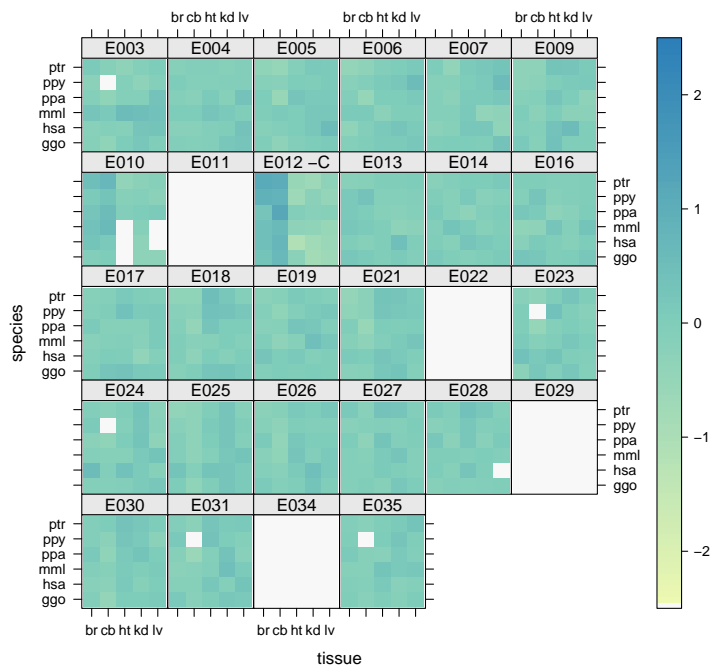

ENSG00000115839

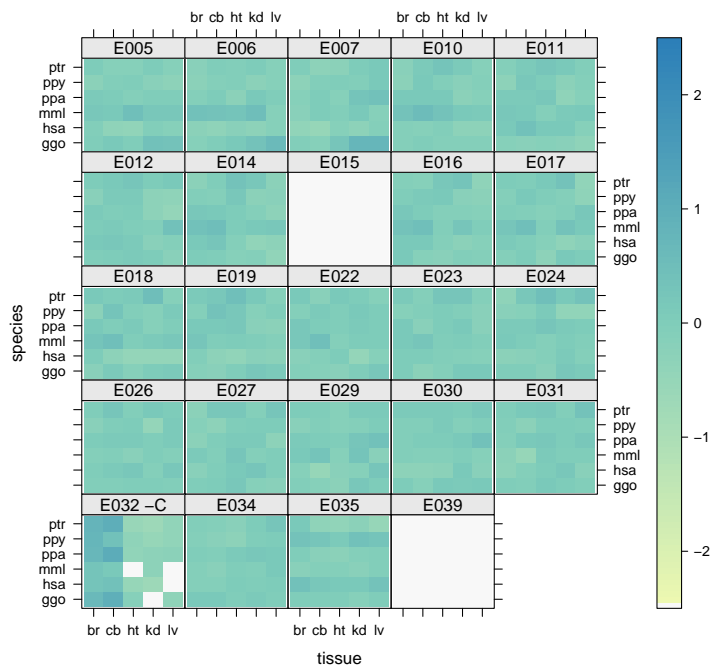

ENSG00000116151

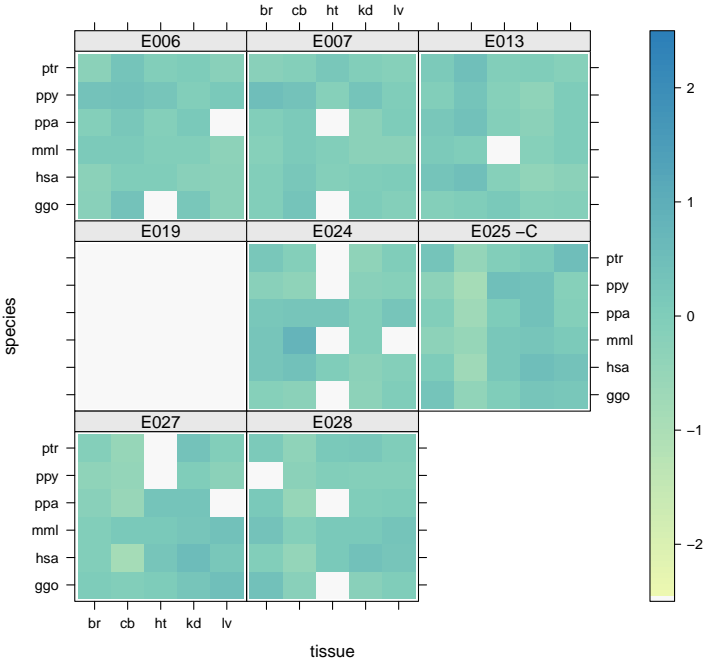









ENSG00000116586

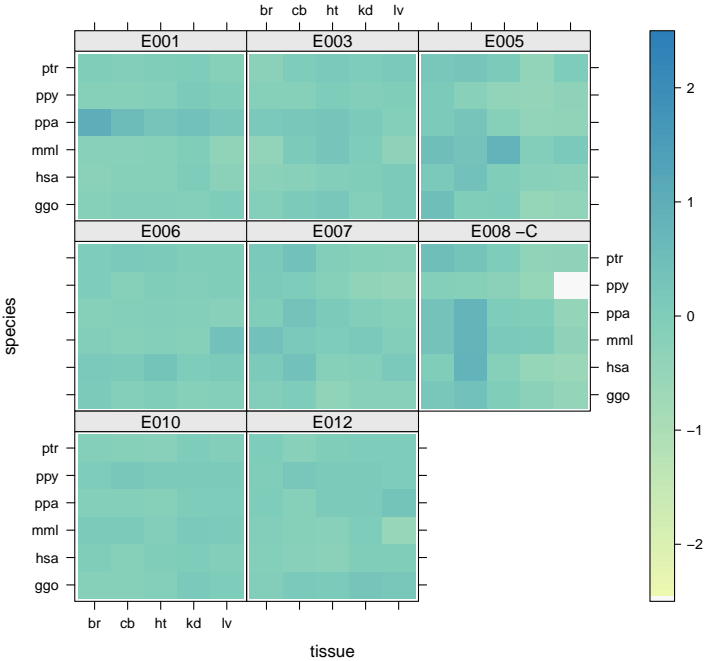

ENSG00000116604

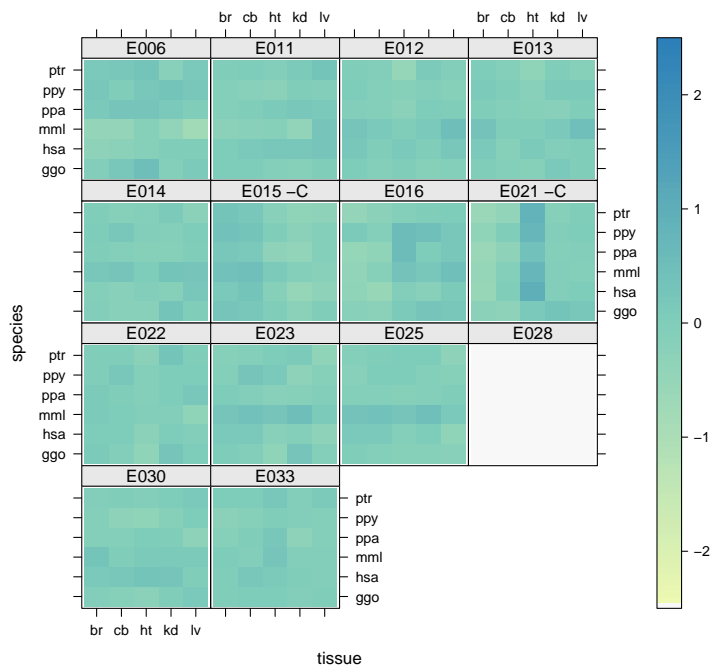

ENSG00000116667

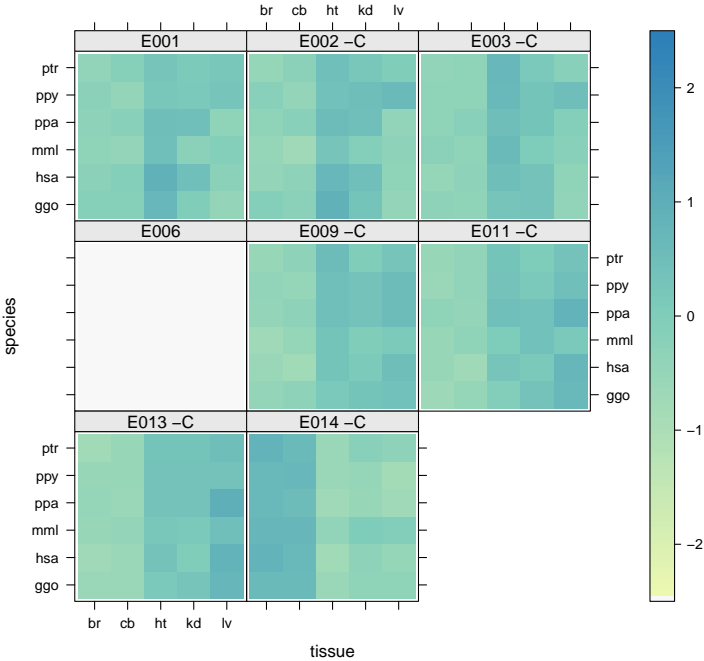

ENSG00000116690

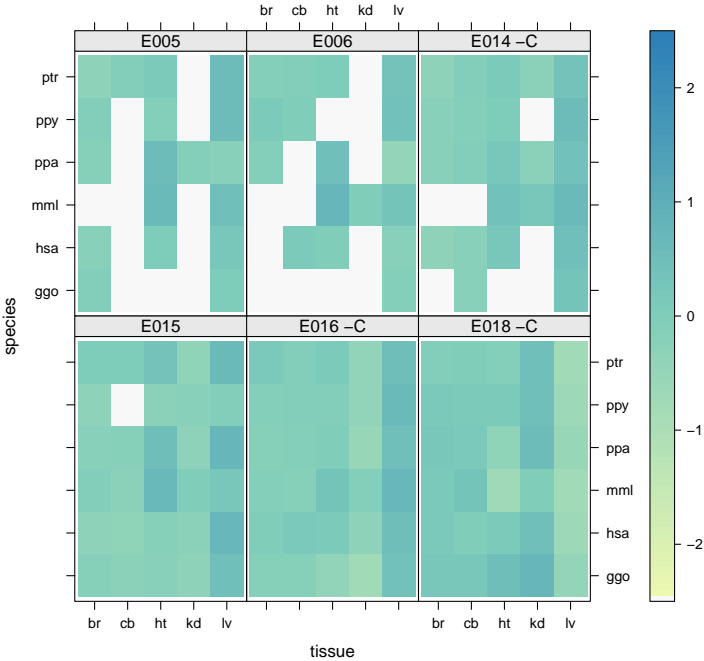

ENSG00000116698

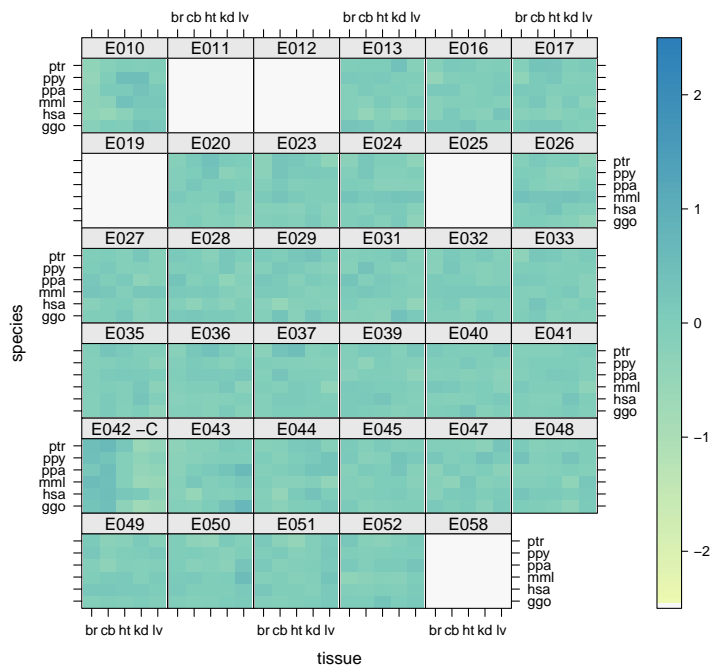

ENSG00000116731

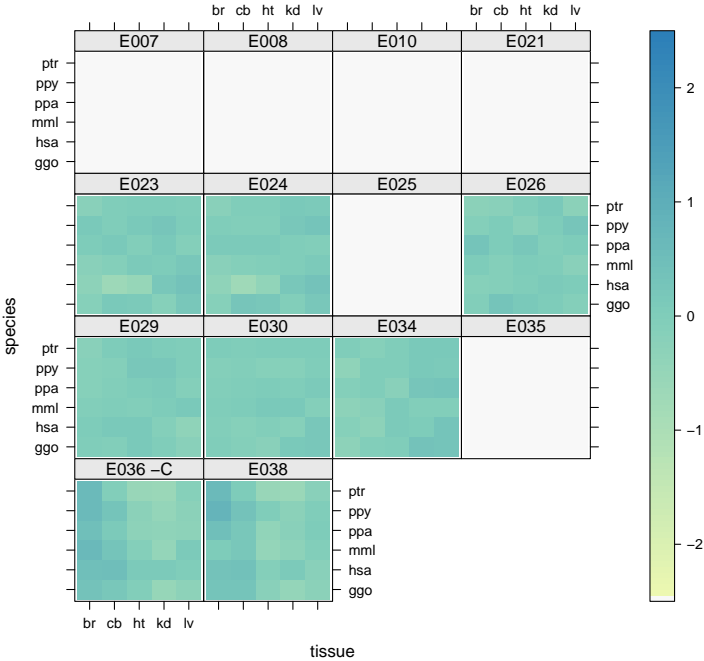

### ENSG0000117114

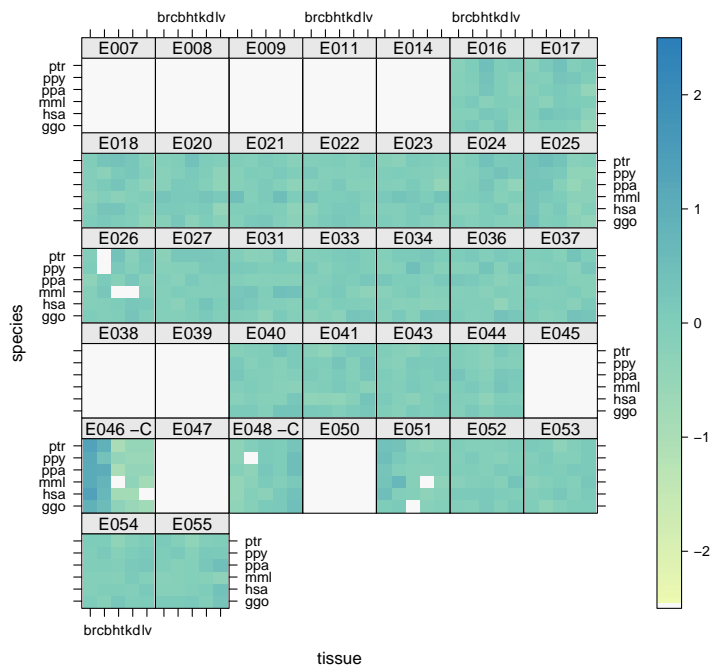

ENSG00000117139

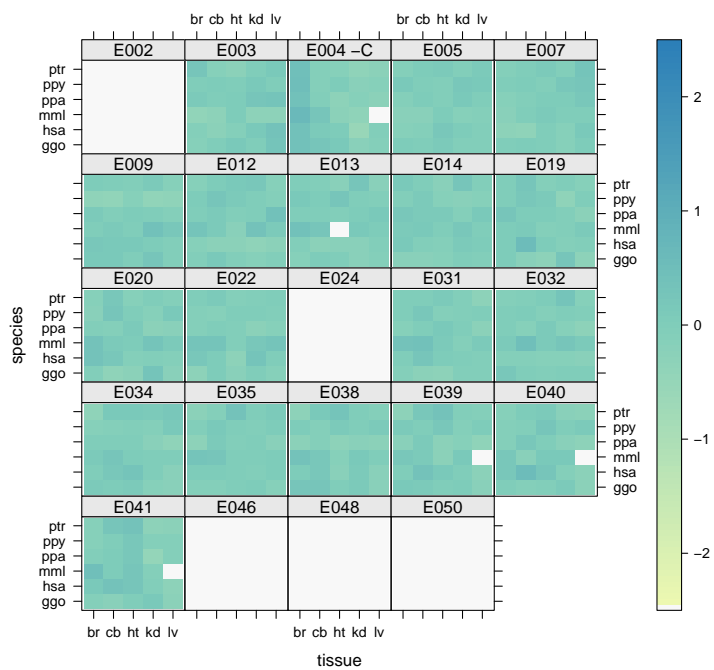











ENSG00000117625

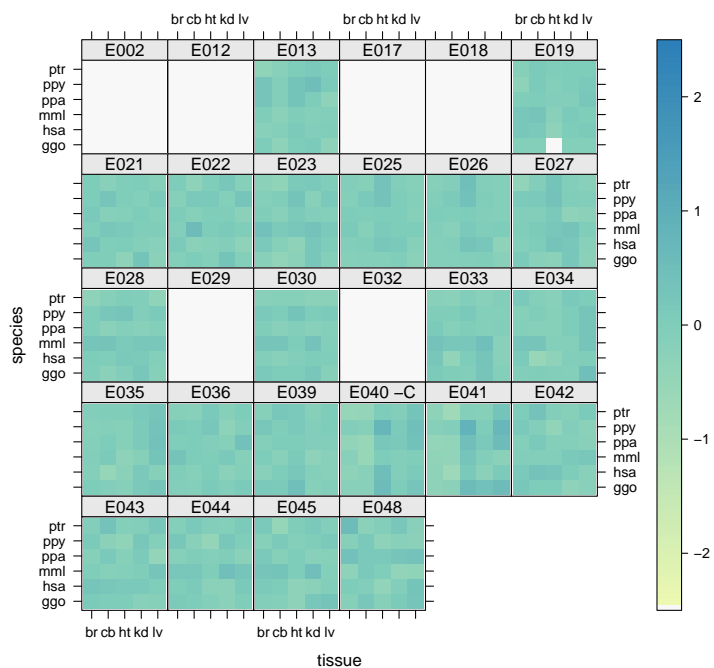

ENSG0000118515

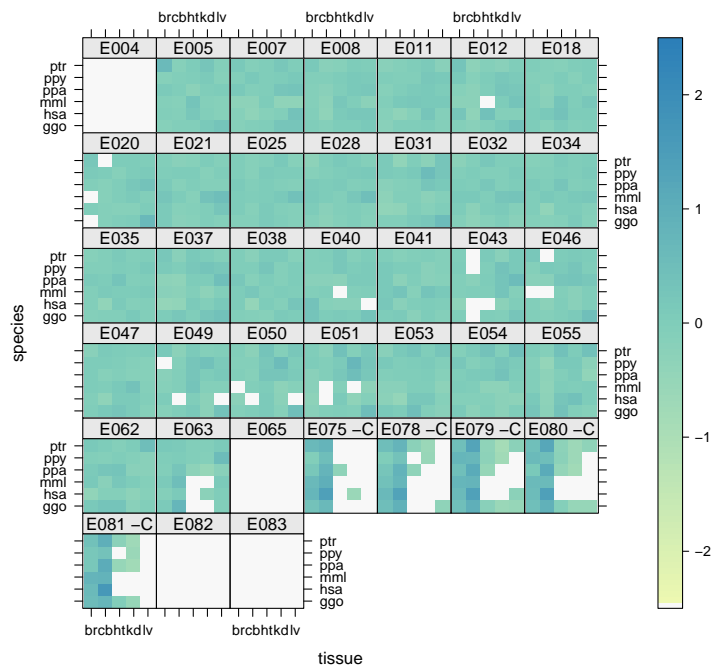







ENSG00000119408

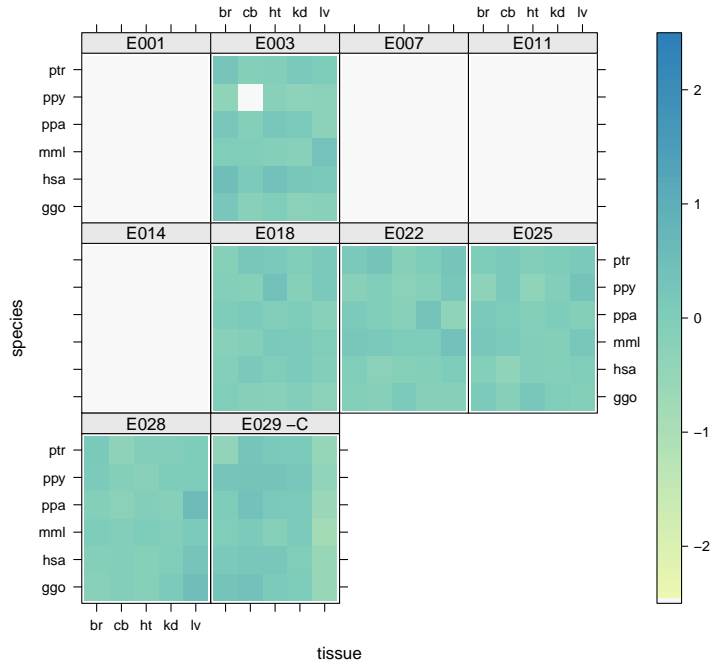

ENSG00000119522

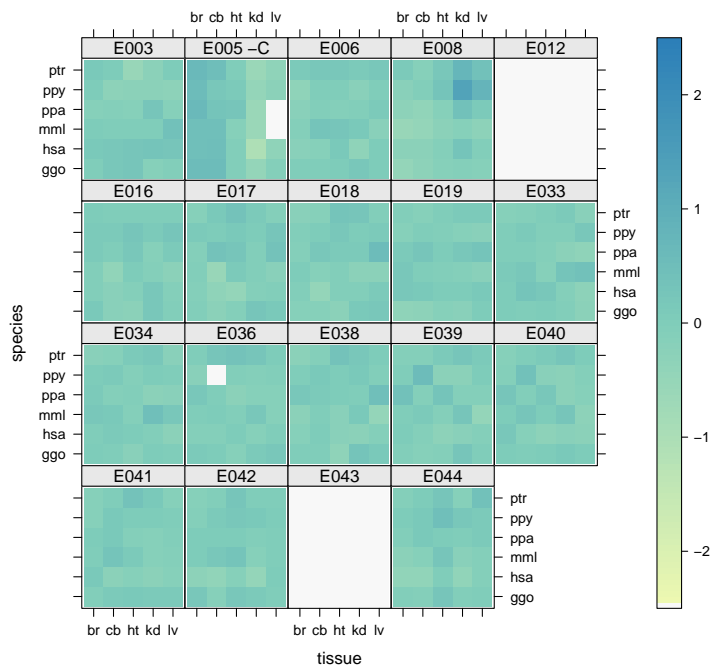

ENSG00000119698

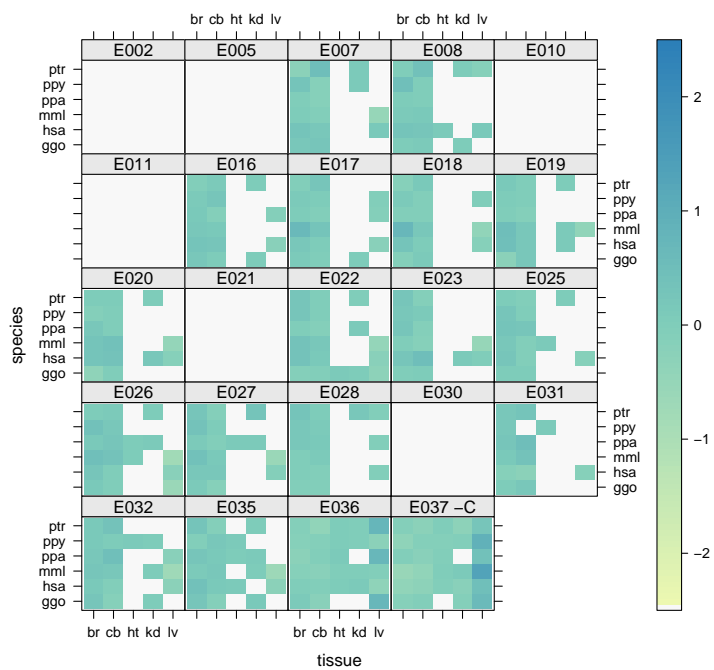





ENSG00000119844

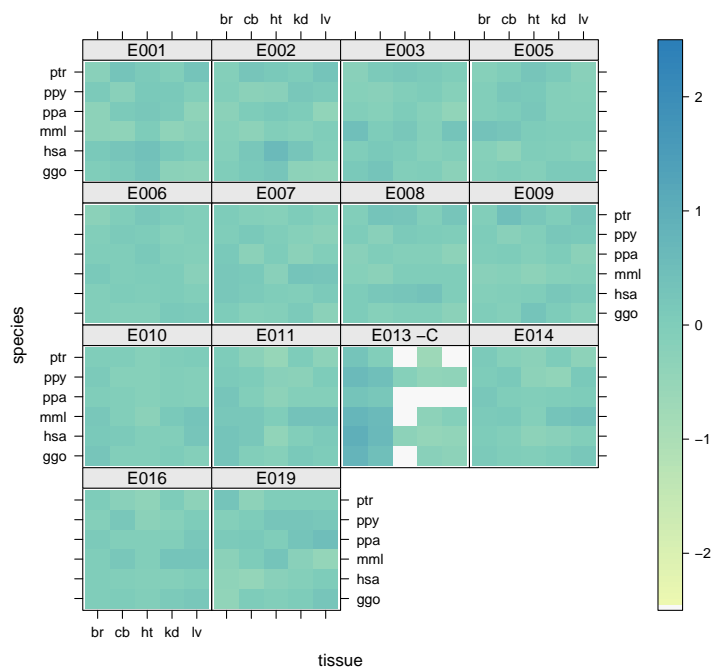

ENSG00000120533

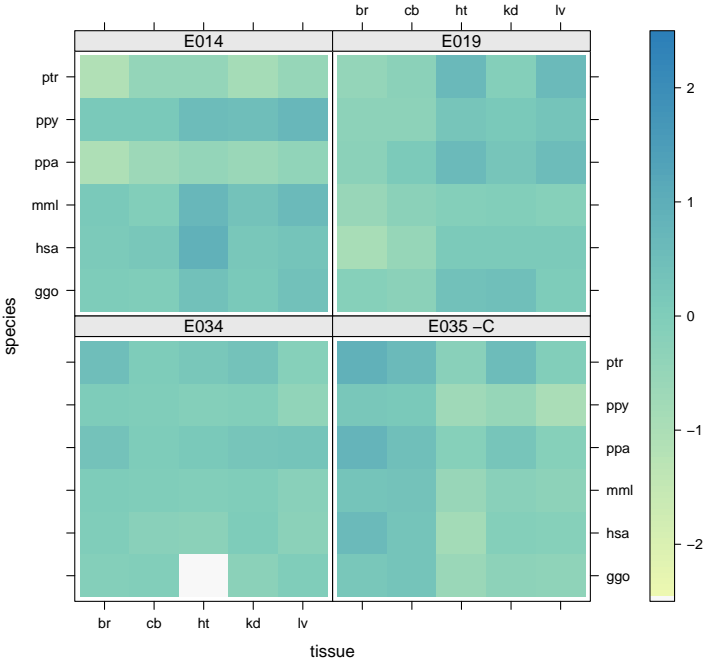

ENSG0000120868

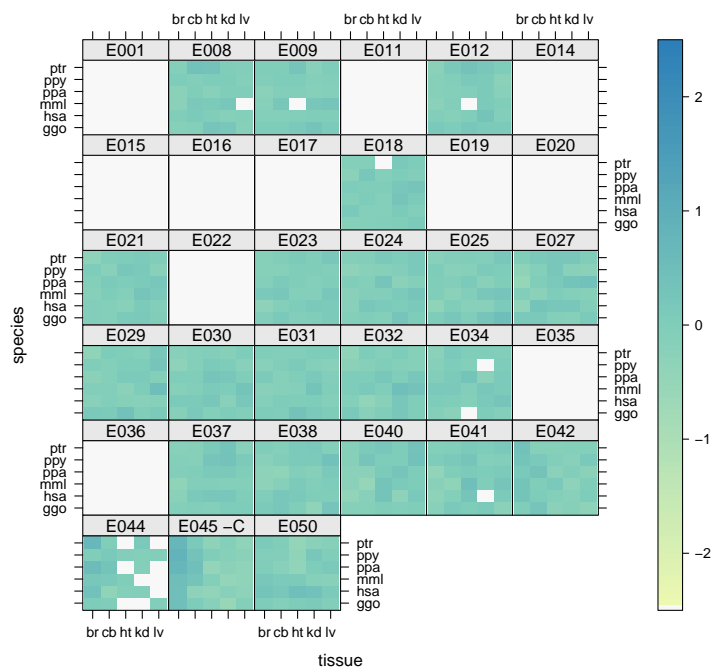





ENSG0000120896

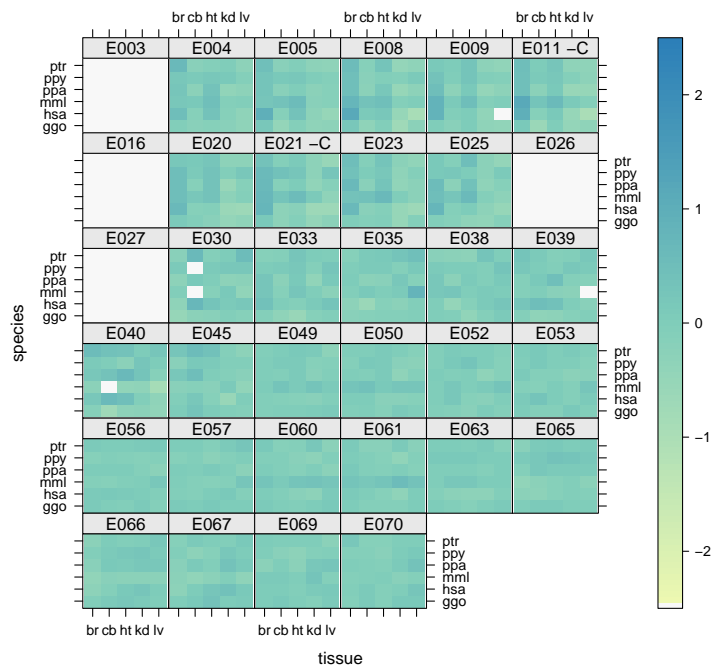

ENSG00000122490

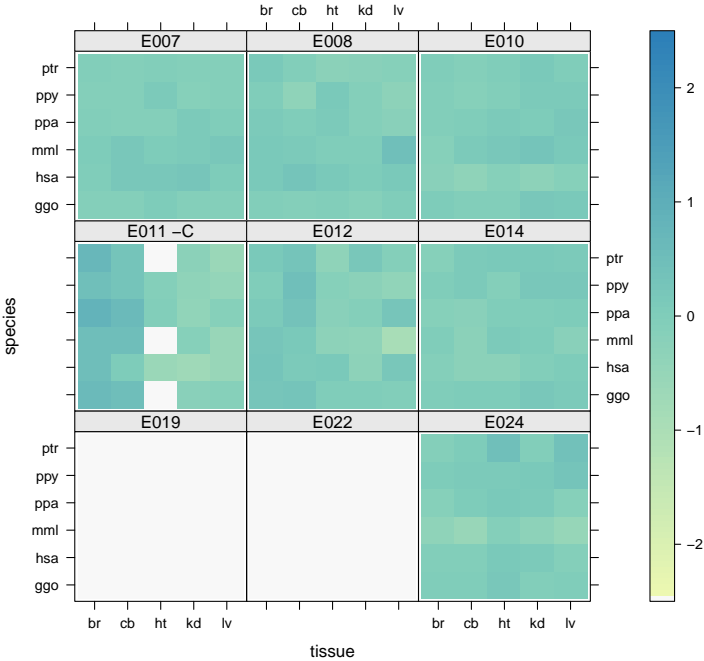

ENSG00000122515

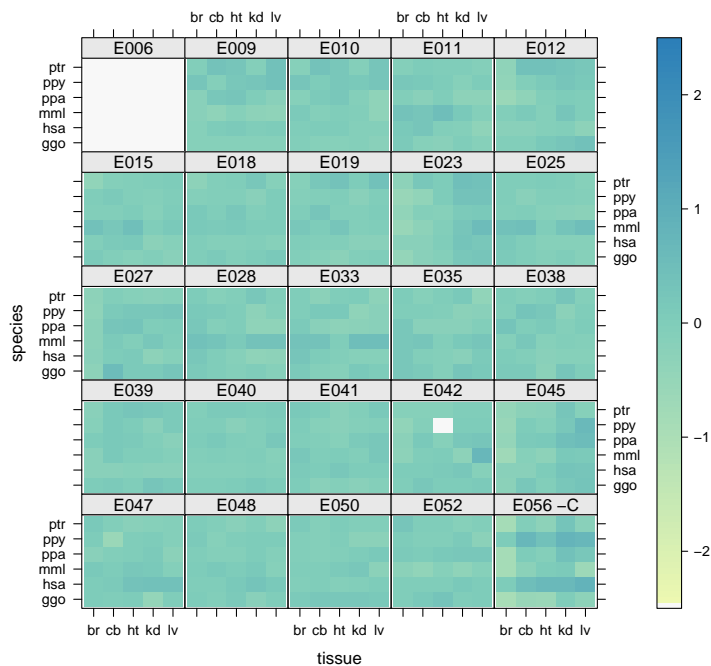



ENSG00000122786

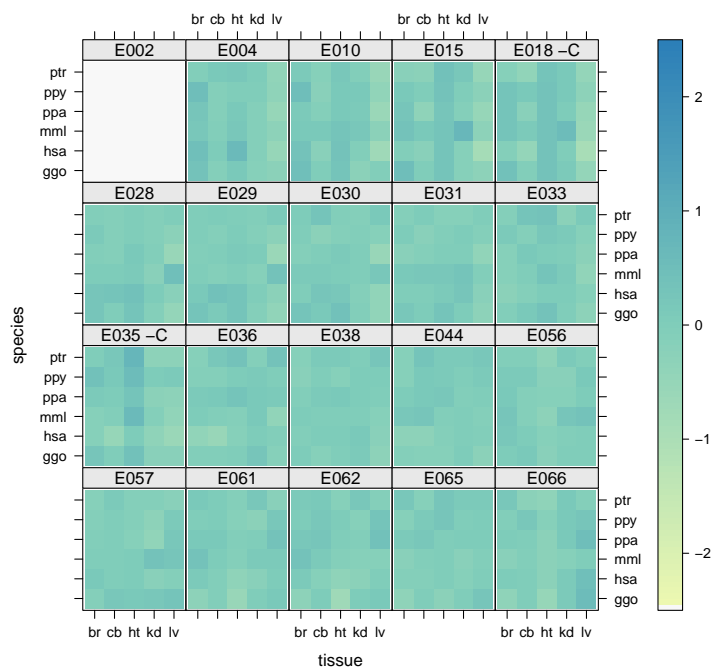

ENSG00000123064

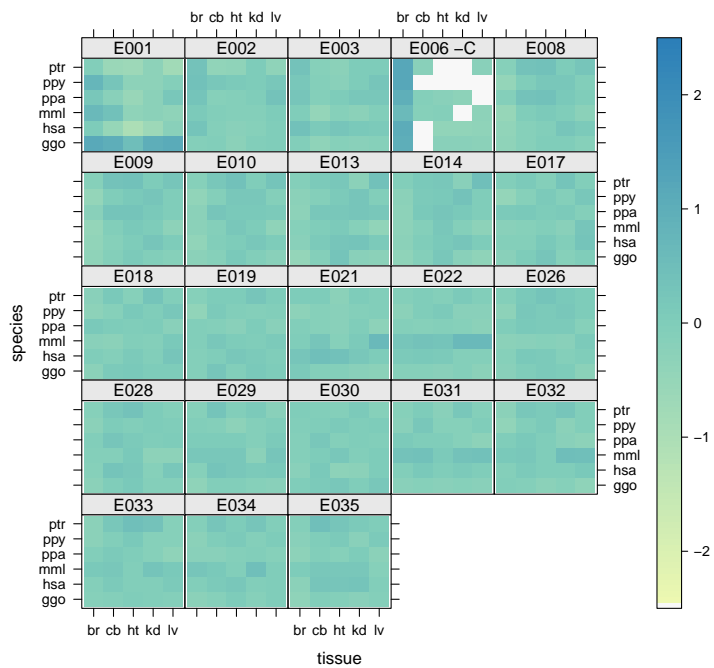

ENSG00000123358

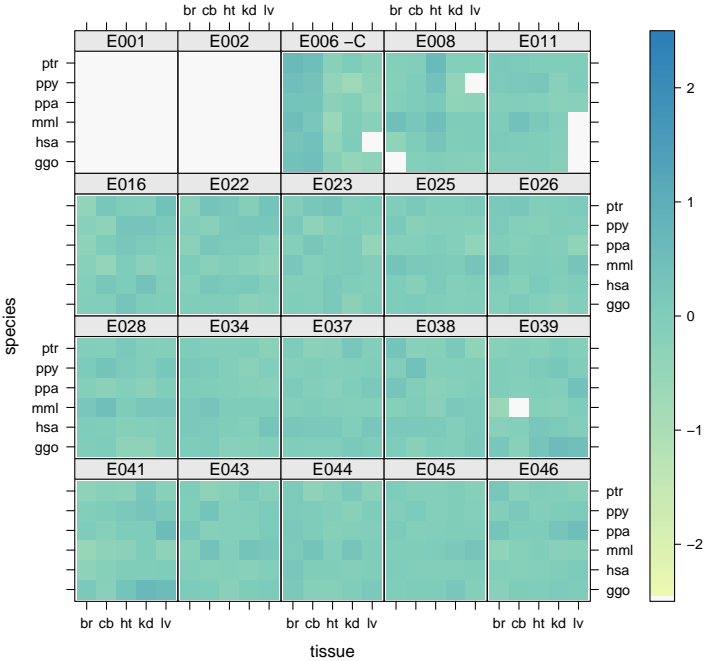



ENSG00000123360

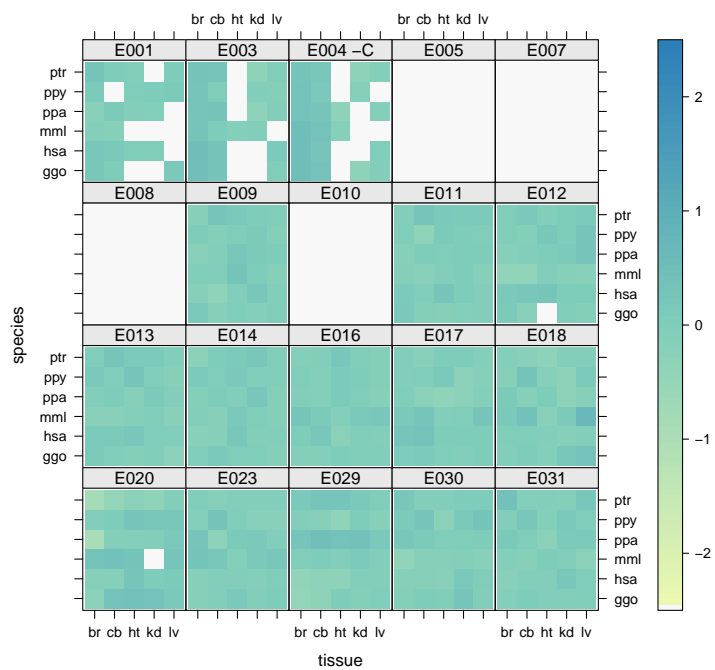

ENSG00000124164

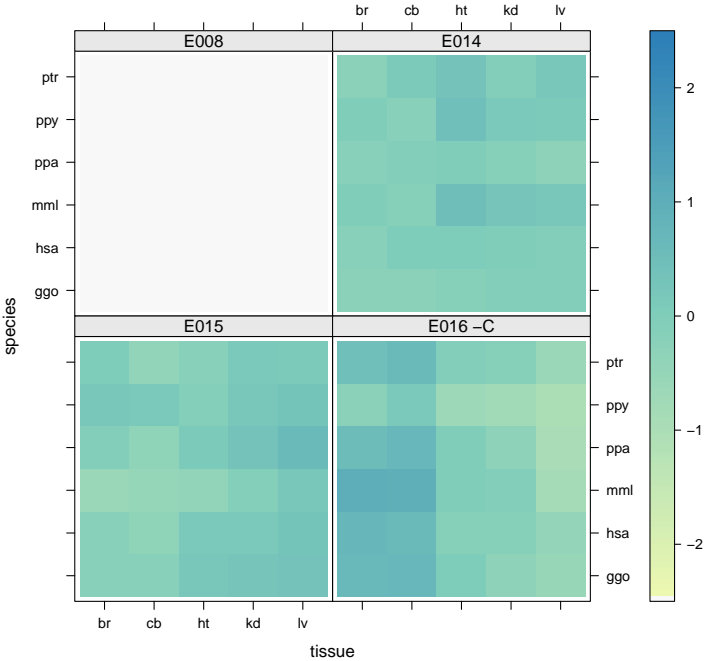





ENSG00000125744

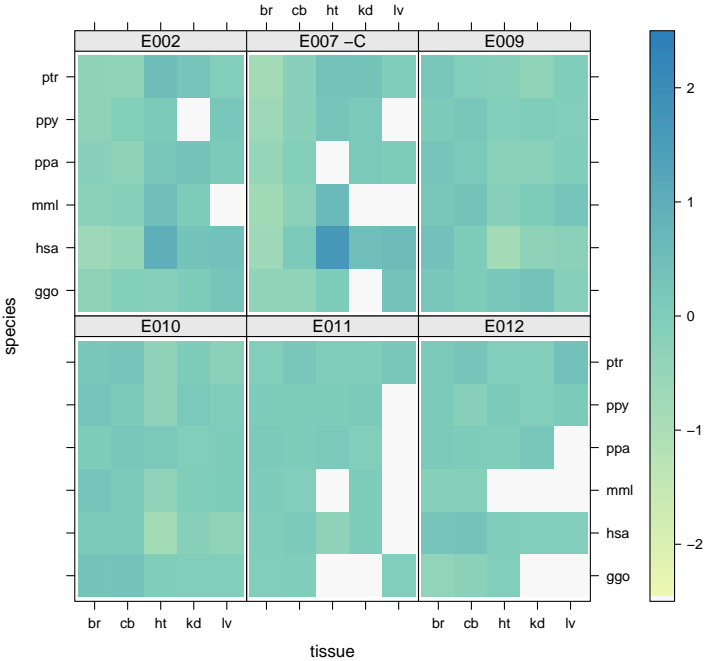

ENSG00000125746

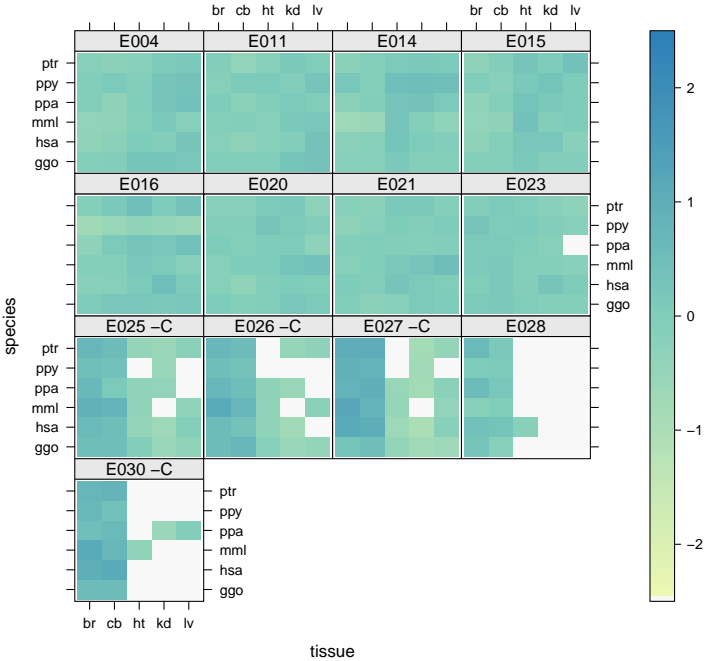

ENSG00000125814

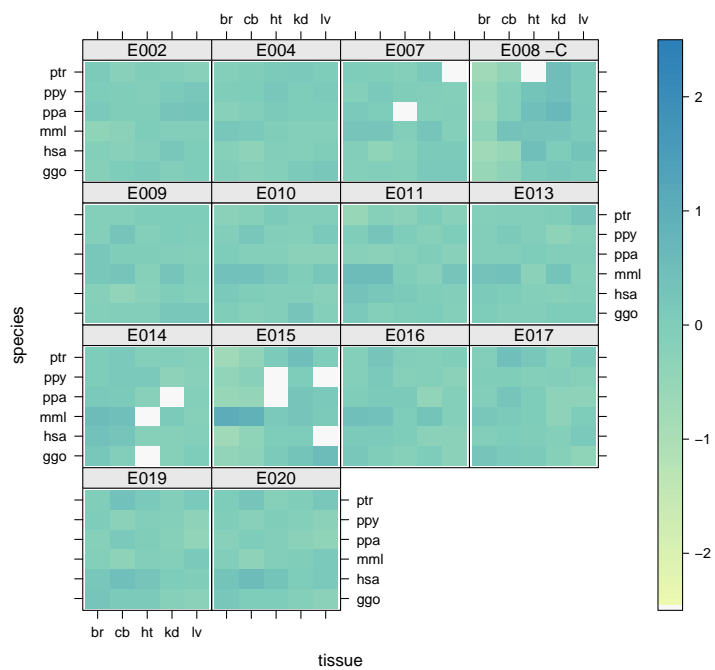





ENSG00000127241

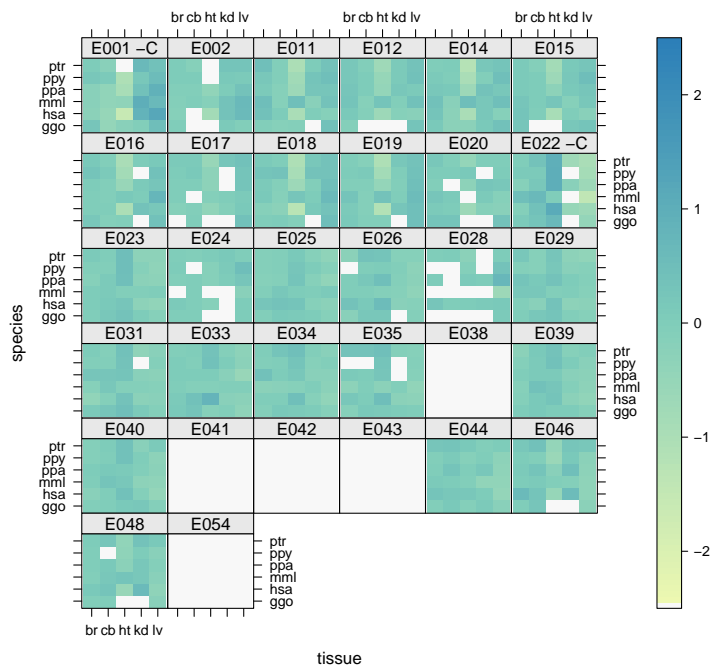

ENSG00000127423

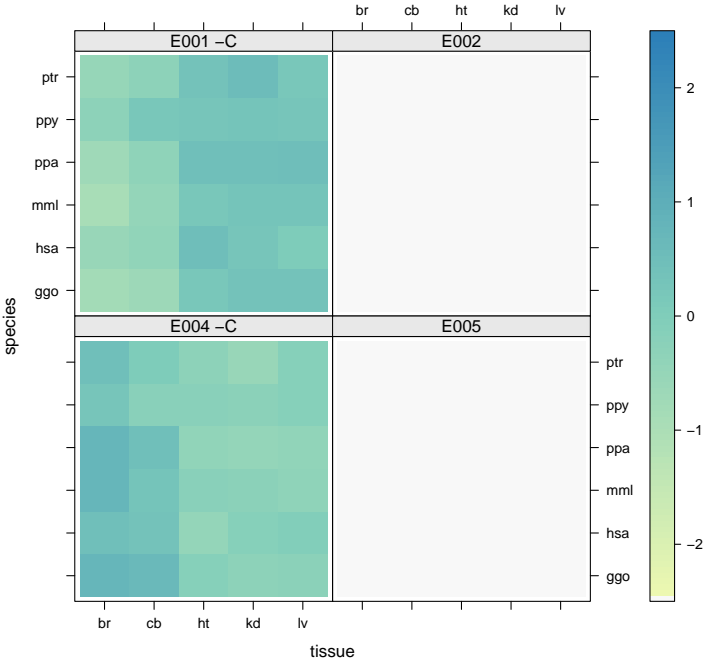







ENSG00000127838

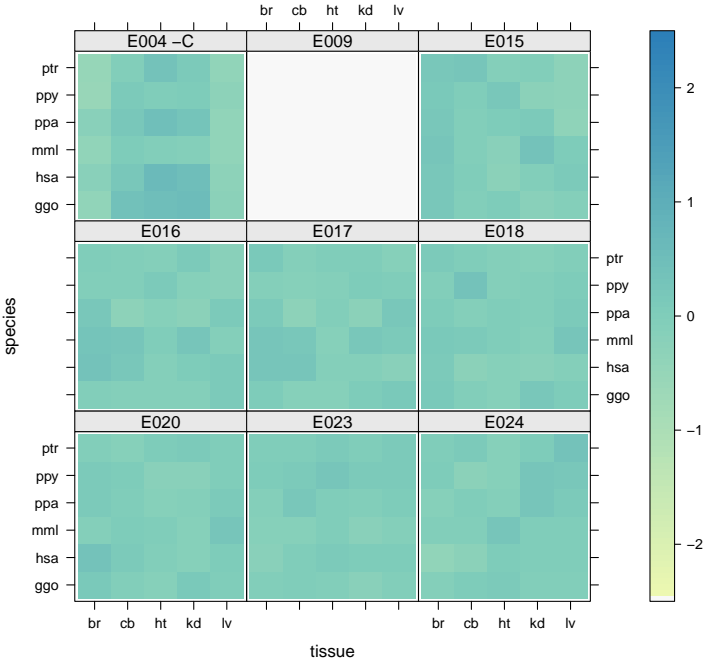



ENSG00000127990

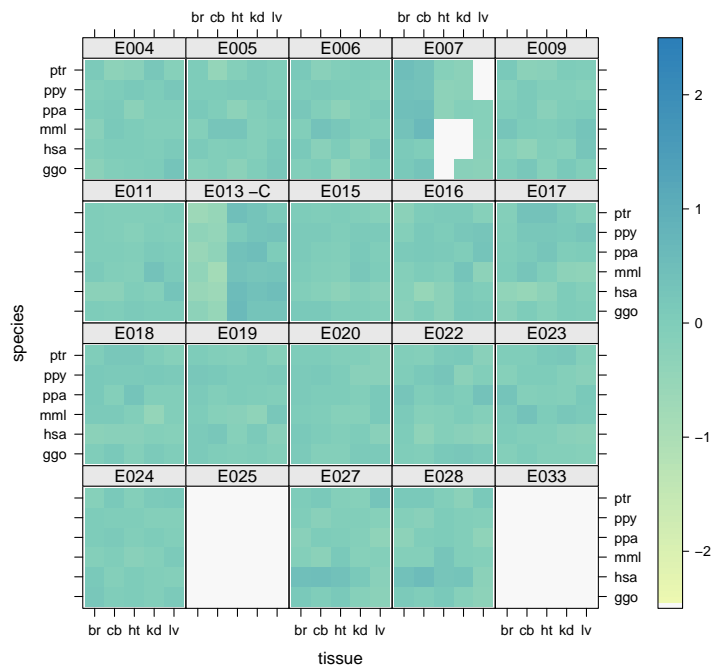



ENSG00000128596

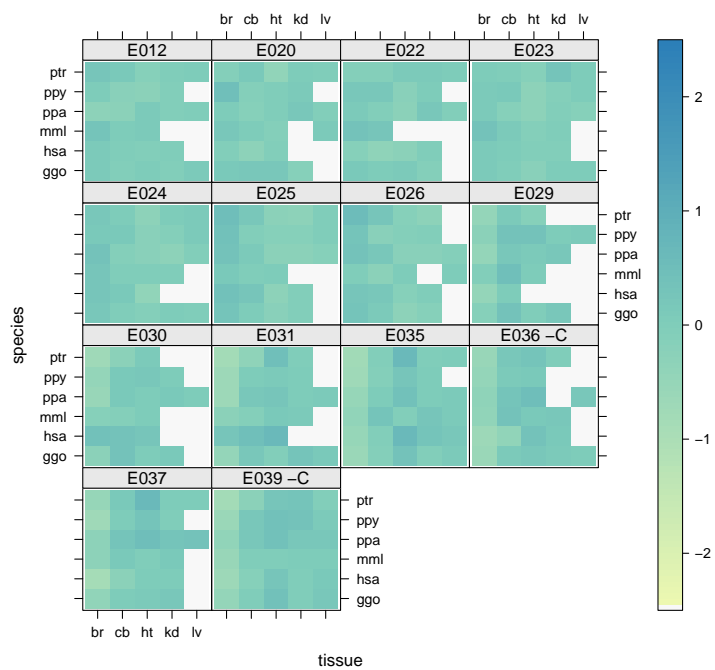

ENSG00000128656

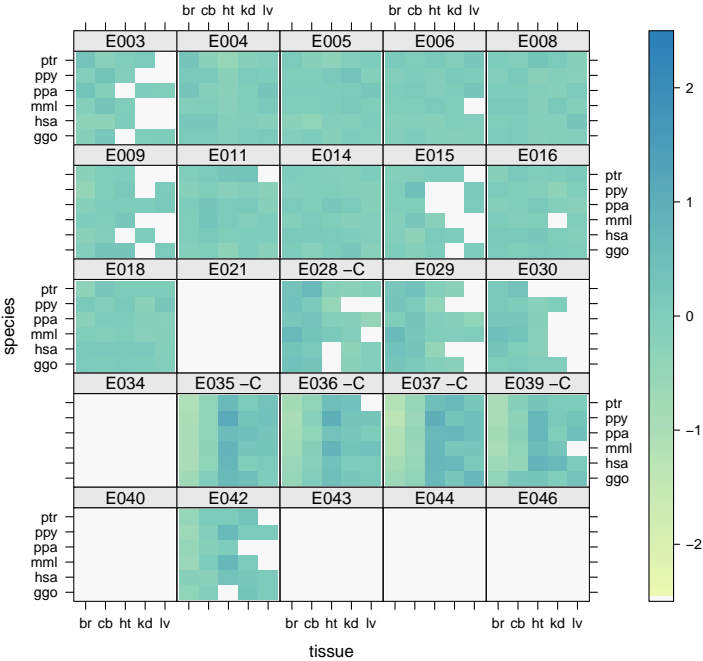

ENSG00000128928

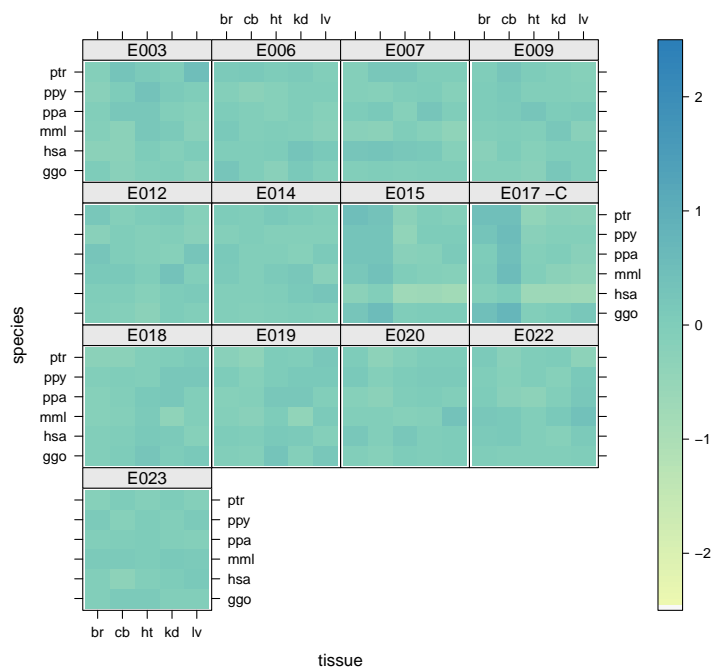

ENSG0000129116

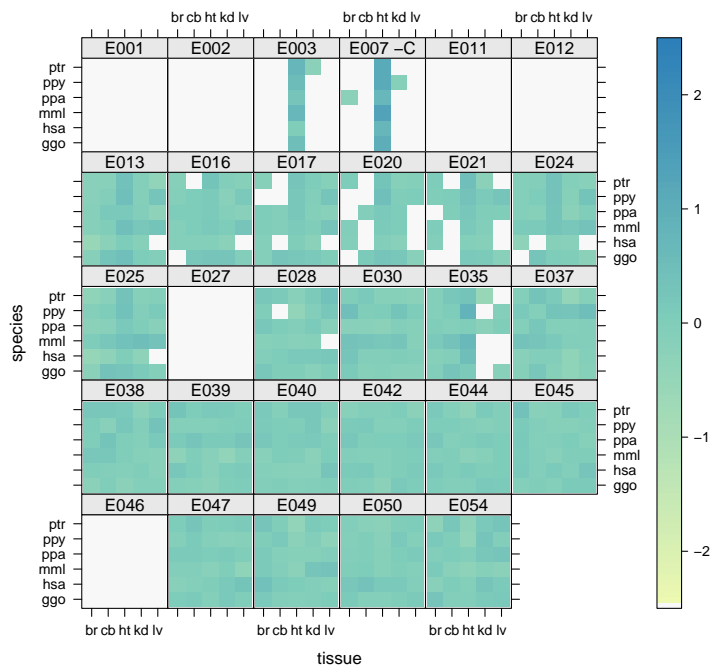





ENSG00000129595

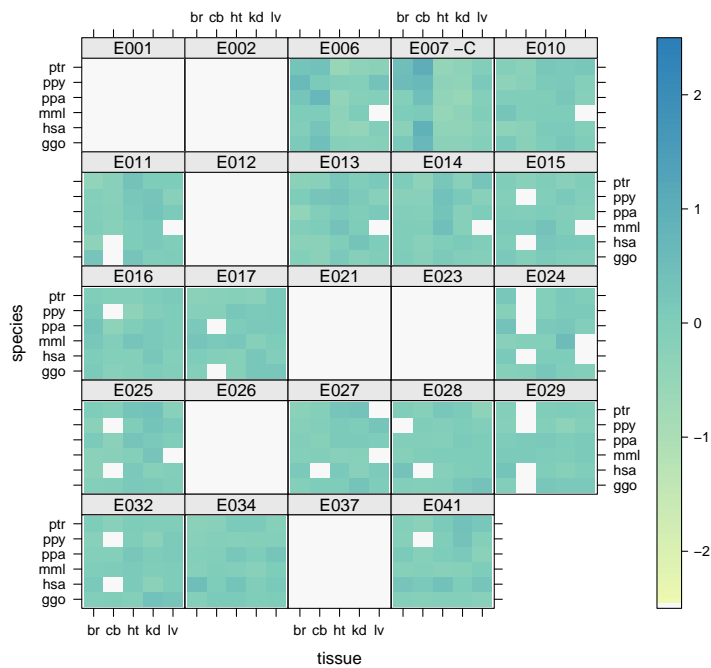

ENSG00000129636

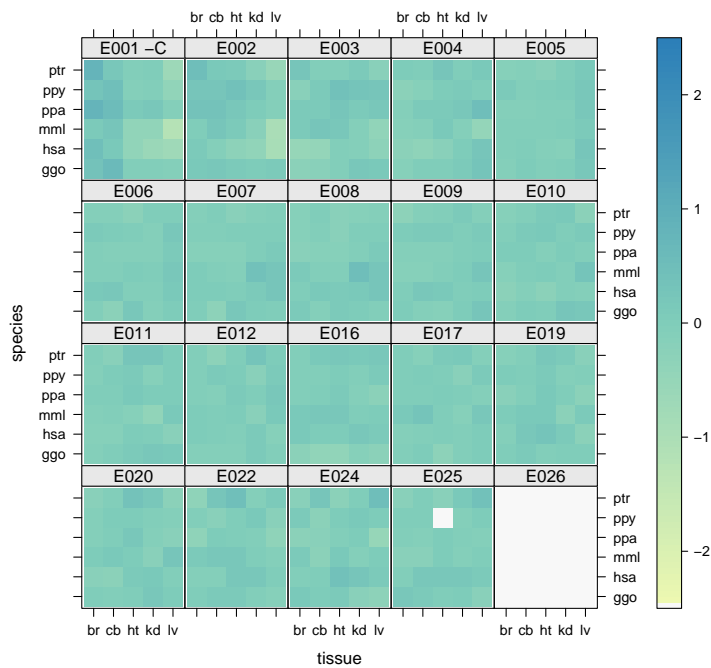



ENSG00000130226

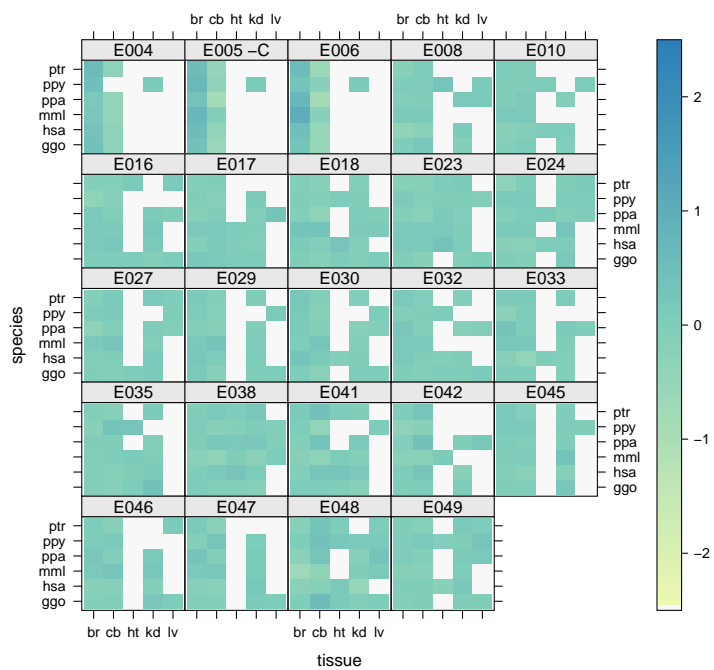



ENSG0000130396

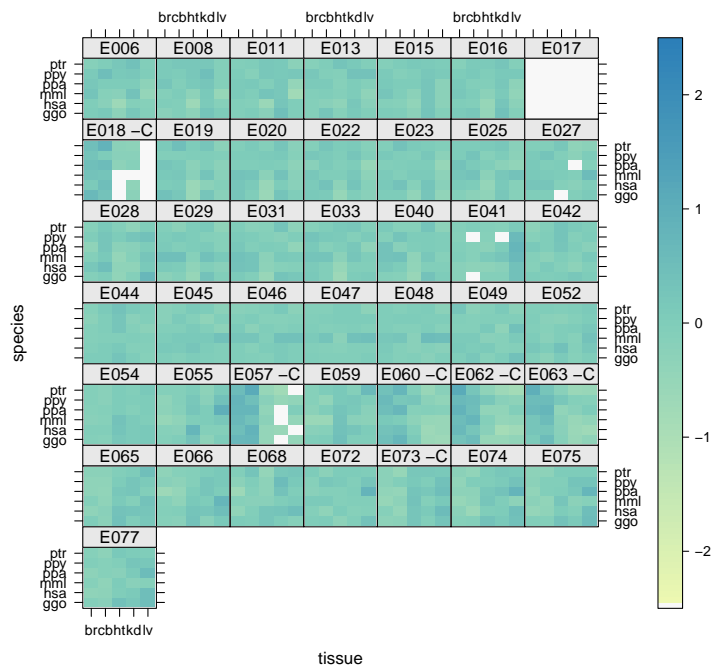

ENSG00000130402

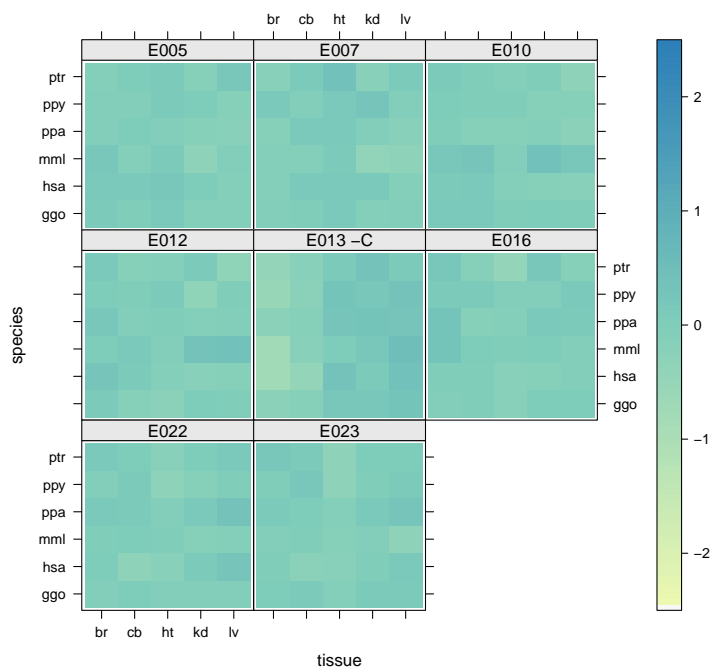

ENSG00000130770

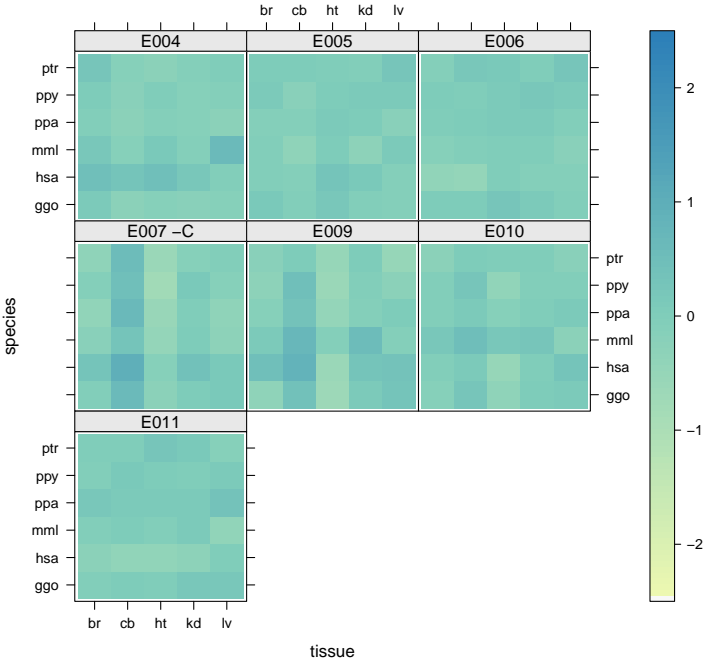

ENSG0000130939

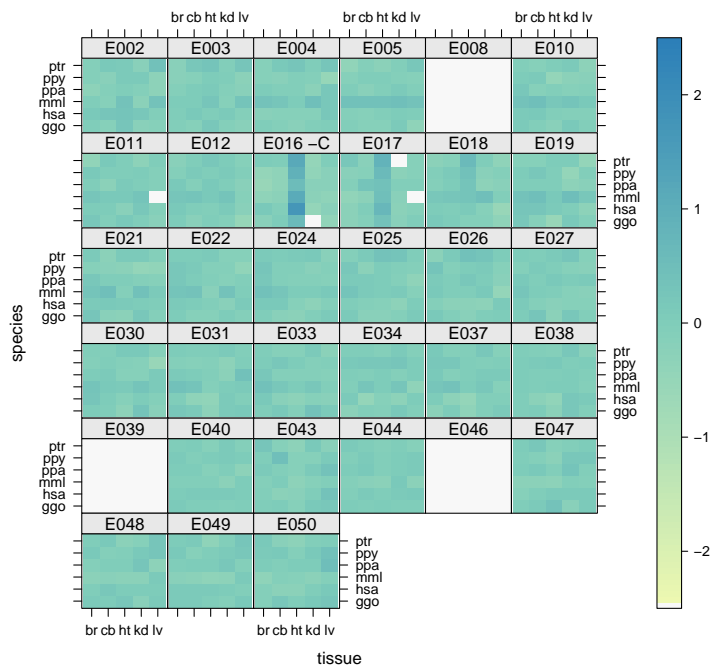



ENSG00000131187

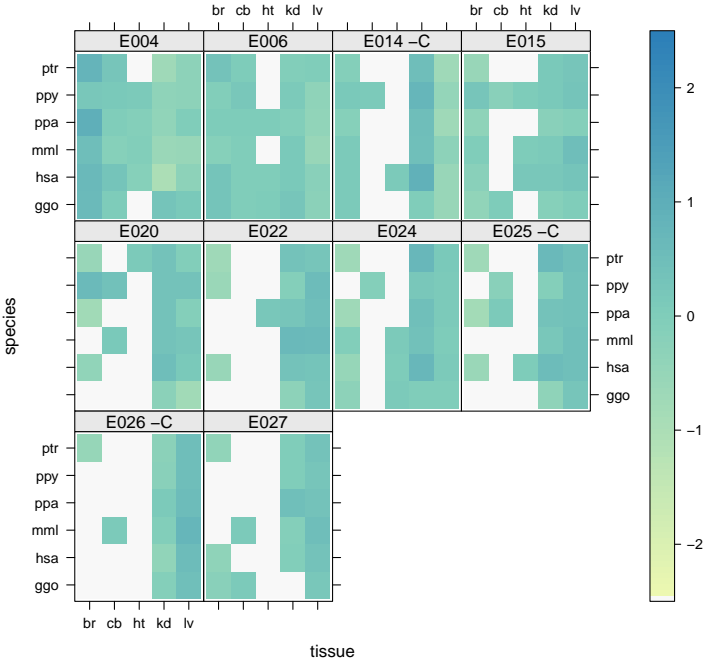



ENSG00000131242

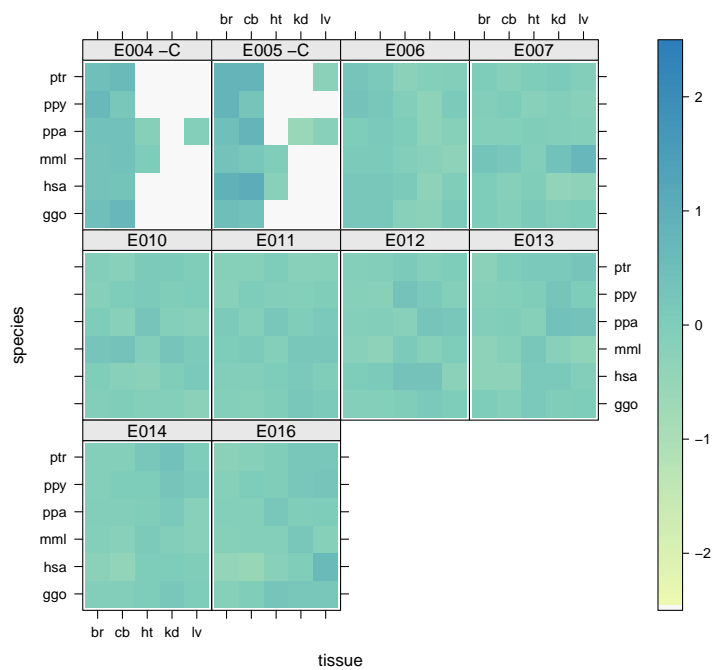



ENSG0000131626

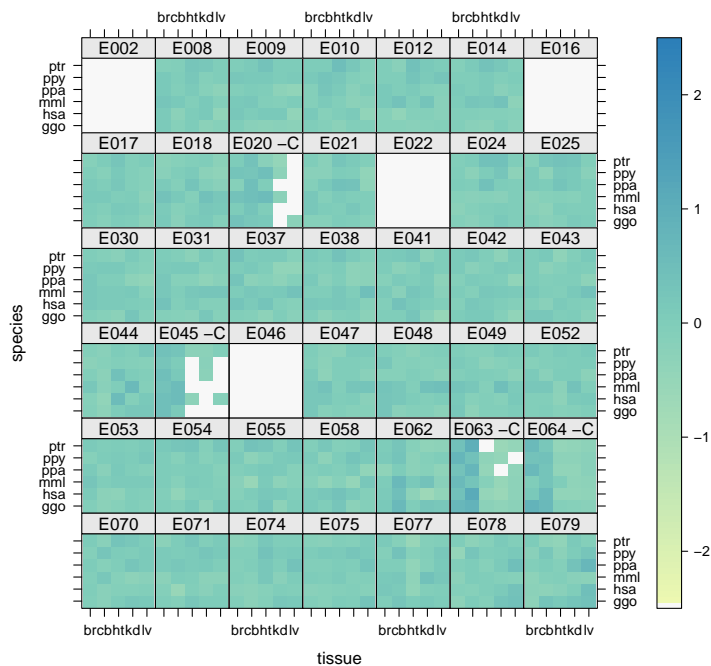

ENSG00000131730

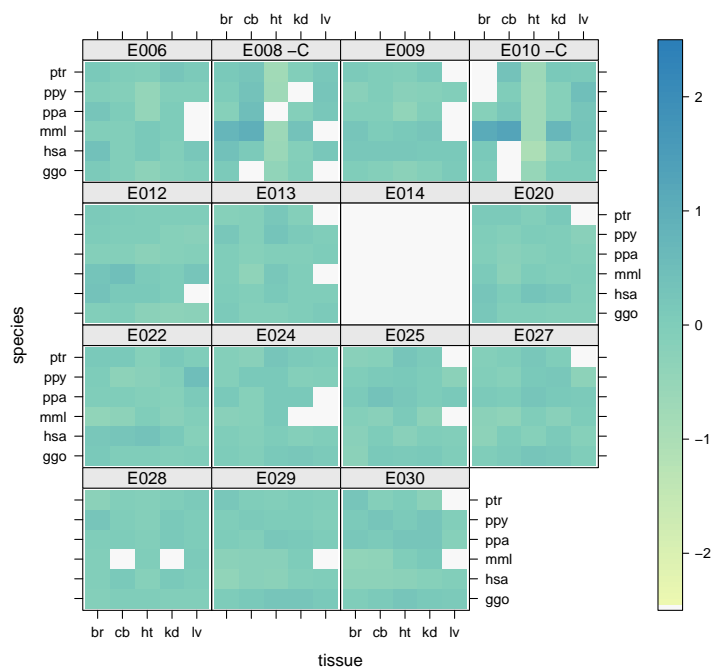

ENSG00000131759

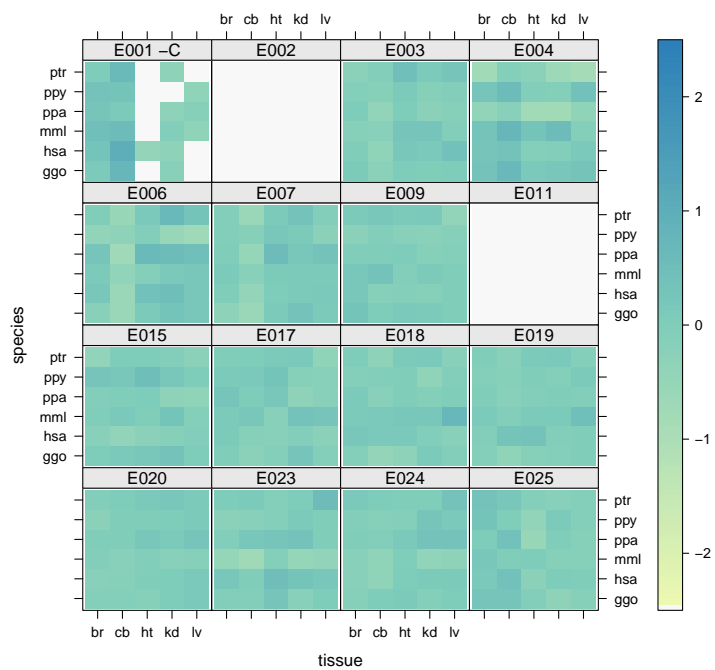

ENSG00000131781

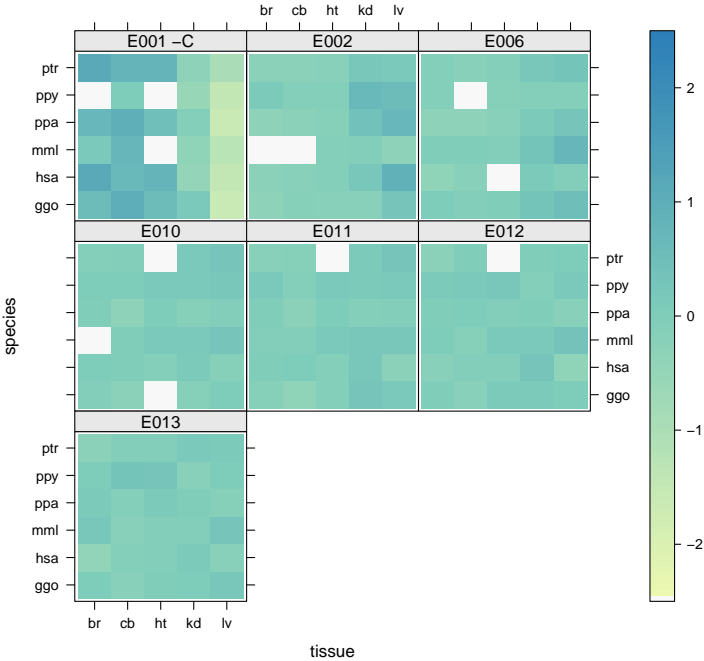

ENSG00000132164

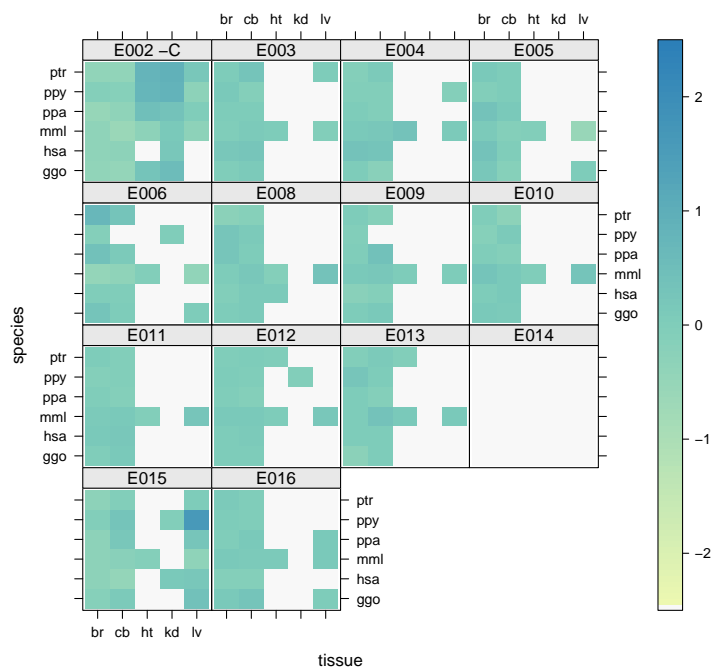

ENSG00000132589

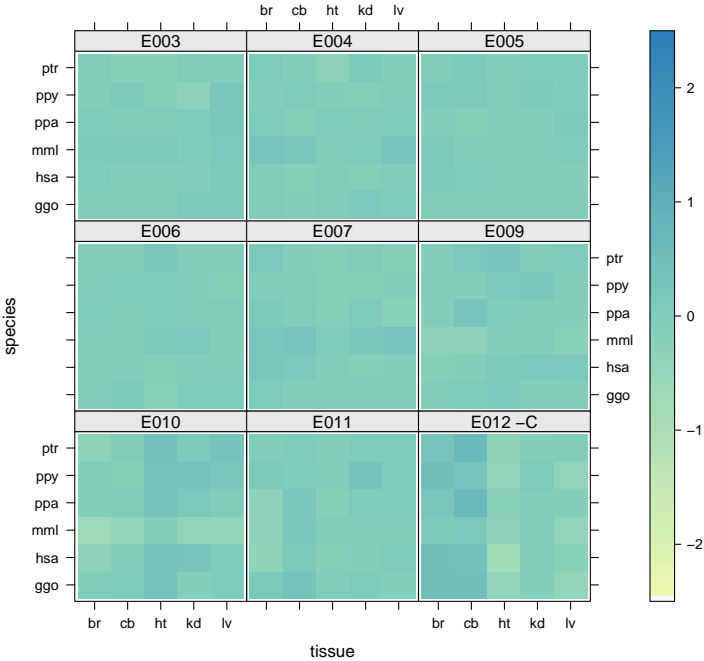



ENSG00000132639

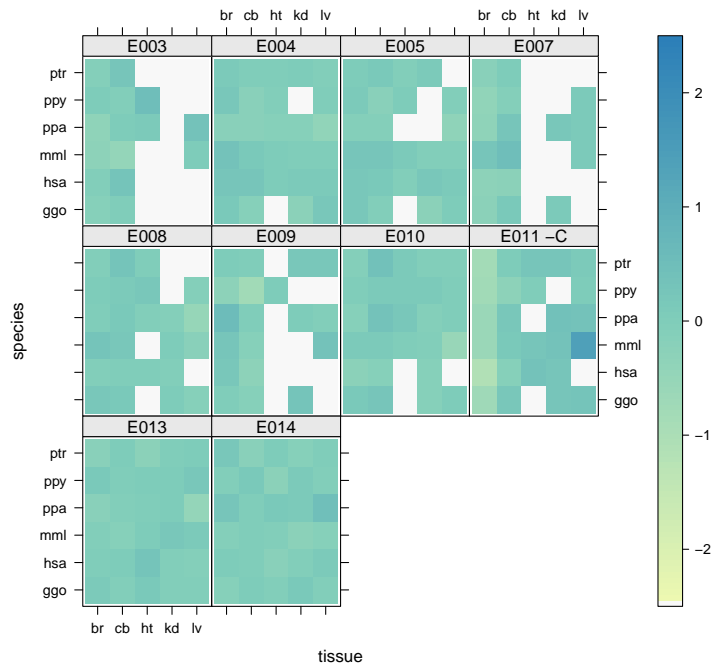

ENSG0000132694

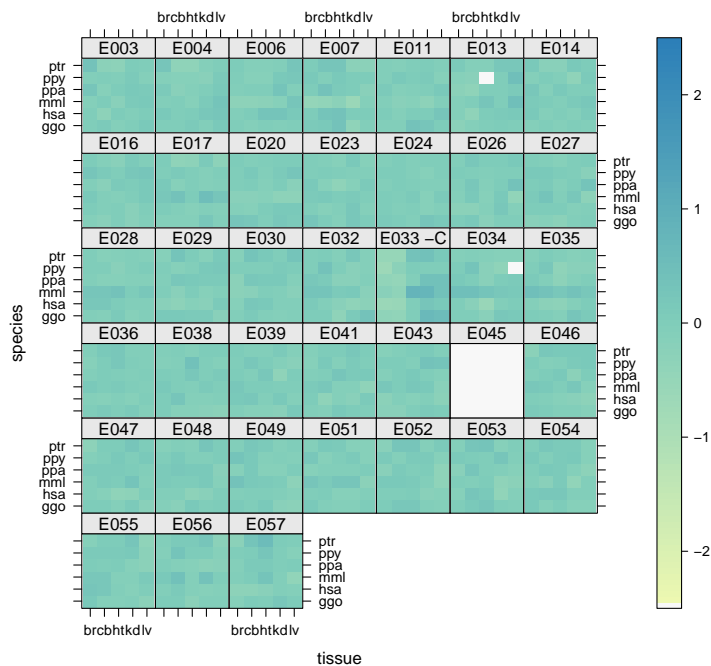





ENSG0000133026

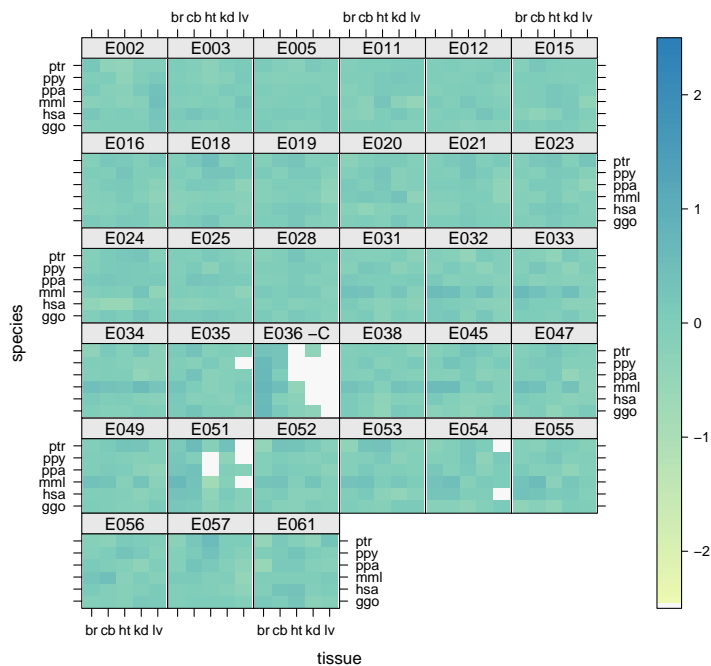

ENSG00000133027

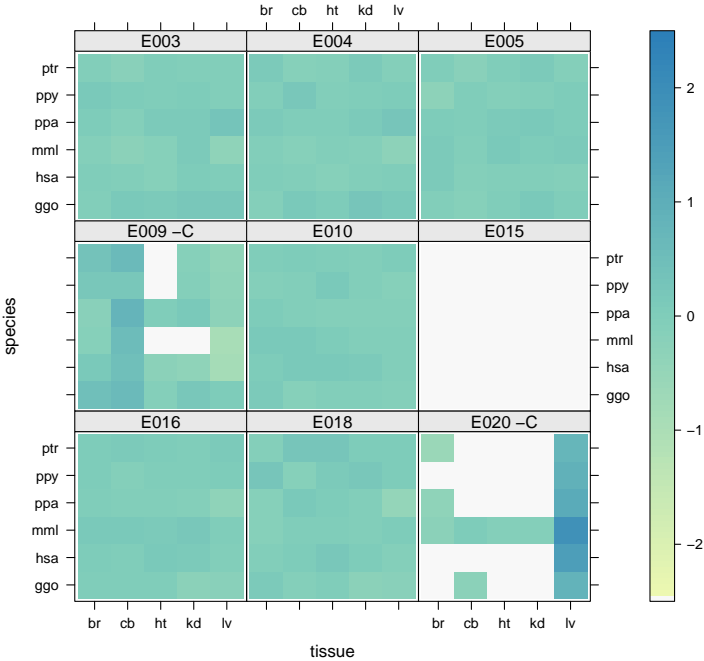

ENSG00000133083

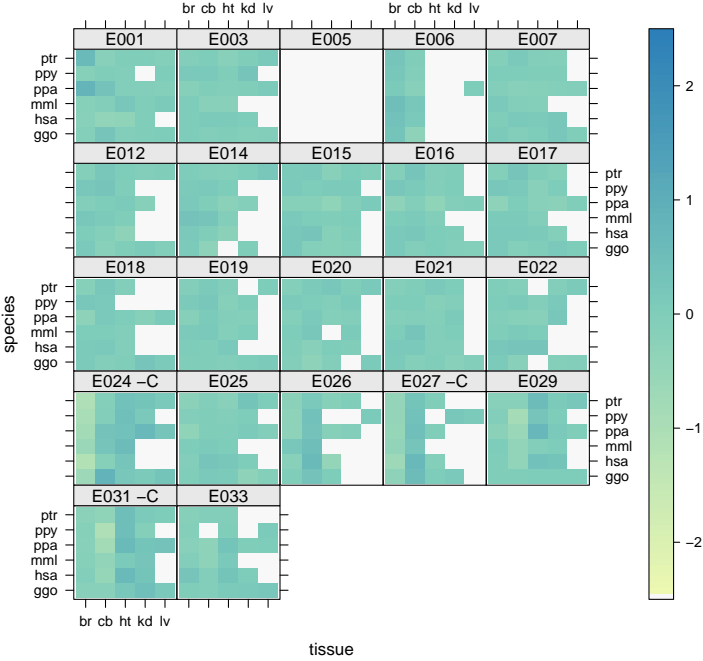

ENSG00000133318

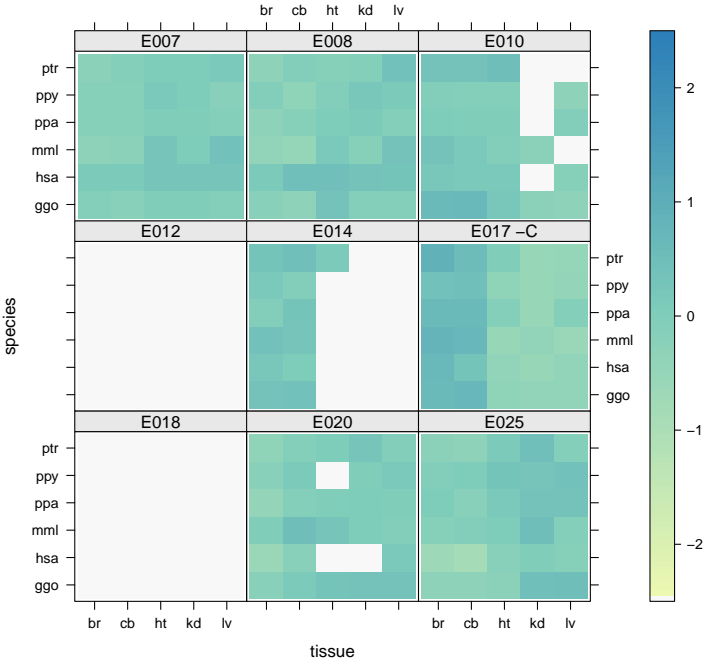



ENSG00000133574

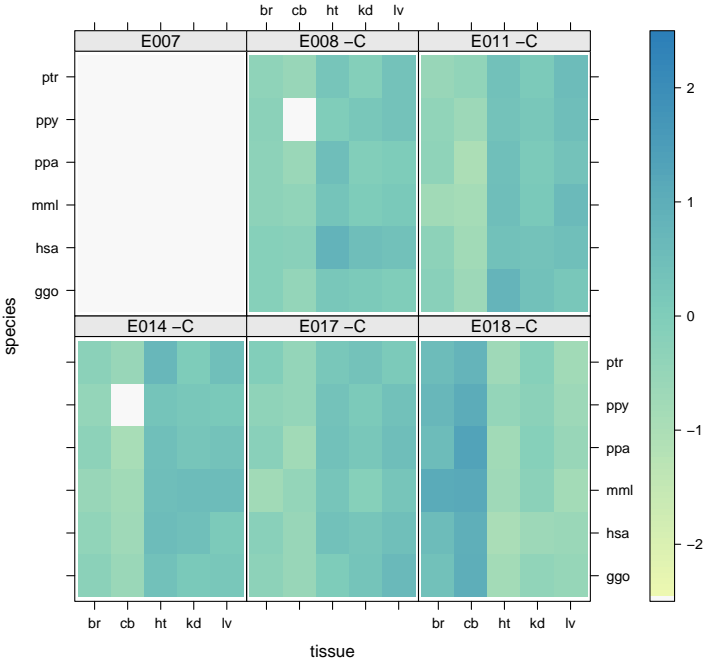

ENSG0000133612

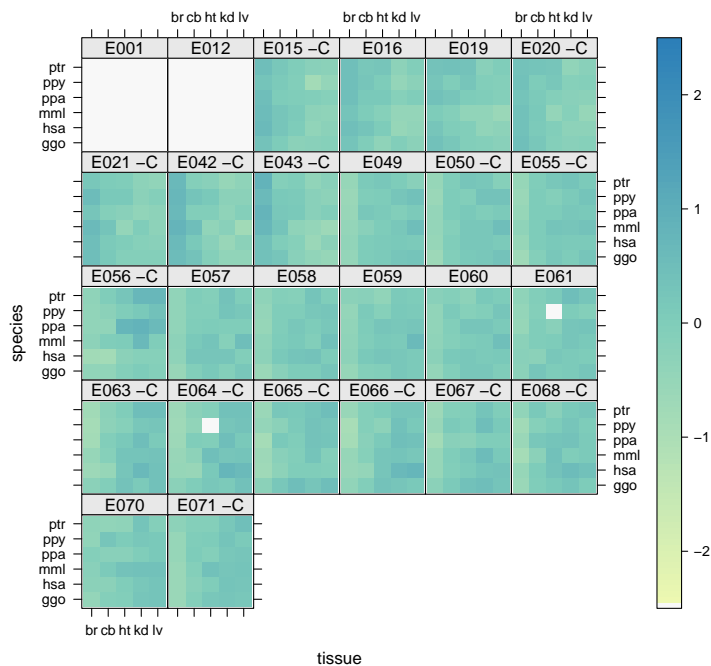

ENSG0000133816

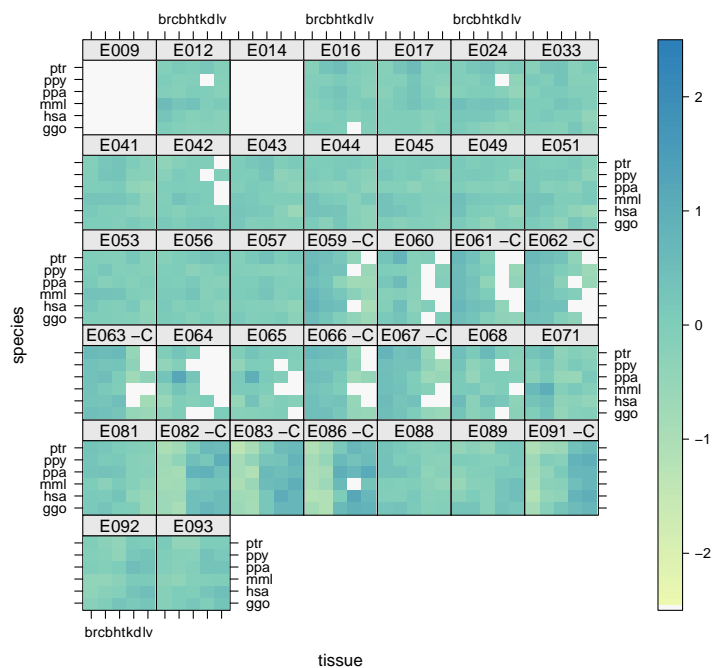

ENSG00000134278

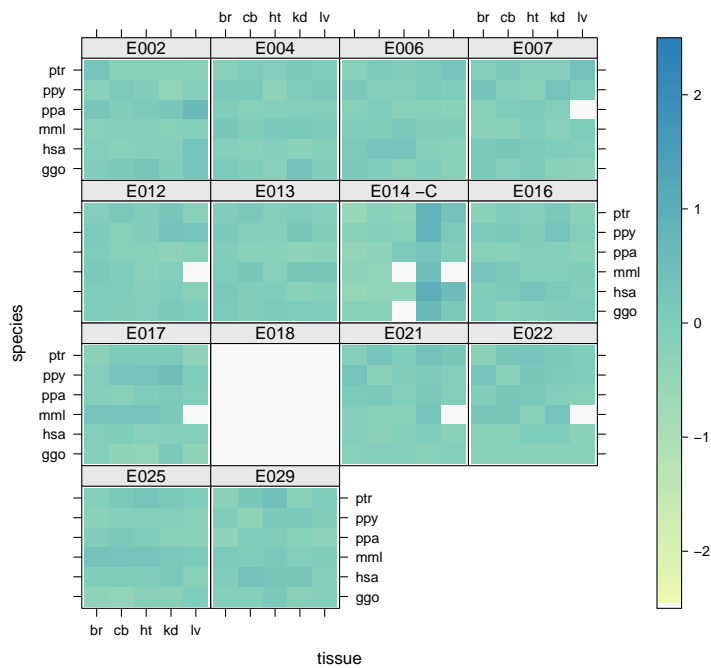

**ENSG00000134291**

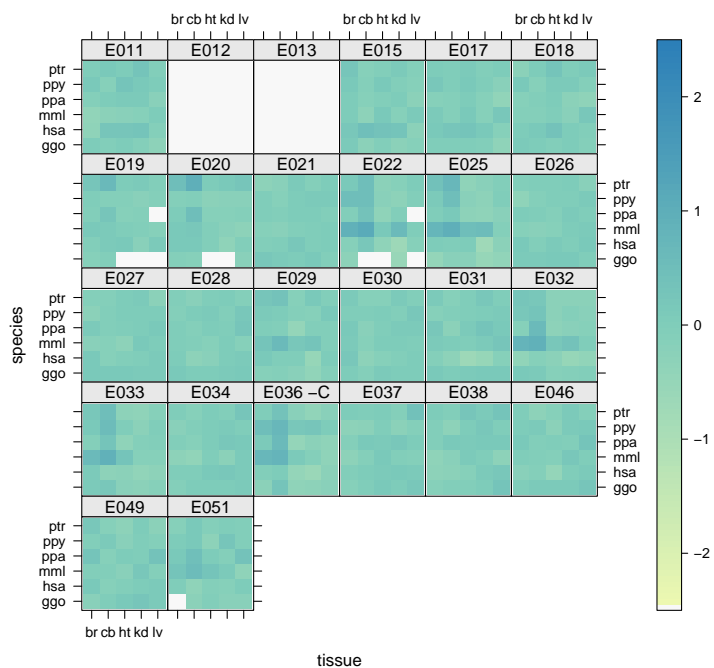

ENSG00000134294

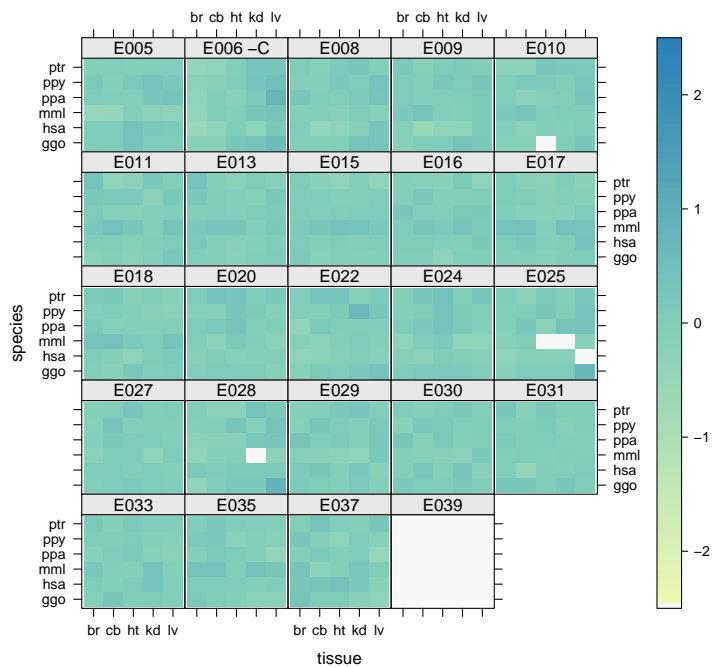

ENSG0000134313

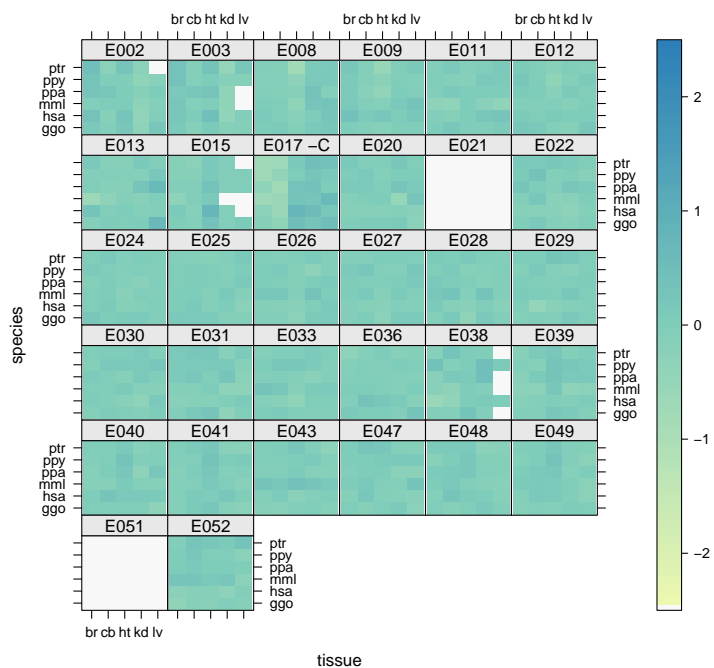

ENSG00000134686

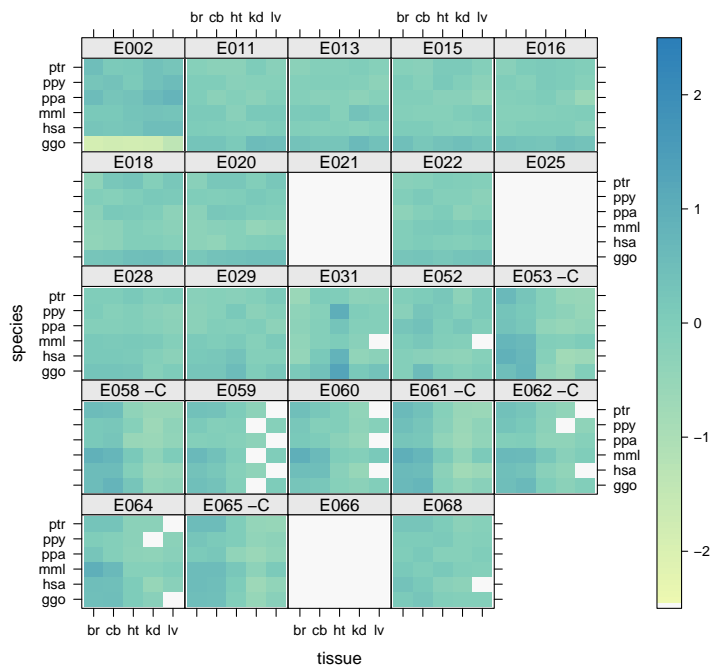





ENSG00000134873

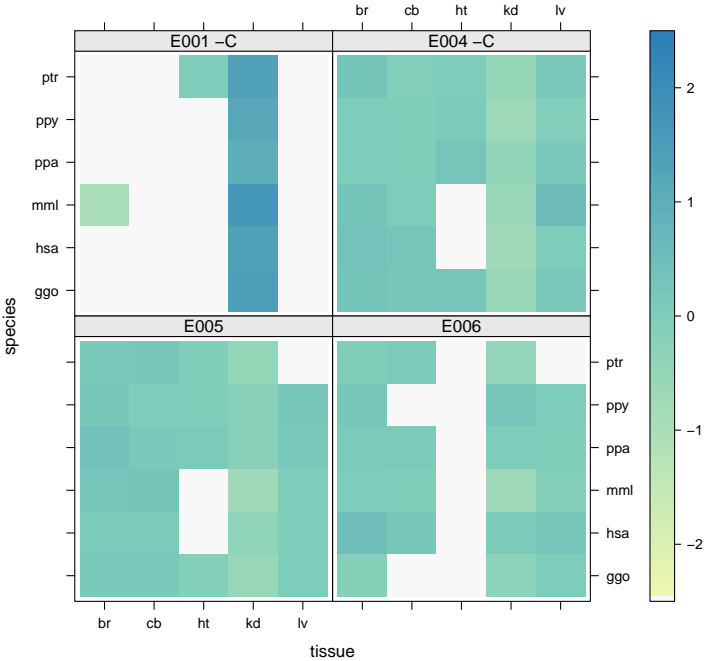



ENSG0000135365

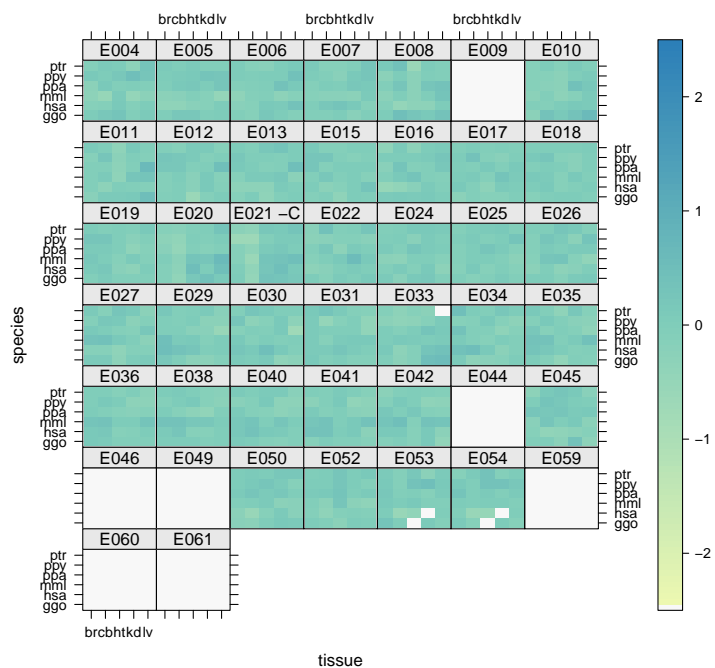

**ENSG00000135404**

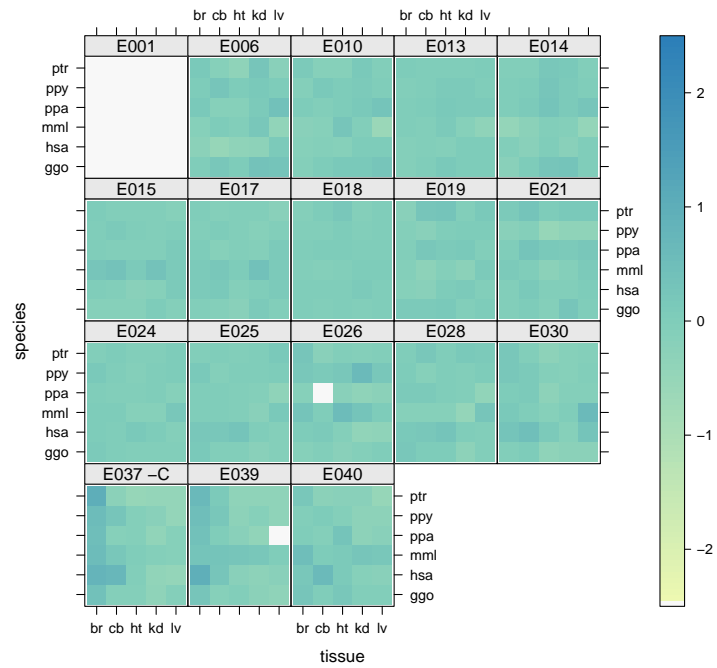











ENSG00000135930

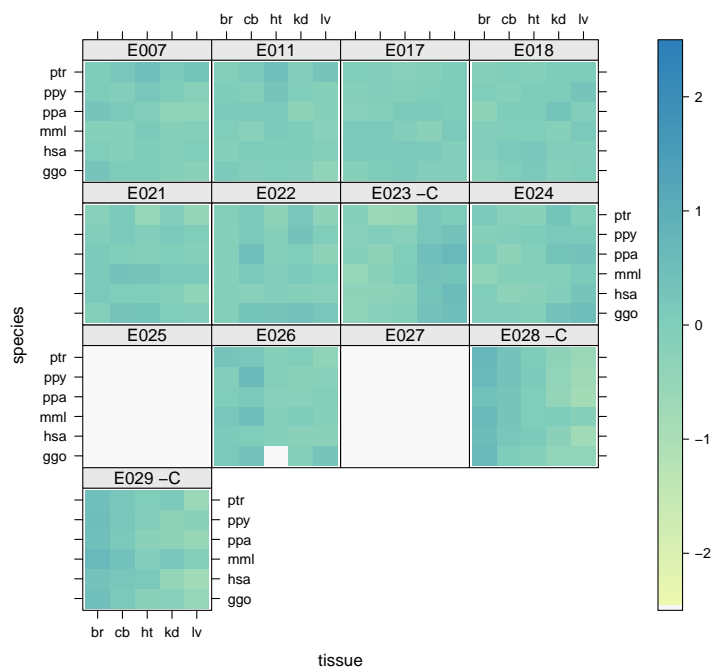





ENSG0000136237

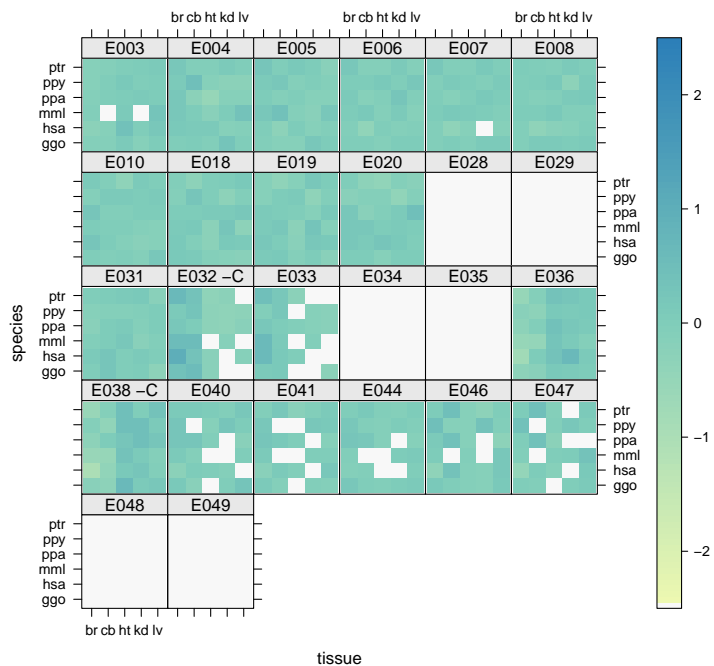



ENSG00000136436

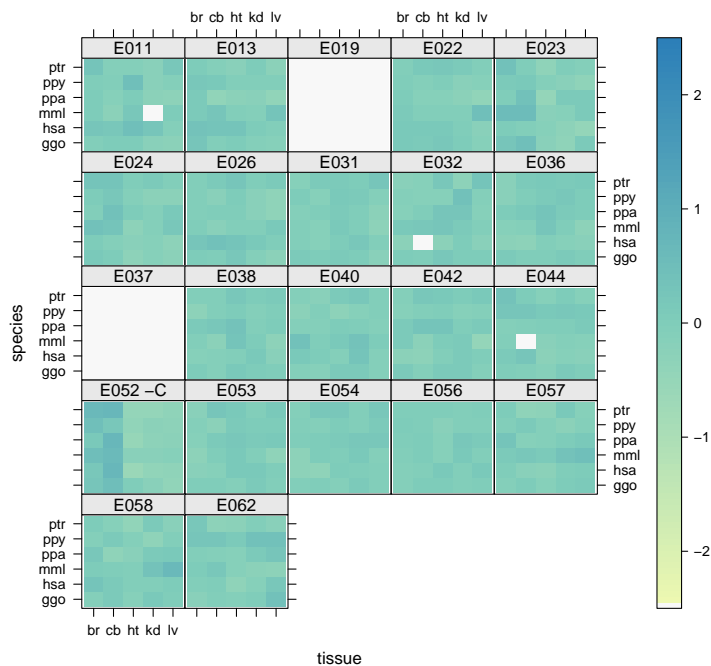













ENSG00000137094

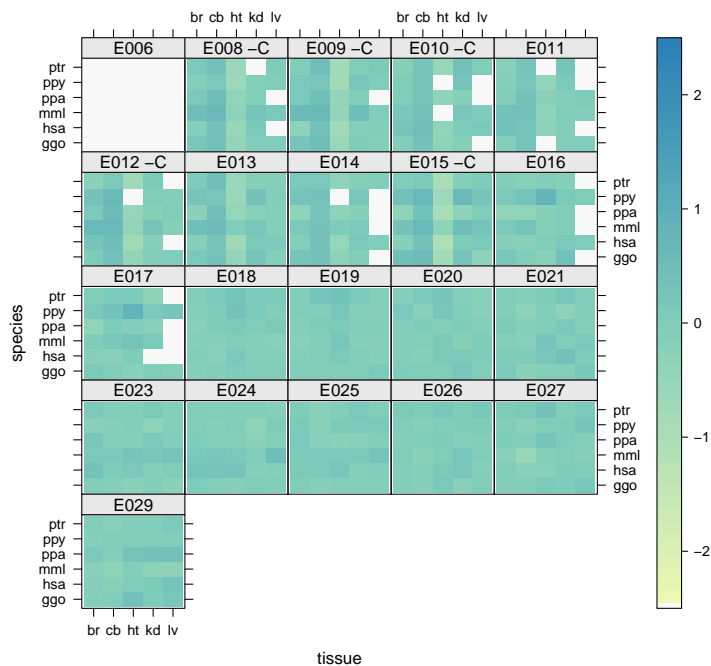

ENSG00000137100

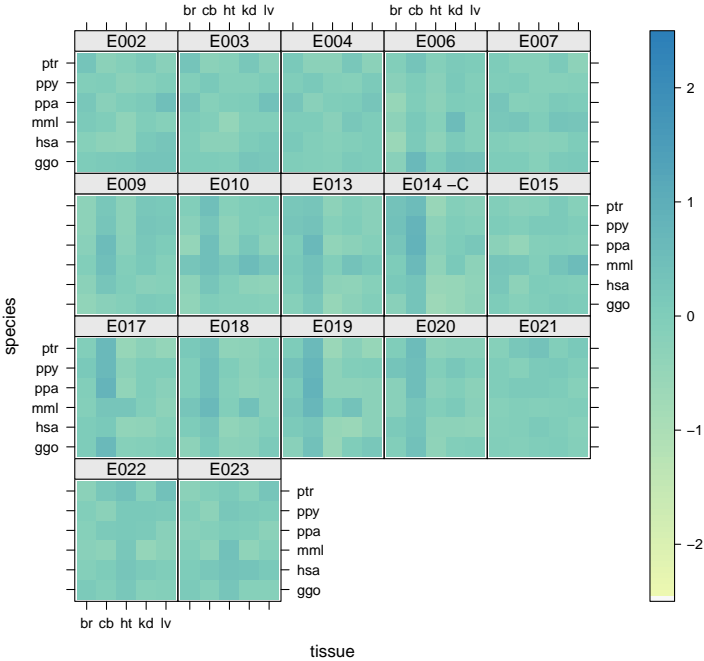

ENSG00000137166

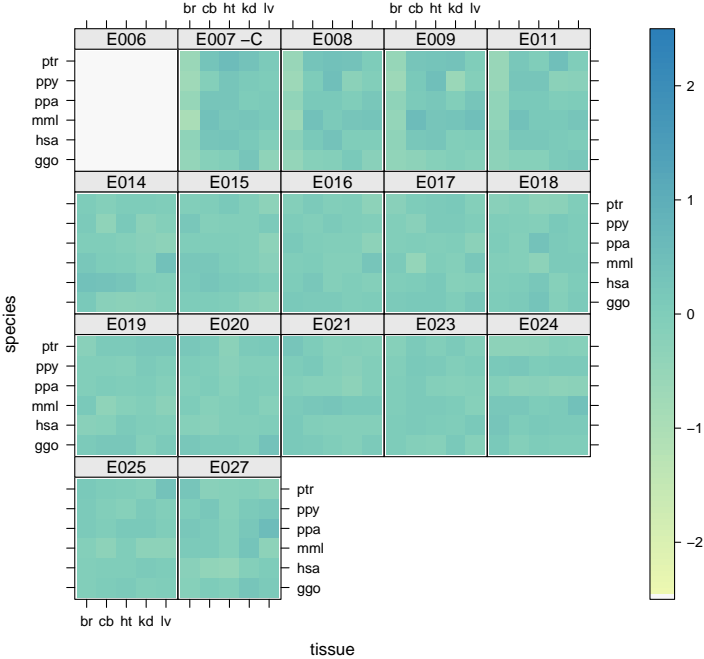







ENSG0000137501

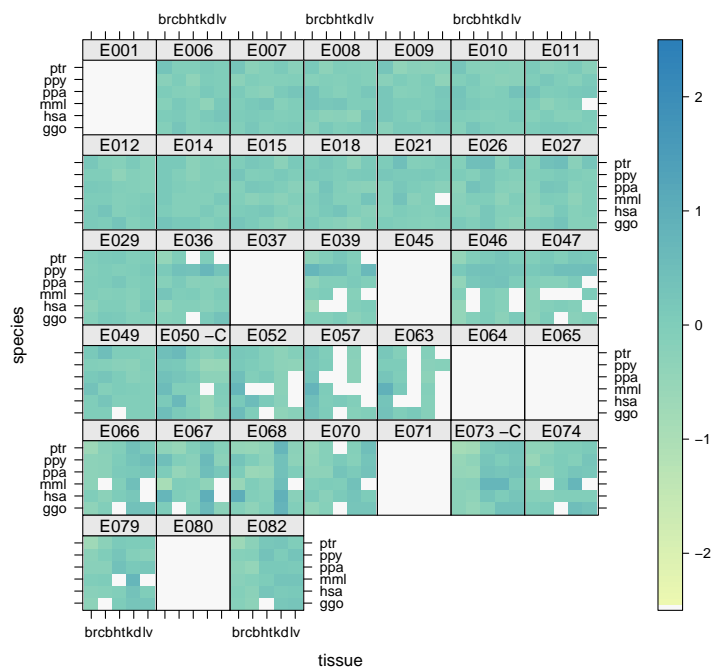



ENSG00000137710

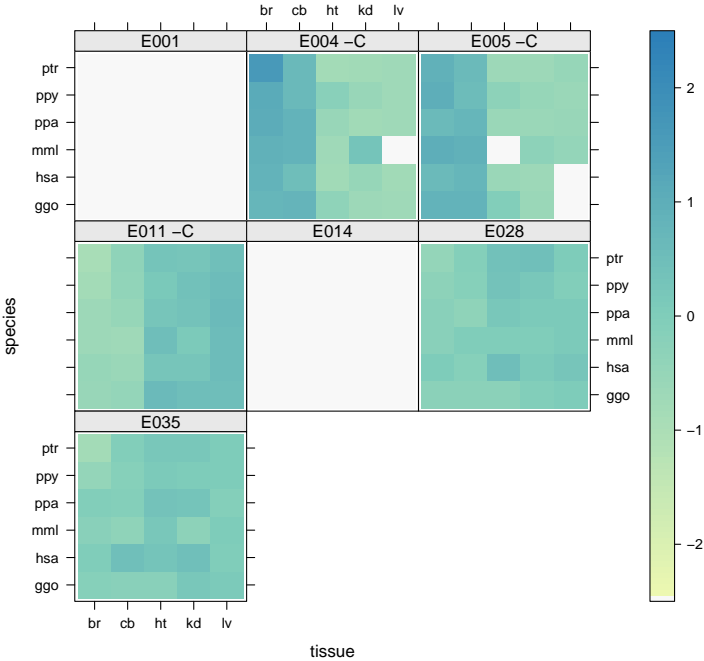

ENSG00000137942

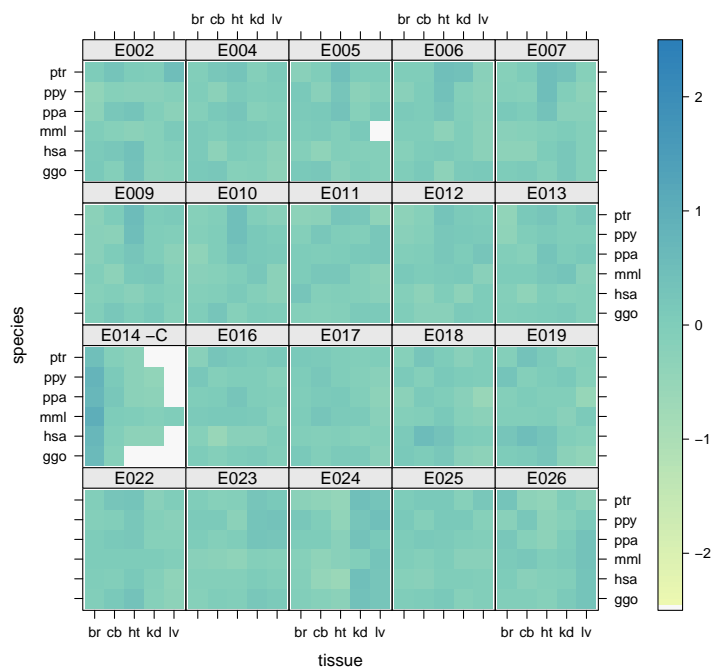

ENSG00000138030

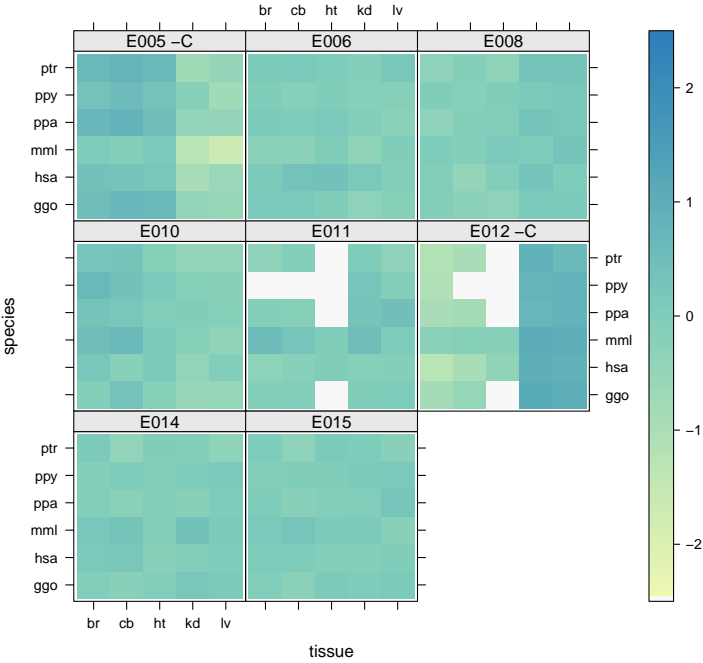

ENSG00000138075

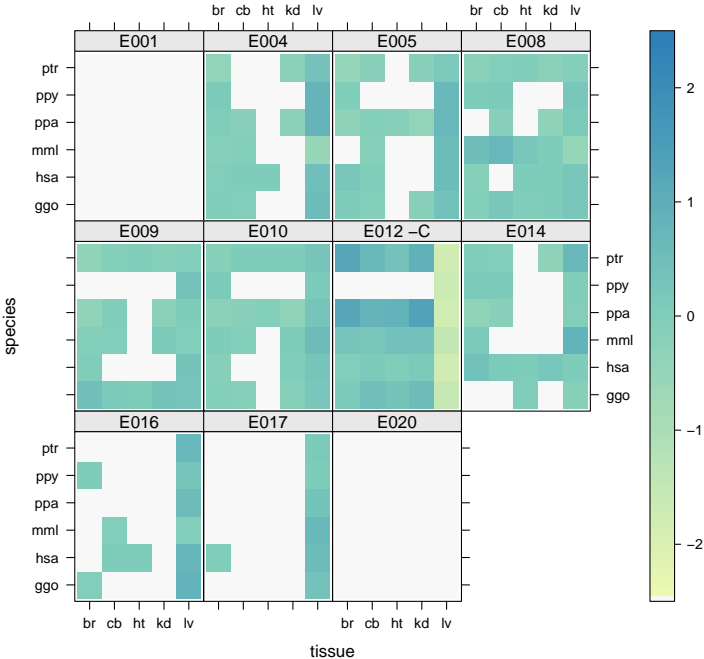

ENSG0000138101

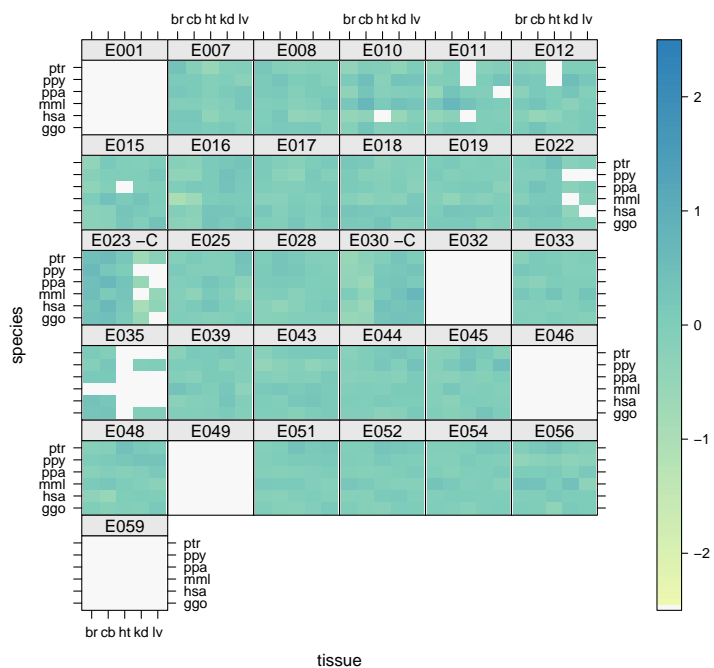





ENSG00000138207

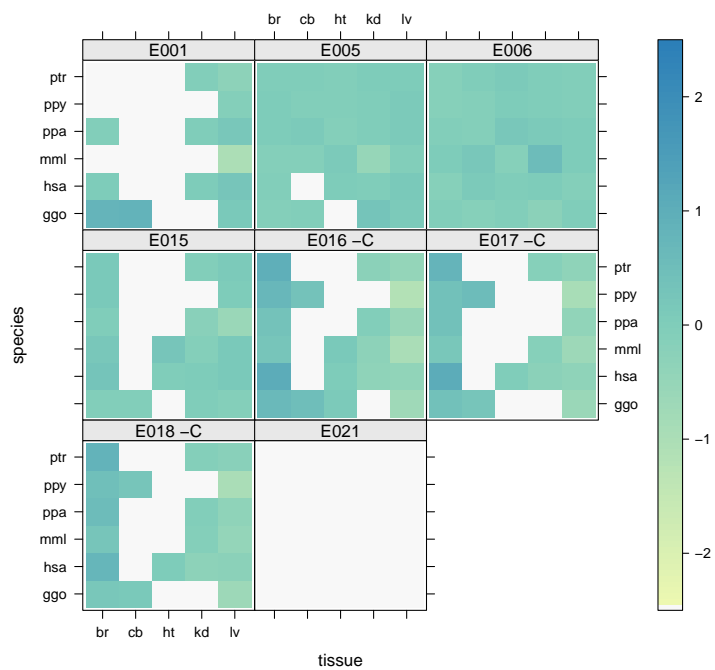

ENSG0000138246

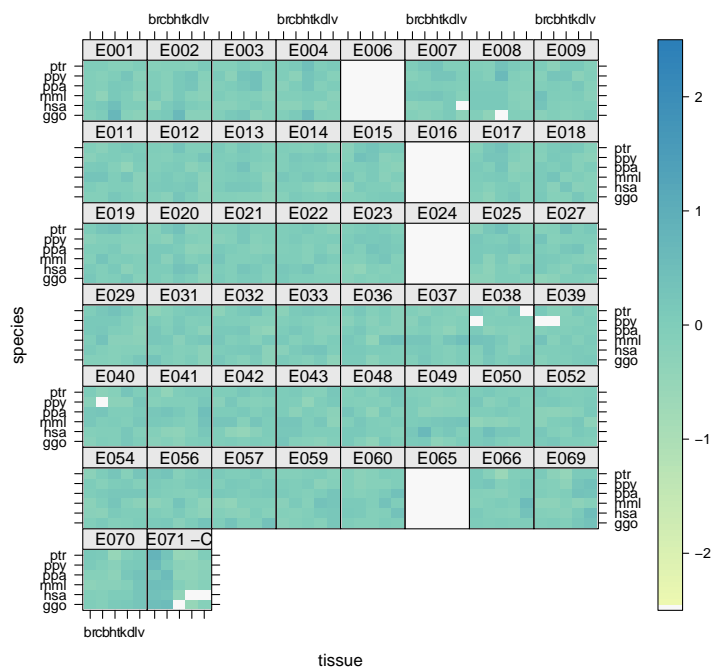







ENSG00000138434

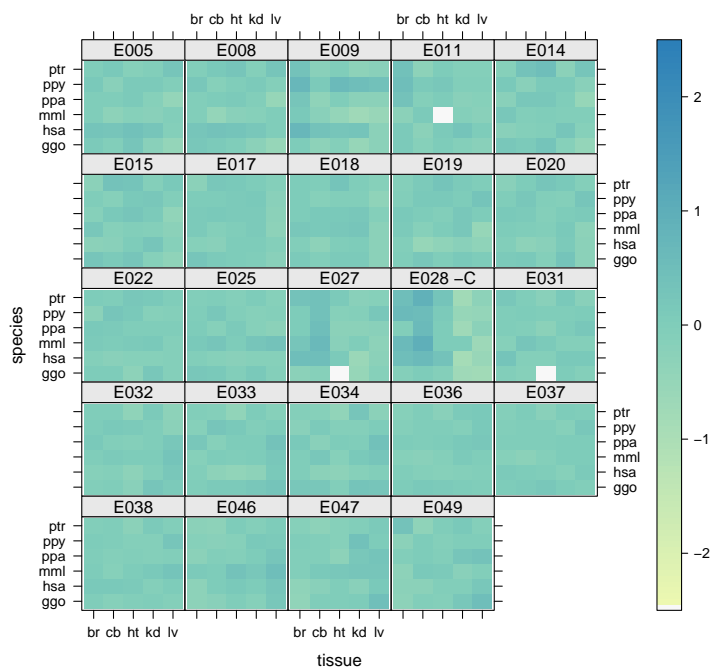

ENSG00000138443

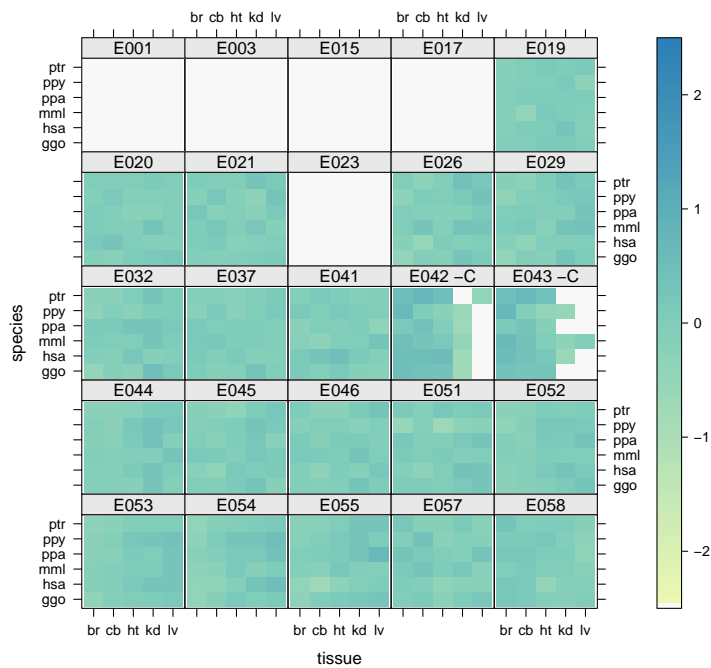



ENSG00000138606

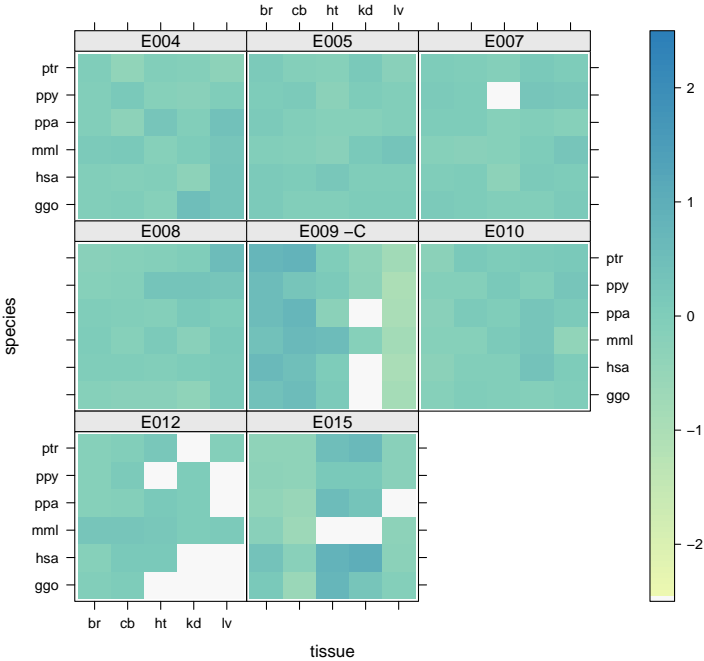

ENSG00000138639

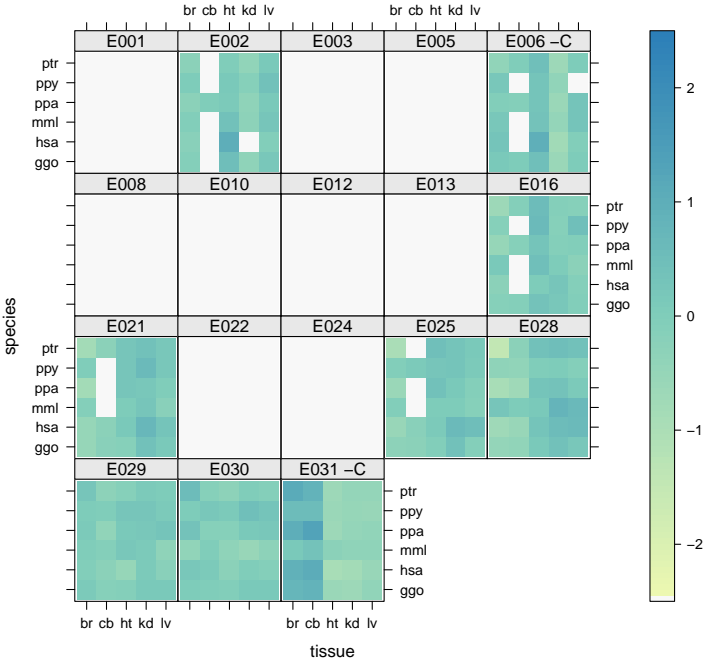

ENSG0000138640

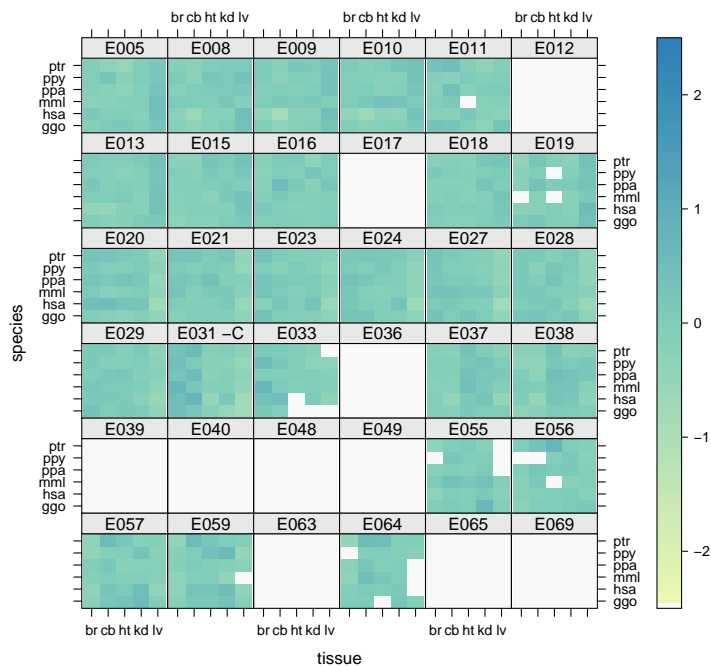

ENSG00000138650

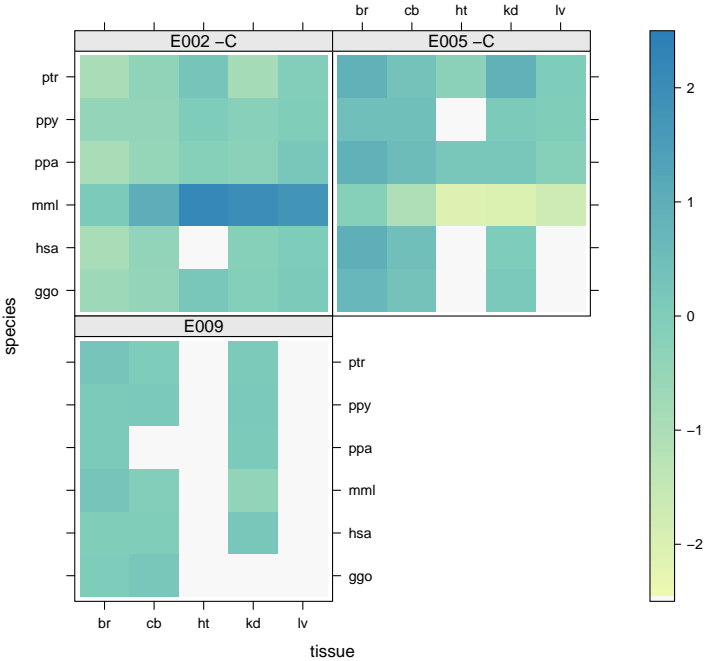

ENSG00000138750

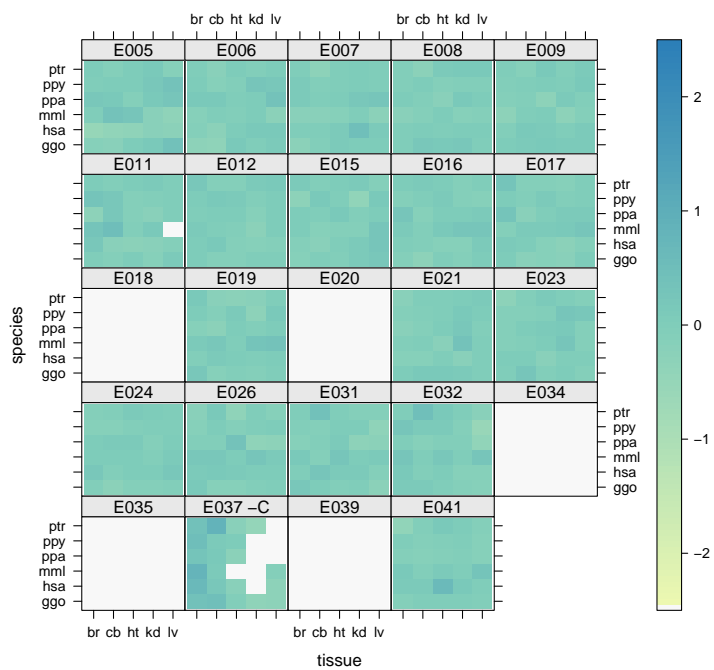









ENSG00000138814

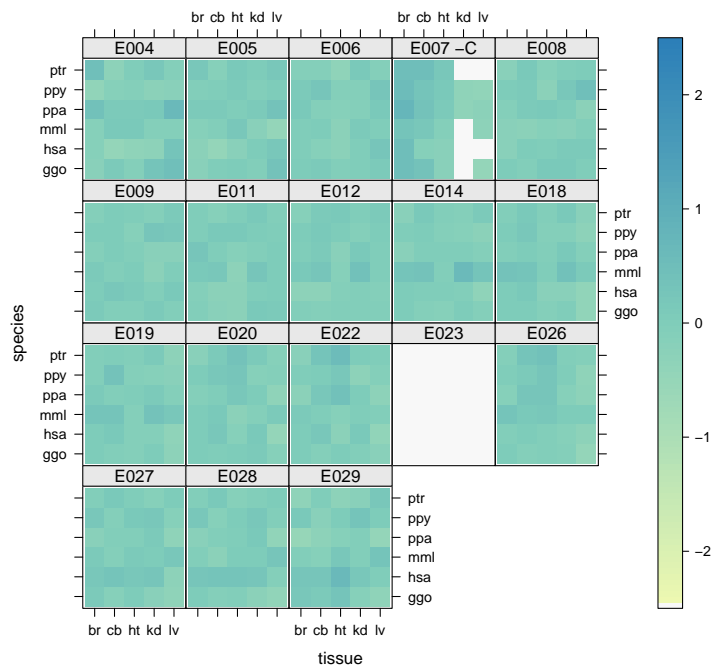

ENSG00000139182

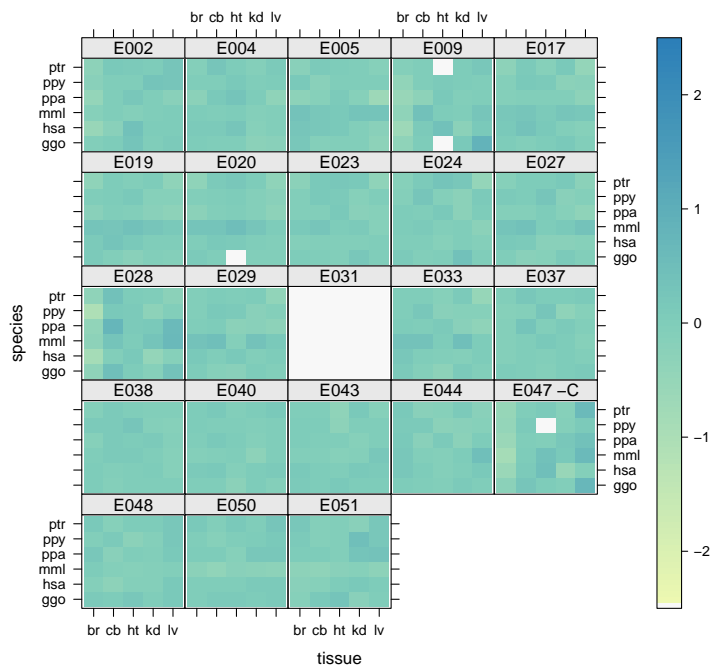



ENSG00000139194

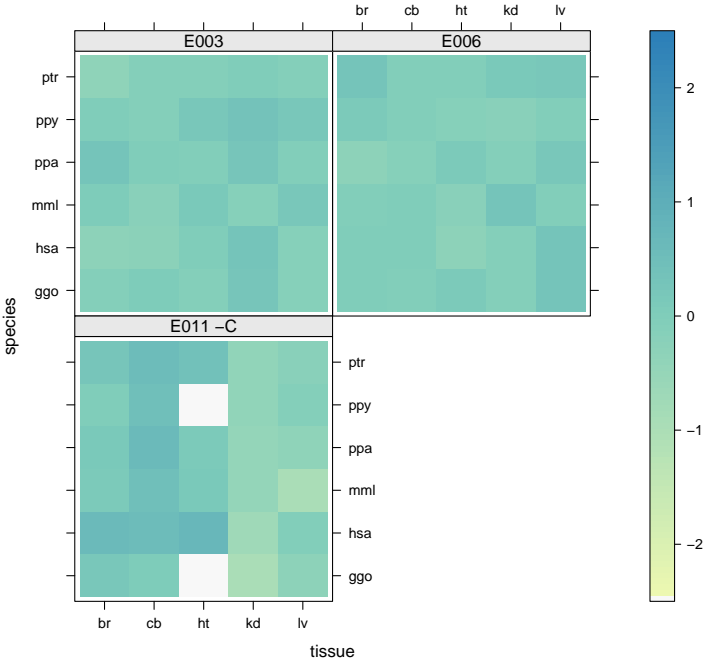

ENSG0000139613

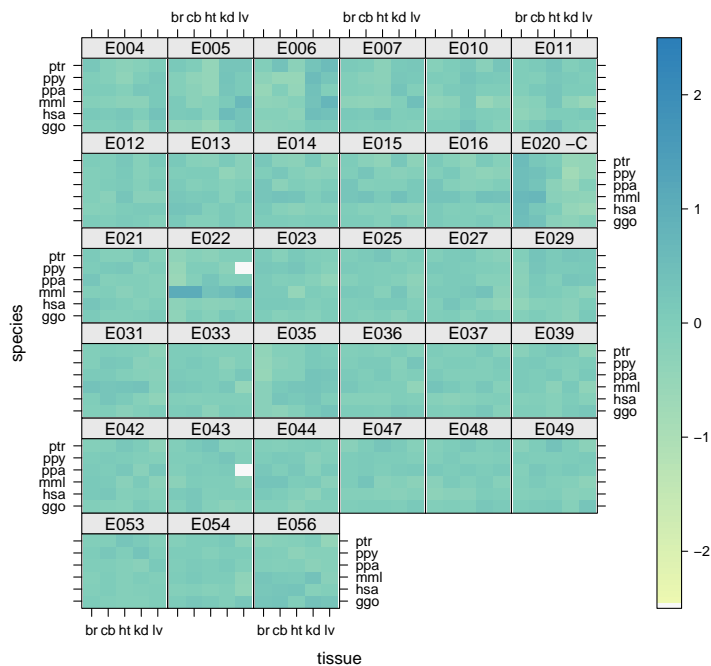









ENSG00000139970

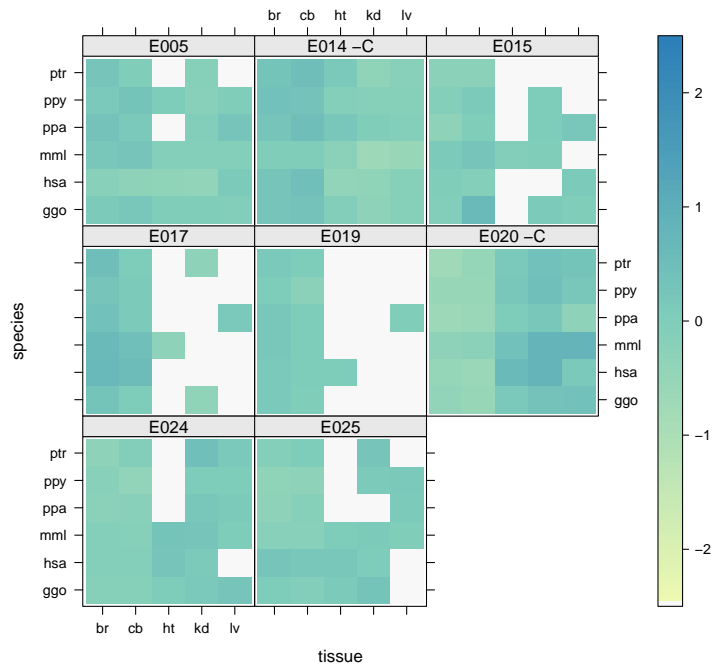



ENSG00000140199

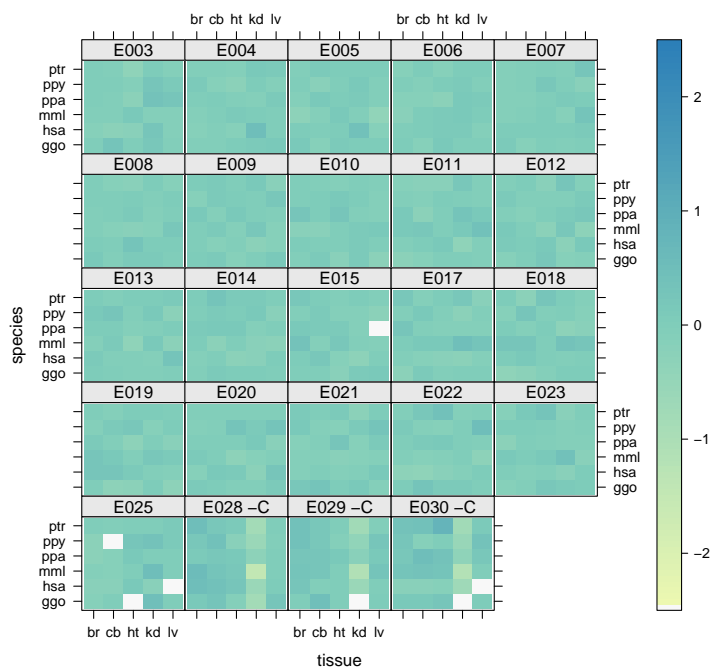



ENSG00000140416

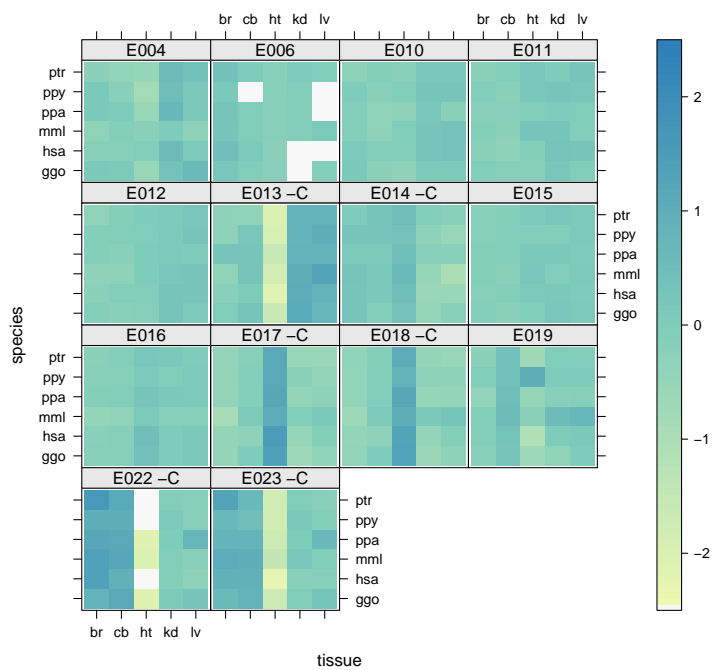



ENSG00000141068

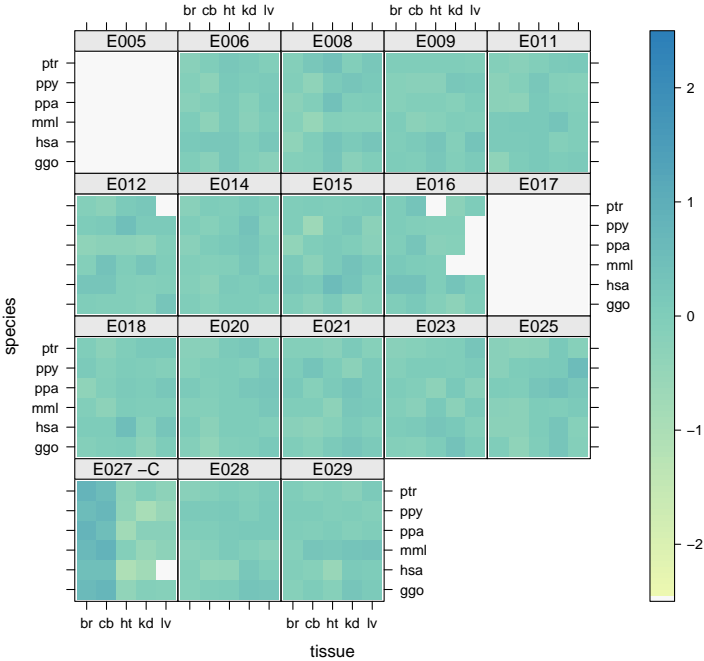

ENSG00000141232

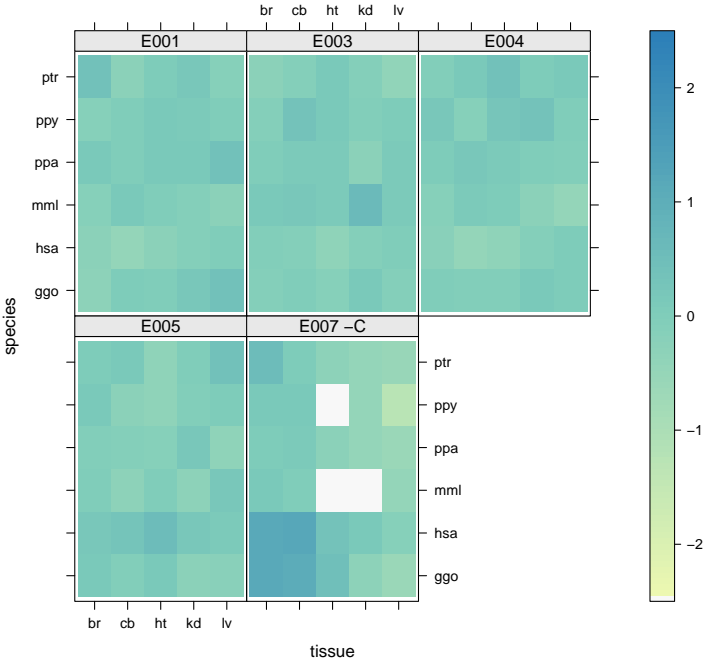







ENSG00000141627

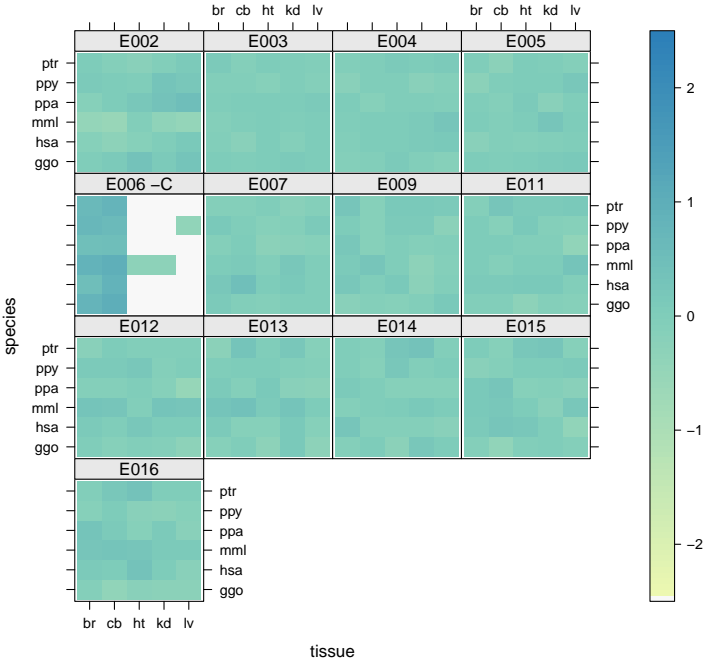



ENSG00000142453

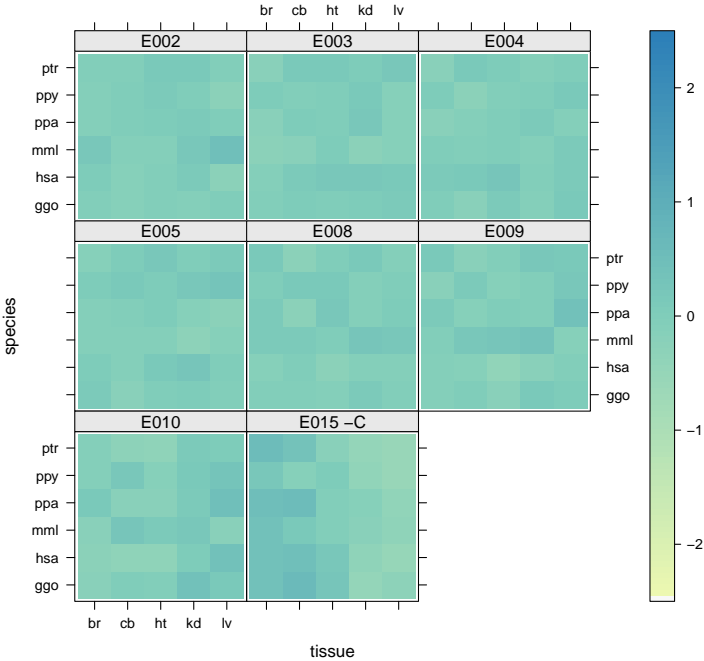

ENSG00000142875

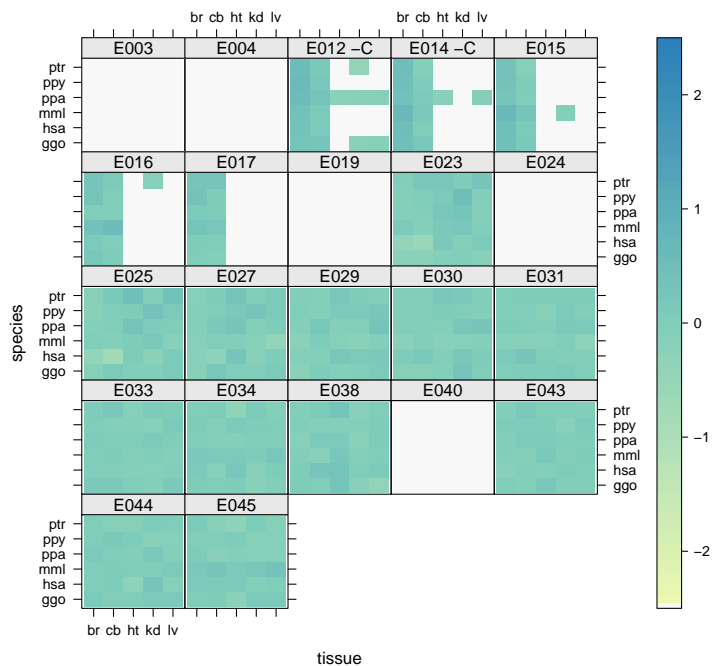



ENSG00000143164

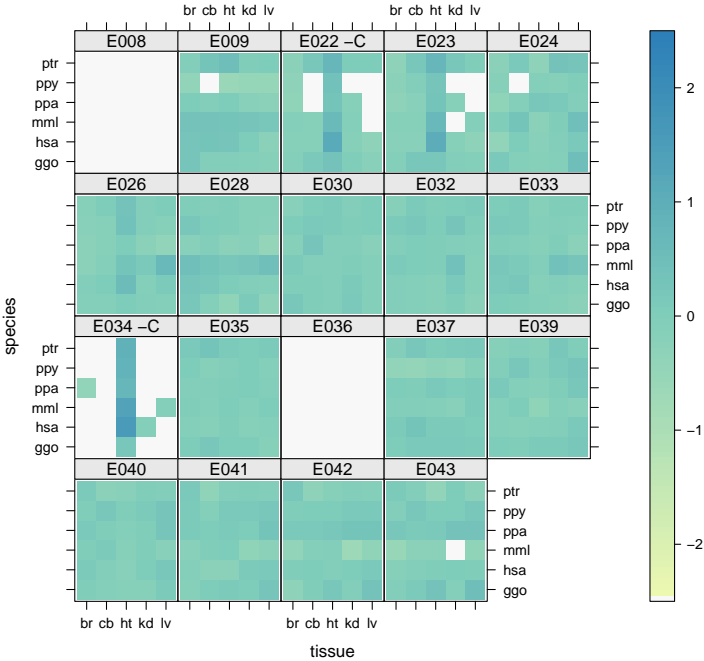



ENSG00000143499

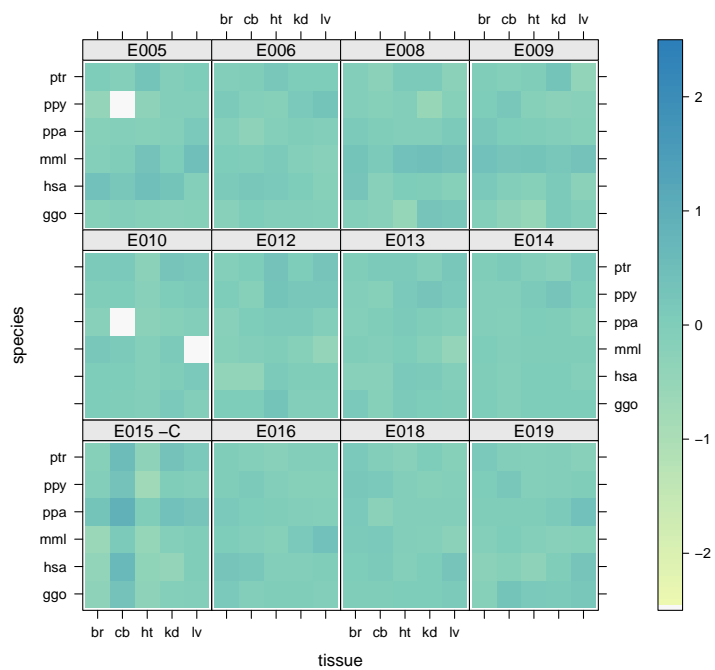



ENSG00000143549

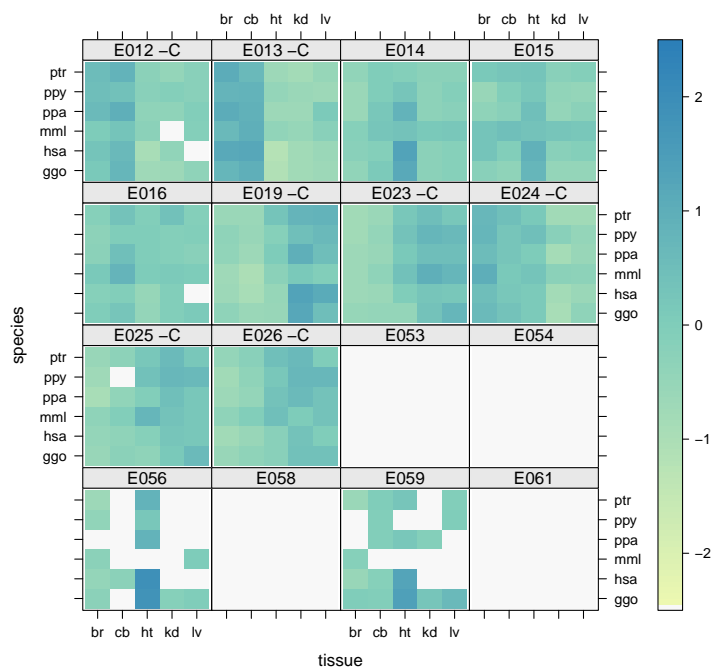

ENSG00000143554

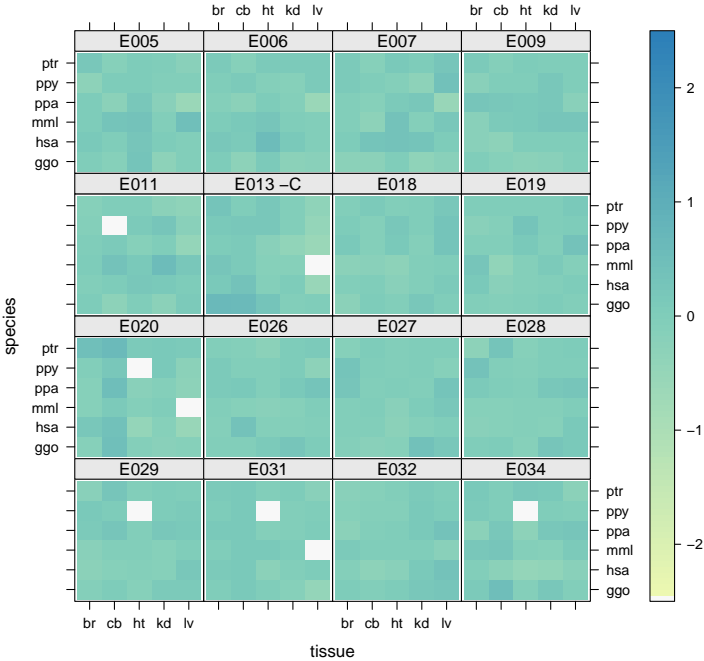

ENSG00000143771

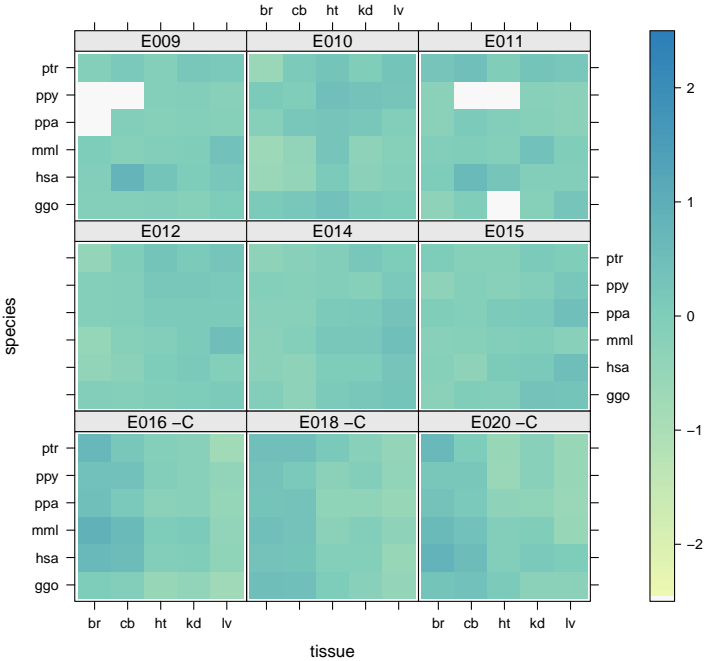

ENSG00000143786

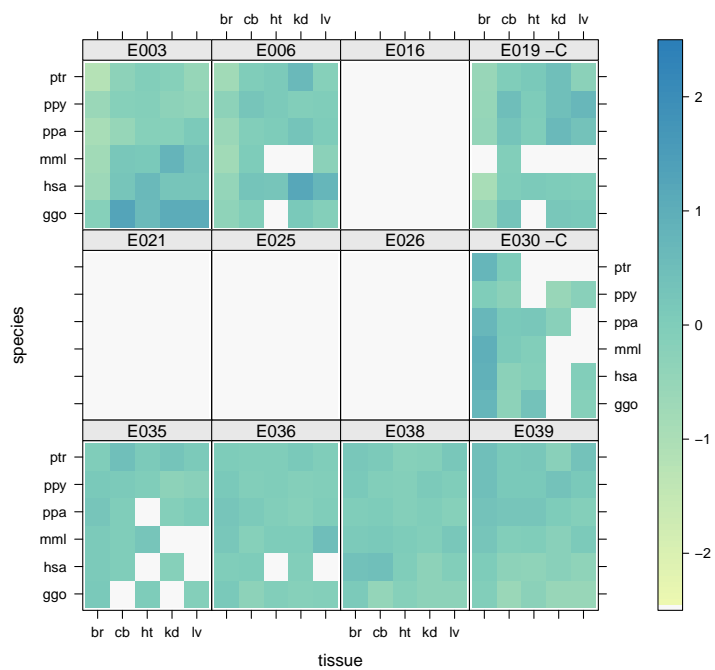



ENSG00000144283

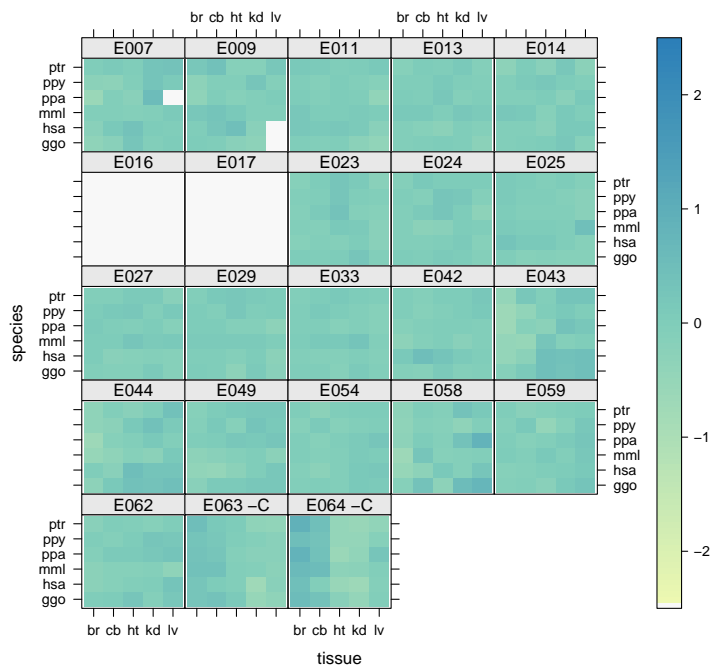









ENSG00000145194

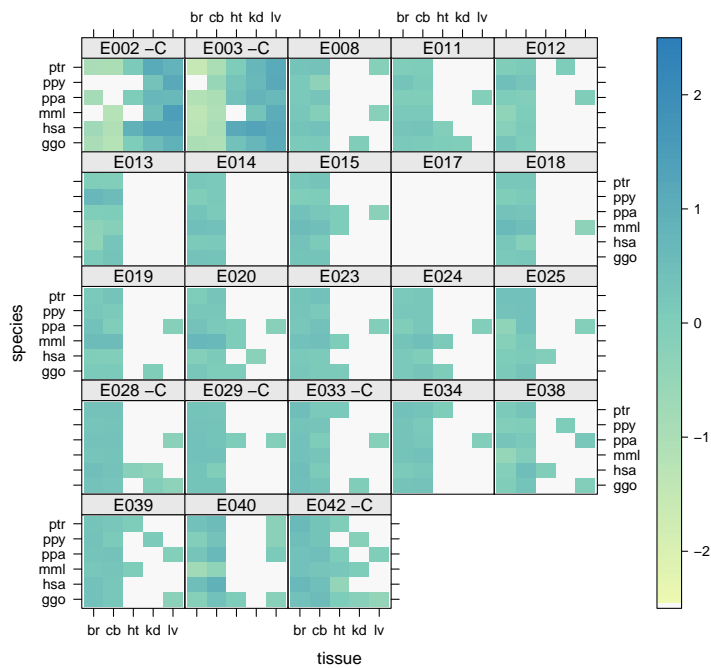

ENSG00000145349

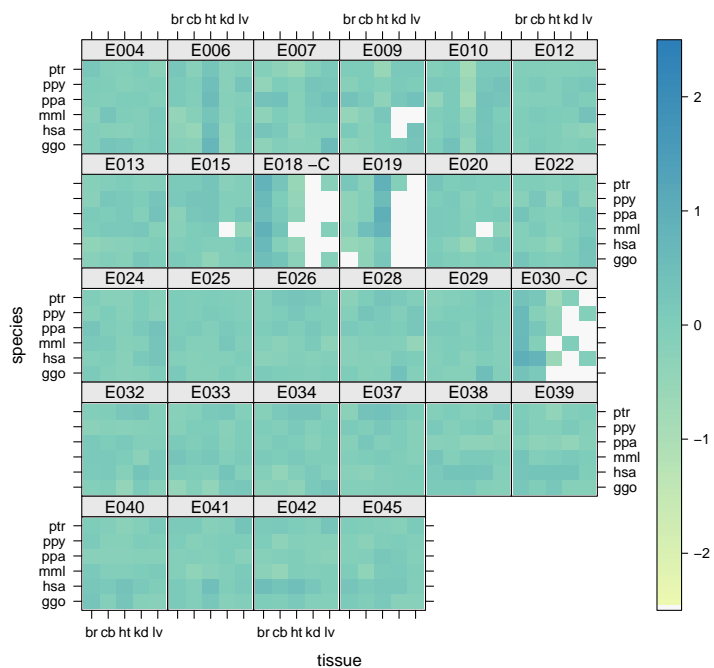

ENSG0000145362

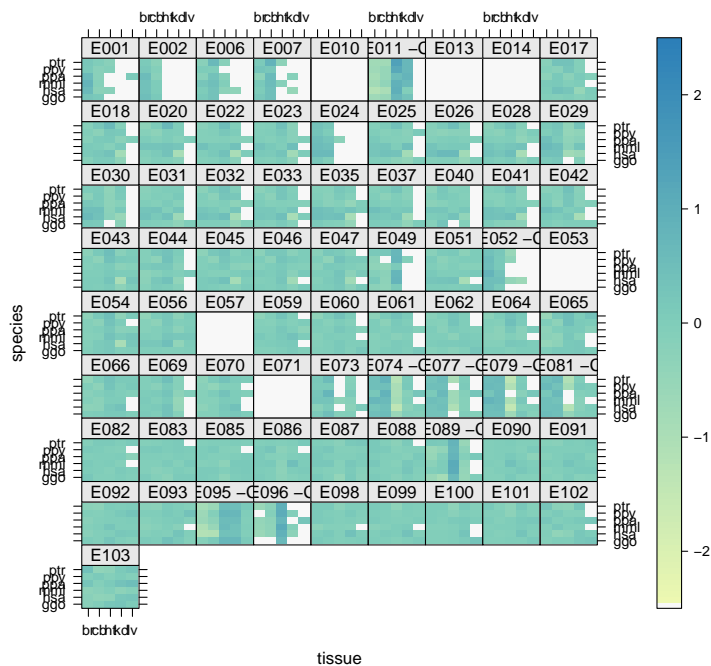

ENSG00000145526

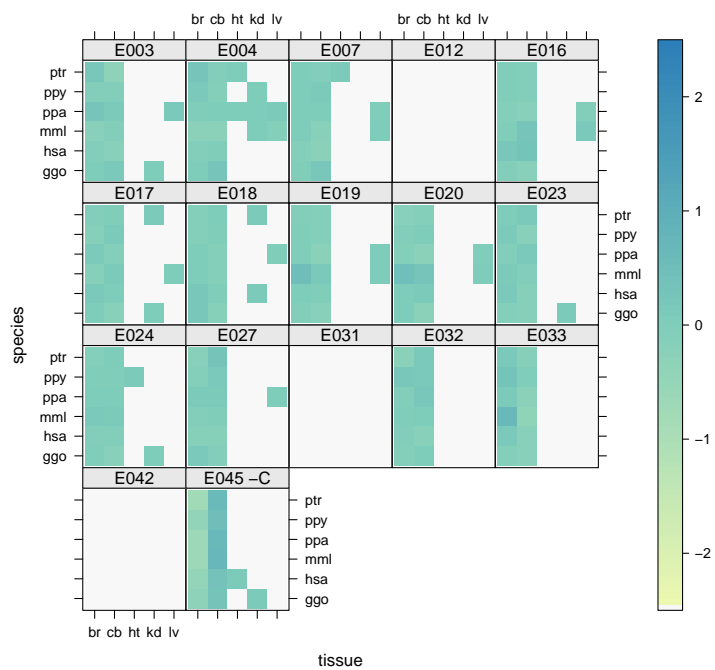





ENSG00000145675

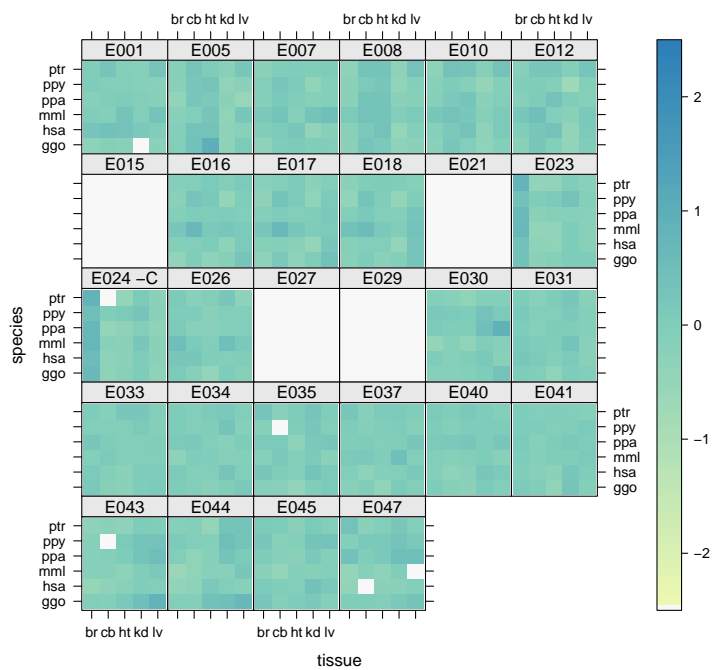

ENSG00000145730

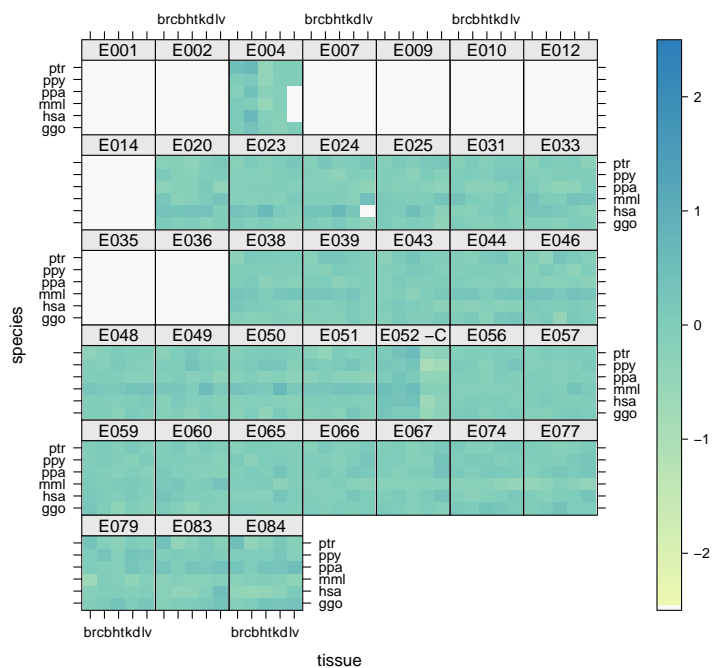

ENSG00000146216

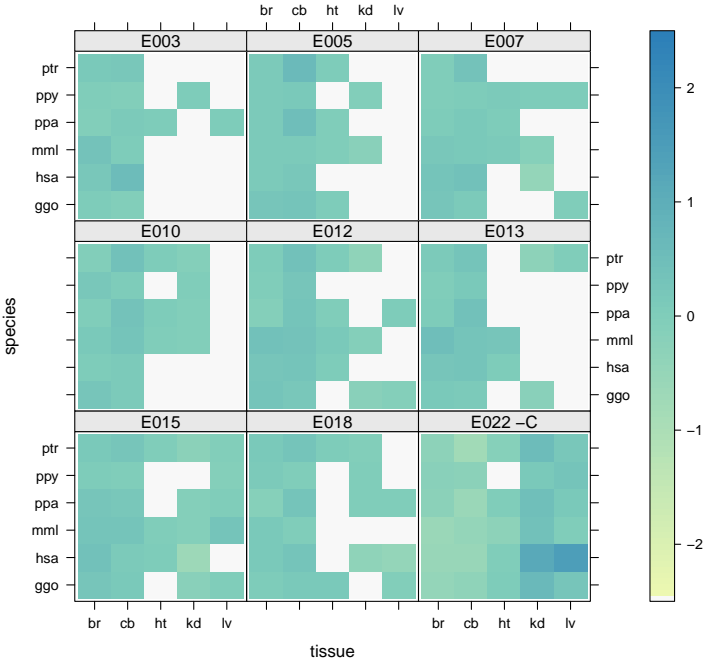

ENSG00000147852

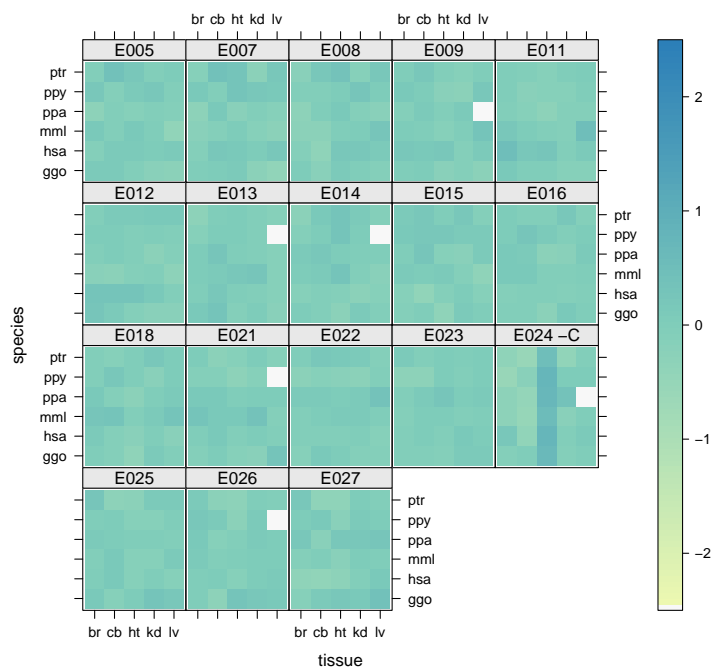

ENSG00000148053

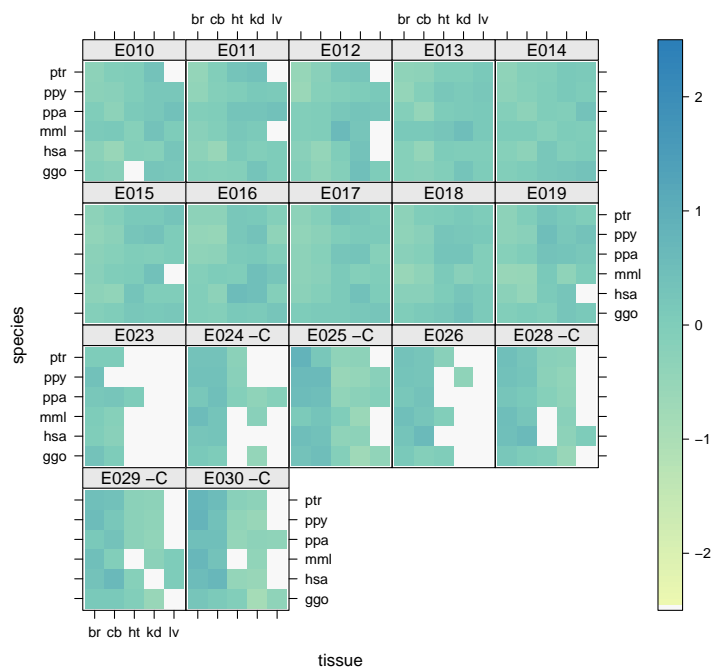

ENSG00000148218

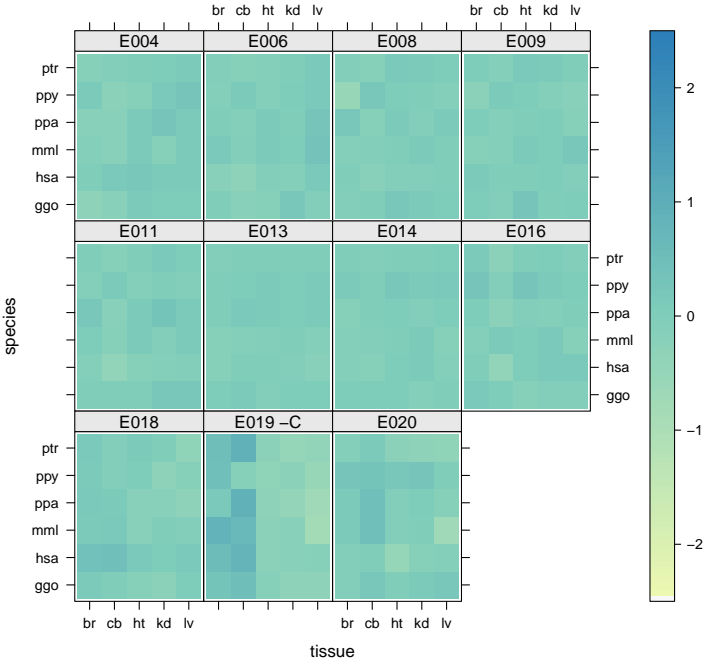

ENSG00000148297

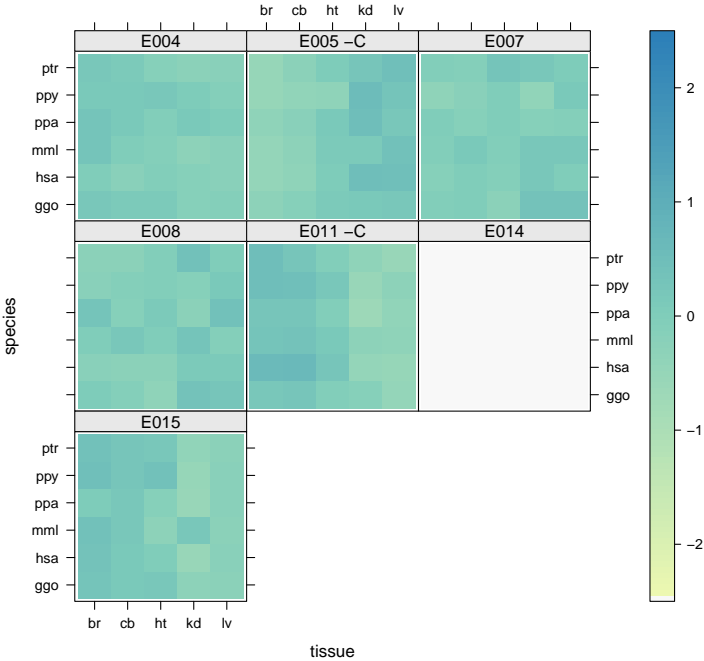

ENSG00000148339

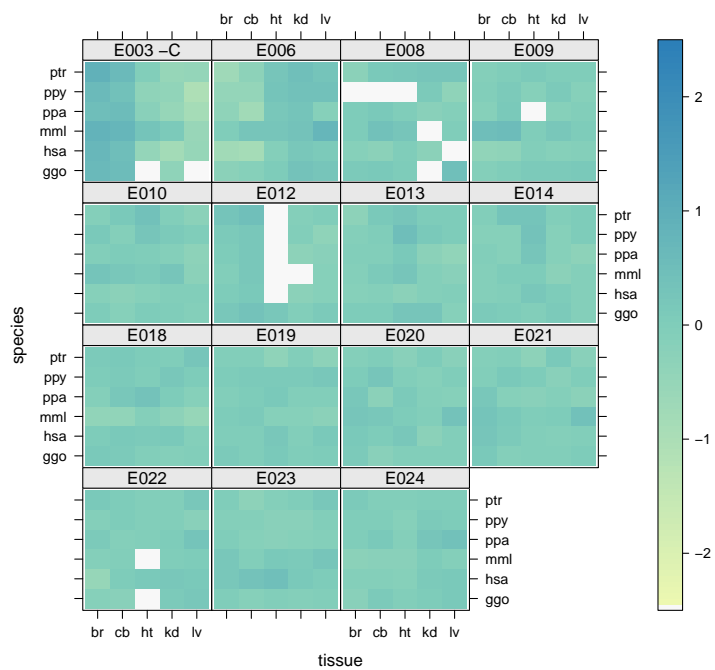







ENSG0000149294

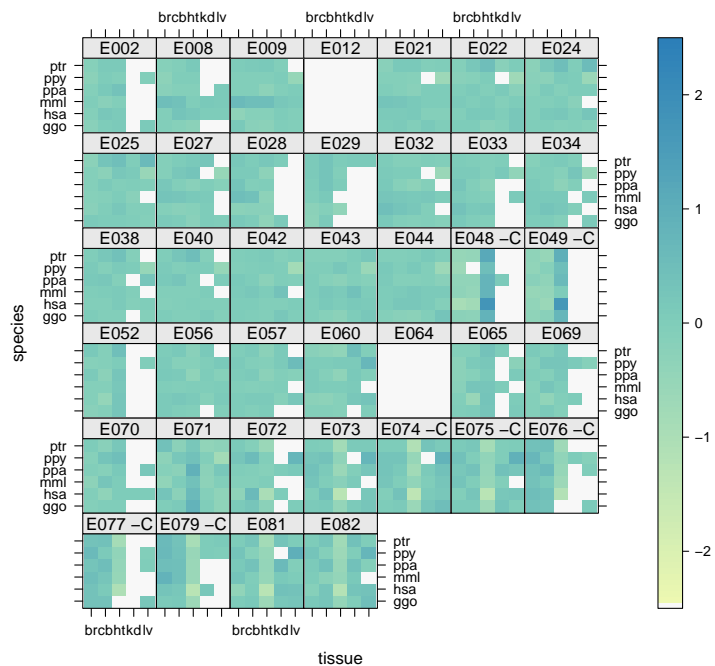



ENSG00000149930

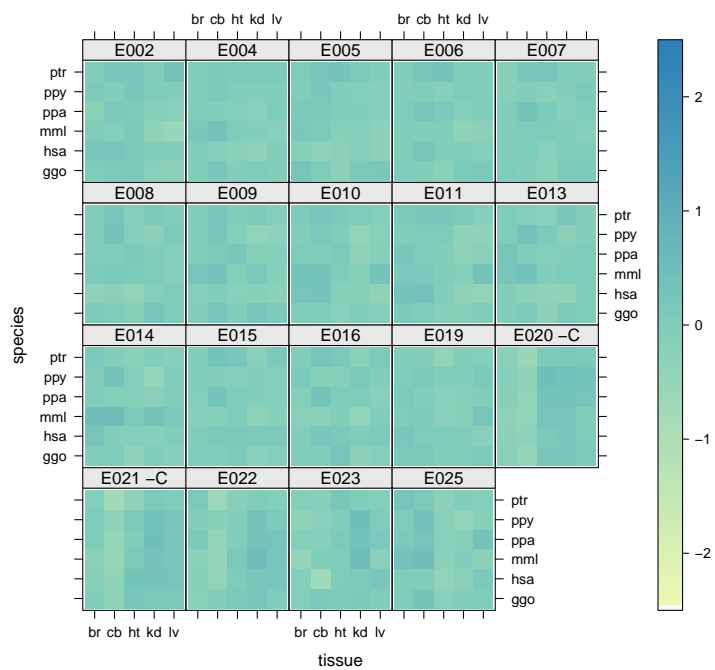

ENSG00000150656

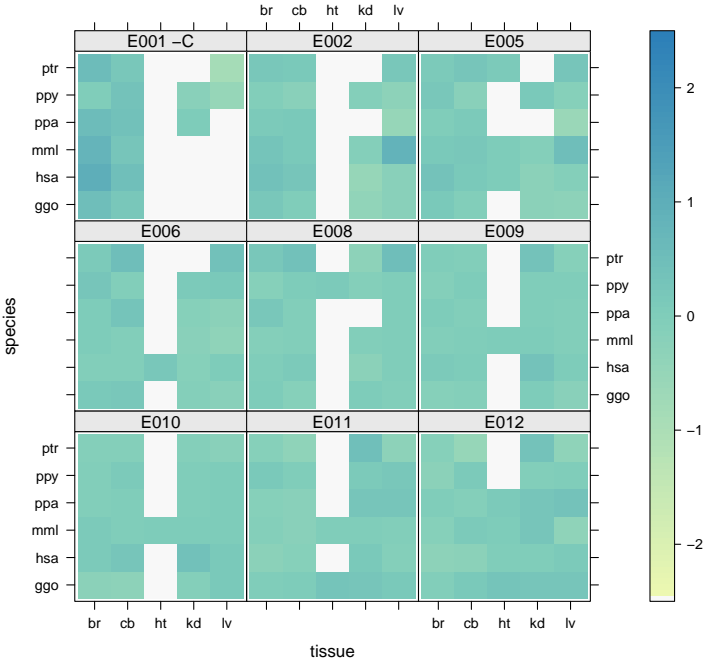



ENSG0000151150

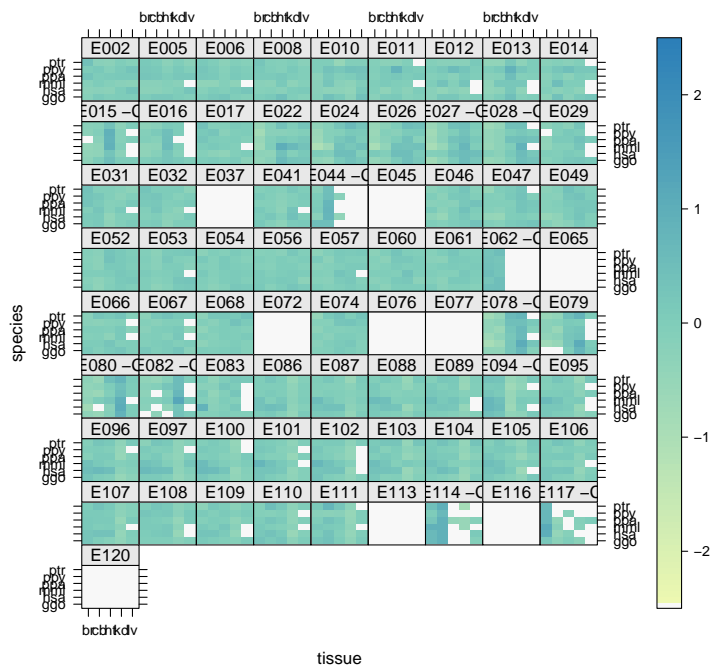





ENSG00000151320

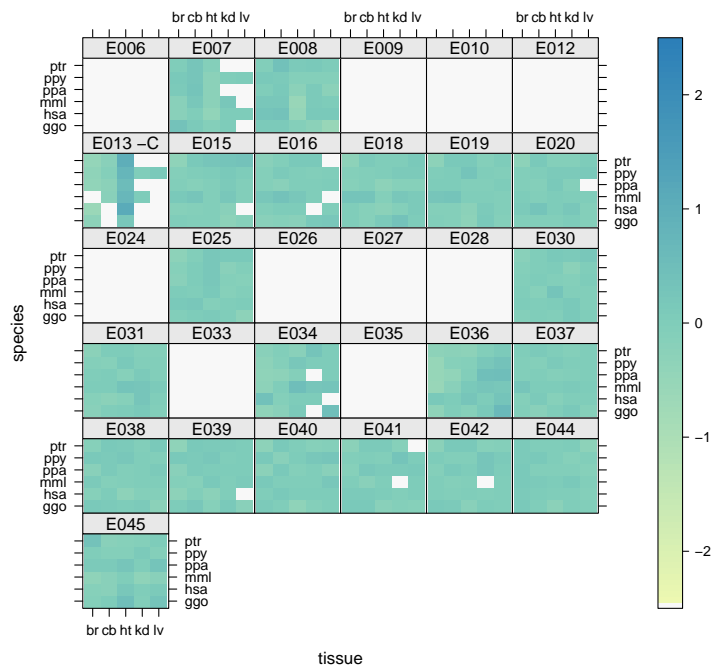





ENSG0000151914

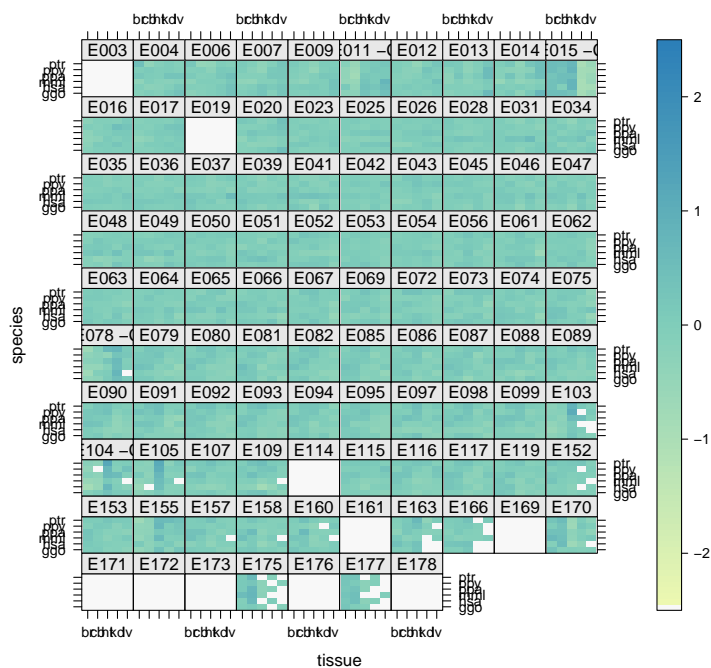

ENSG00000152492

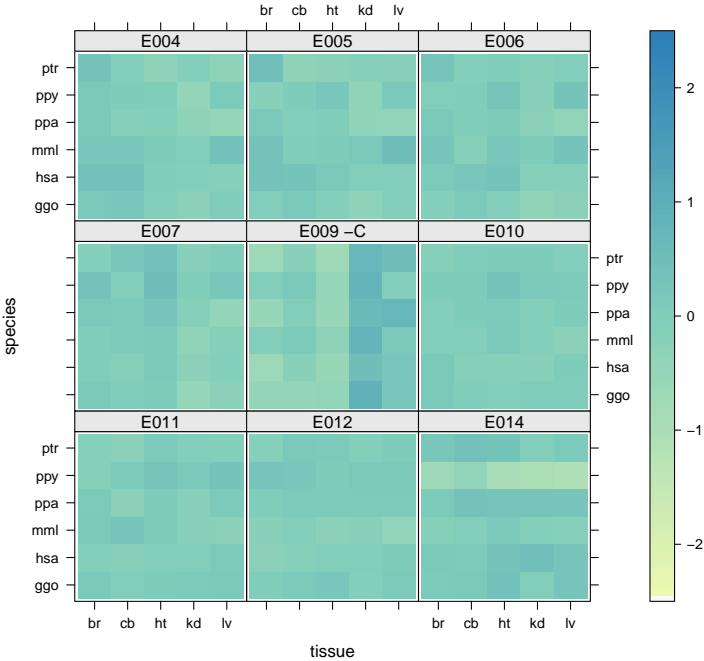

ENSG00000152556

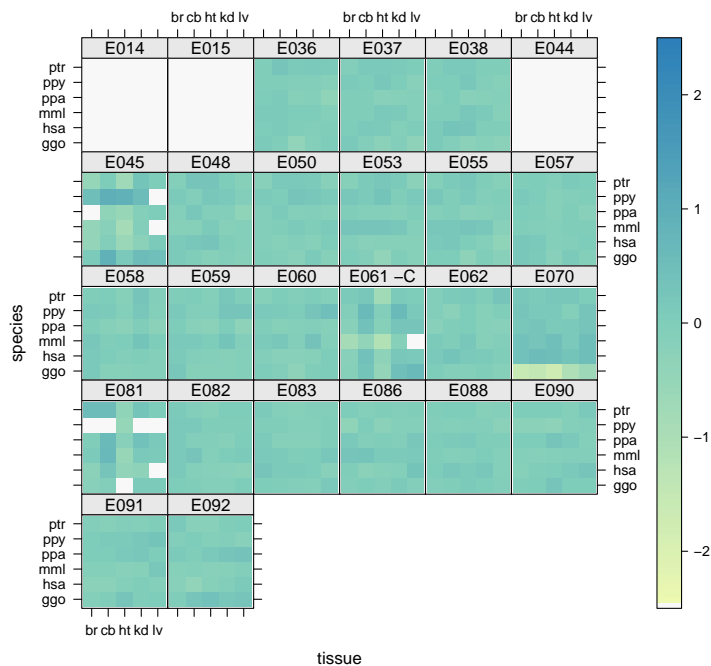





ENSG00000153822

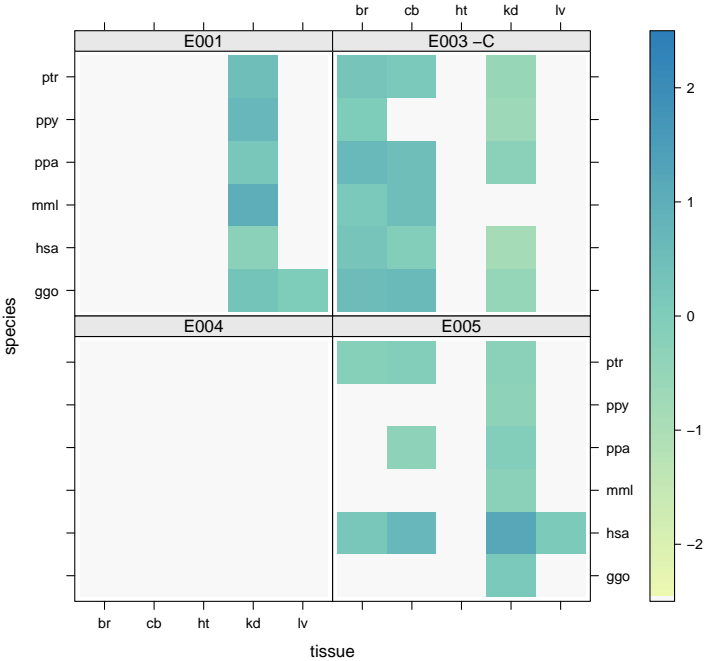





ENSG0000154310

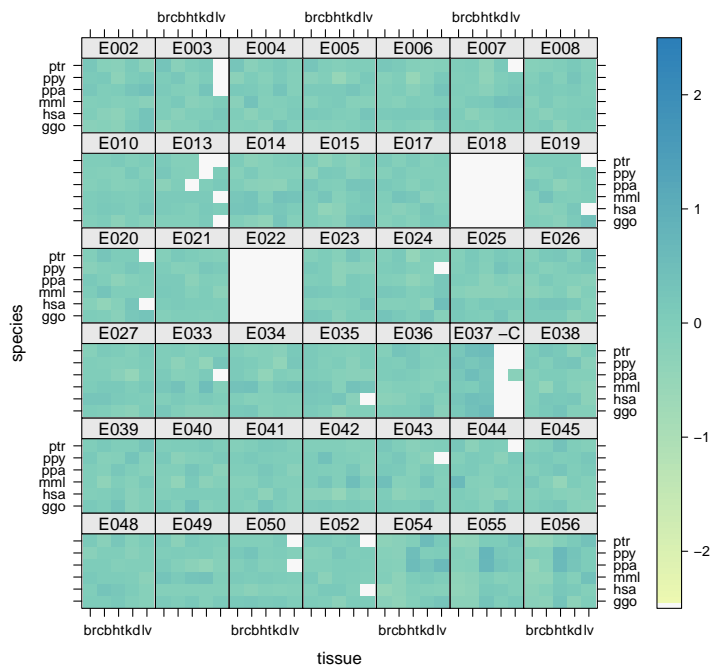



ENSG00000154723

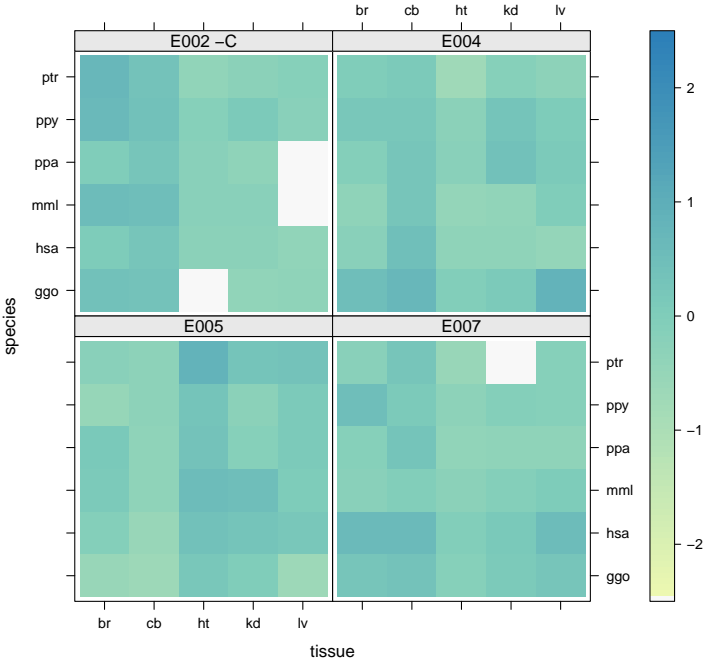



ENSG0000155363

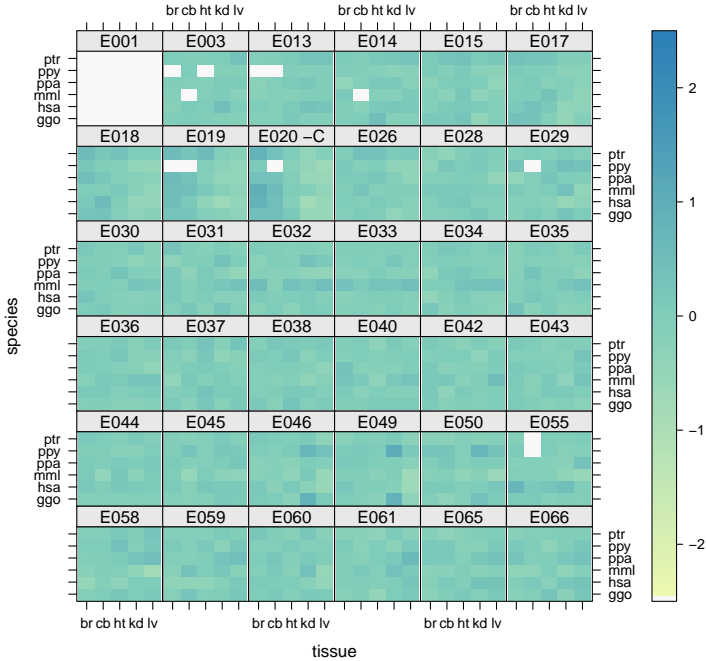



ENSG00000155511

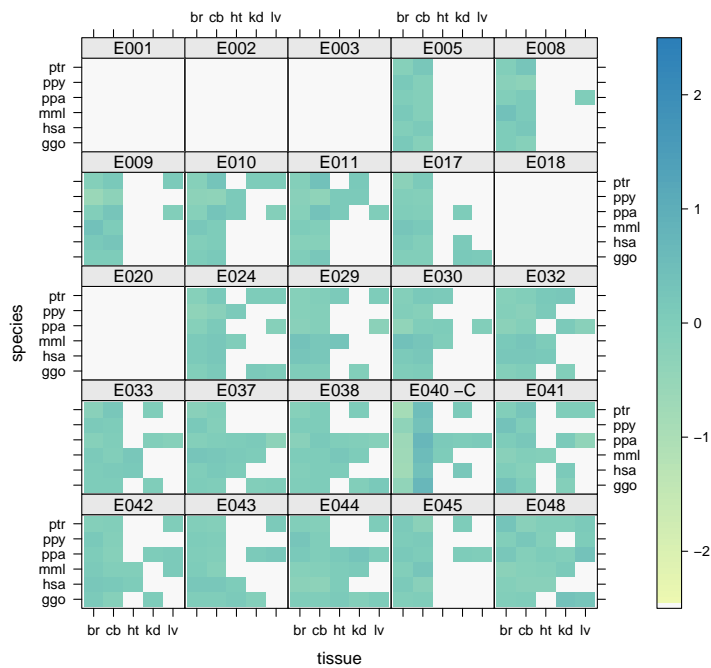

ENSG0000155849

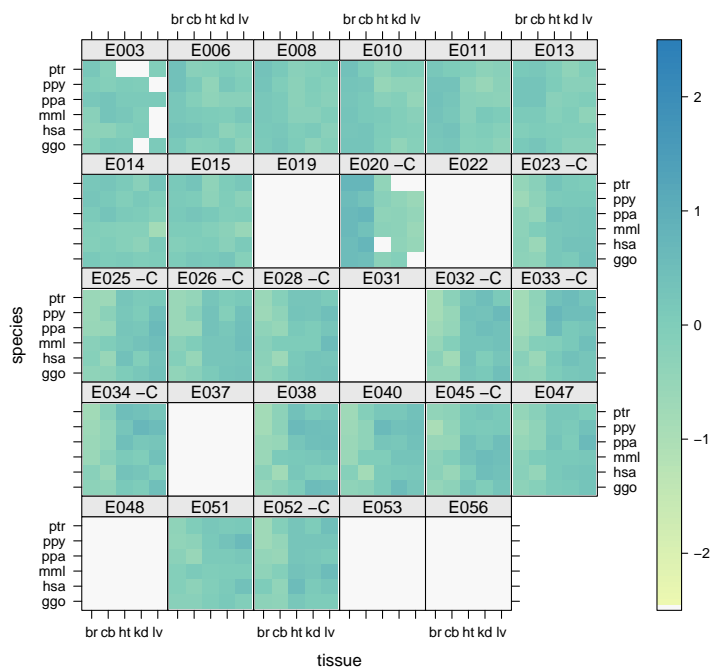

ENSG0000156113

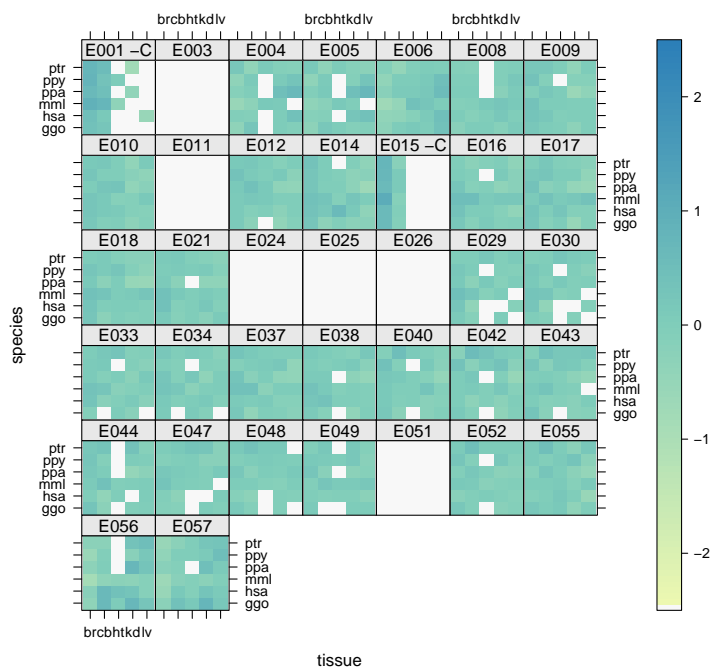

ENSG00000156256

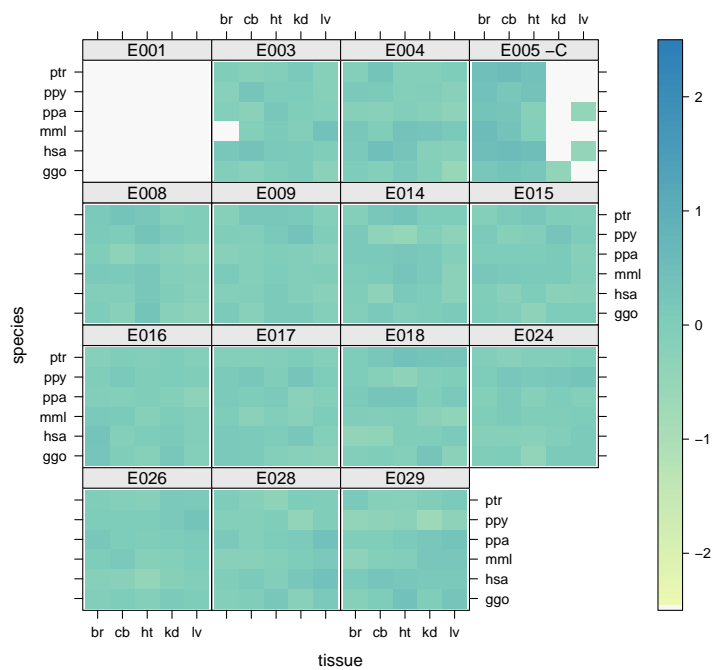

ENSG00000156463

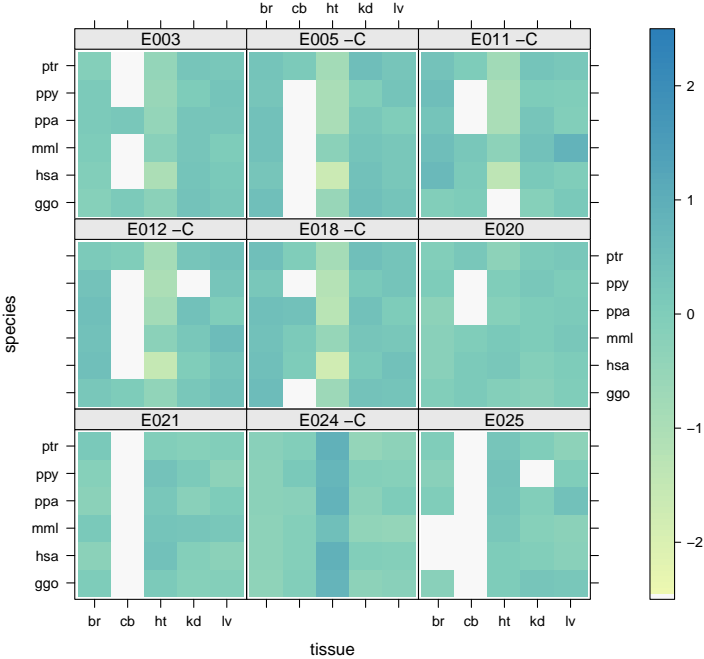



ENSG00000157087

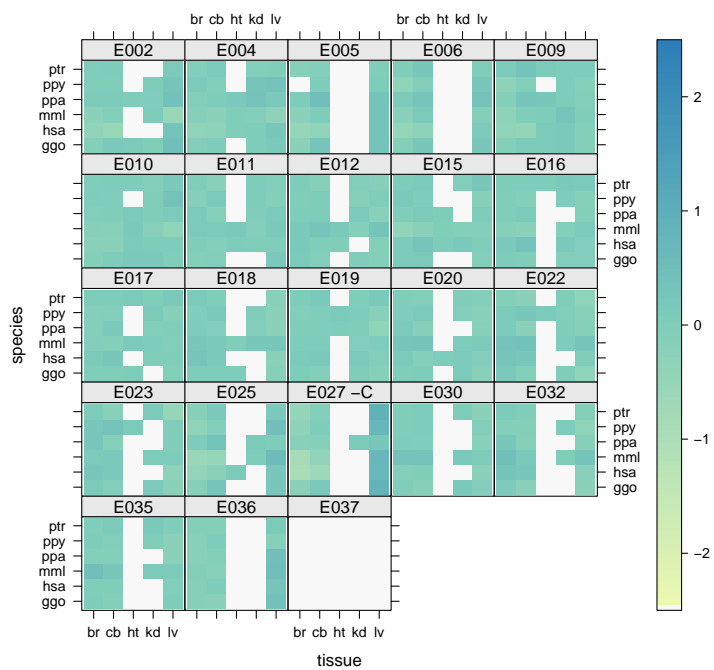









ENSG00000157193

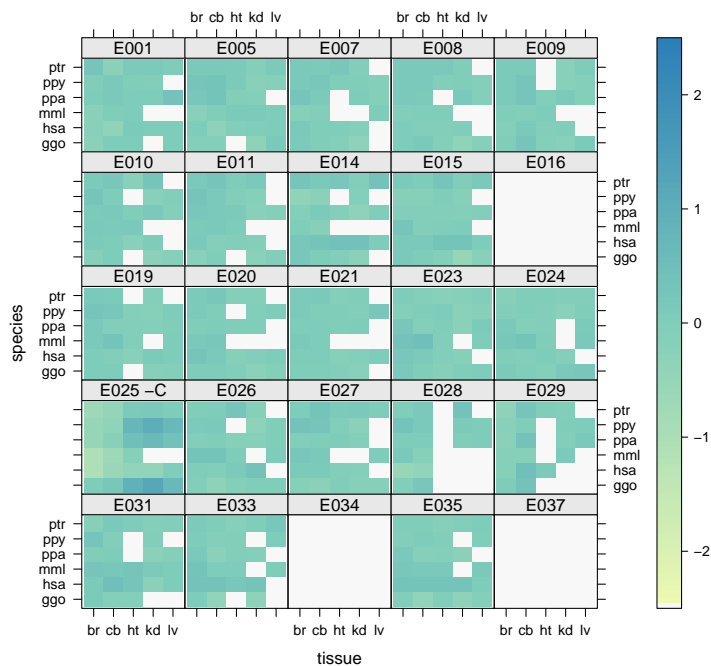







ENSG00000158882

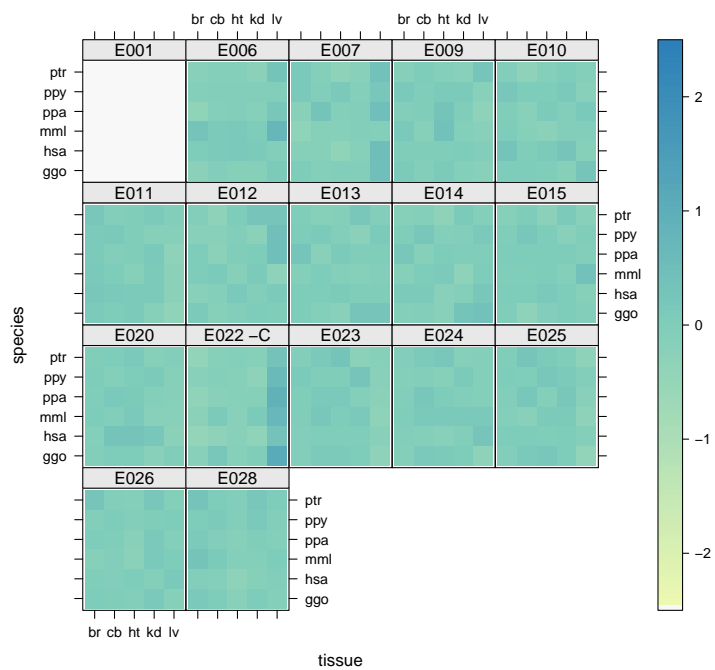





ENSG00000159228

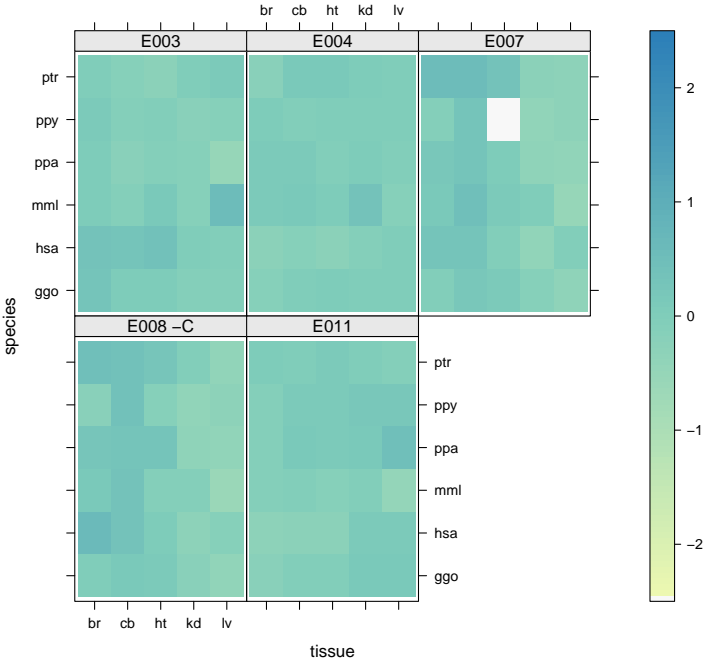

ENSG00000159753

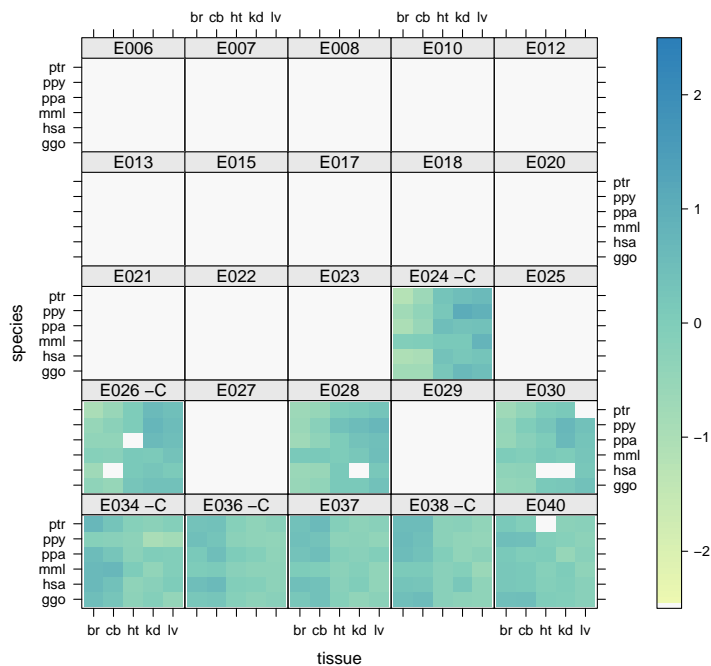







ENSG00000160404

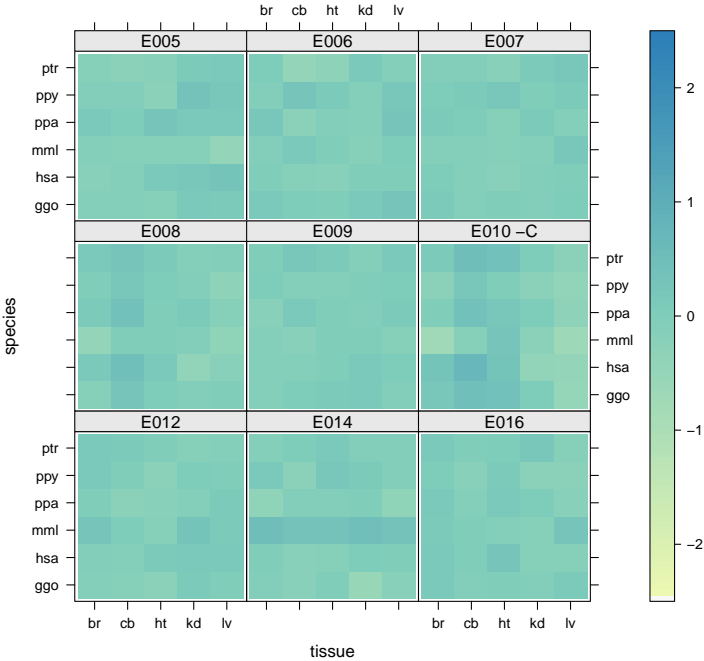

ENSG00000160460

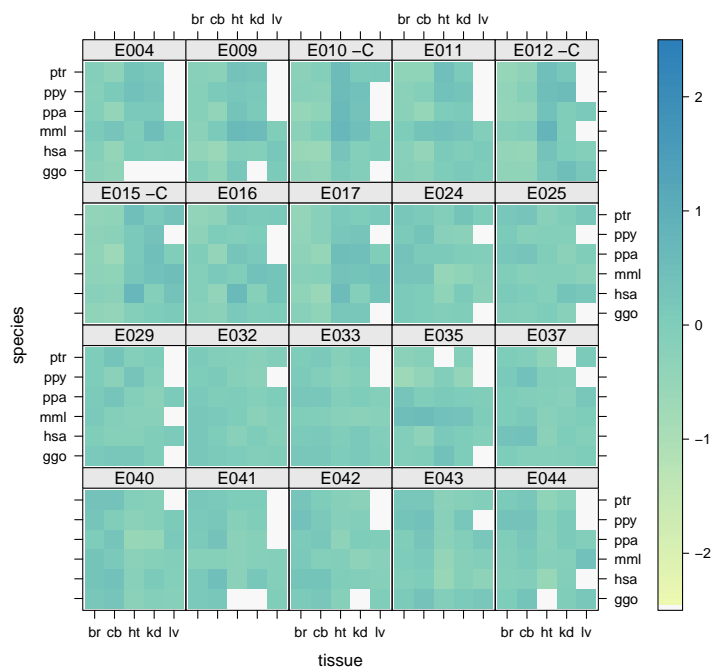

ENSG00000160753

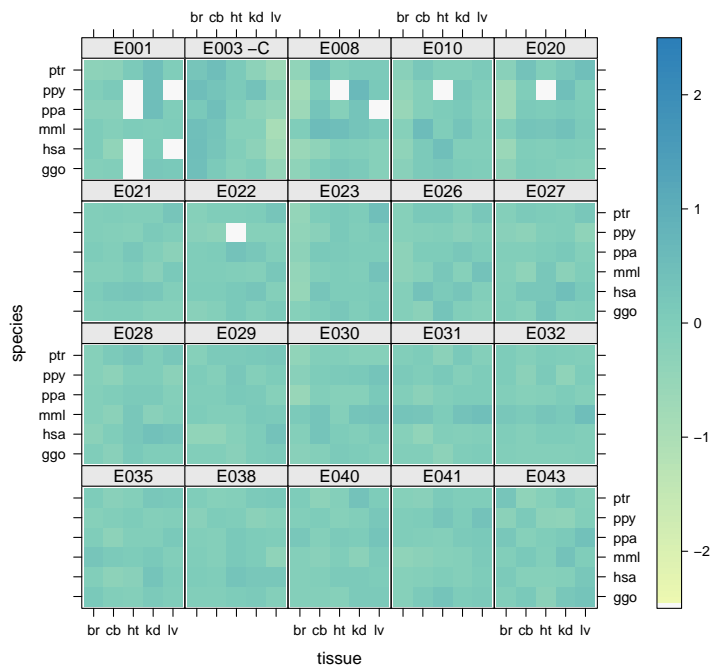





ENSG00000160972

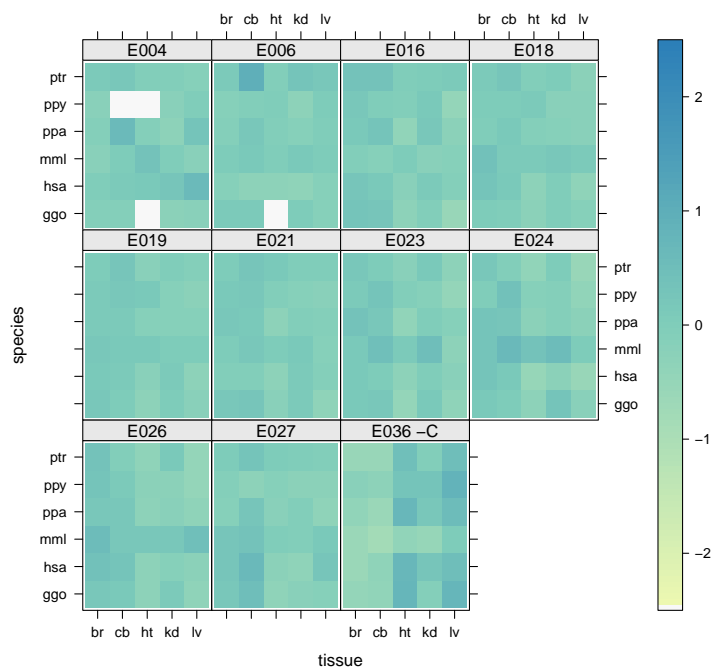





ENSG00000163032

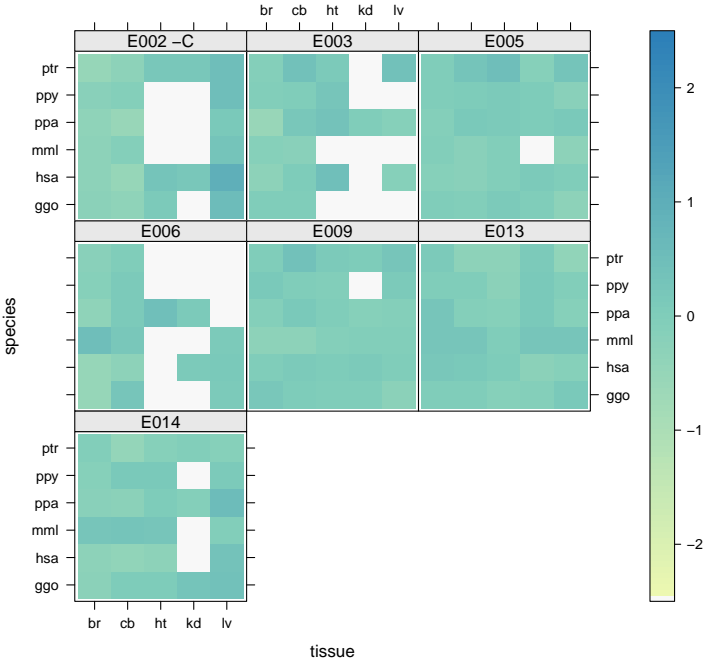



ENSG00000163170

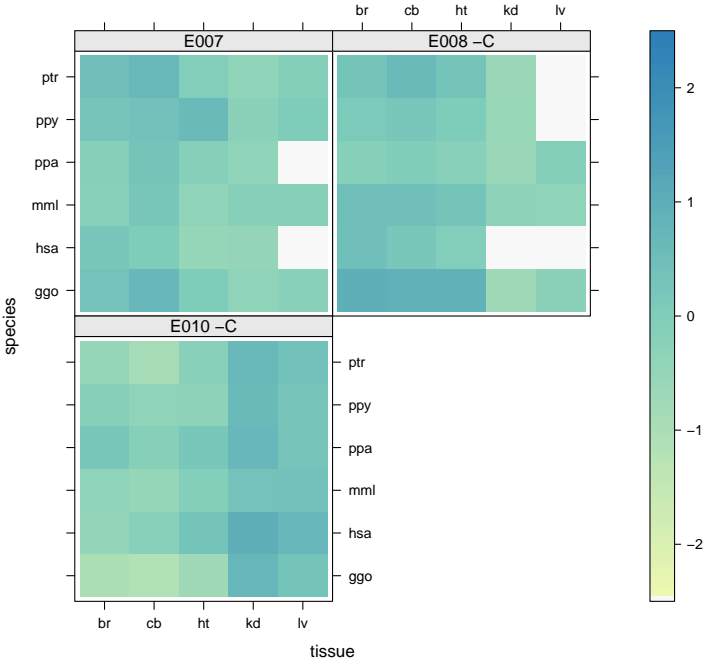

ENSG00000163412

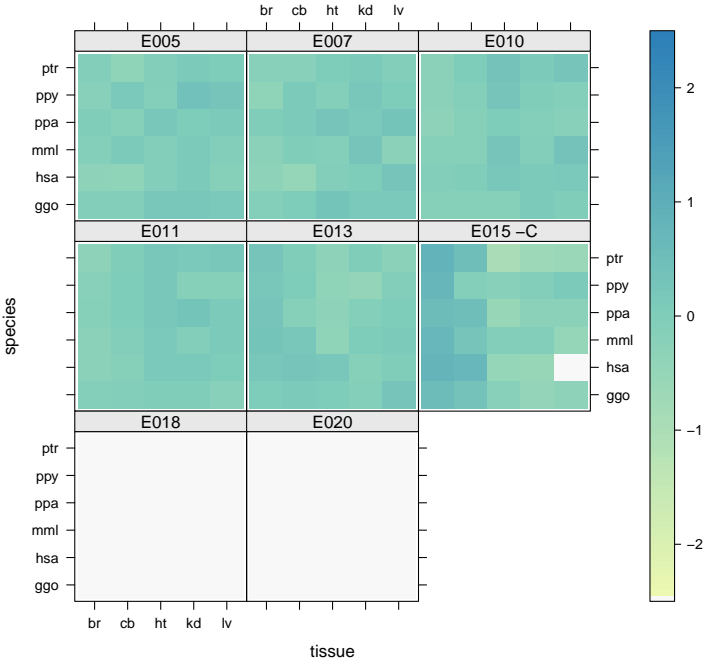





ENSG0000163638

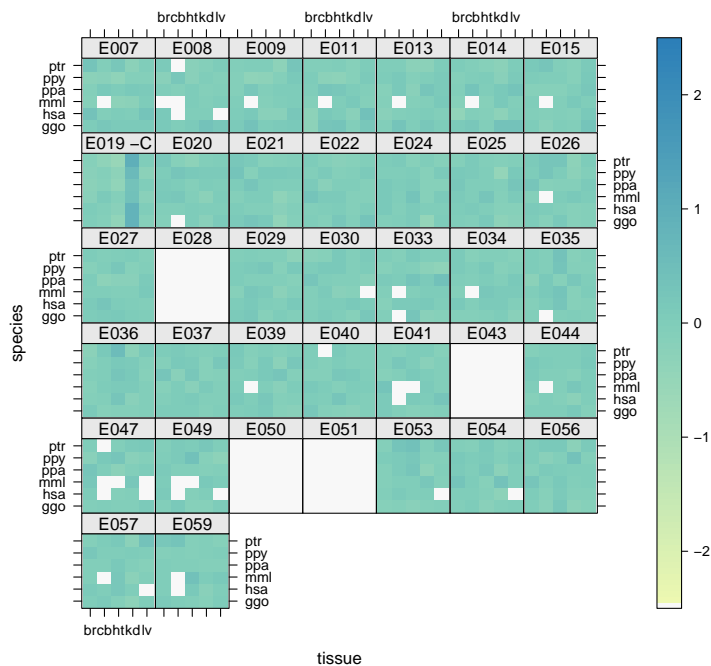





ENSG00000164022

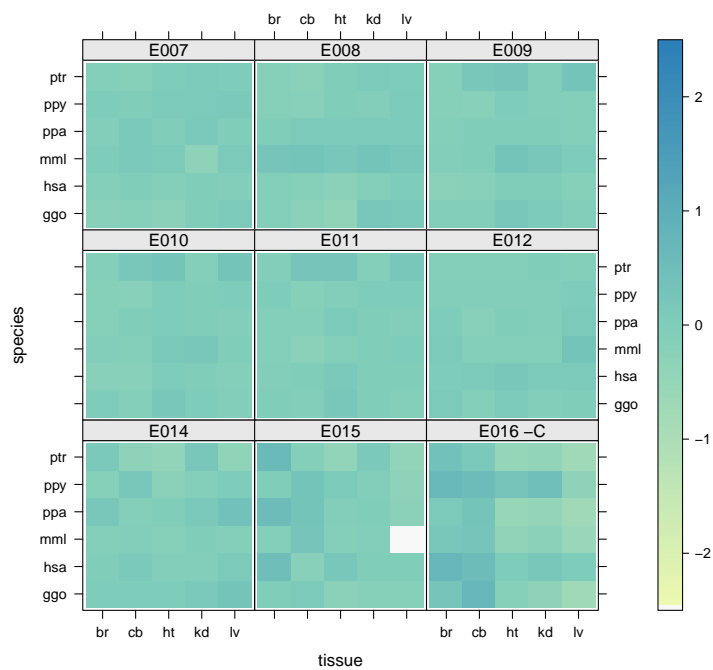



ENSG0000164199

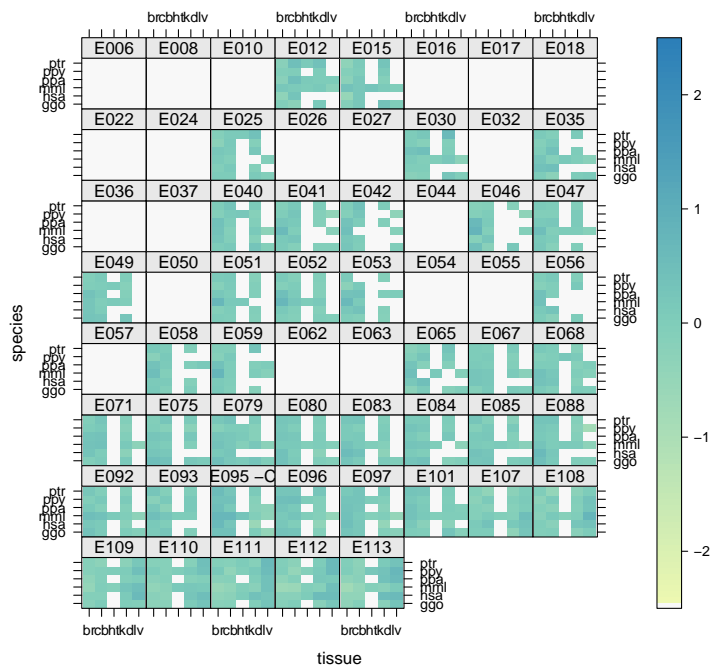

ENSG00000164237

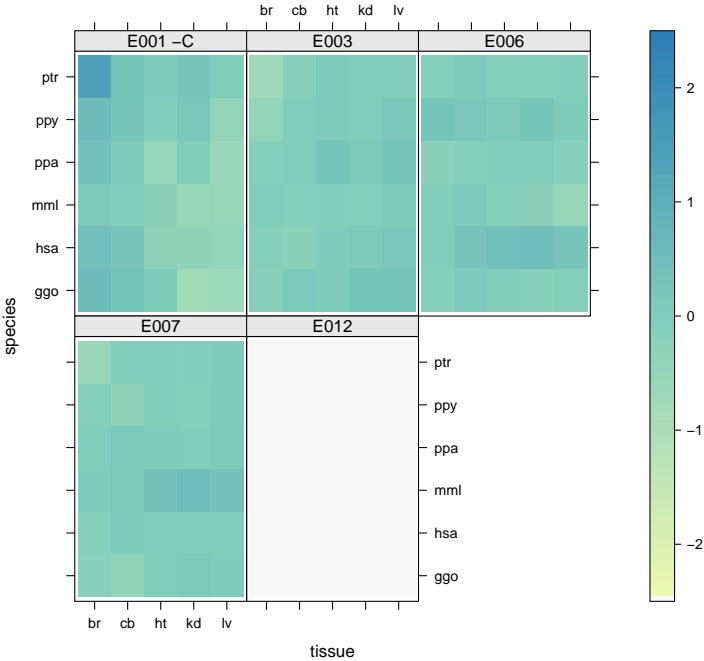















ENSG00000165609

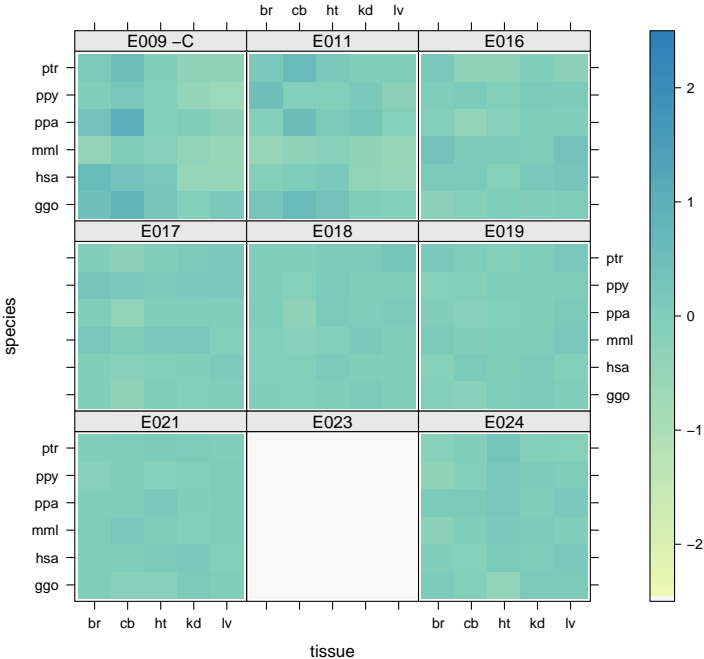

ENSG00000165802

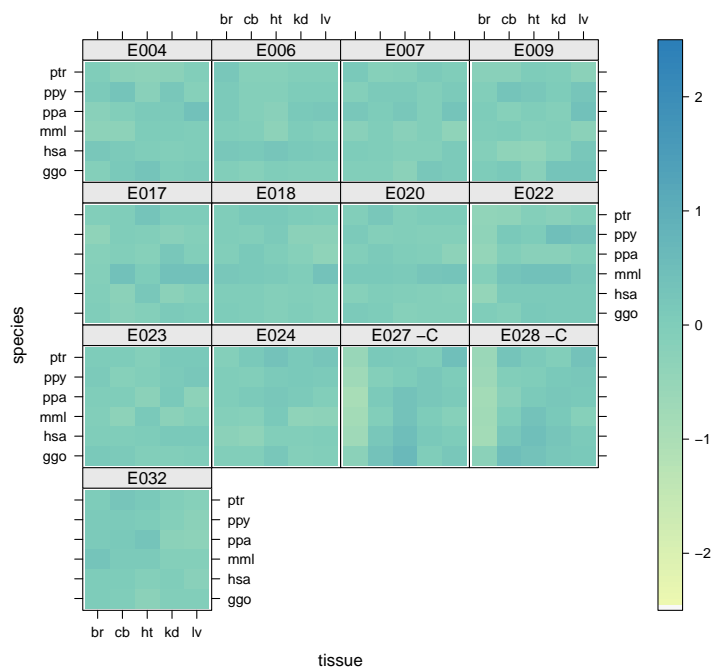







ENSG00000165995

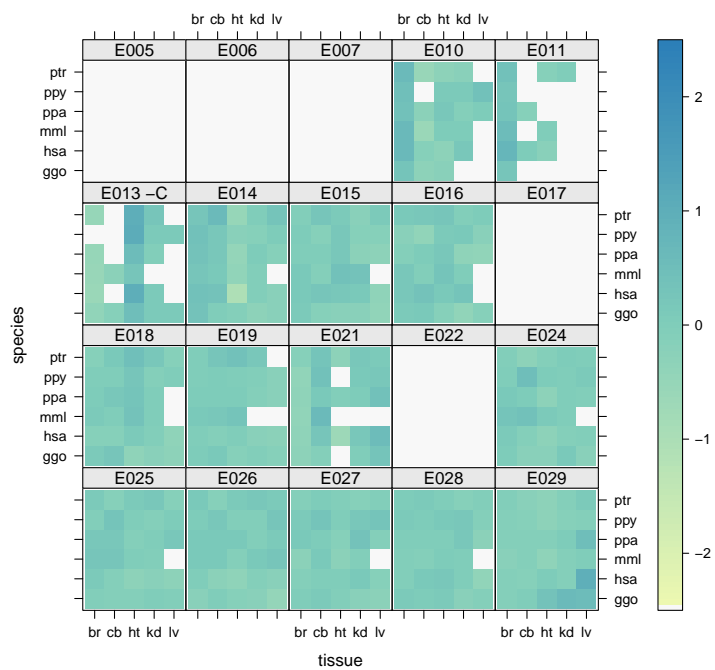

ENSG0000166387

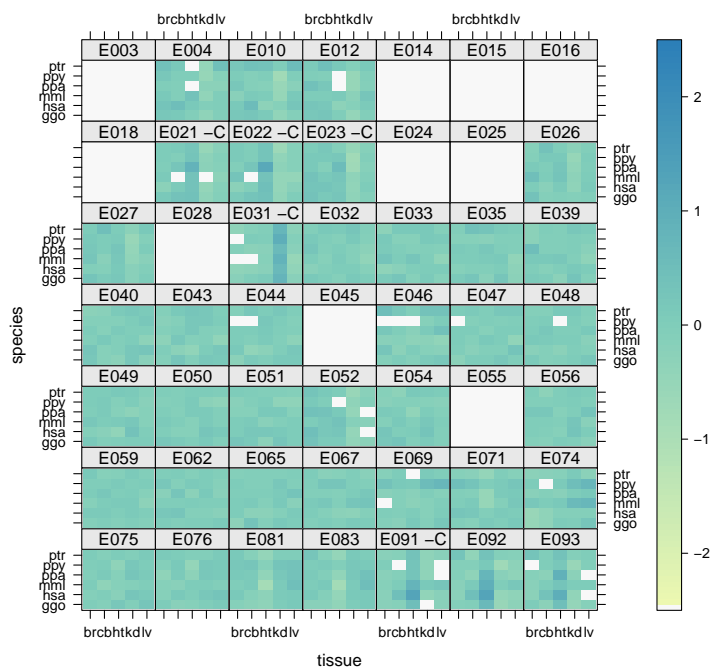

ENSG0000166689

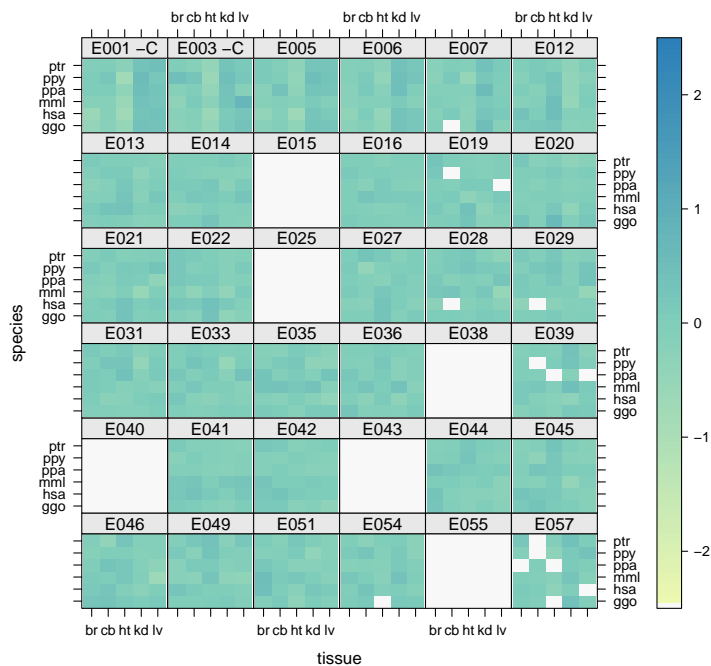



ENSG0000166833

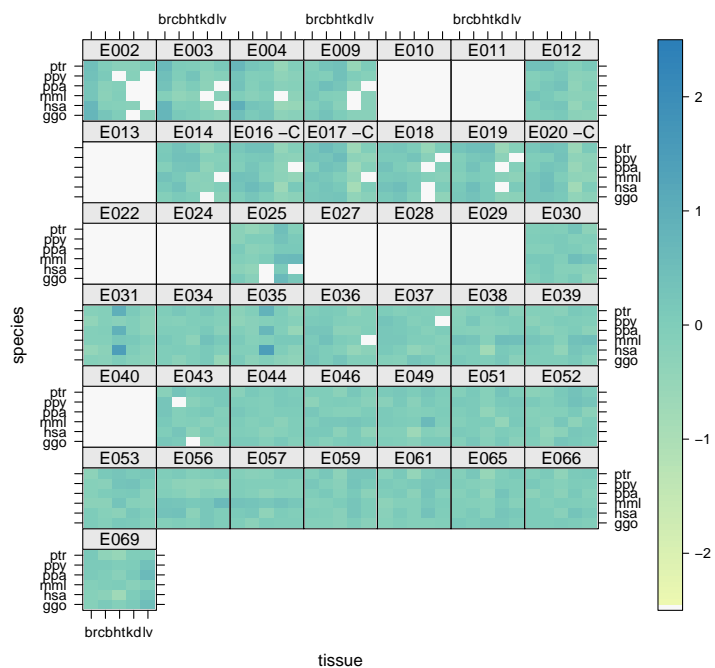

ENSG00000166974

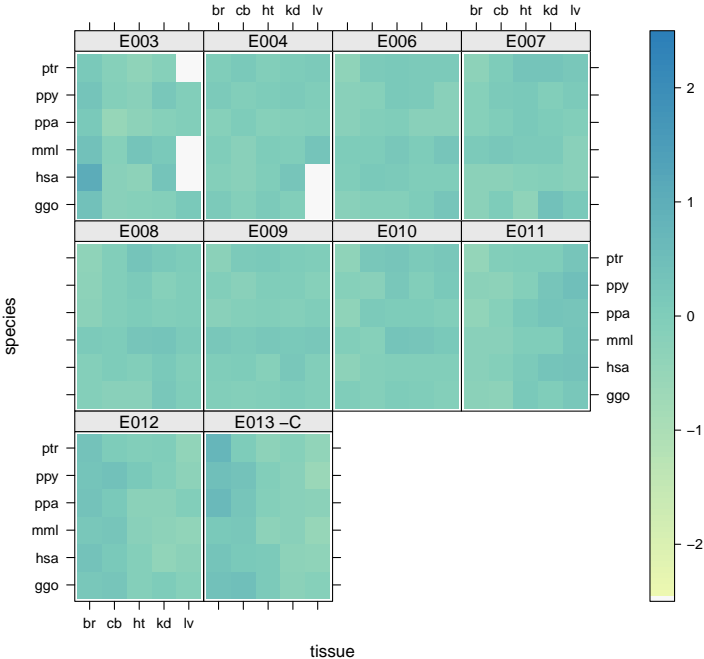







ENSG00000167700

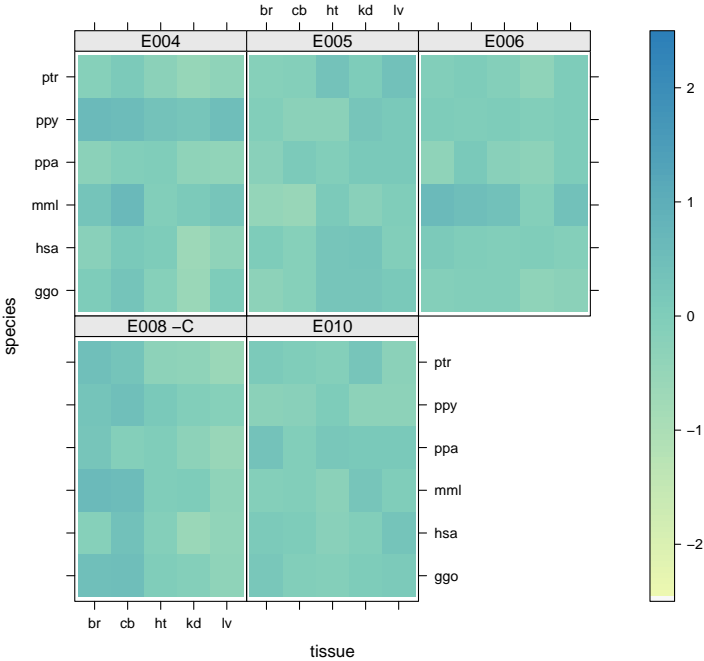



ENSG0000167986

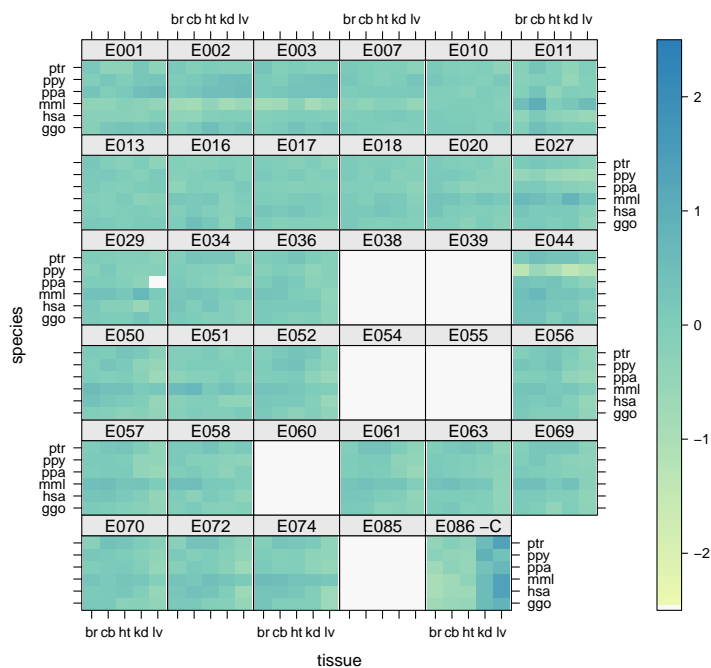

ENSG00000167995

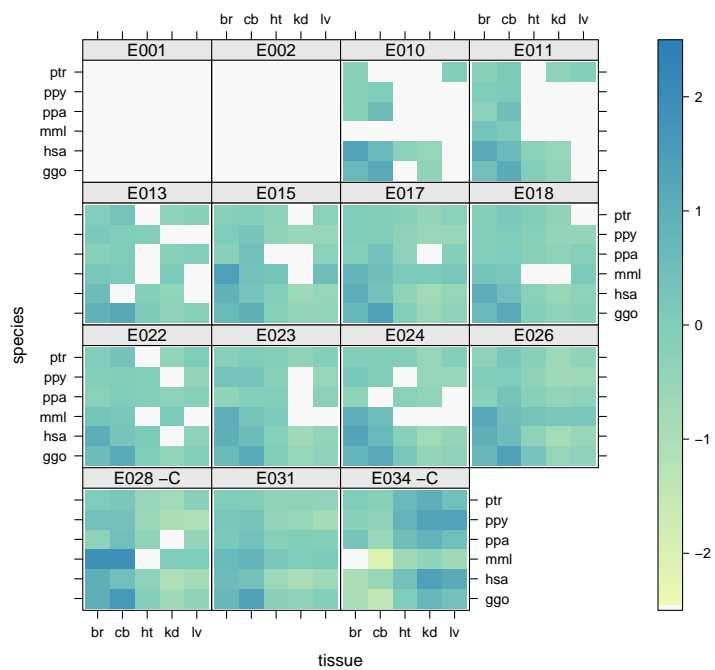



ENSG0000168036

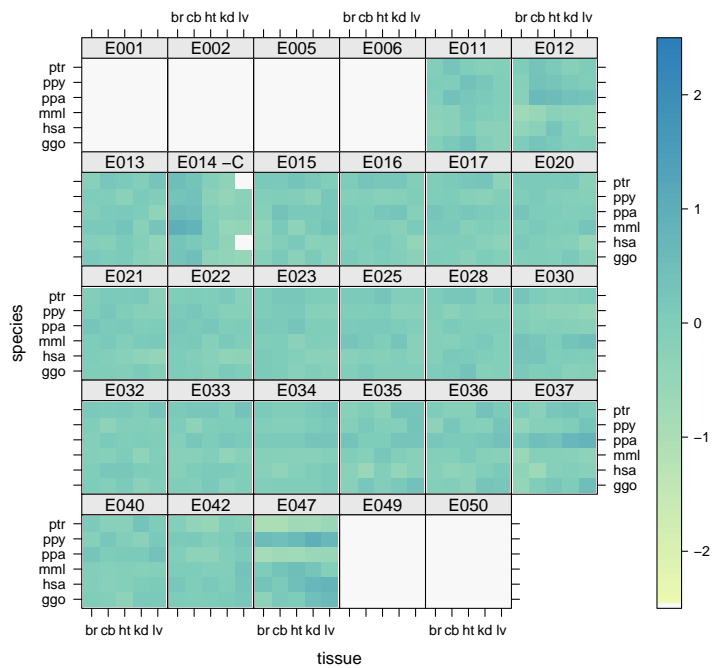



ENSG00000168273

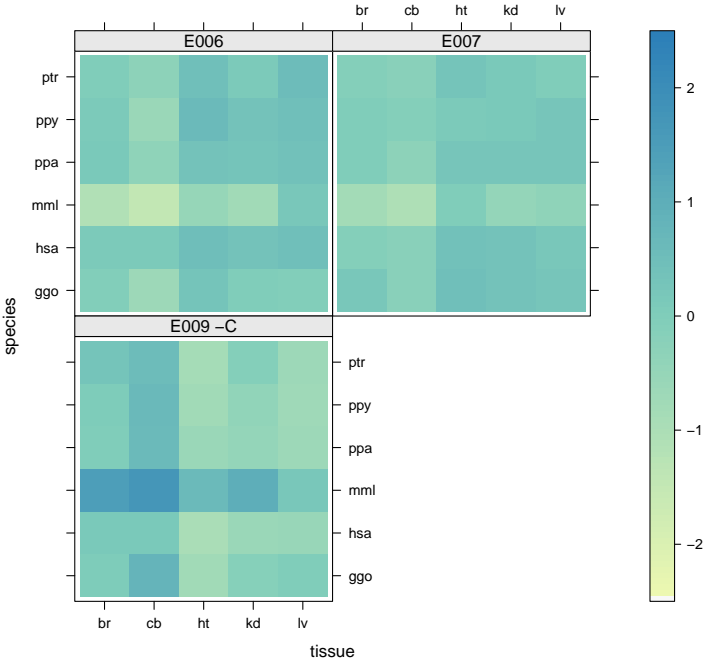

ENSG00000168297

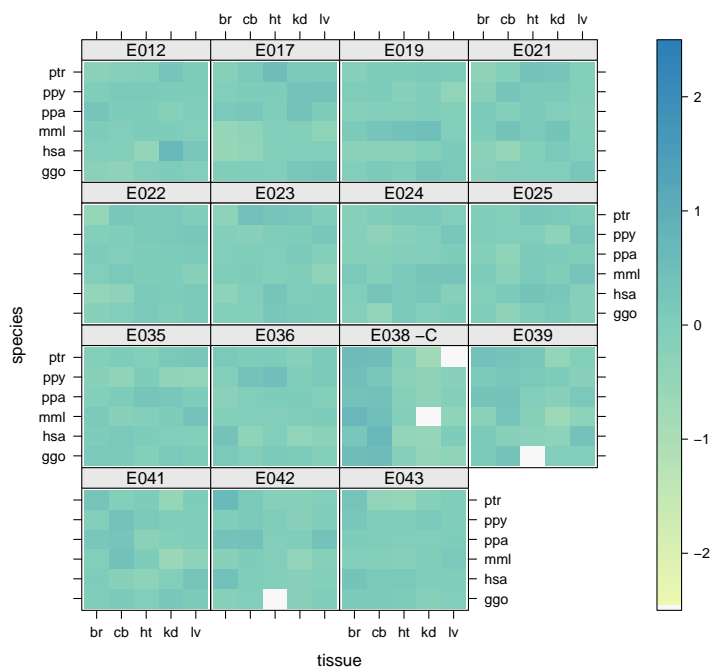



ENSG0000168904

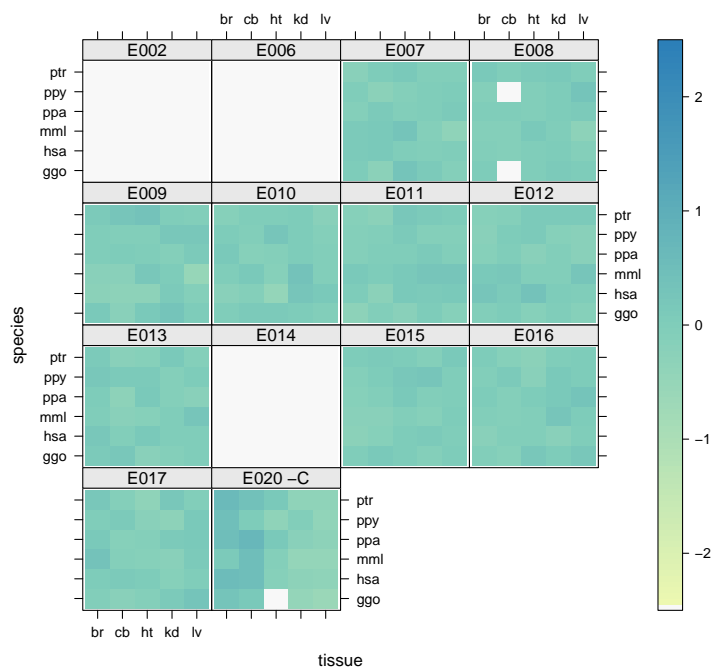



ENSG00000169282

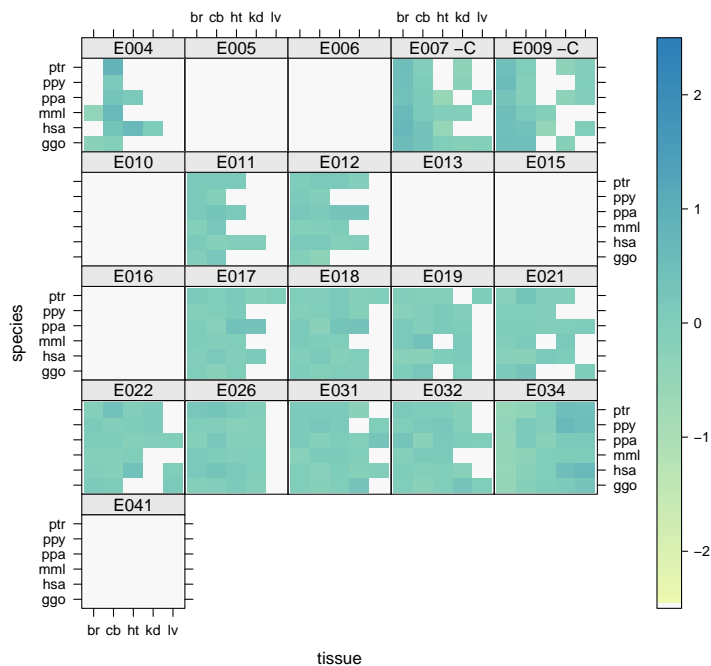

ENSG00000169314

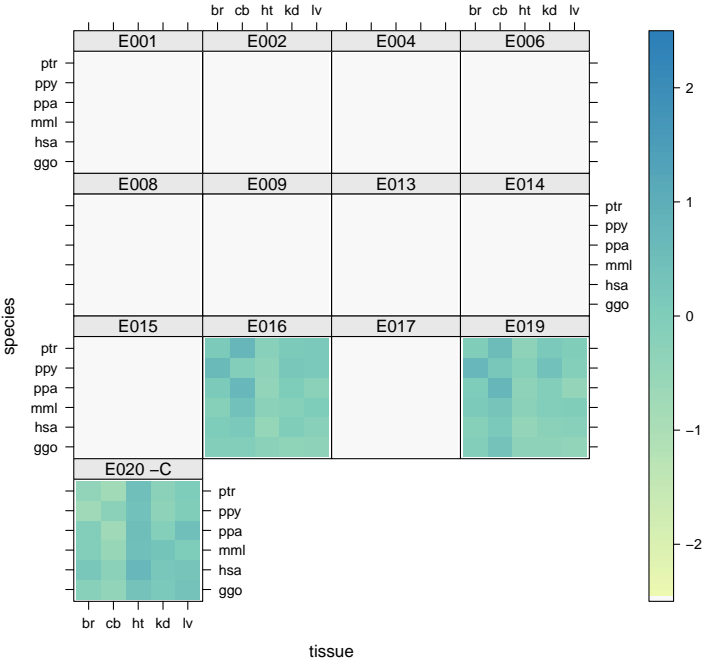







ENSG00000169764

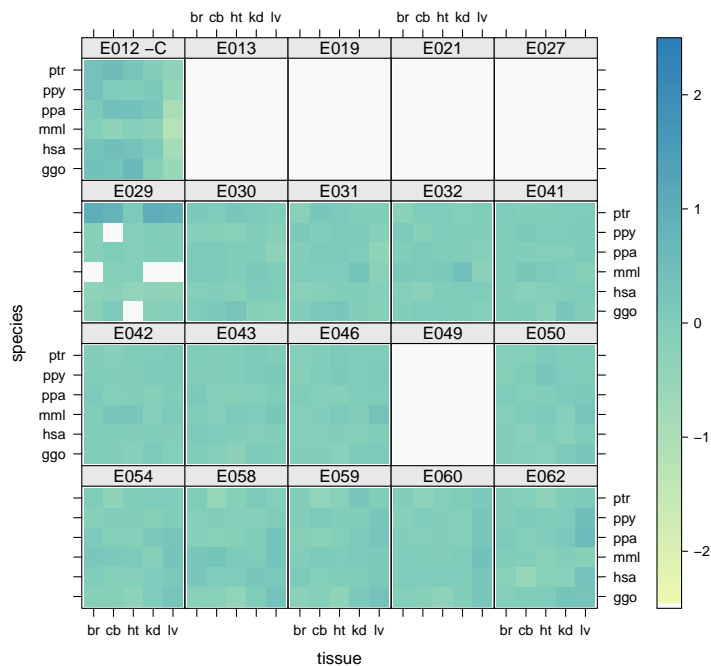





ENSG00000170482

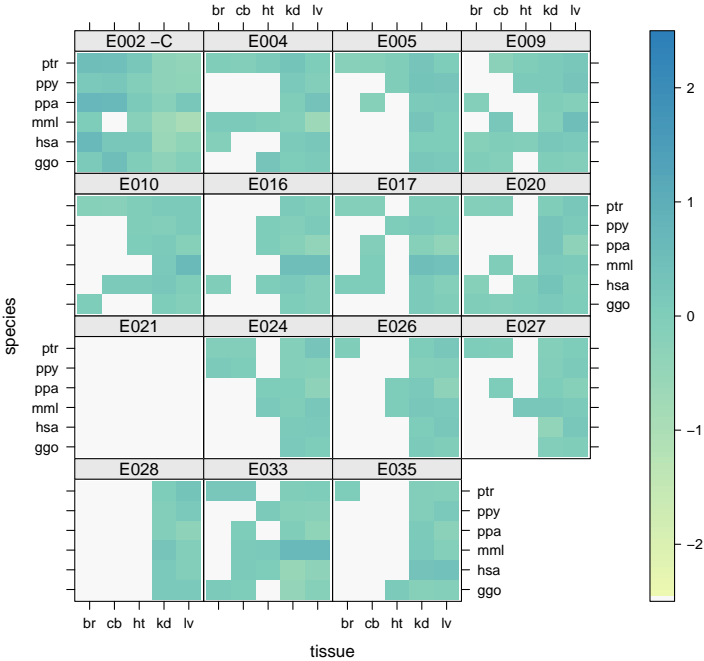









ENSG00000171723

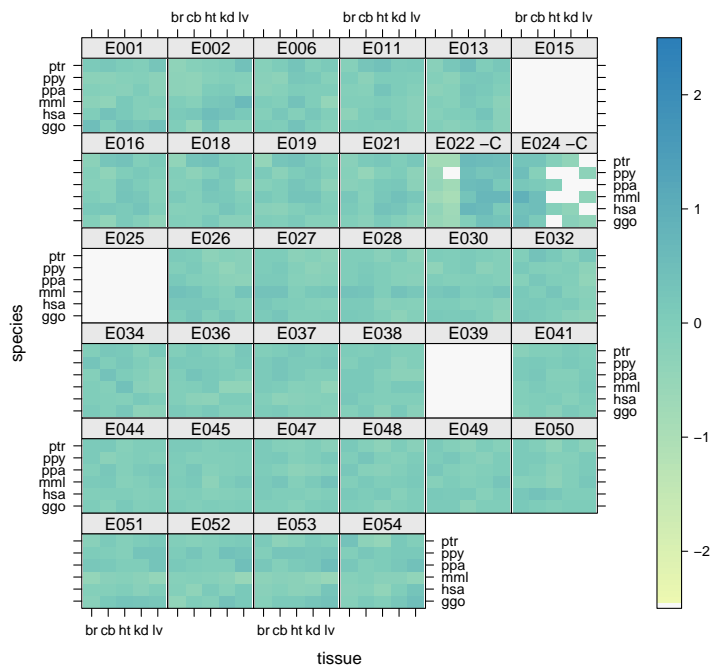



ENSG0000171914

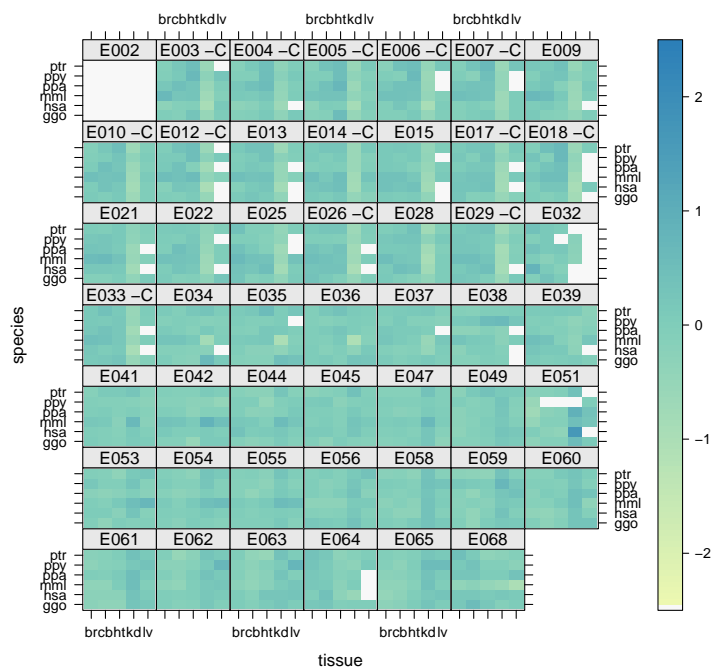

ENSG00000171992

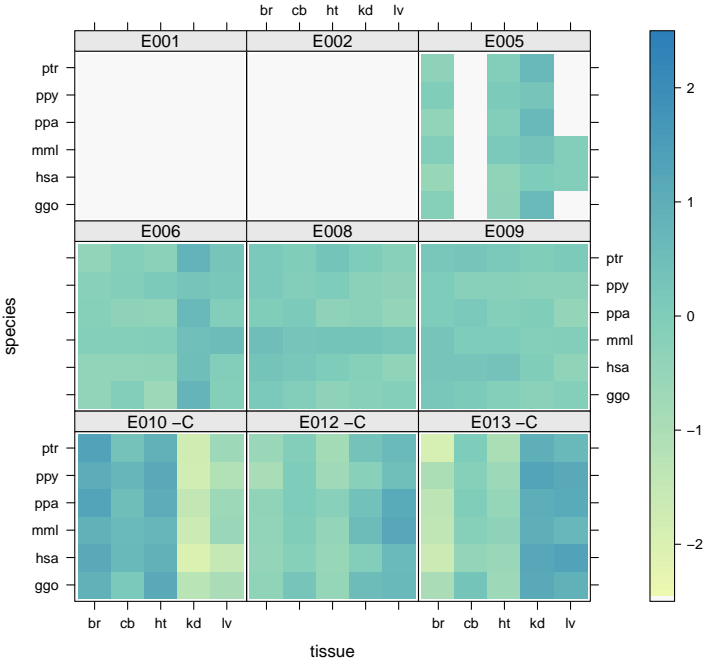



ENSG00000172348

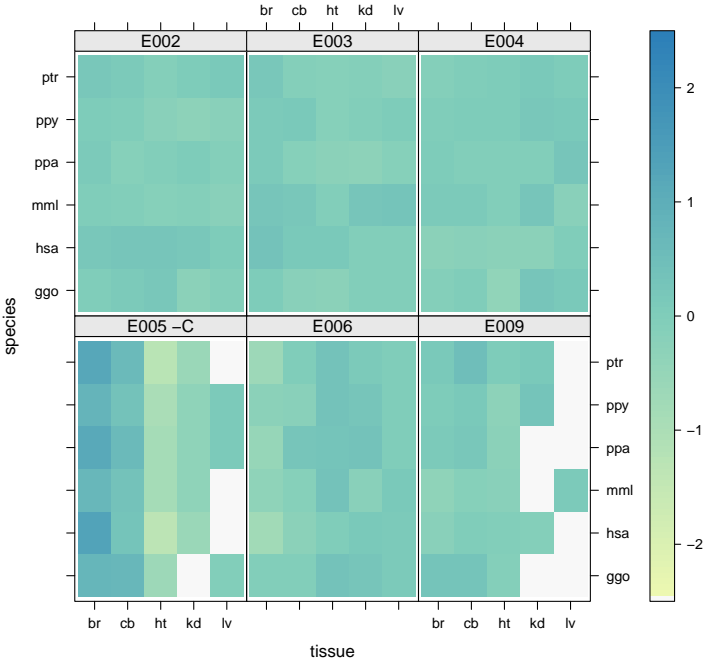

ENSG00000172349

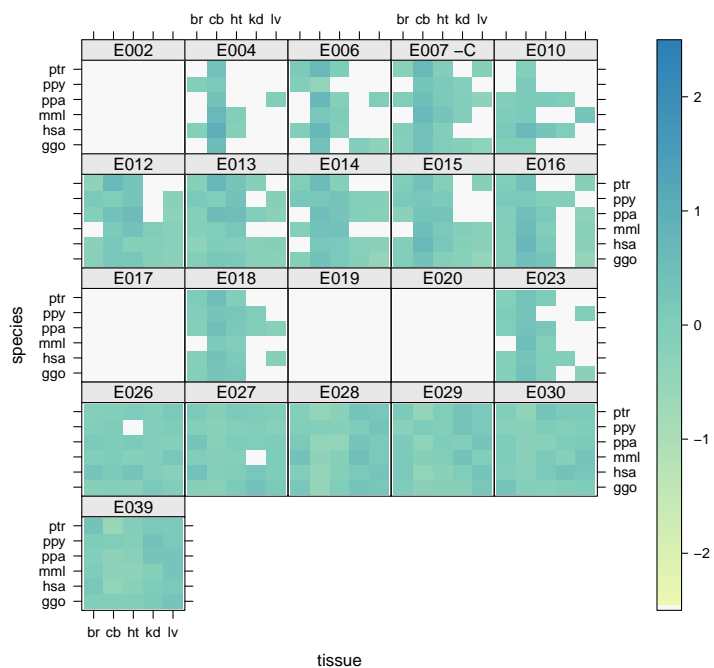

ENSG00000172375

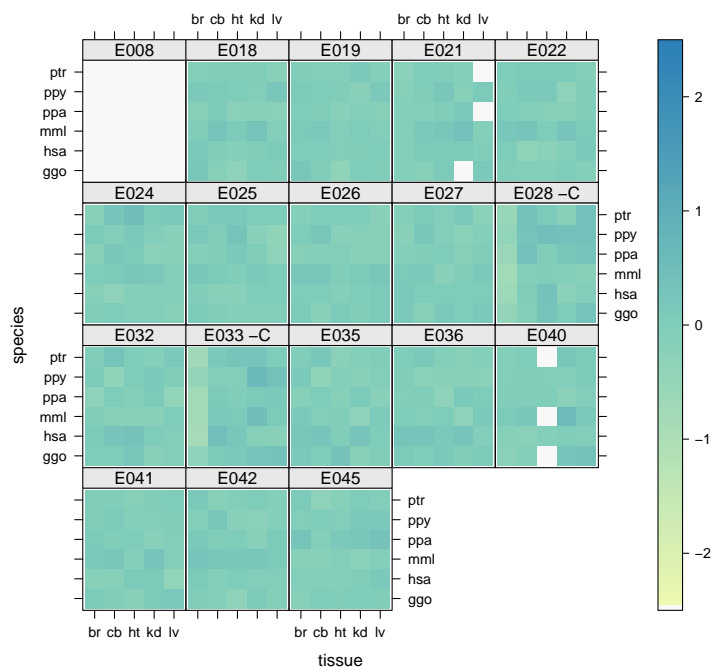



ENSG00000172594

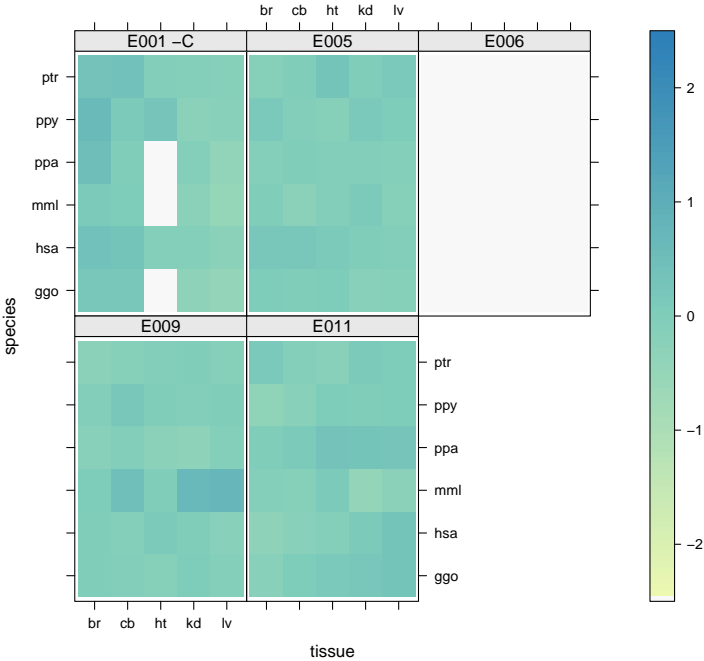

ENSG00000172731

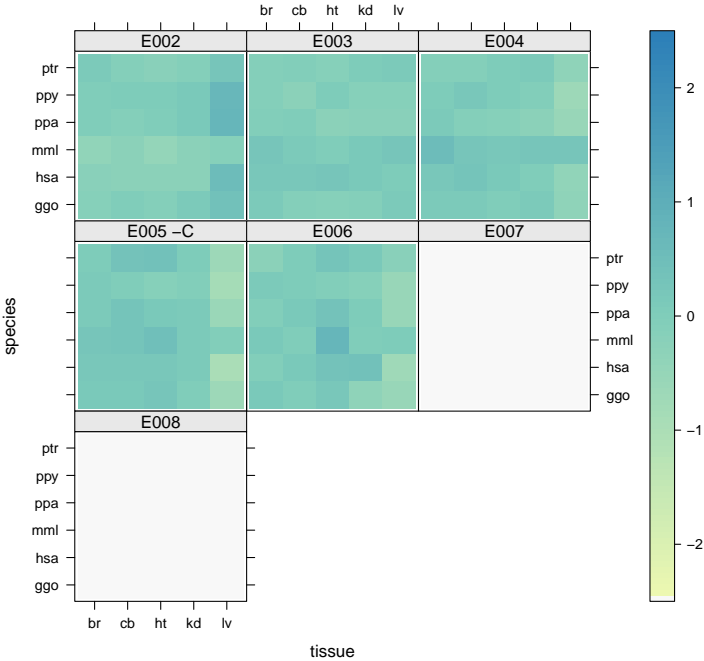



ENSG00000172794

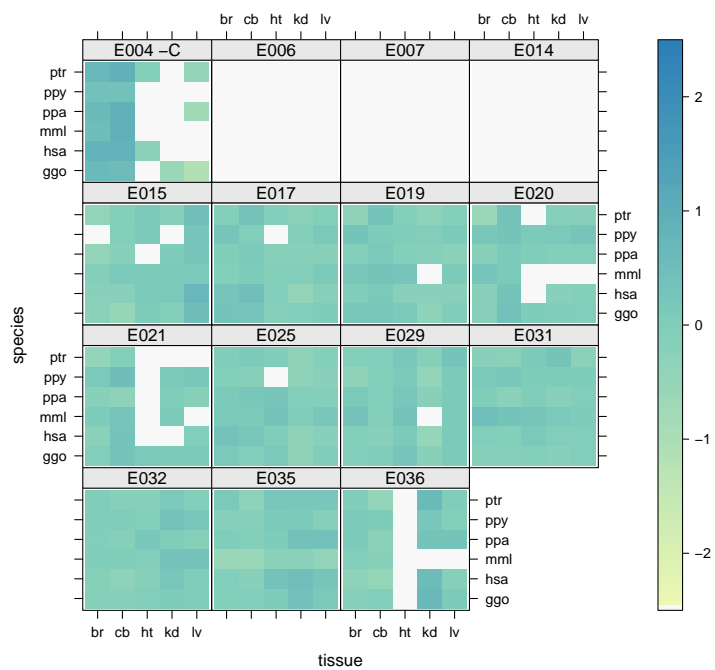

ENSG00000173020

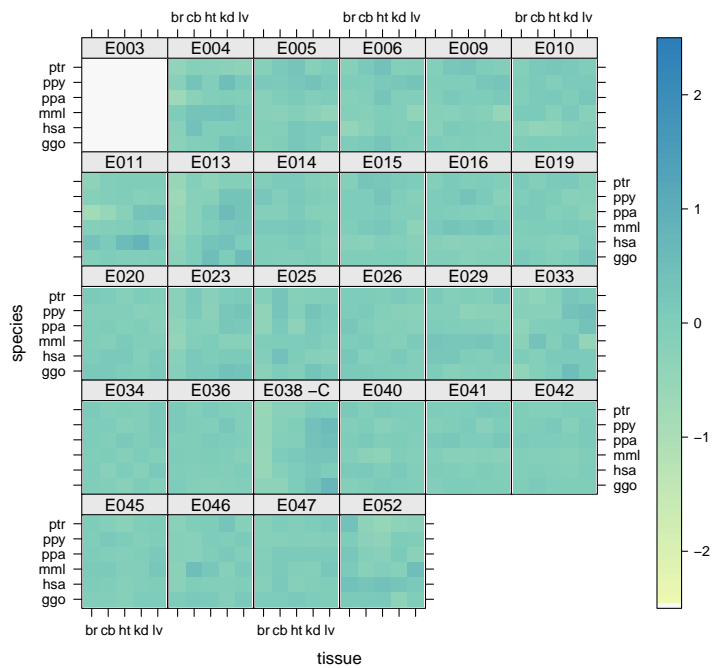



ENSG00000173210

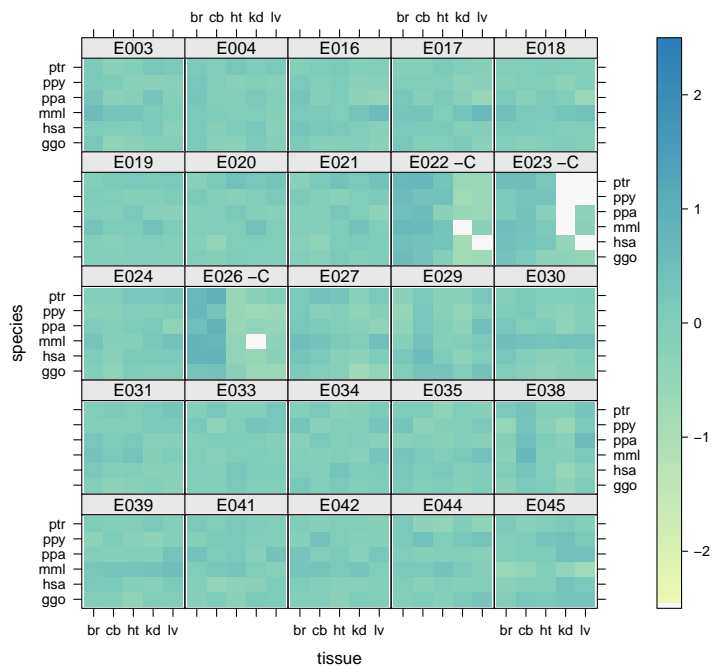





ENSG00000173442

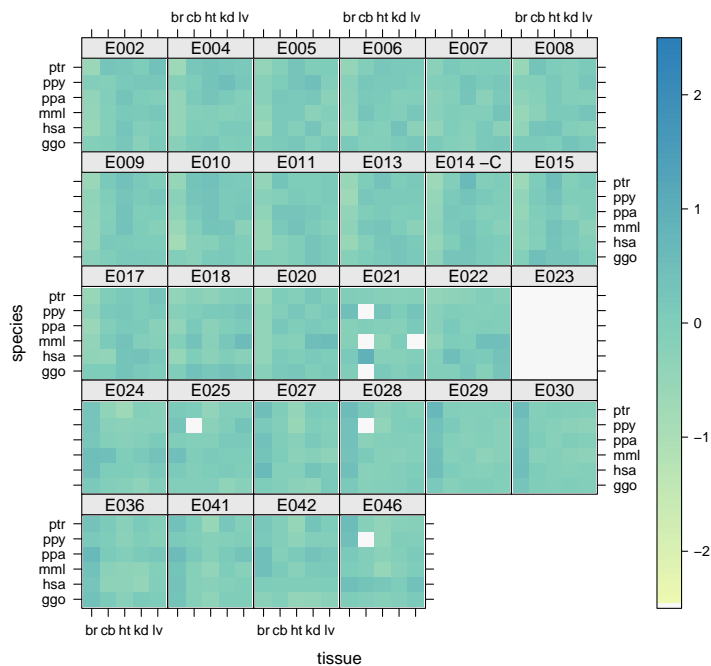

ENSG00000173641

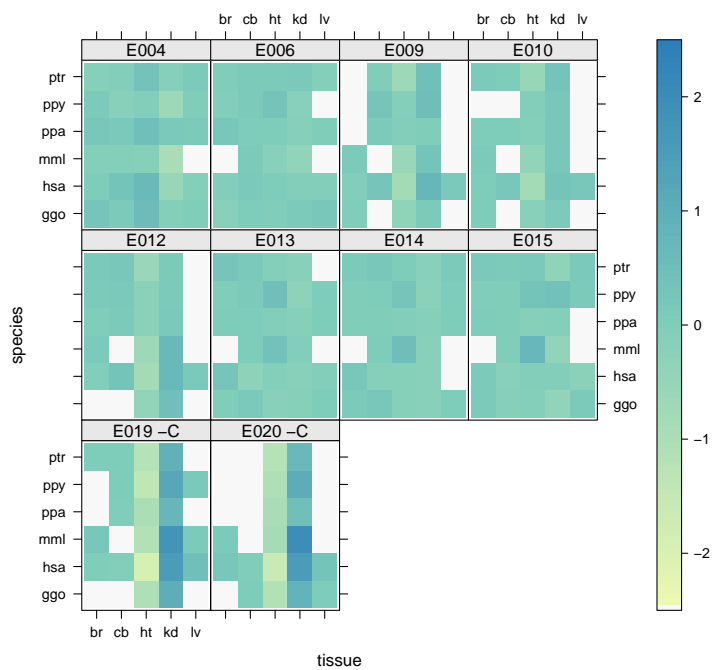



ENSG00000173848

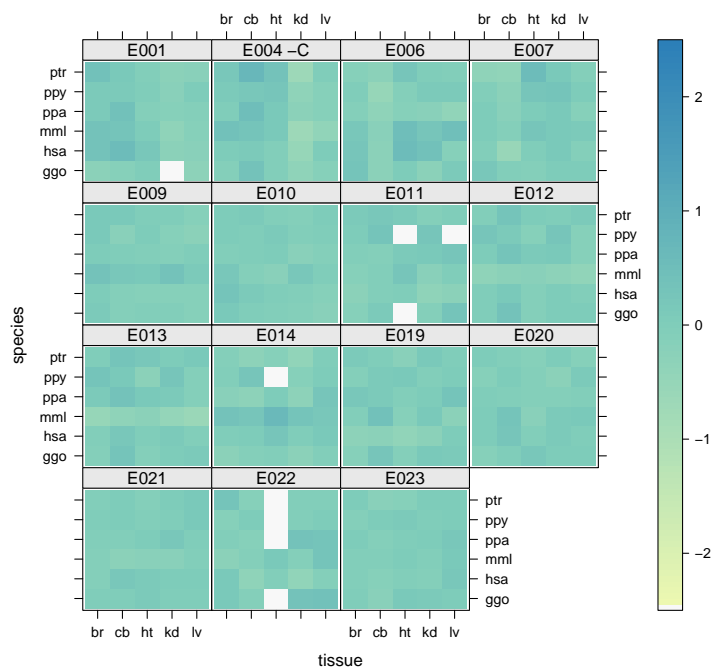



ENSG00000174373

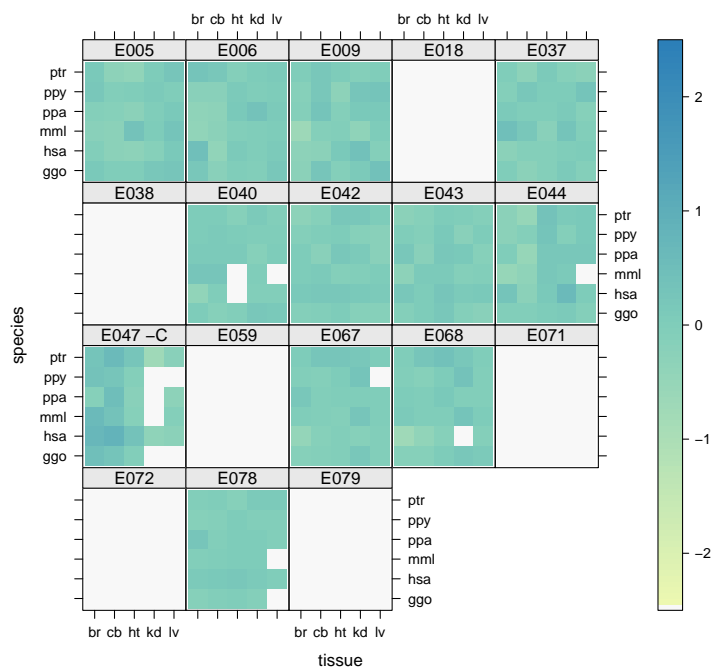



ENSG00000174514

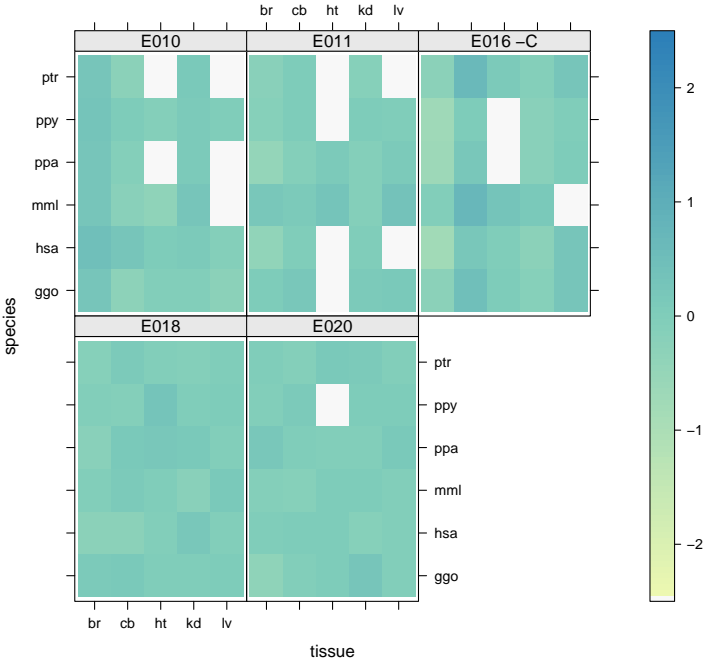









ENSG00000175416

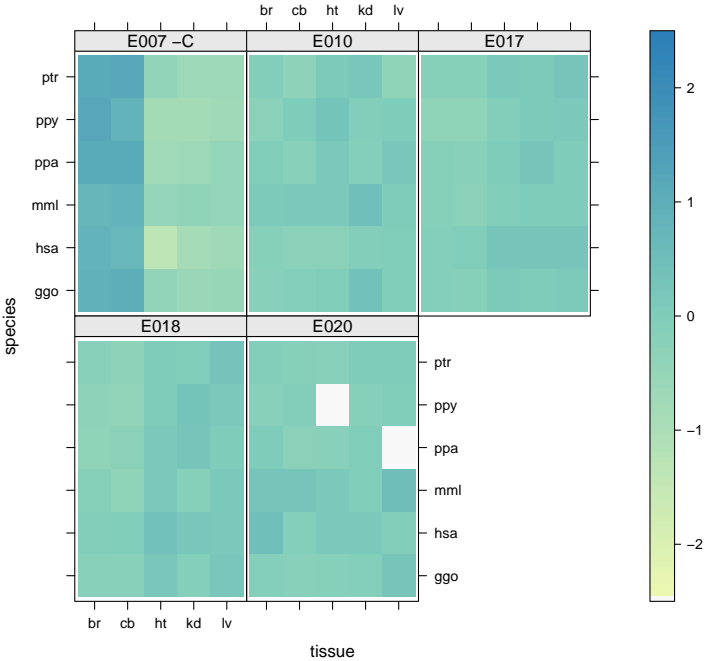















ENSG00000176463

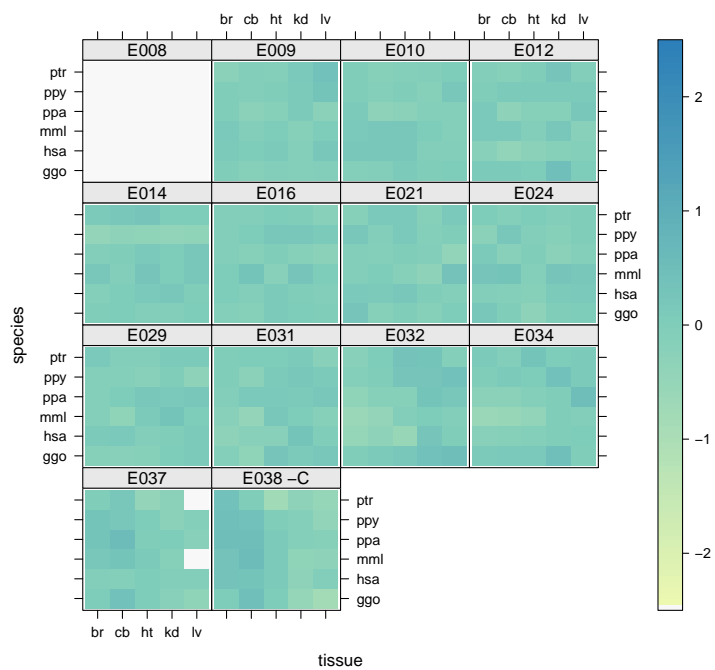

ENSG00000177030

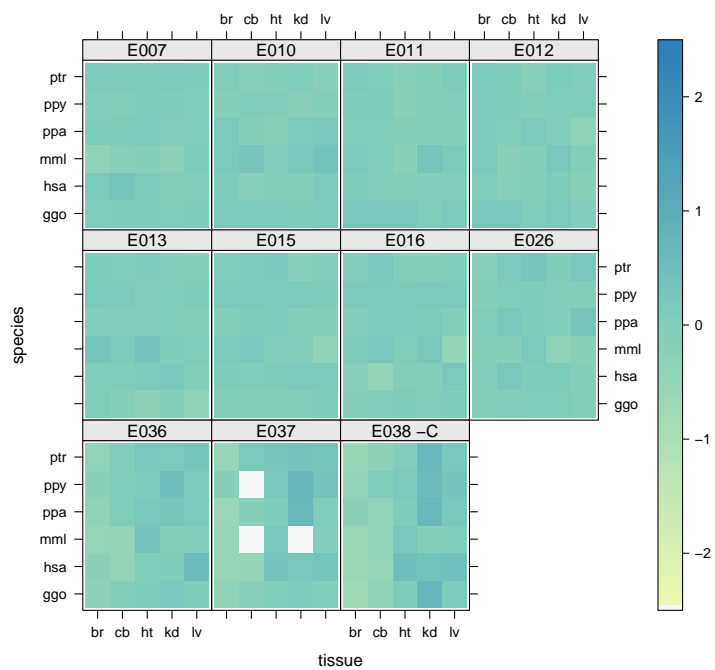

ENSG00000177380

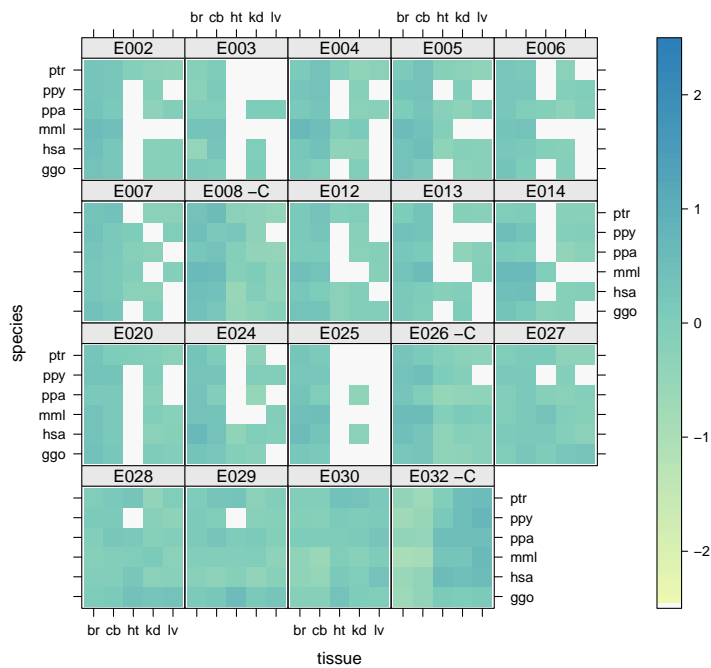









ENSG00000179134

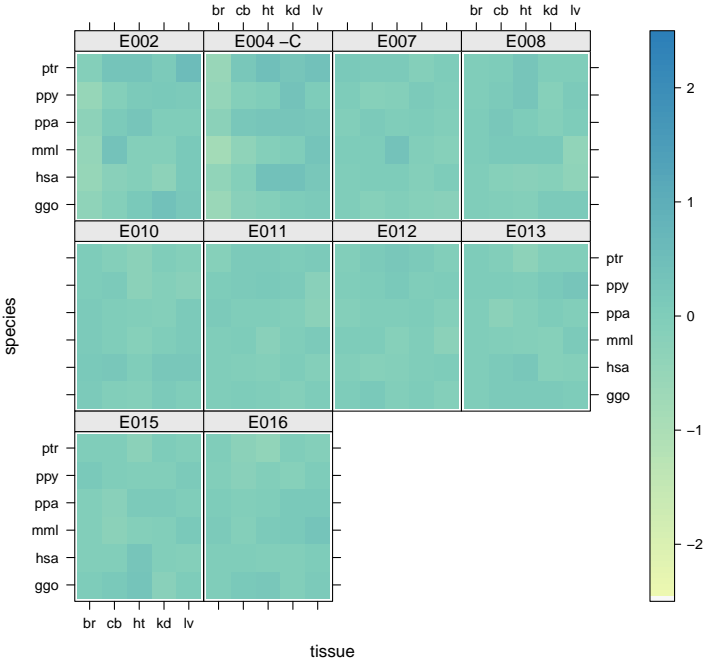







ENSG00000181982

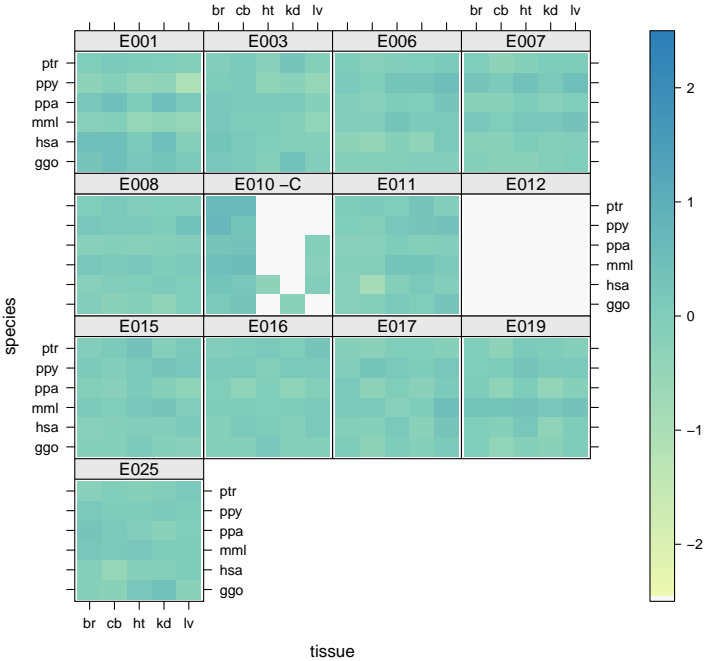

ENSG00000182359

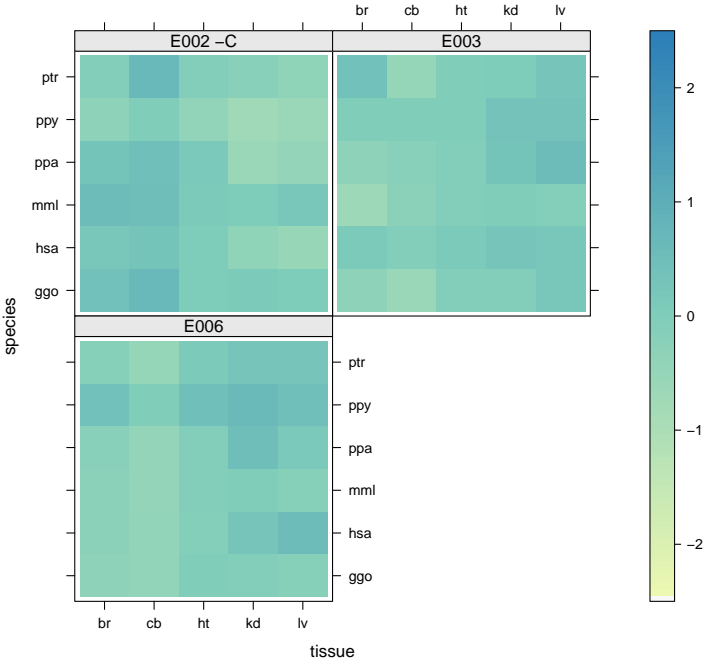



ENSG00000182667

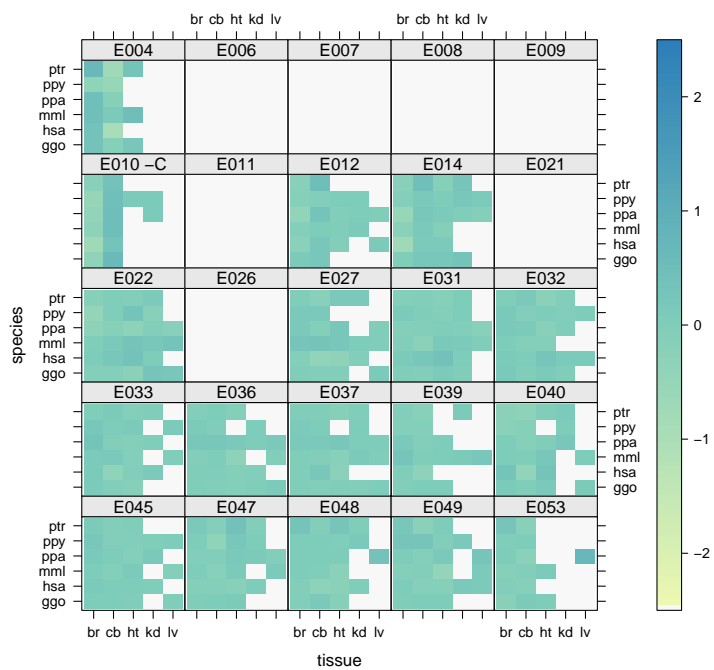



ENSG00000182944

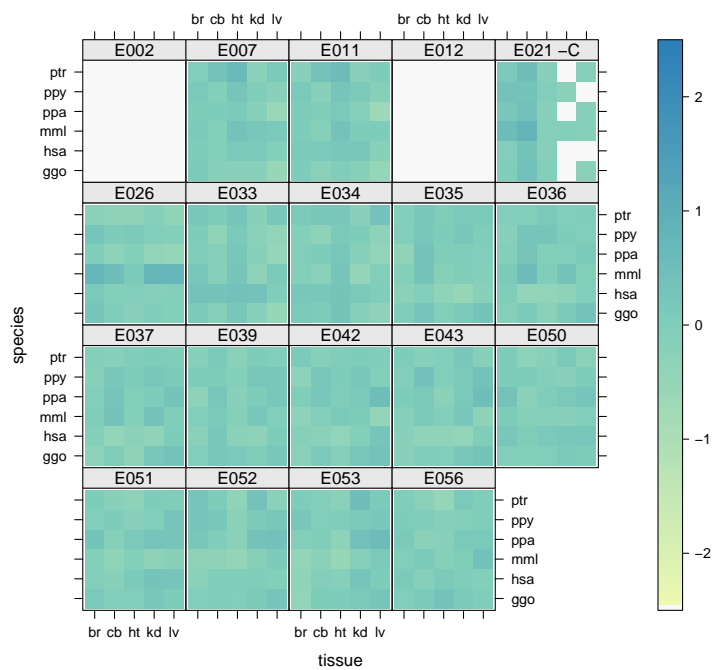

ENSG00000182985

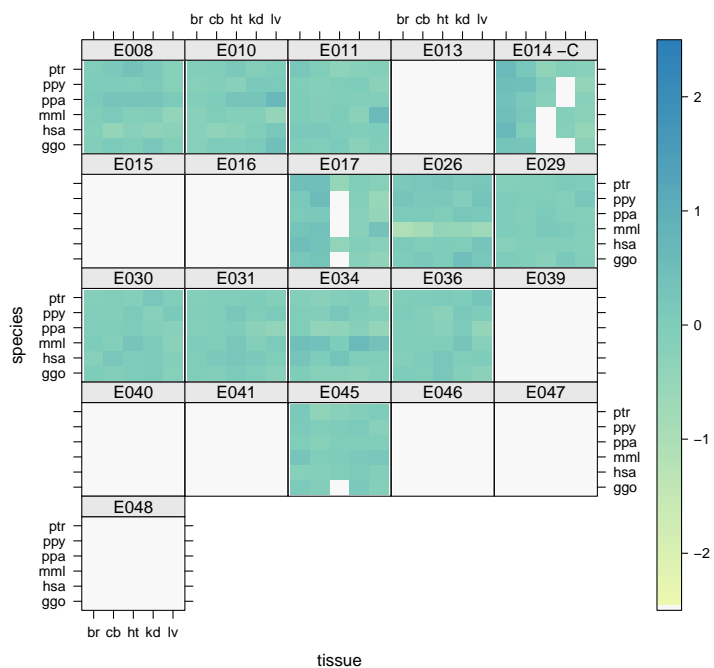

ENSG0000183023

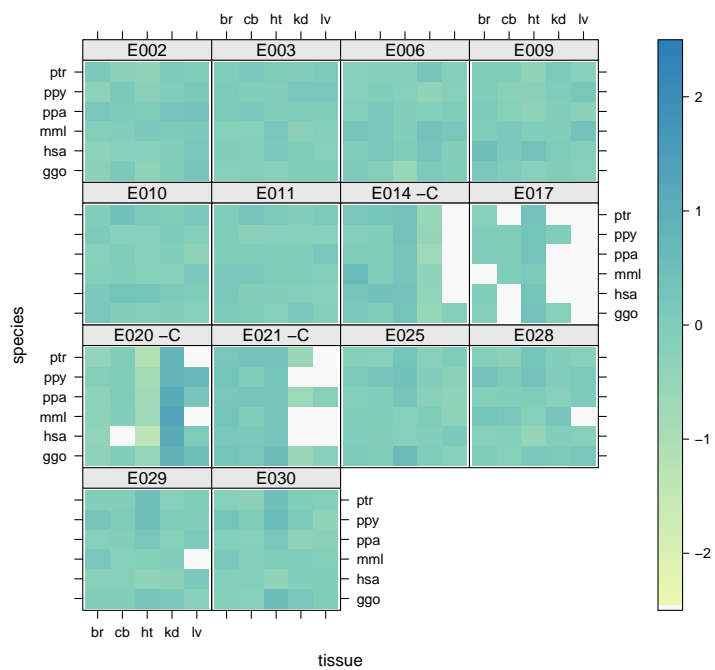

ENSG00000183048

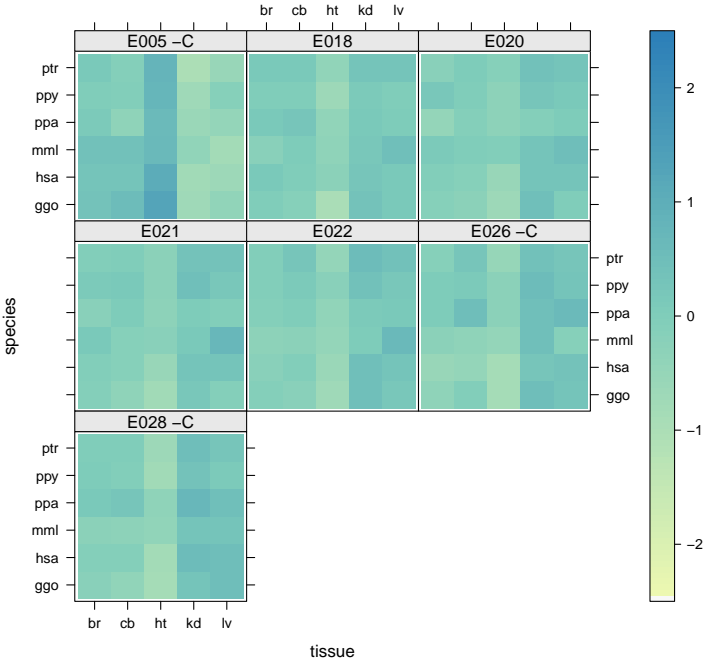



ENSG00000183696

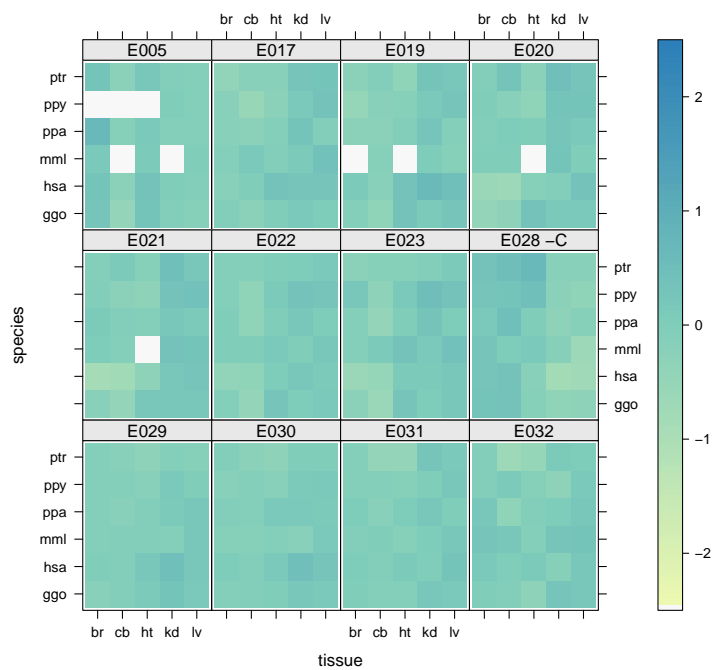

ENSG00000183726

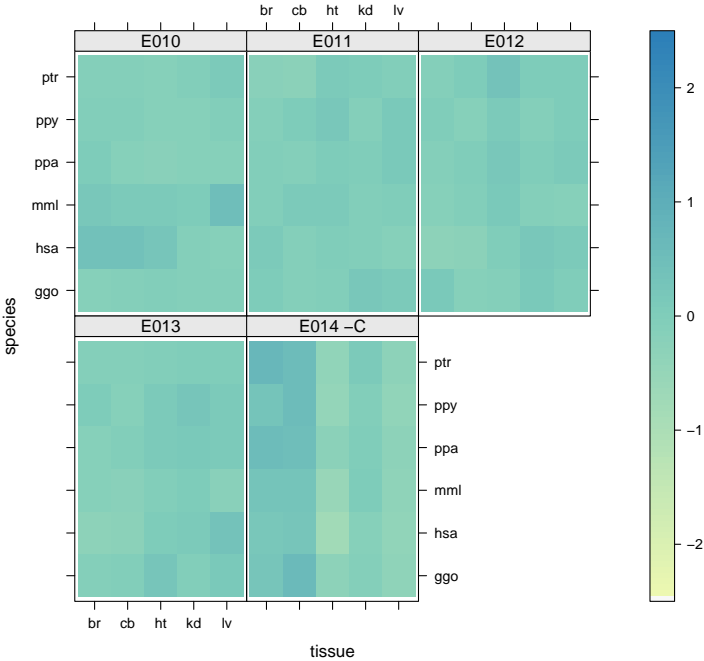

ENSG00000184381

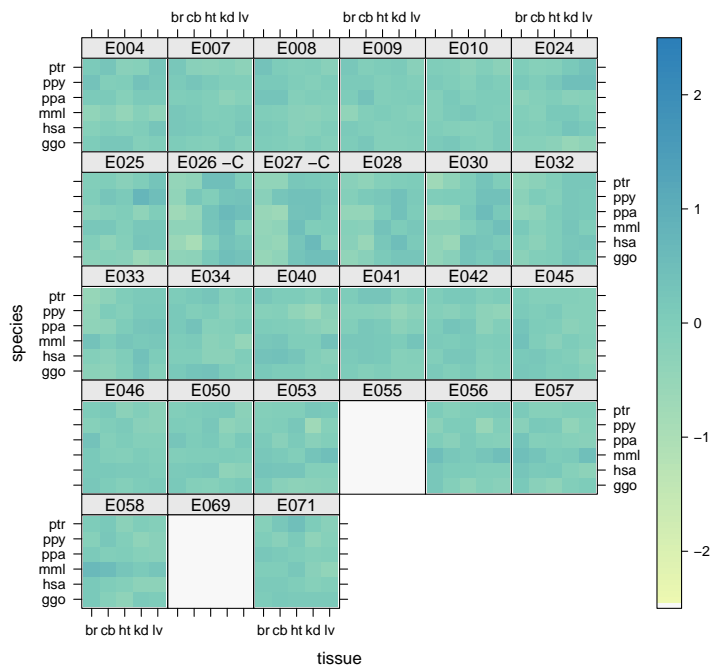



ENSG0000185624

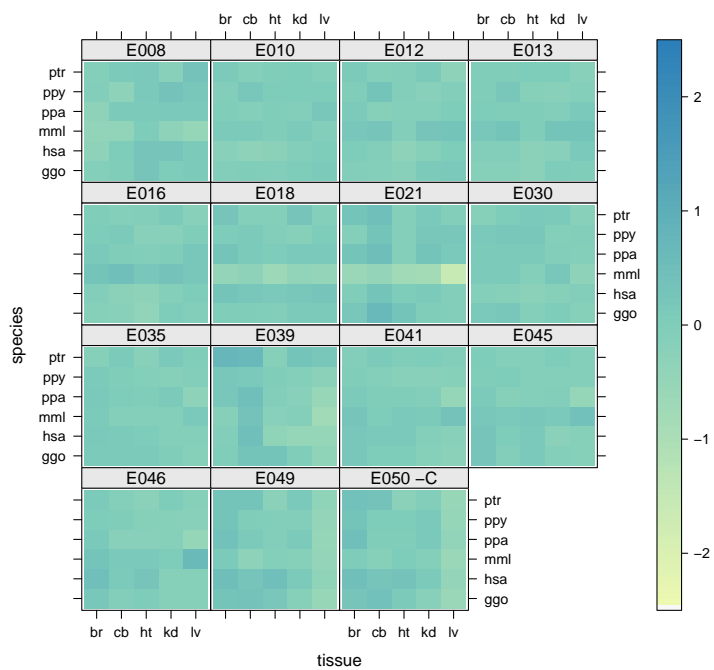

ENSG00000185630

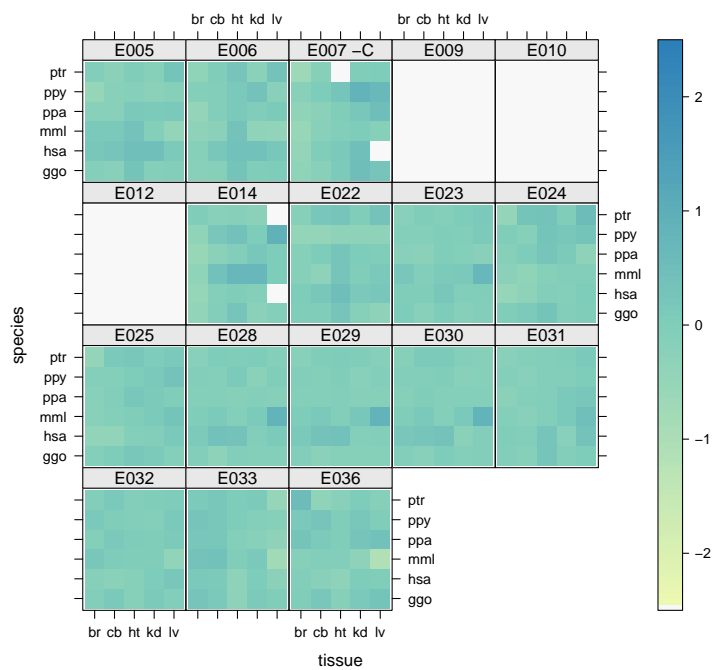



ENSG00000185963

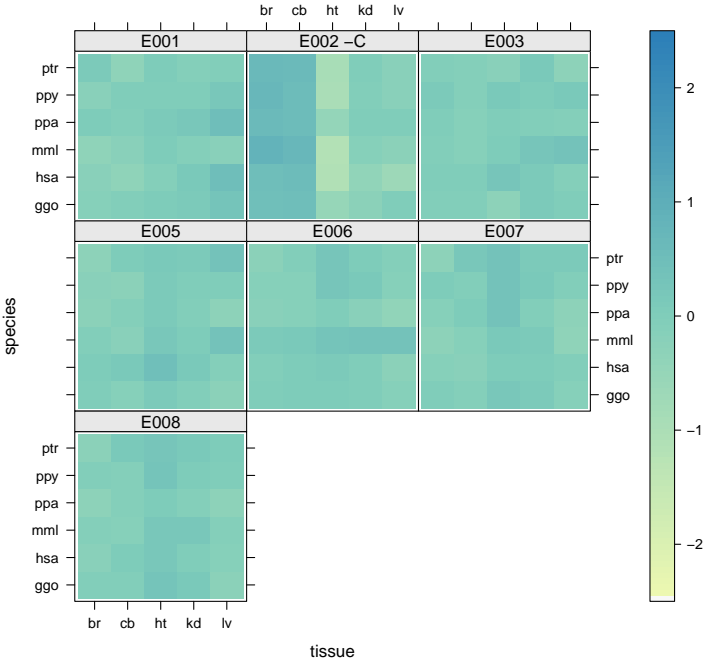

ENSG00000186001

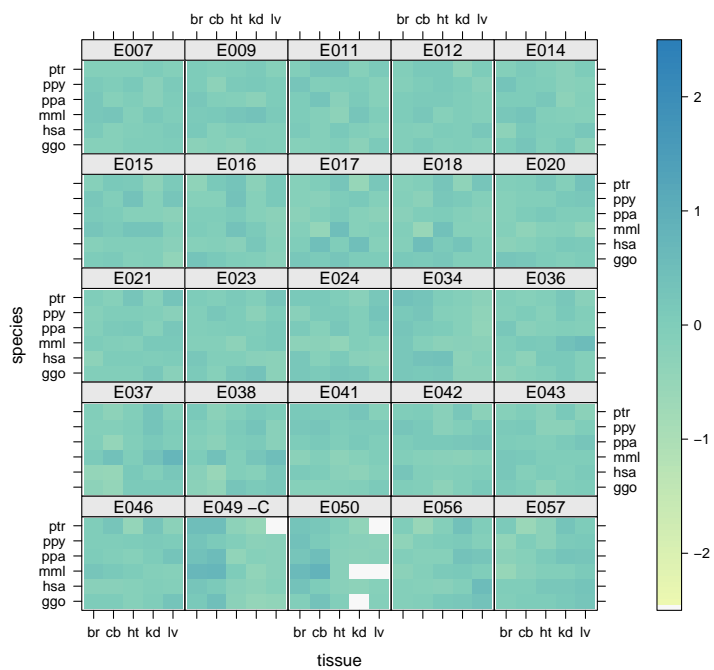

ENSG00000186111

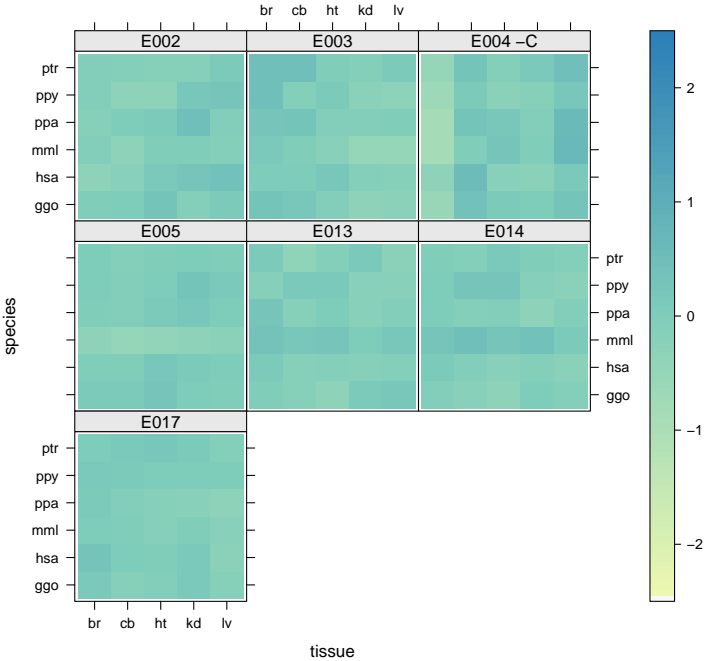



ENSG00000186868

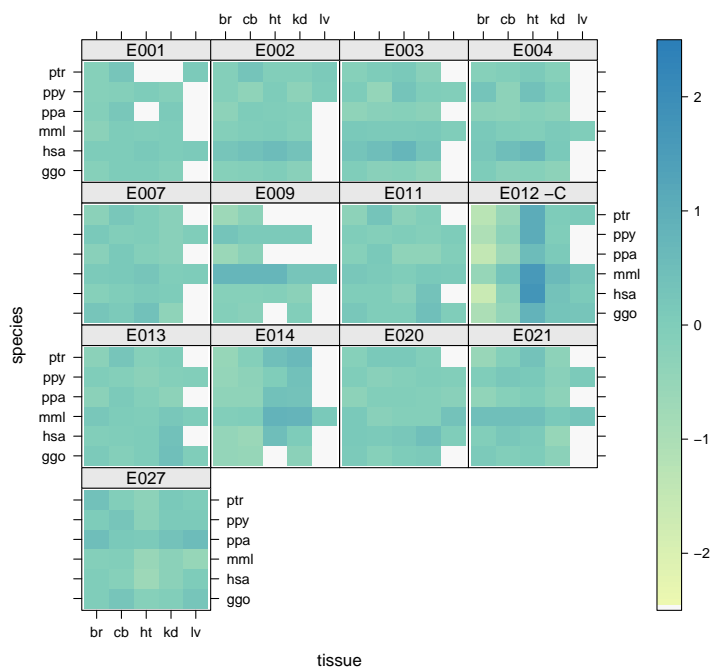





ENSG00000187164

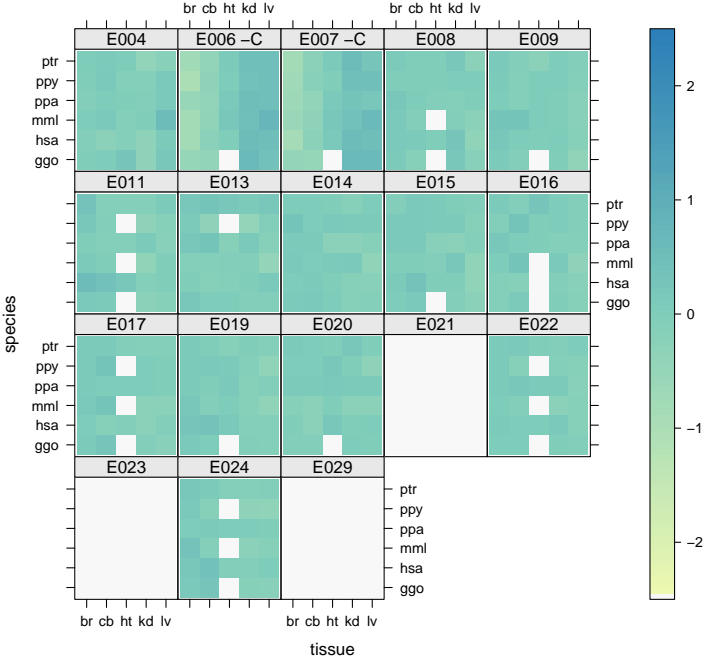





ENSG0000196504

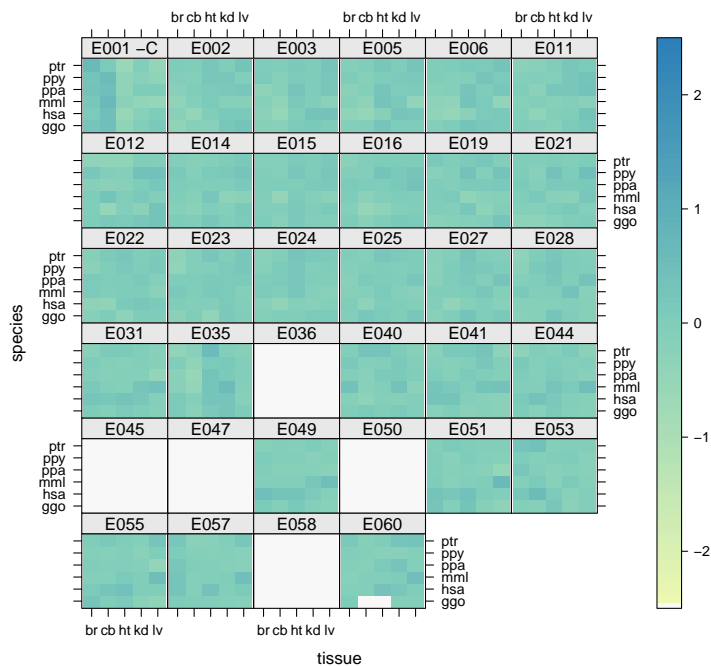

ENSG00000196526

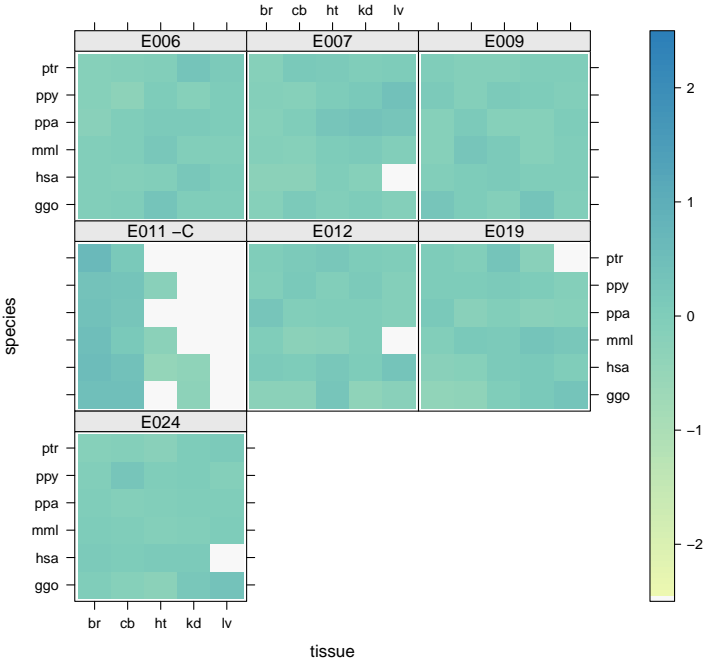

ENSG0000196586

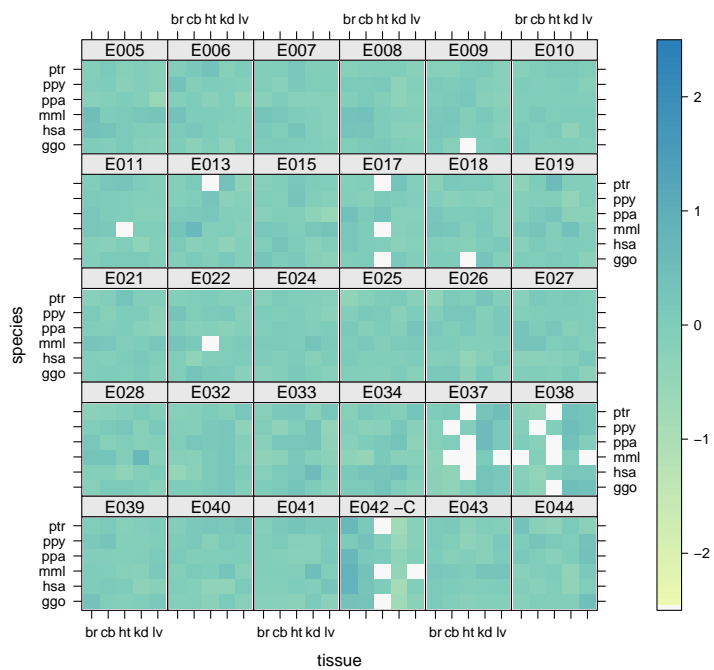







ENSG00000197142

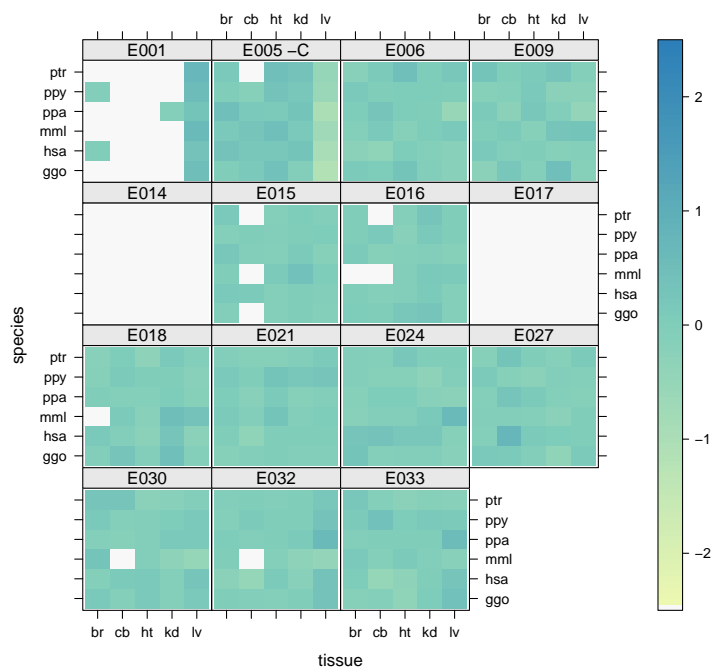

ENSG00000197157

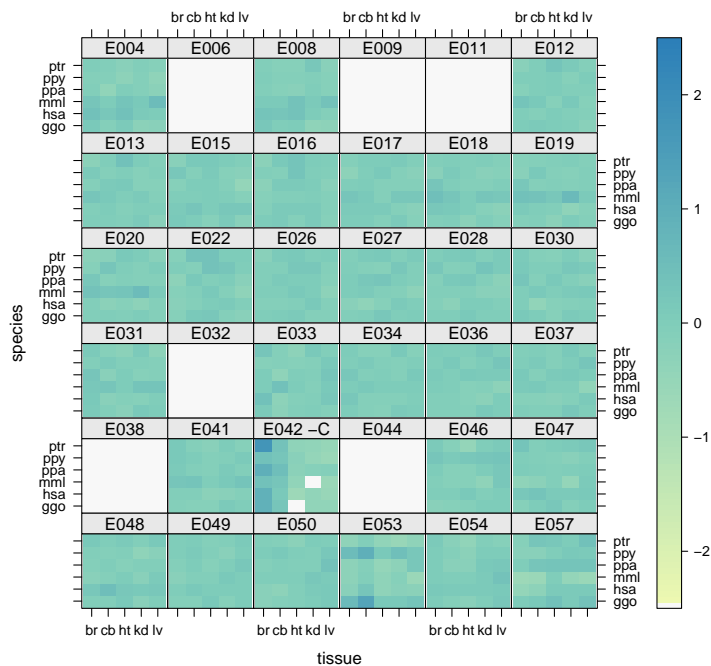



ENSG00000197283

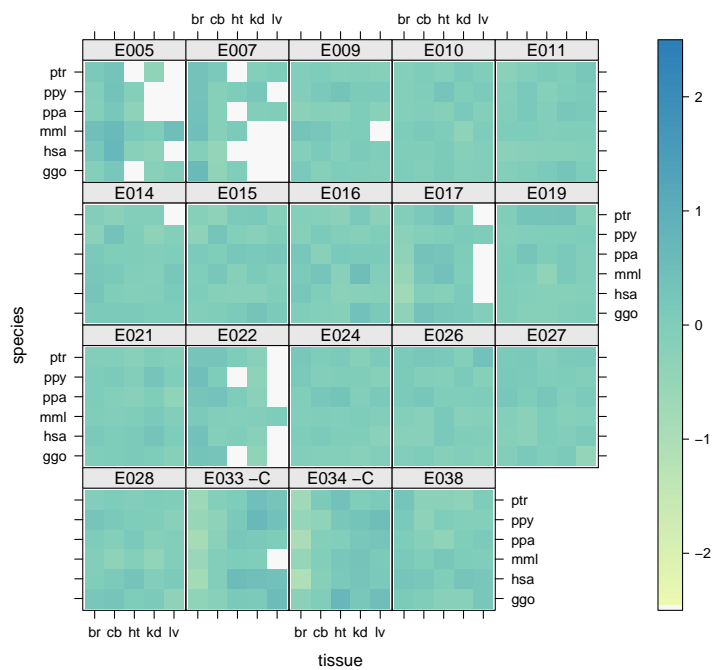

ENSG00000197448

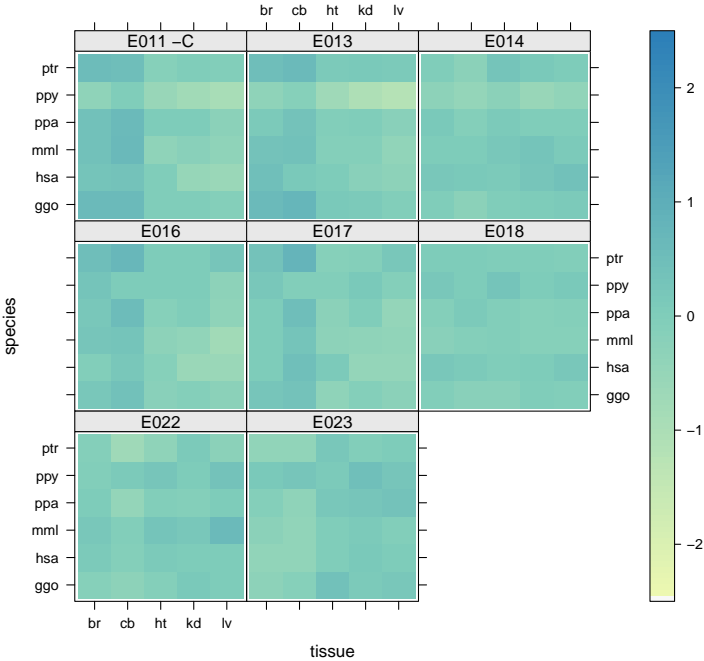



ENSG0000197694

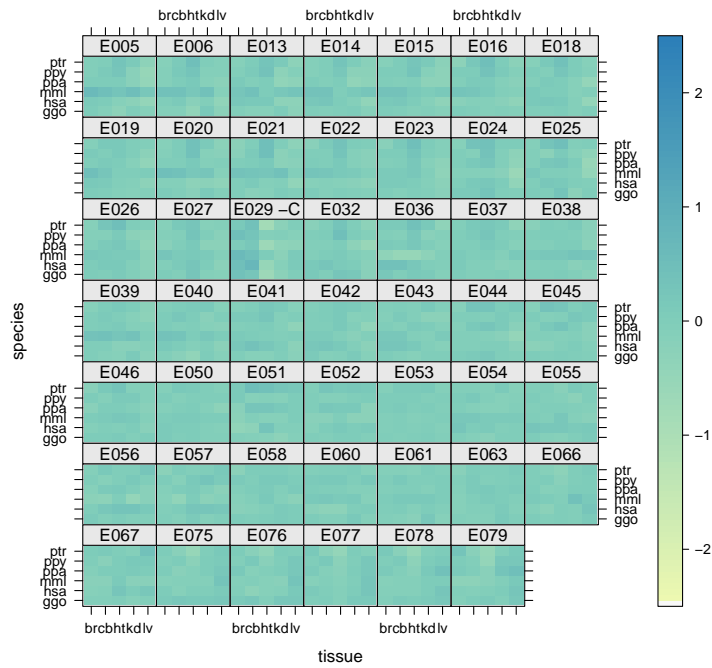



ENSG00000197893

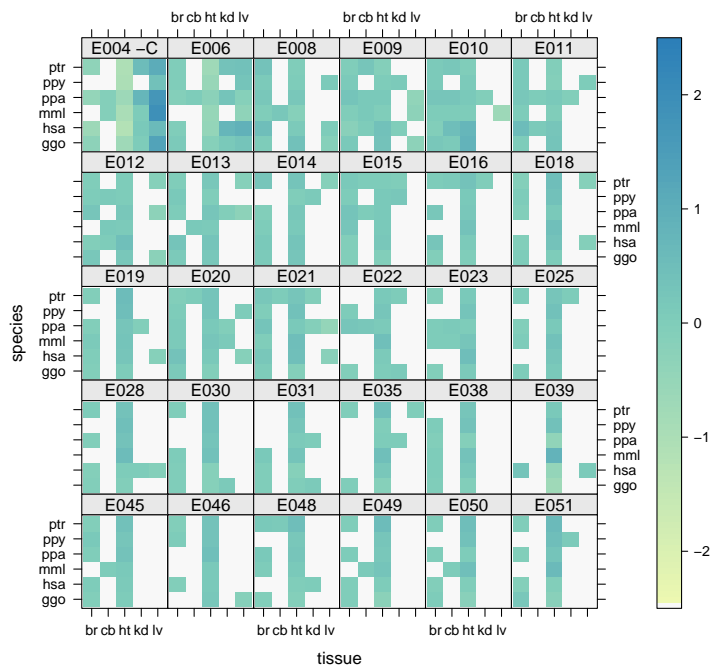

ENSG00000197948

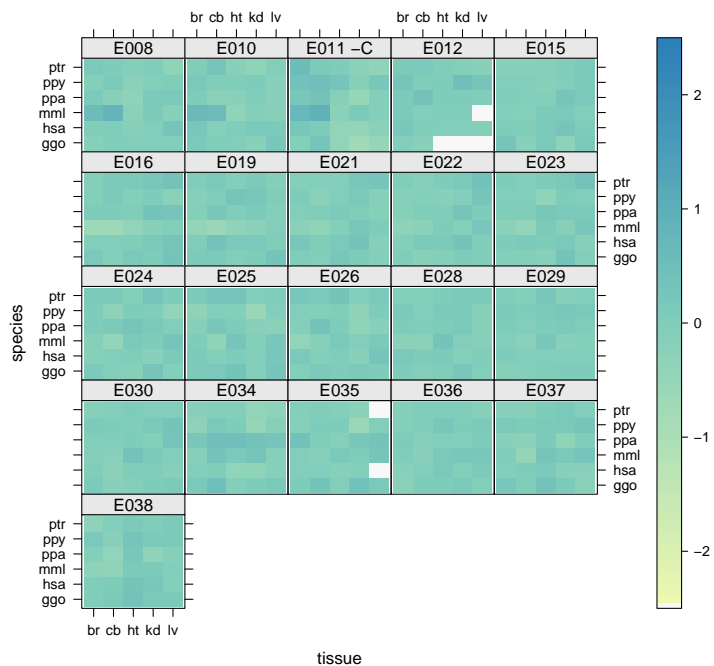



ENSG00000198130

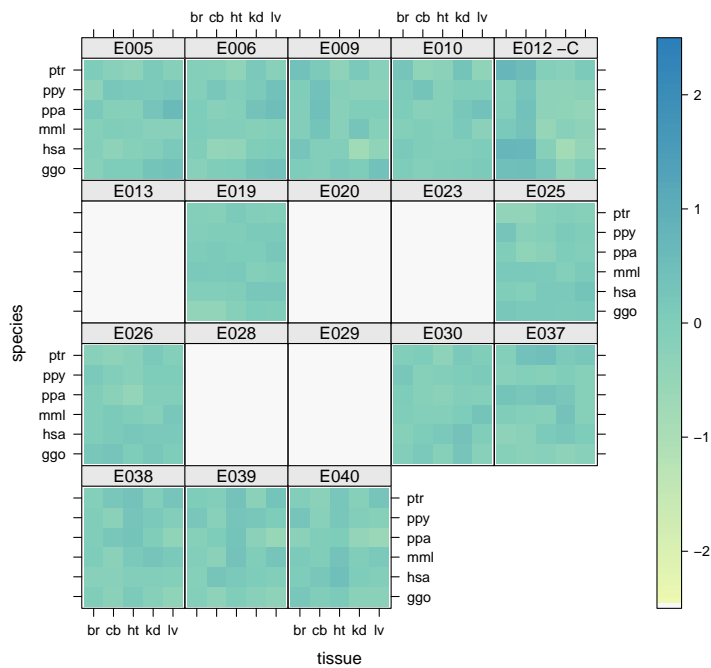

ENSG00000198171

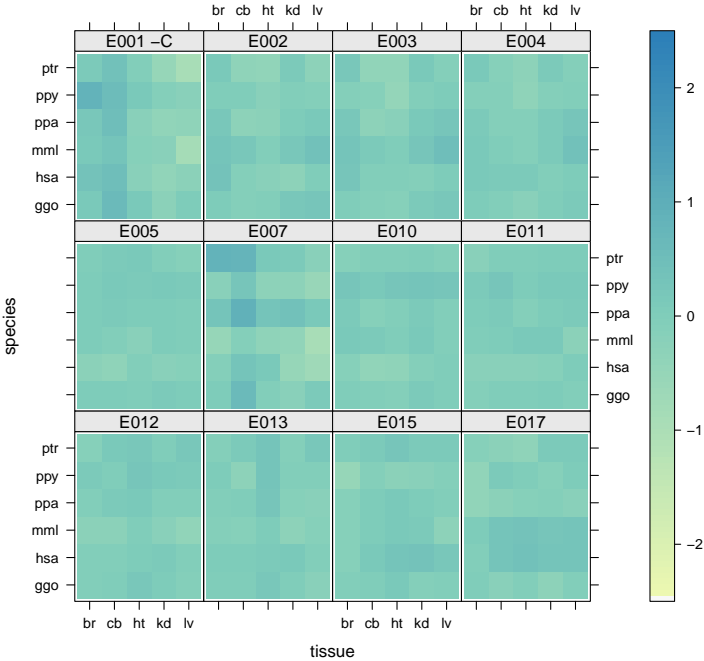

ENSG00000198363

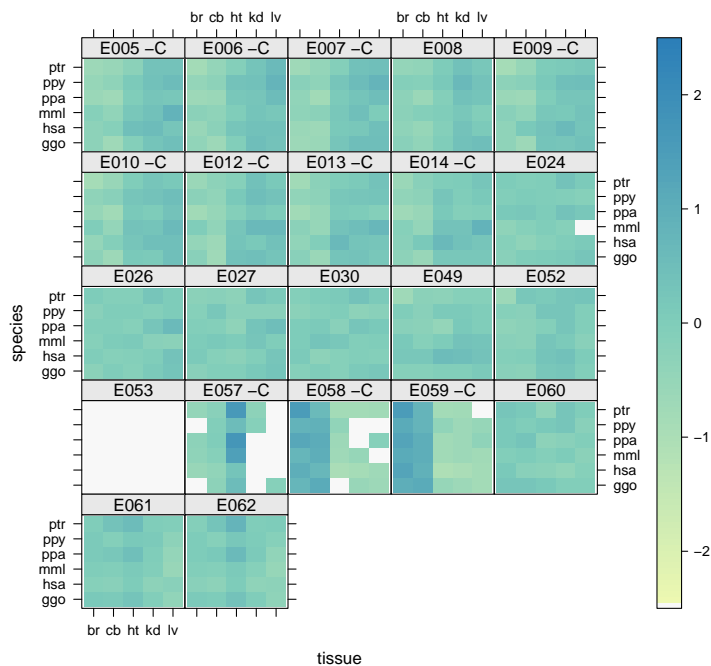

ENSG00000198586

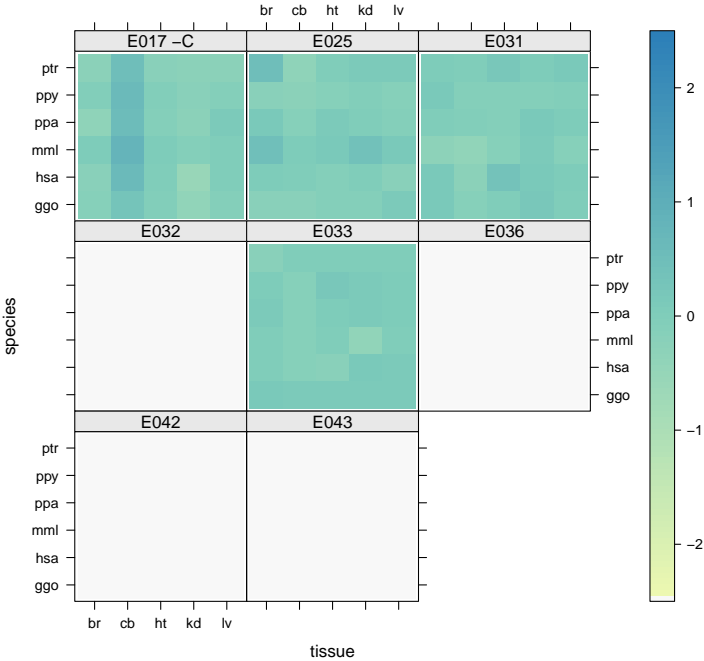

ENSG00000198825

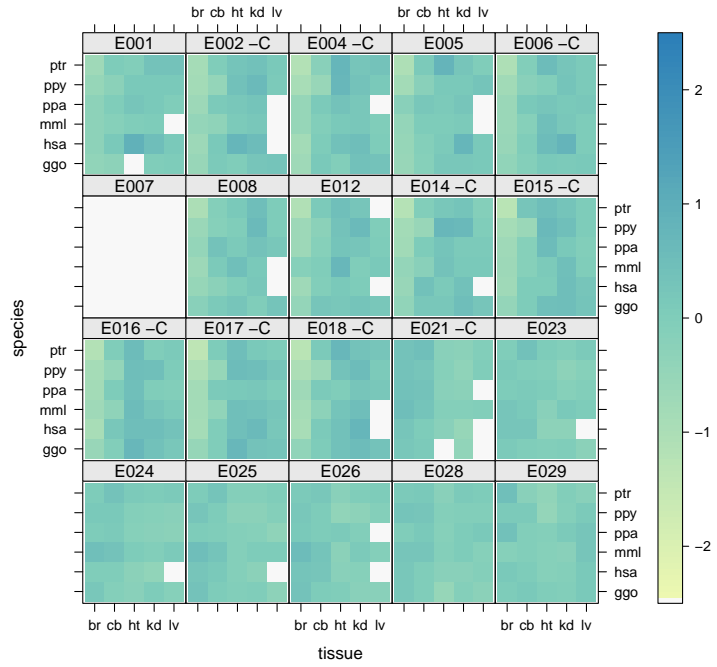







ENSG00000204310

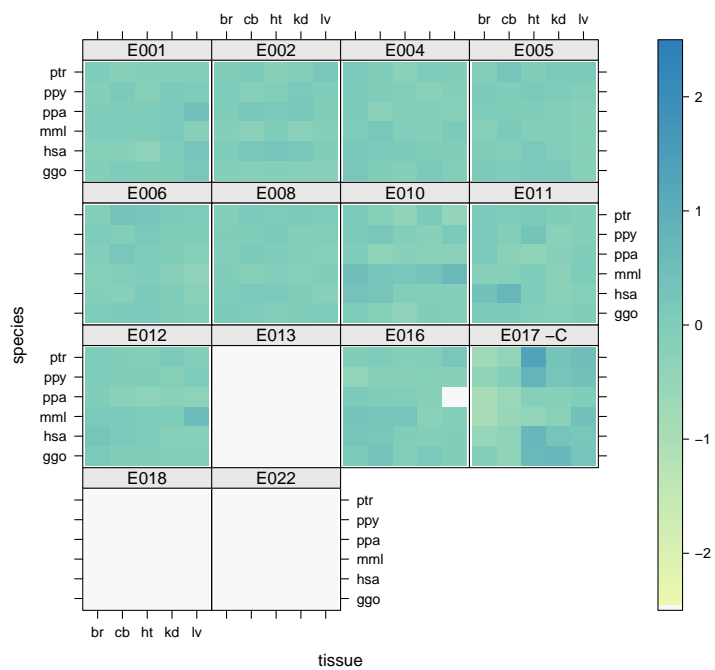

ENSG00000204444

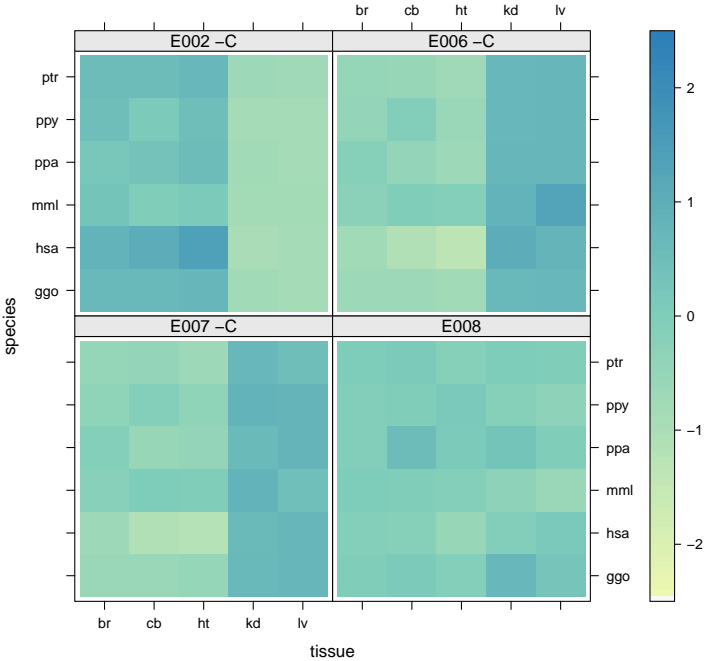



ENSG0000204580

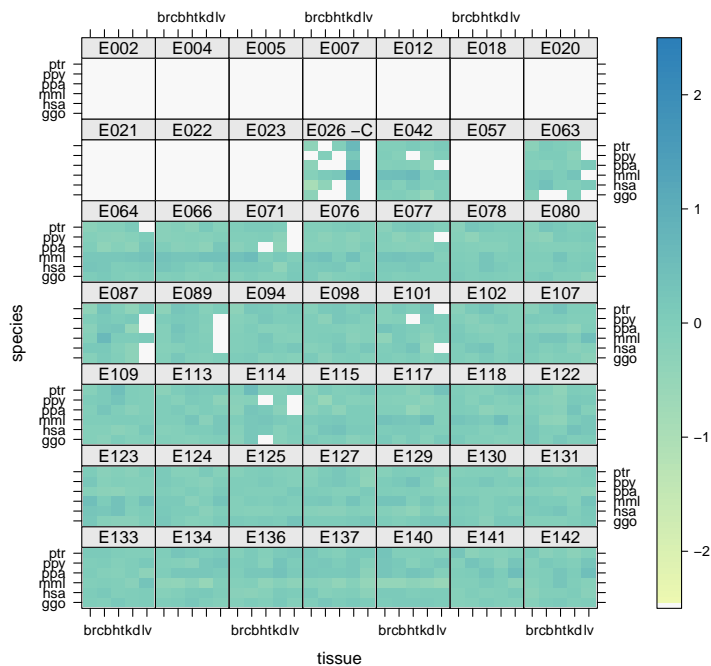







ENSG00000205683

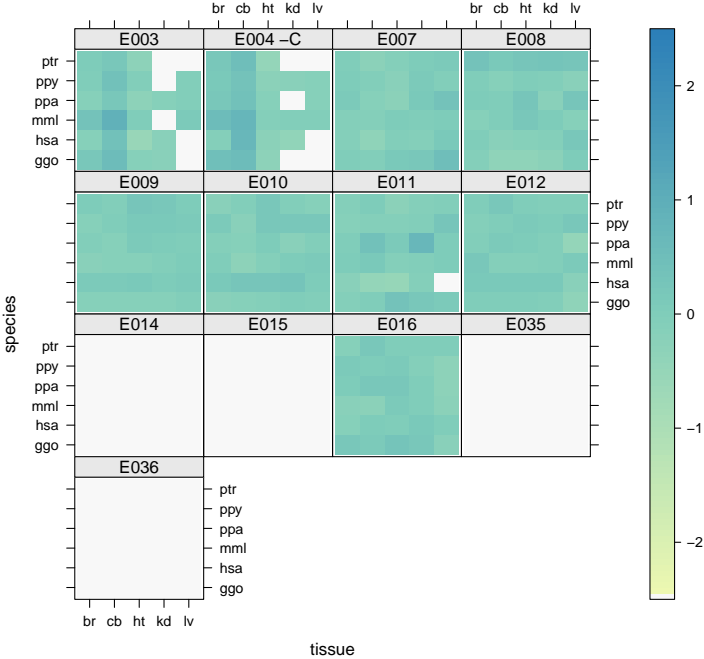



ENSG00000214063

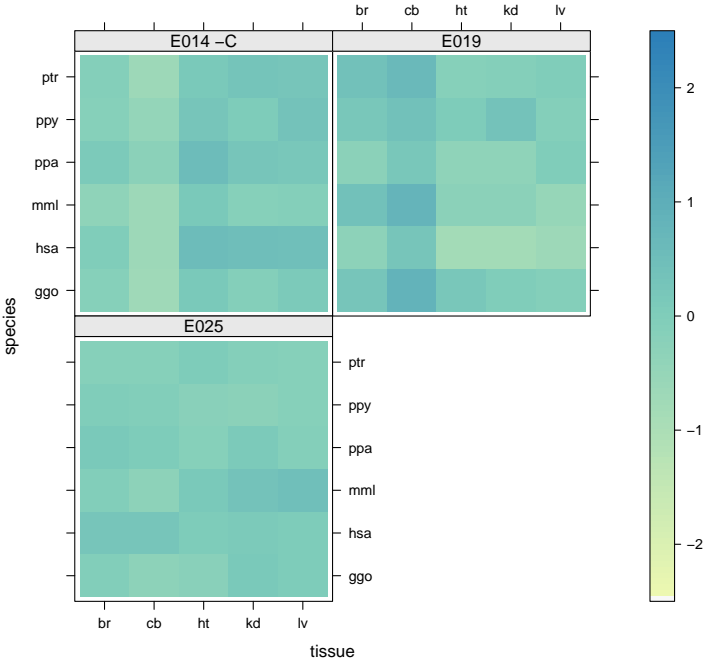

ENSG00000239388

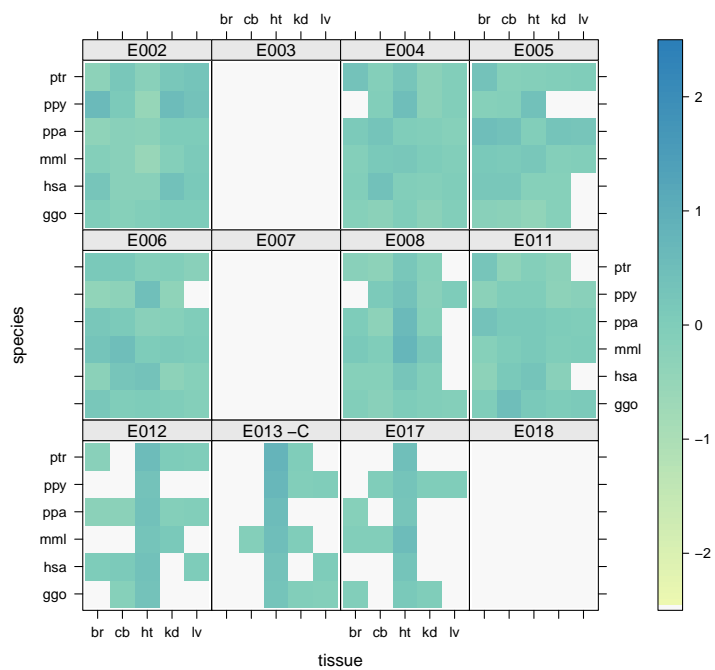

ENSG00000241878

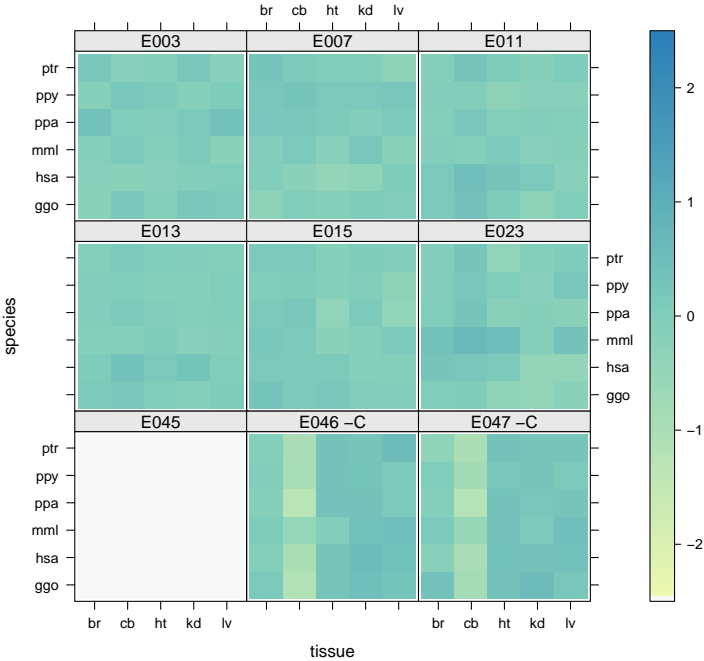

Supplement: 1307202110_sd01.pdf [file 1307202110_sd01.pdf]
